# Supplementary material for: Multi-site, multi-crop measurements in the soil–vegetation–atmosphere continuum: a comprehensive dataset from two climatically contrasting regions in southwestern Germany for the period 2009–2018
Source: Copernicus journal article supplement (doi:10.5194/essd-14-1153-2022), 2022-03-11

ec1 2010  
depth 5 cm

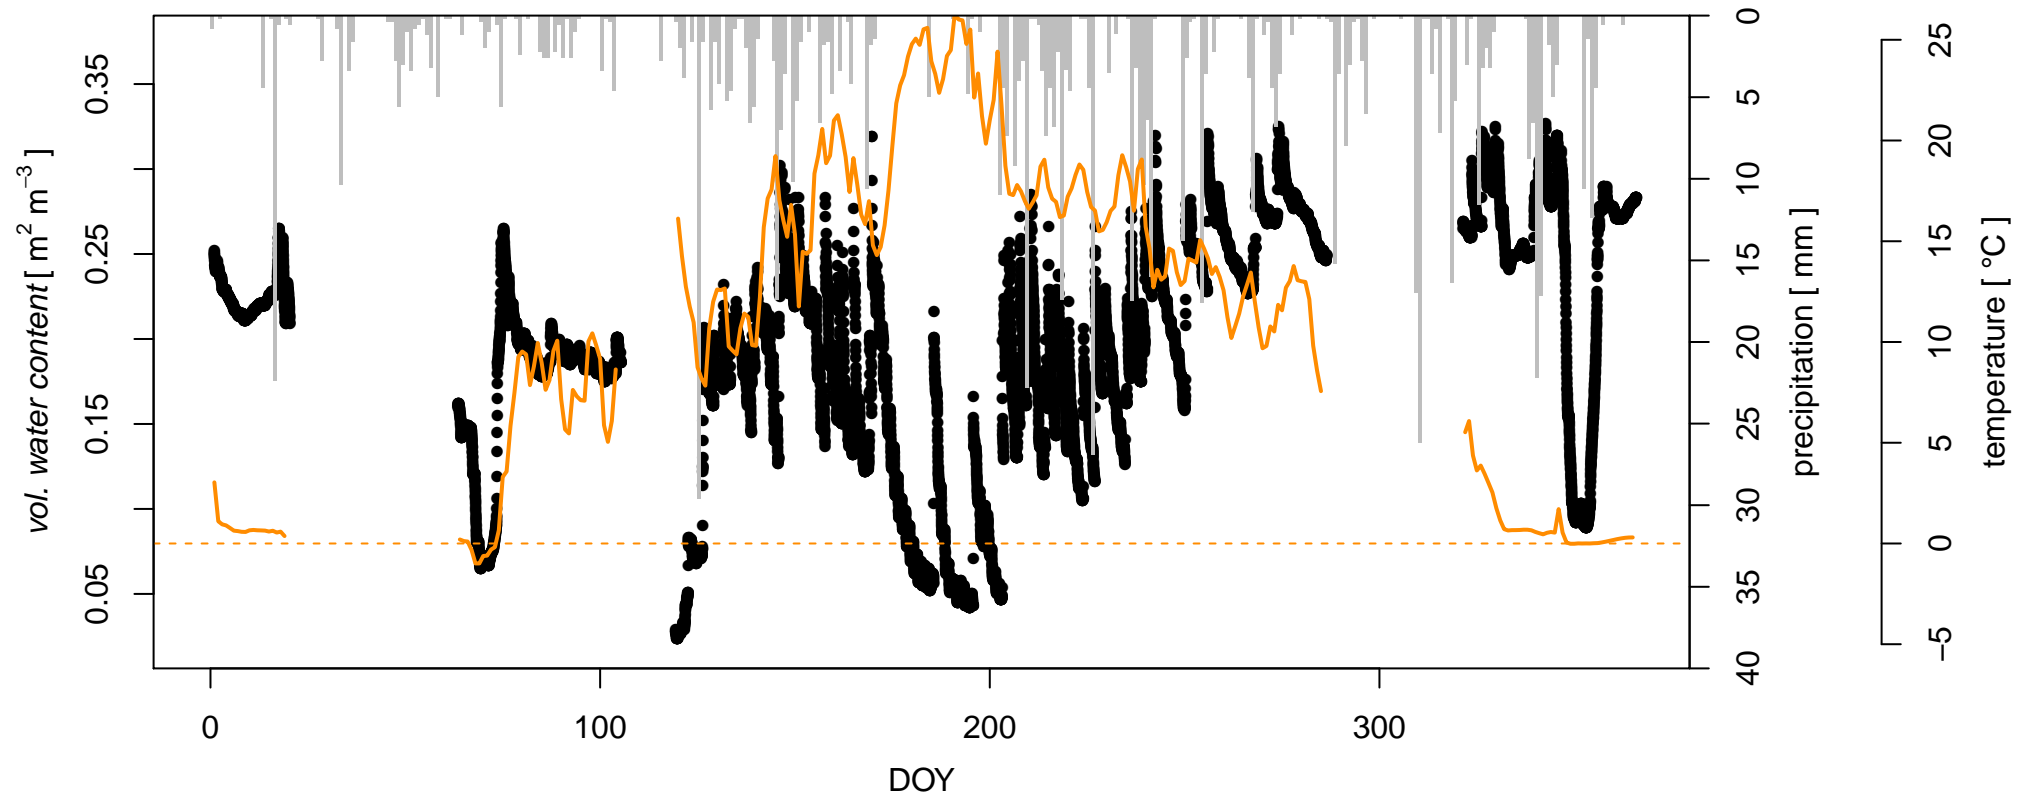

ec1 2011  
depth 5 cm

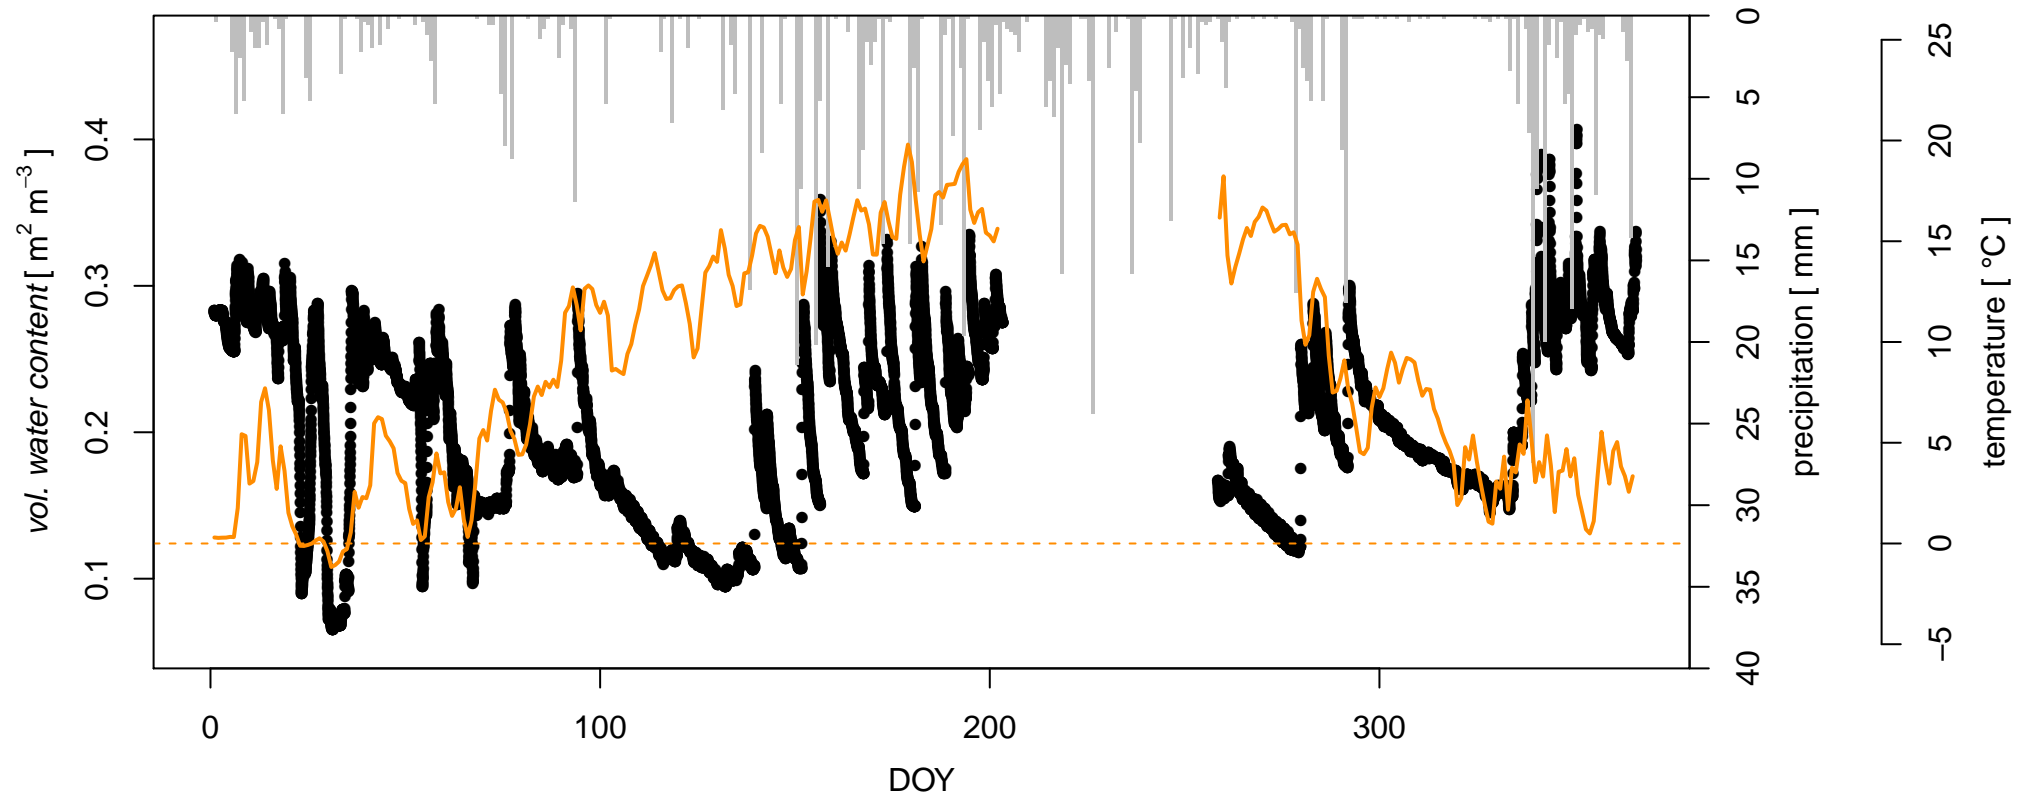

ec1 2012  
depth 5 cm

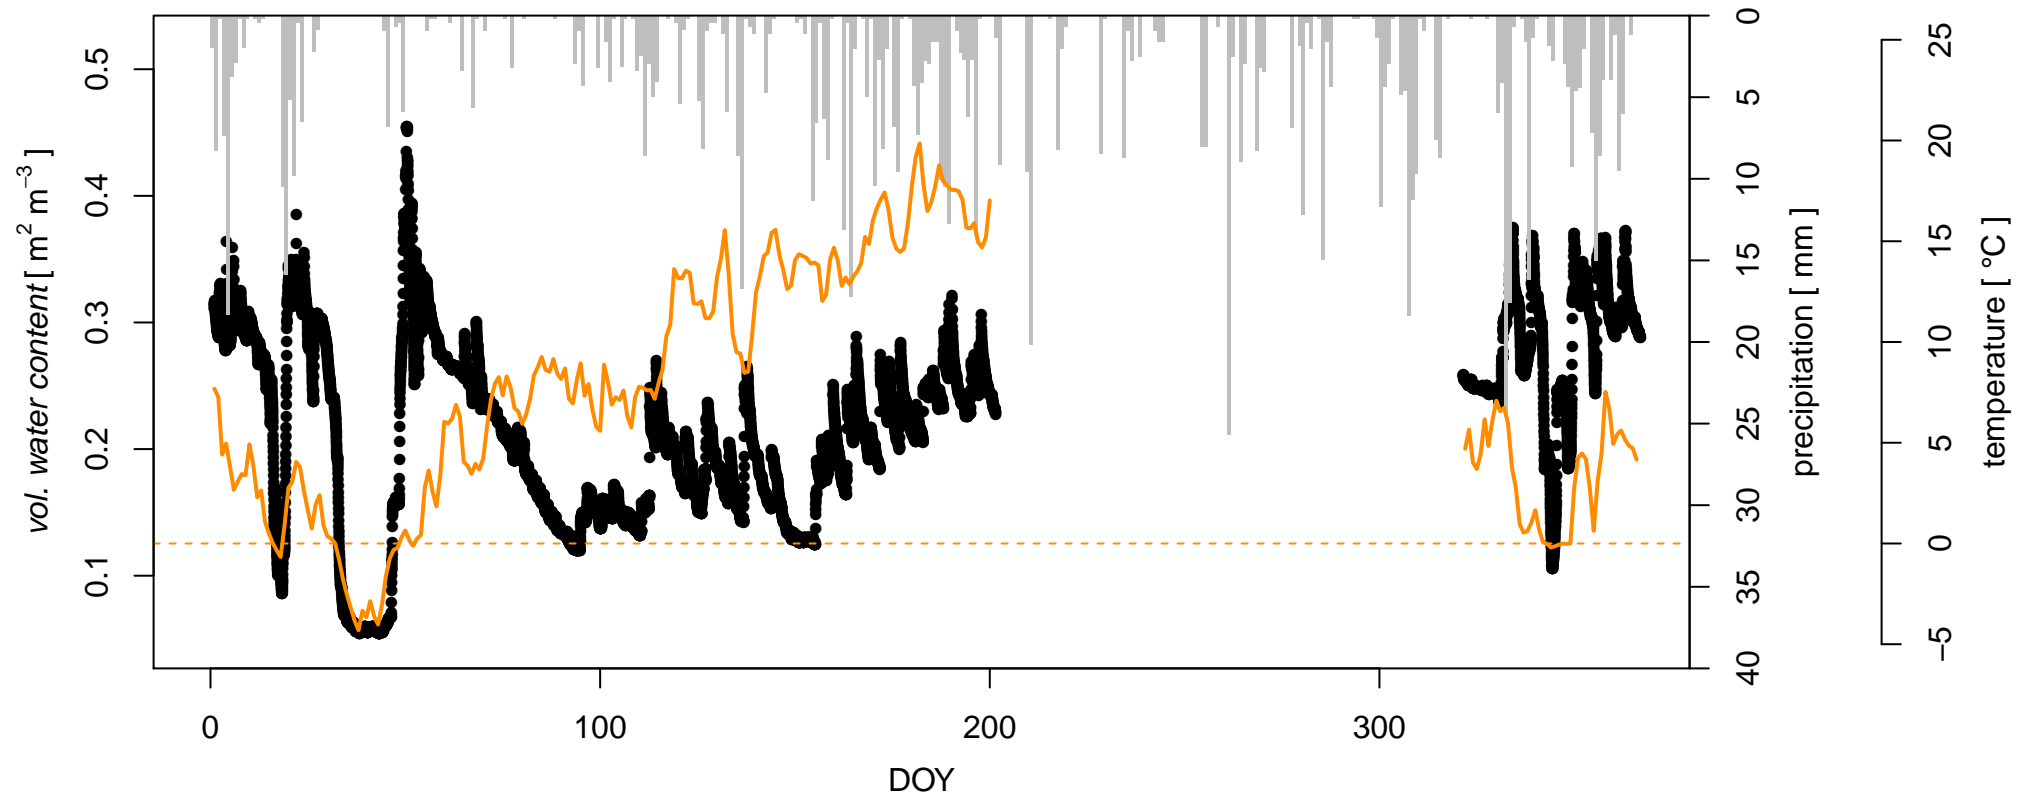

ec1 2013  
depth 5 cm

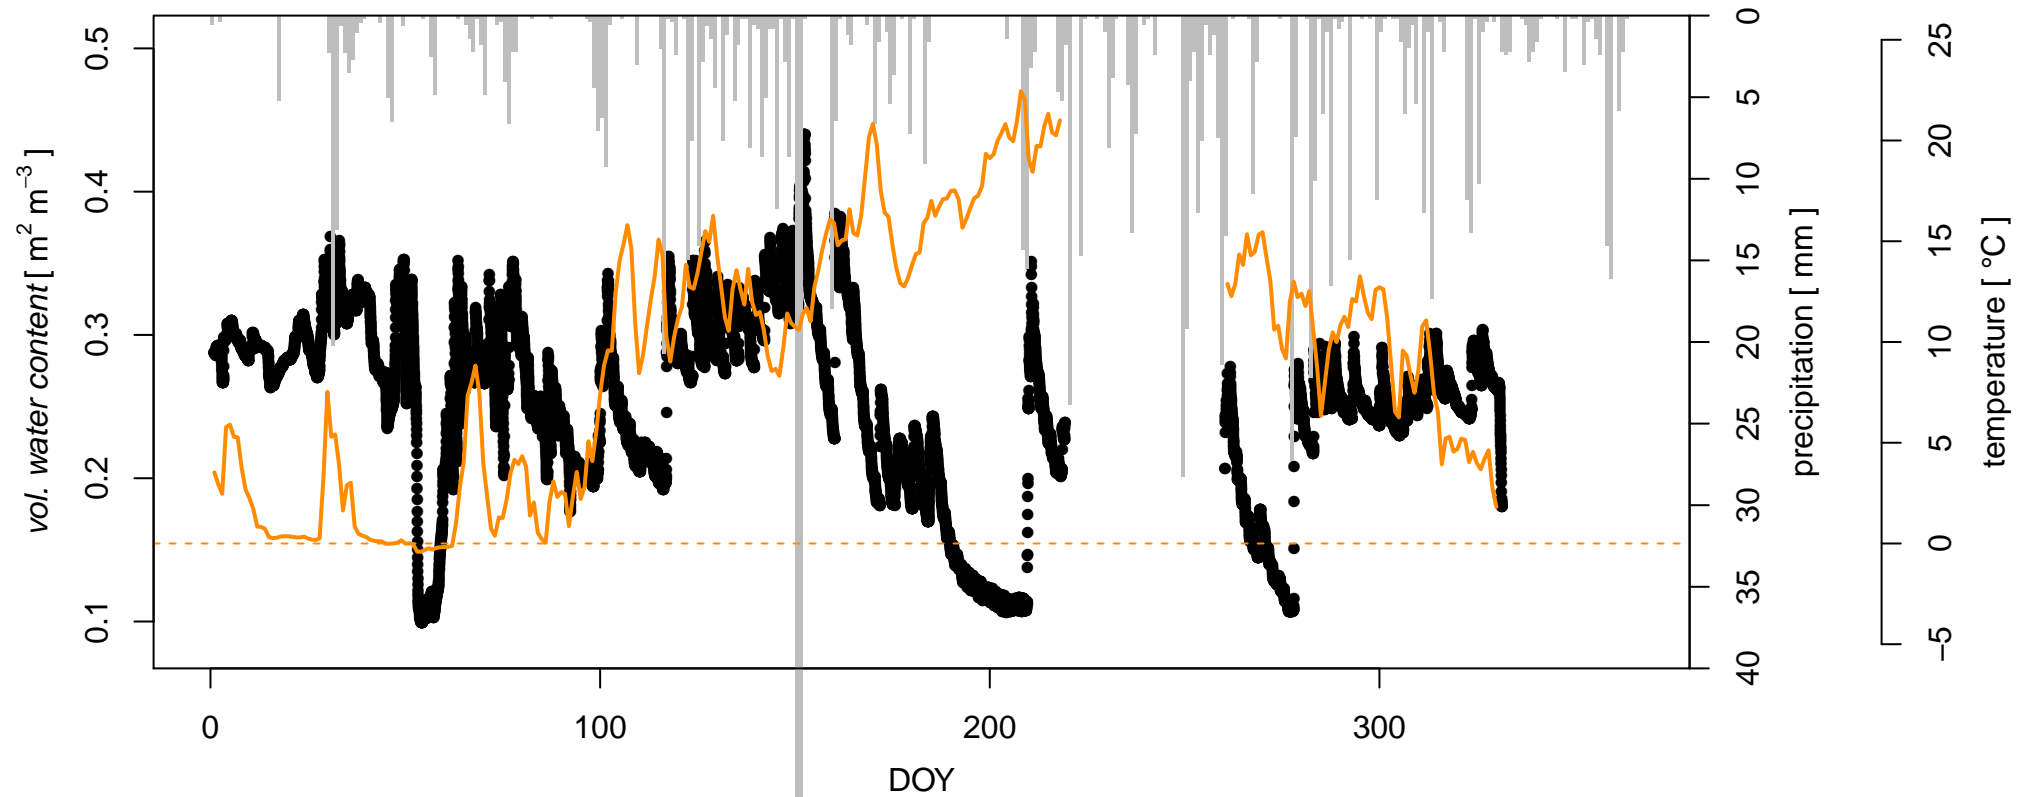

ec1 2014  
depth 5 cm

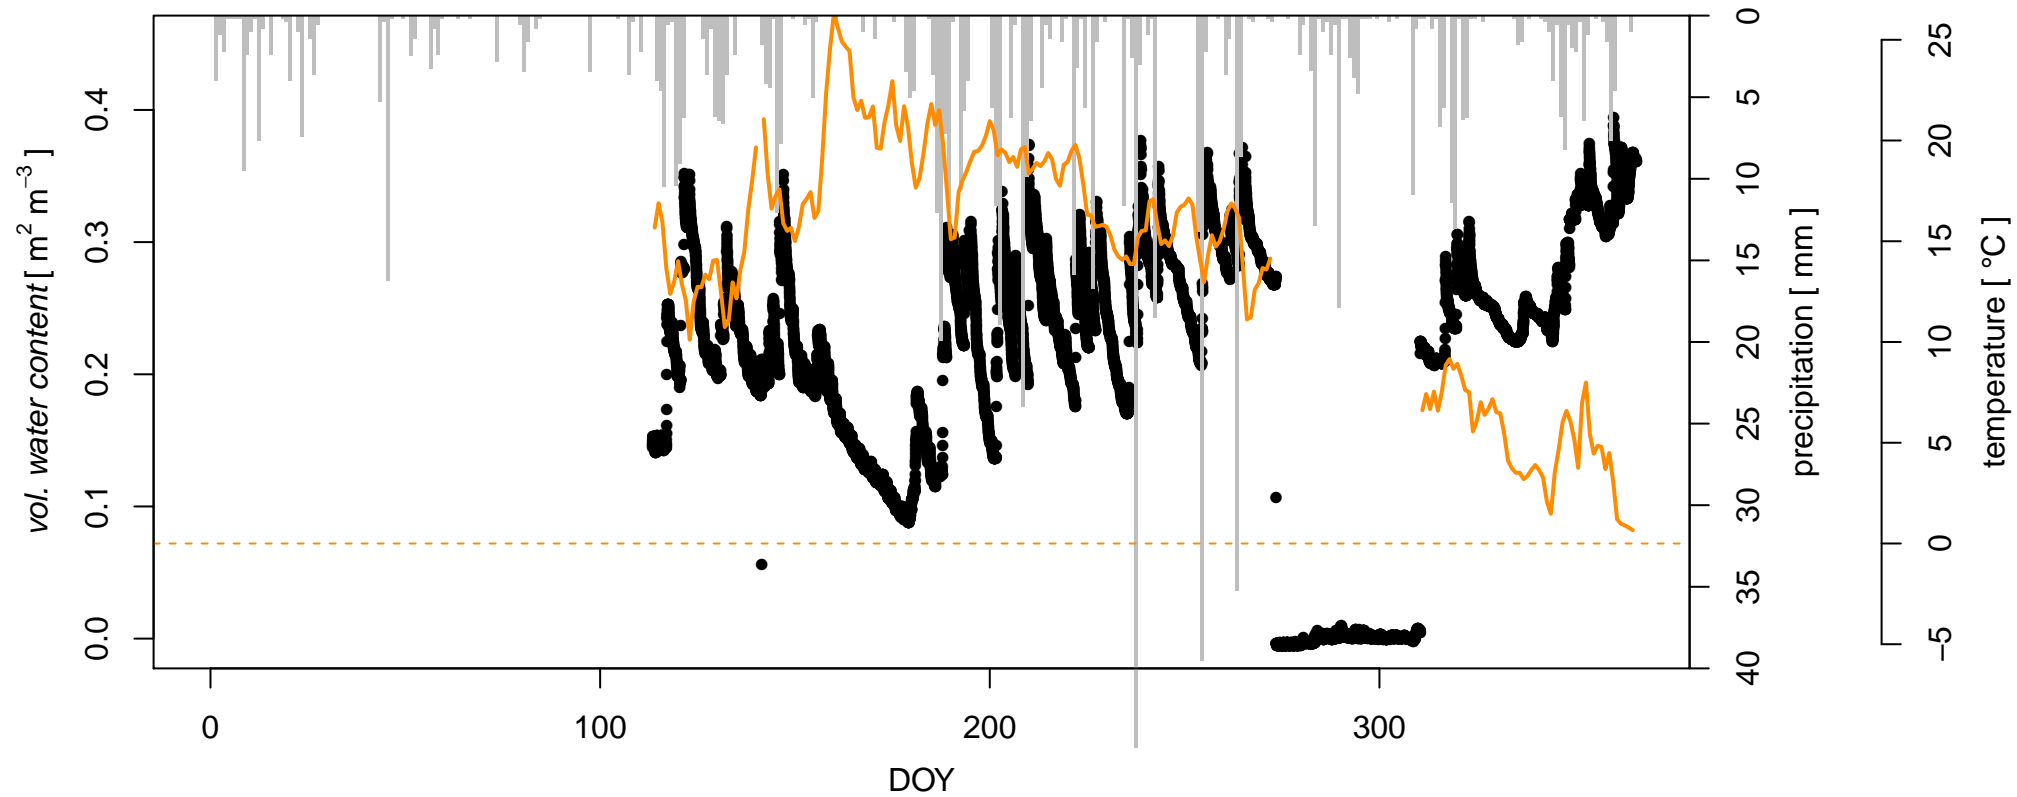

ec1 2015  
depth 5 cm

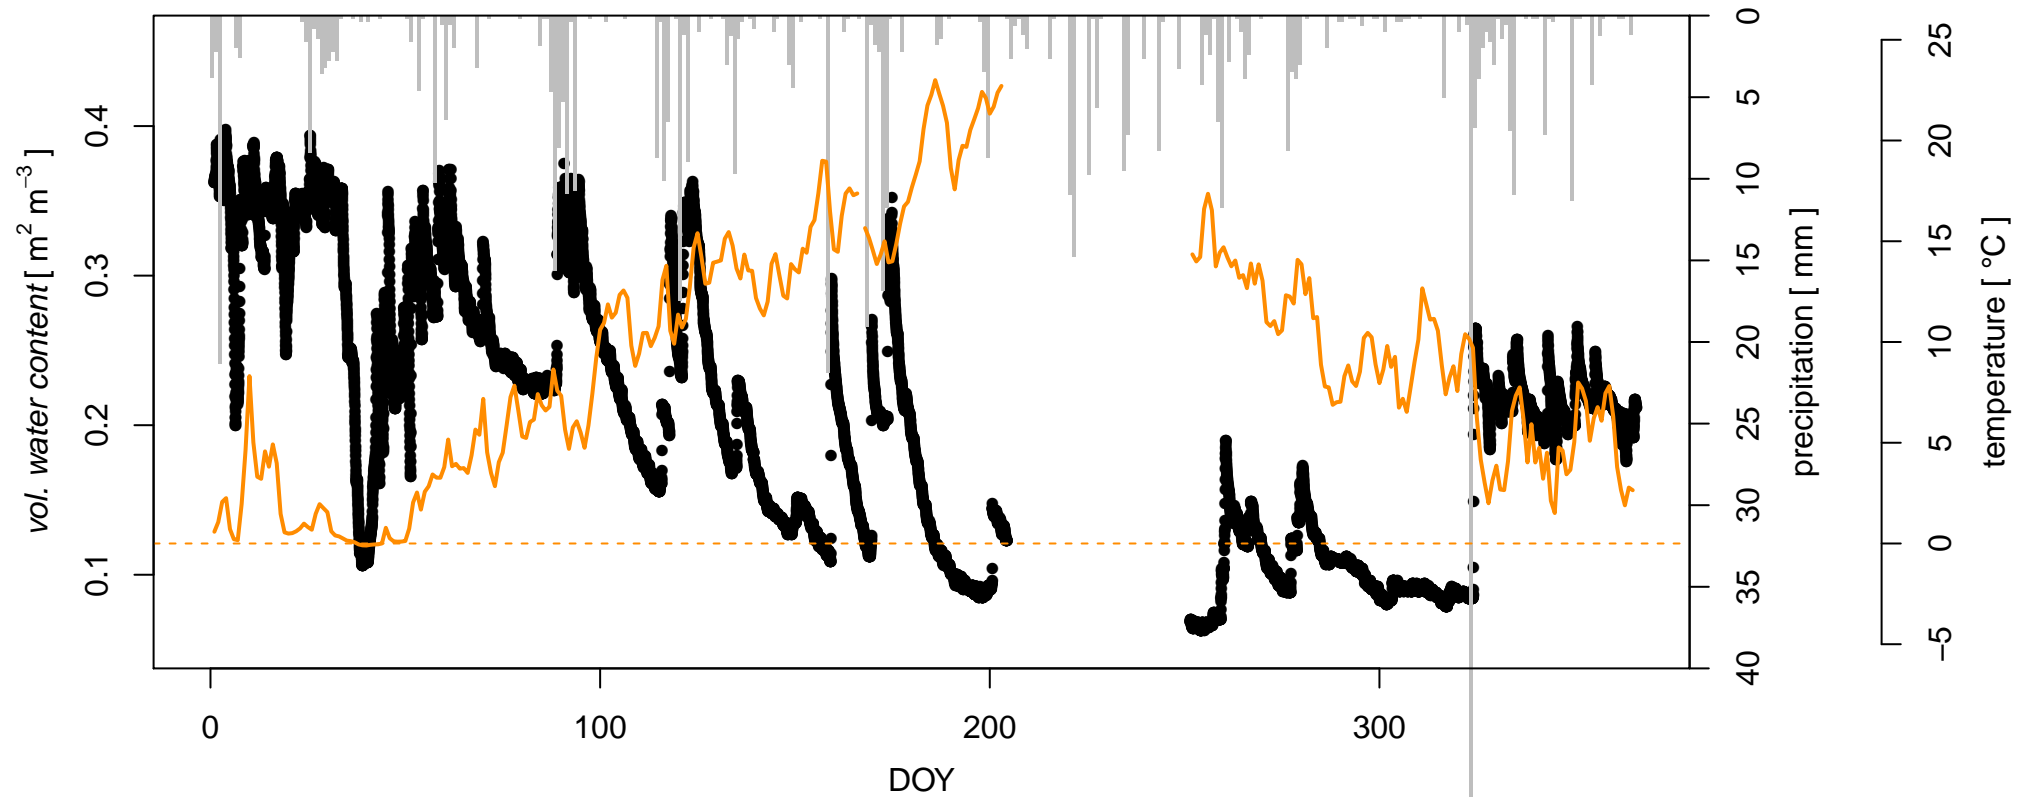

ec1 2016  
depth 5 cm

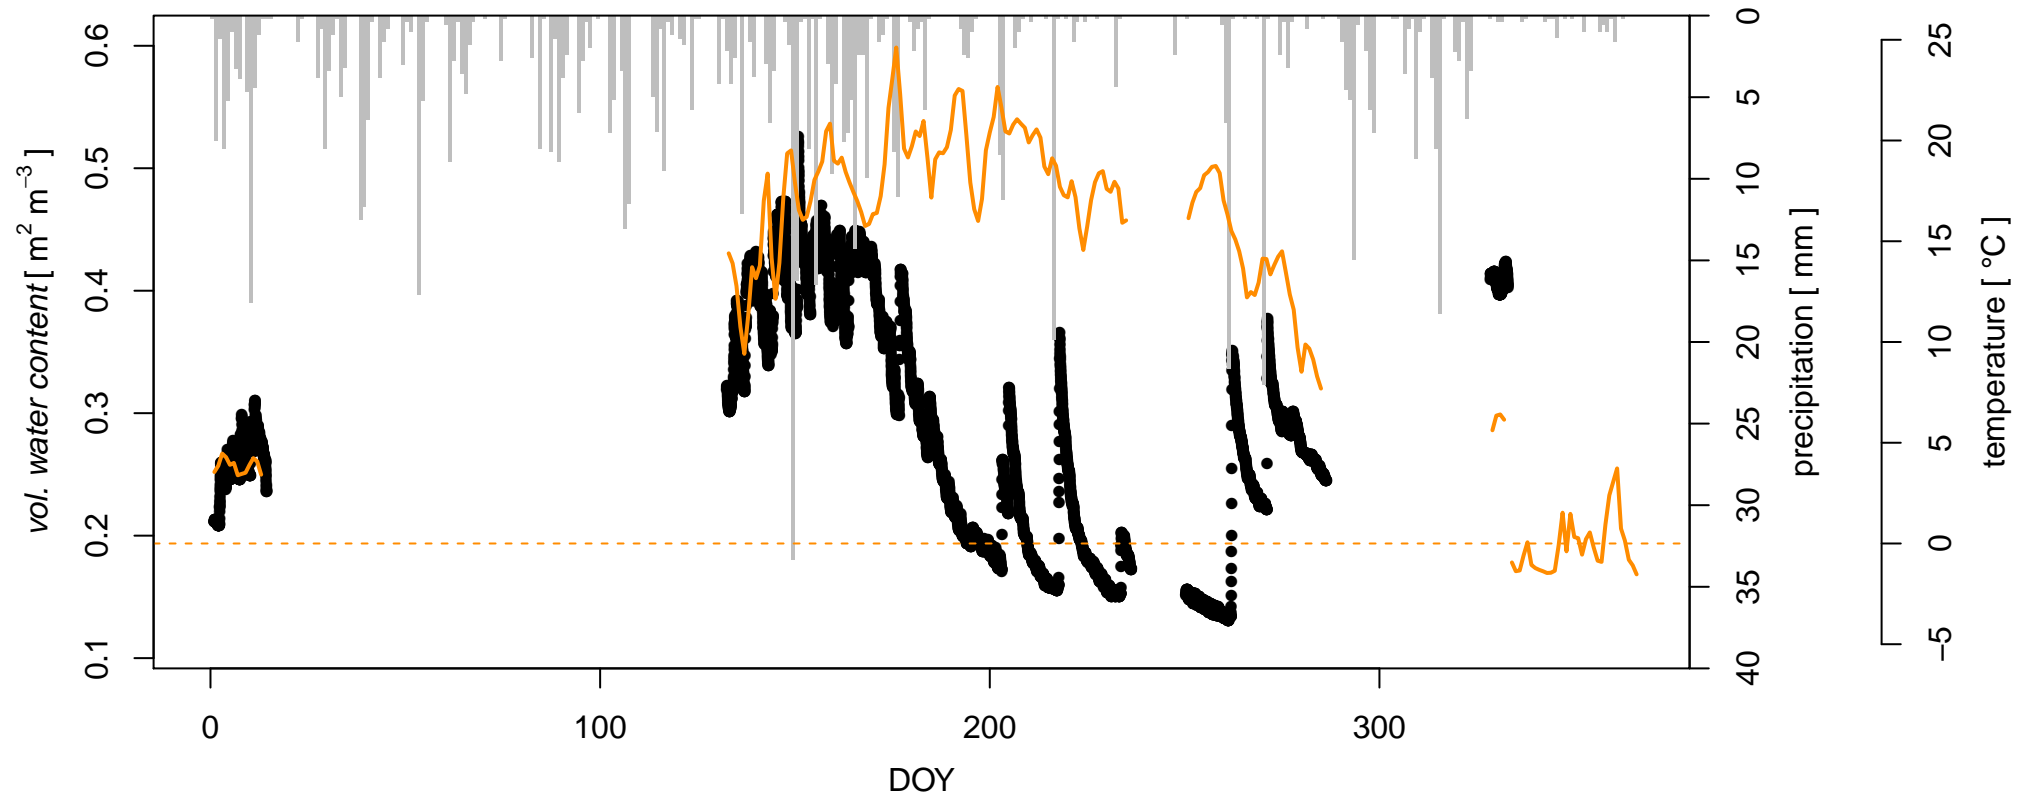

ec1 2017  
depth 5 cm

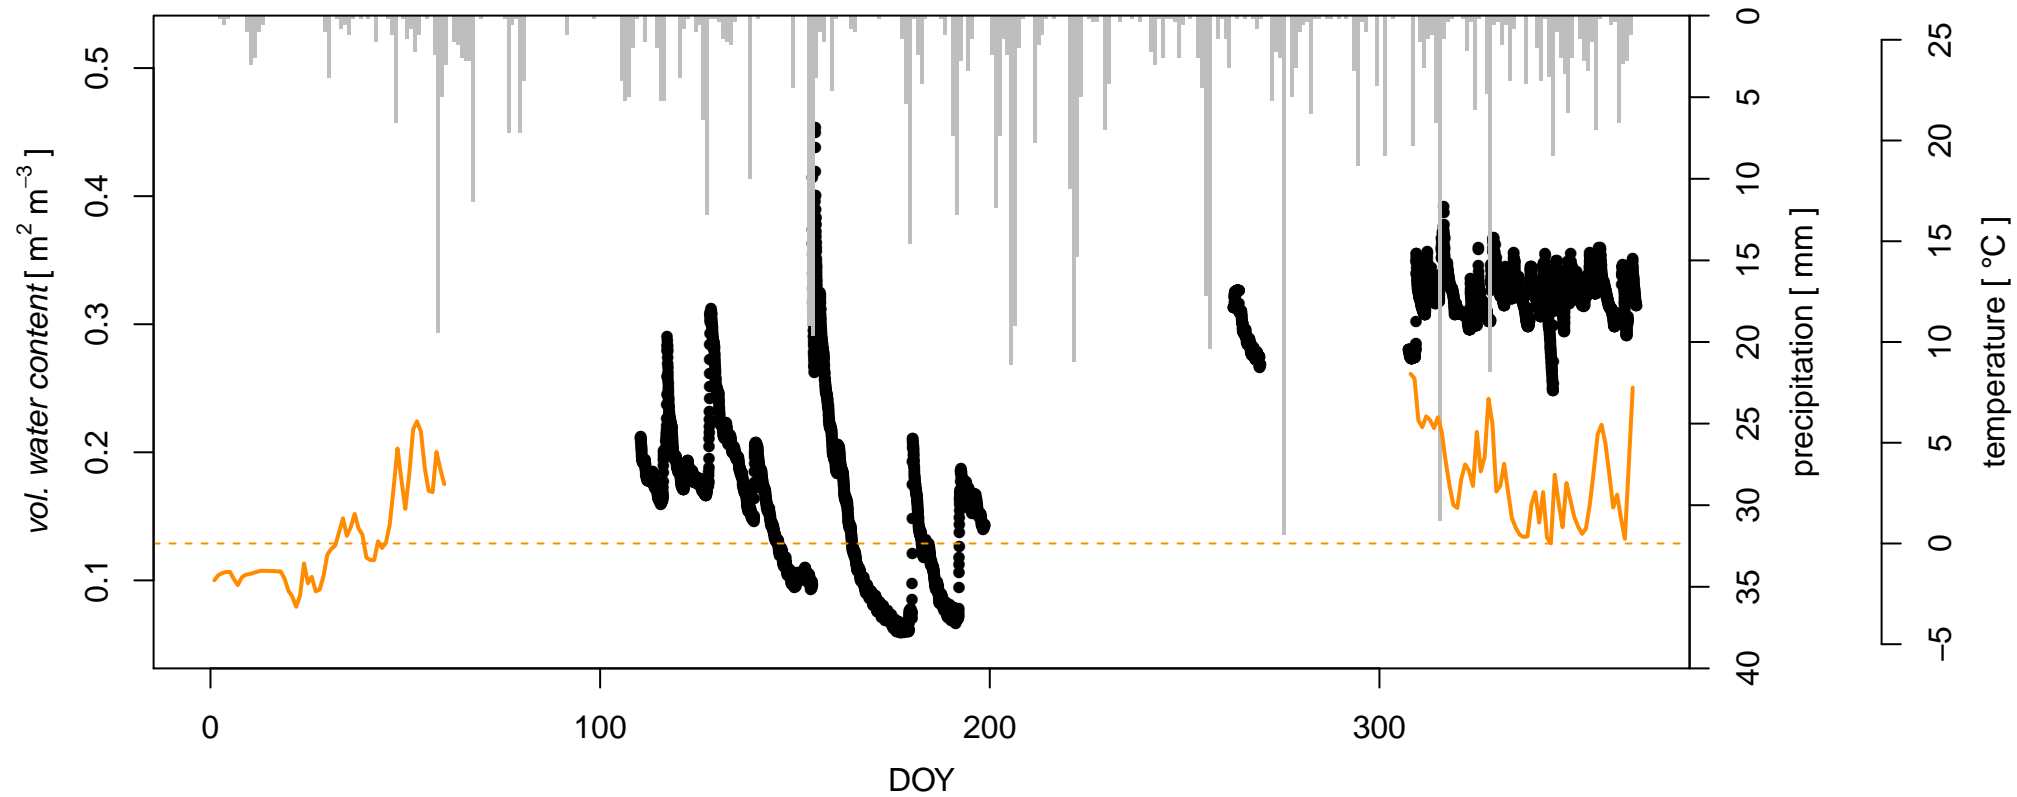

ec1 2018  
depth 5 cm

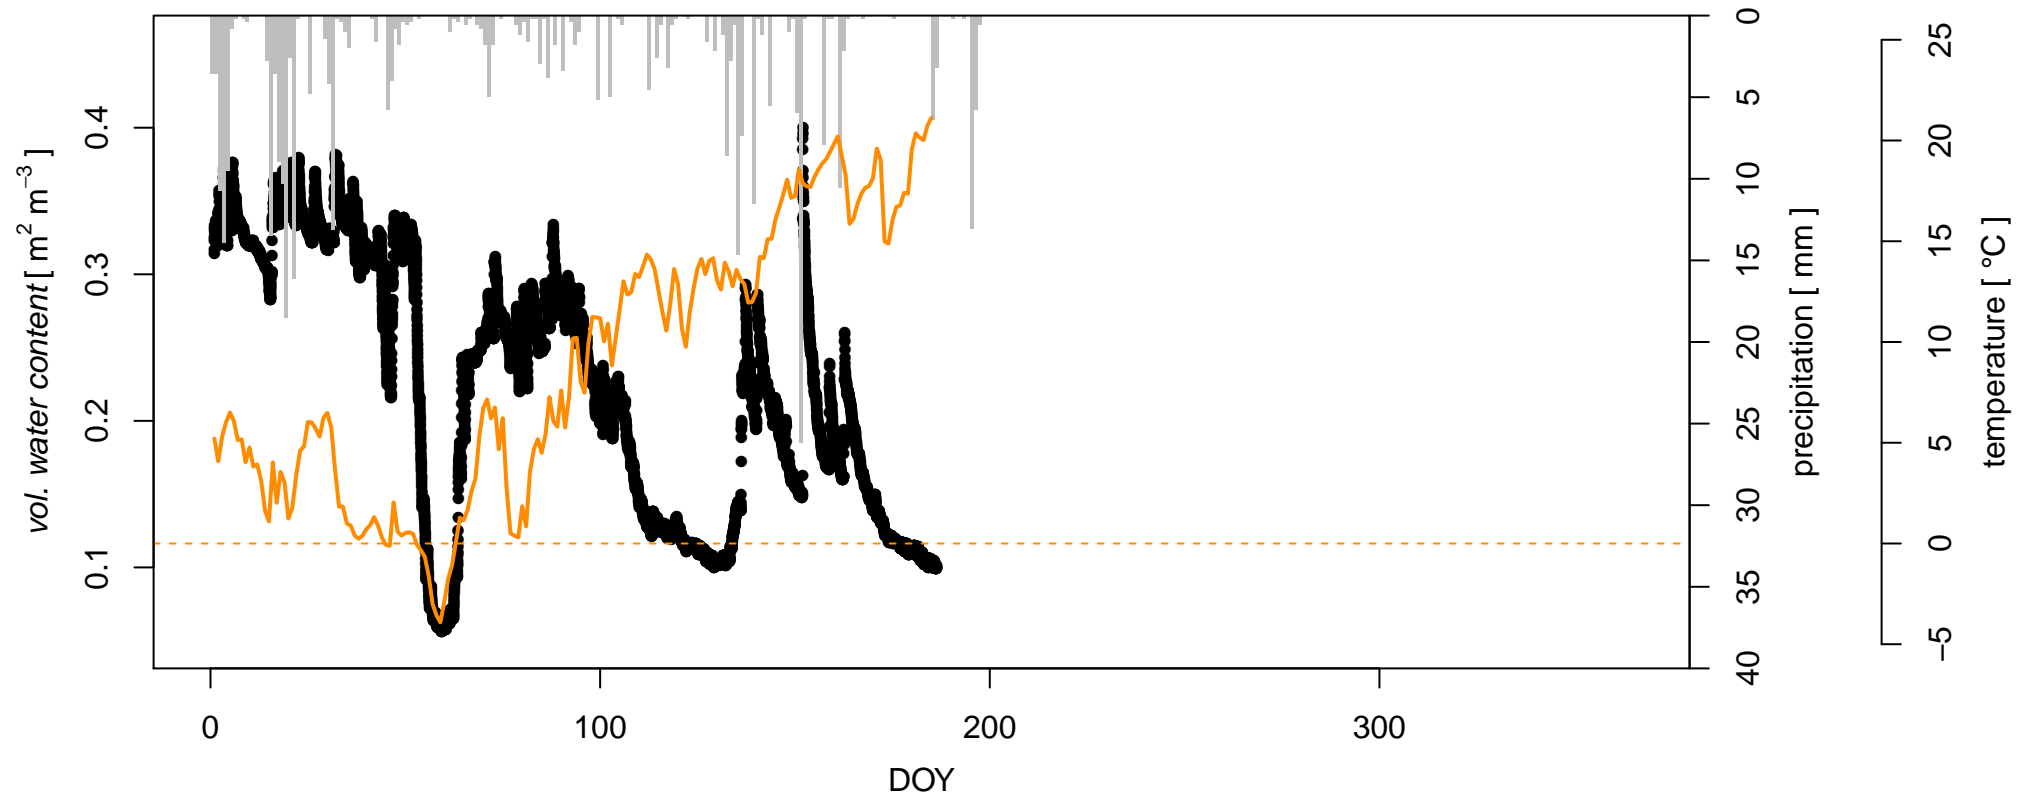

Supplement: Supplementary file 7 [file ec1vwc_5.pdf › ec1vwc_5.pdf]
