# Supplementary material for: Multi-site, multi-crop measurements in the soil–vegetation–atmosphere continuum: a comprehensive dataset from two climatically contrasting regions in southwestern Germany for the period 2009–2018
Source: Copernicus journal article supplement (doi:10.5194/essd-14-1153-2022), 2022-03-11

ec2 2010  
depth 75 cm

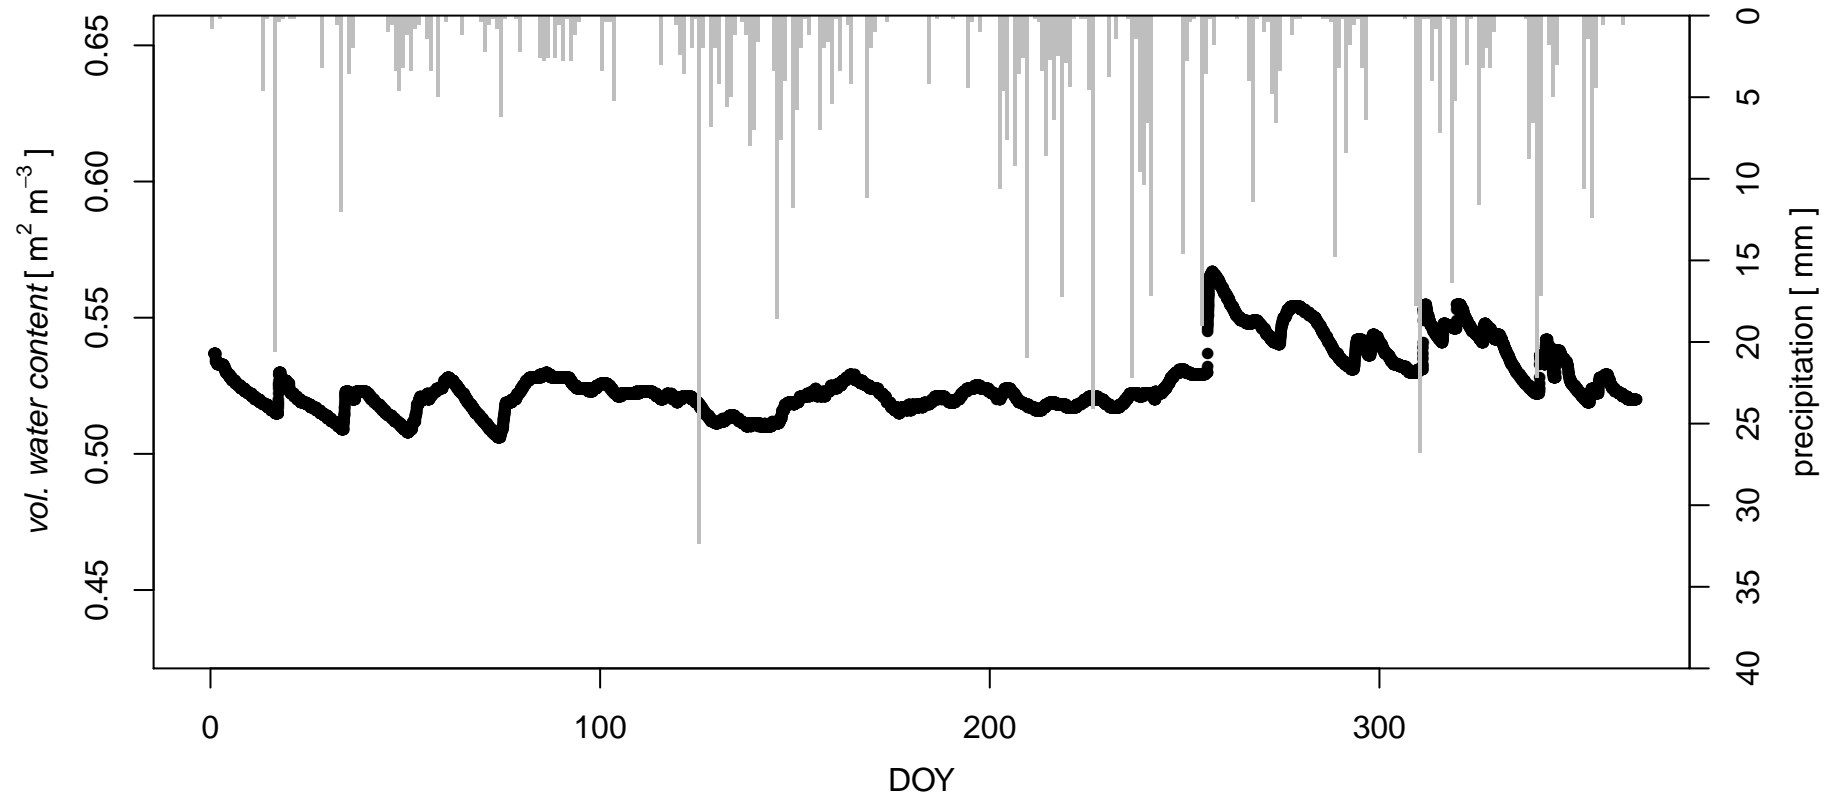

ec2 2011  
depth 75 cm

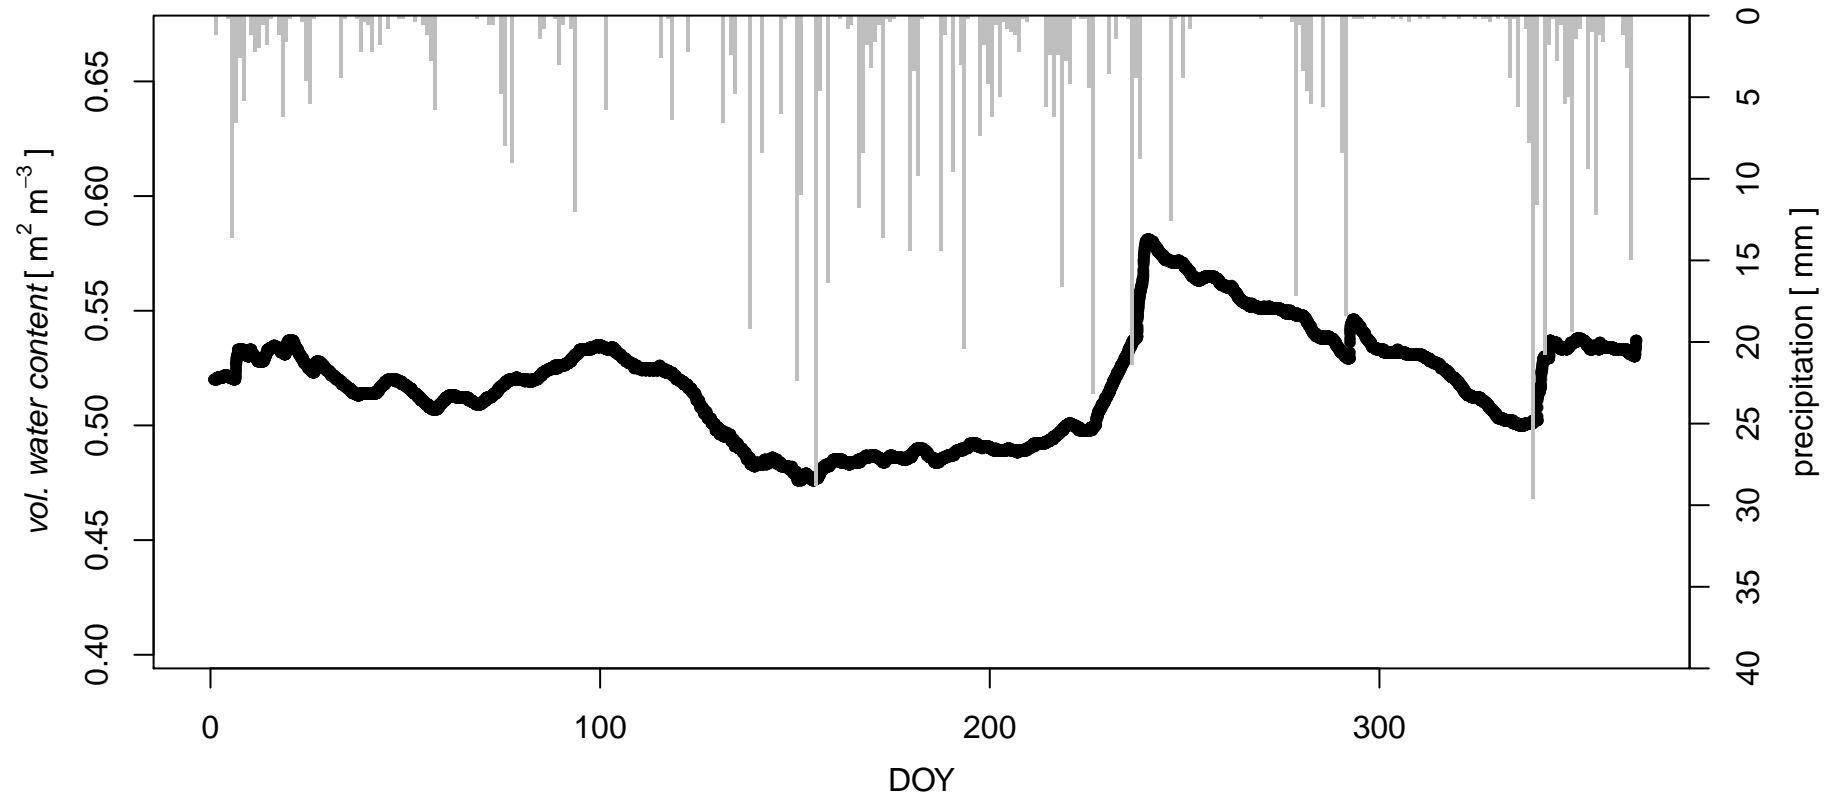

ec2 2012  
depth 75 cm

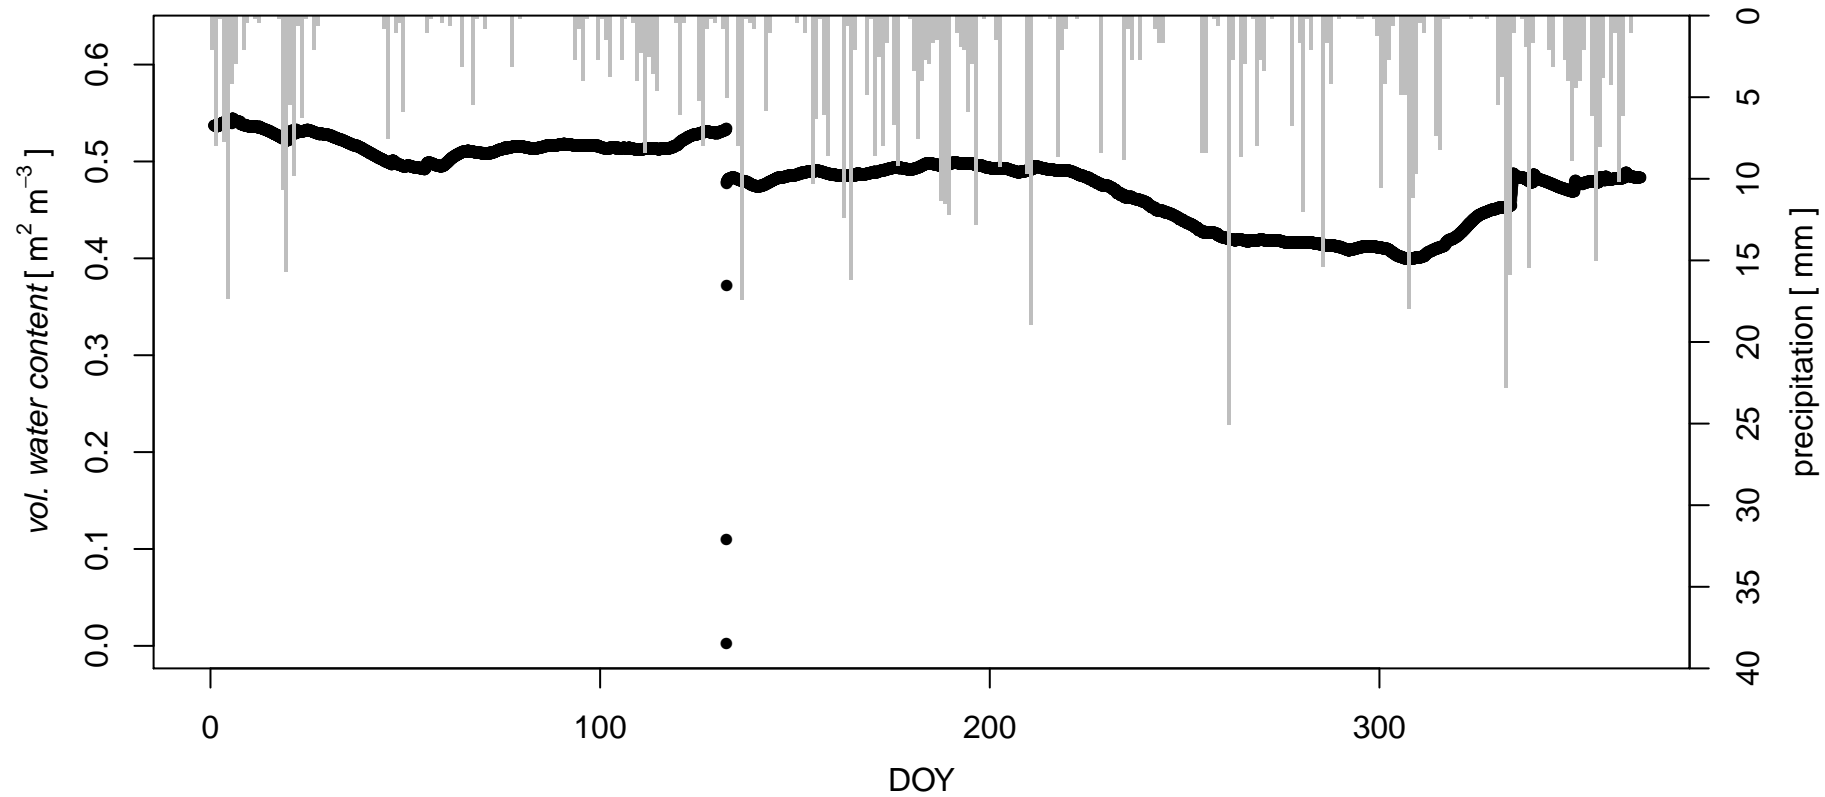

ec2 2013  
depth 75 cm

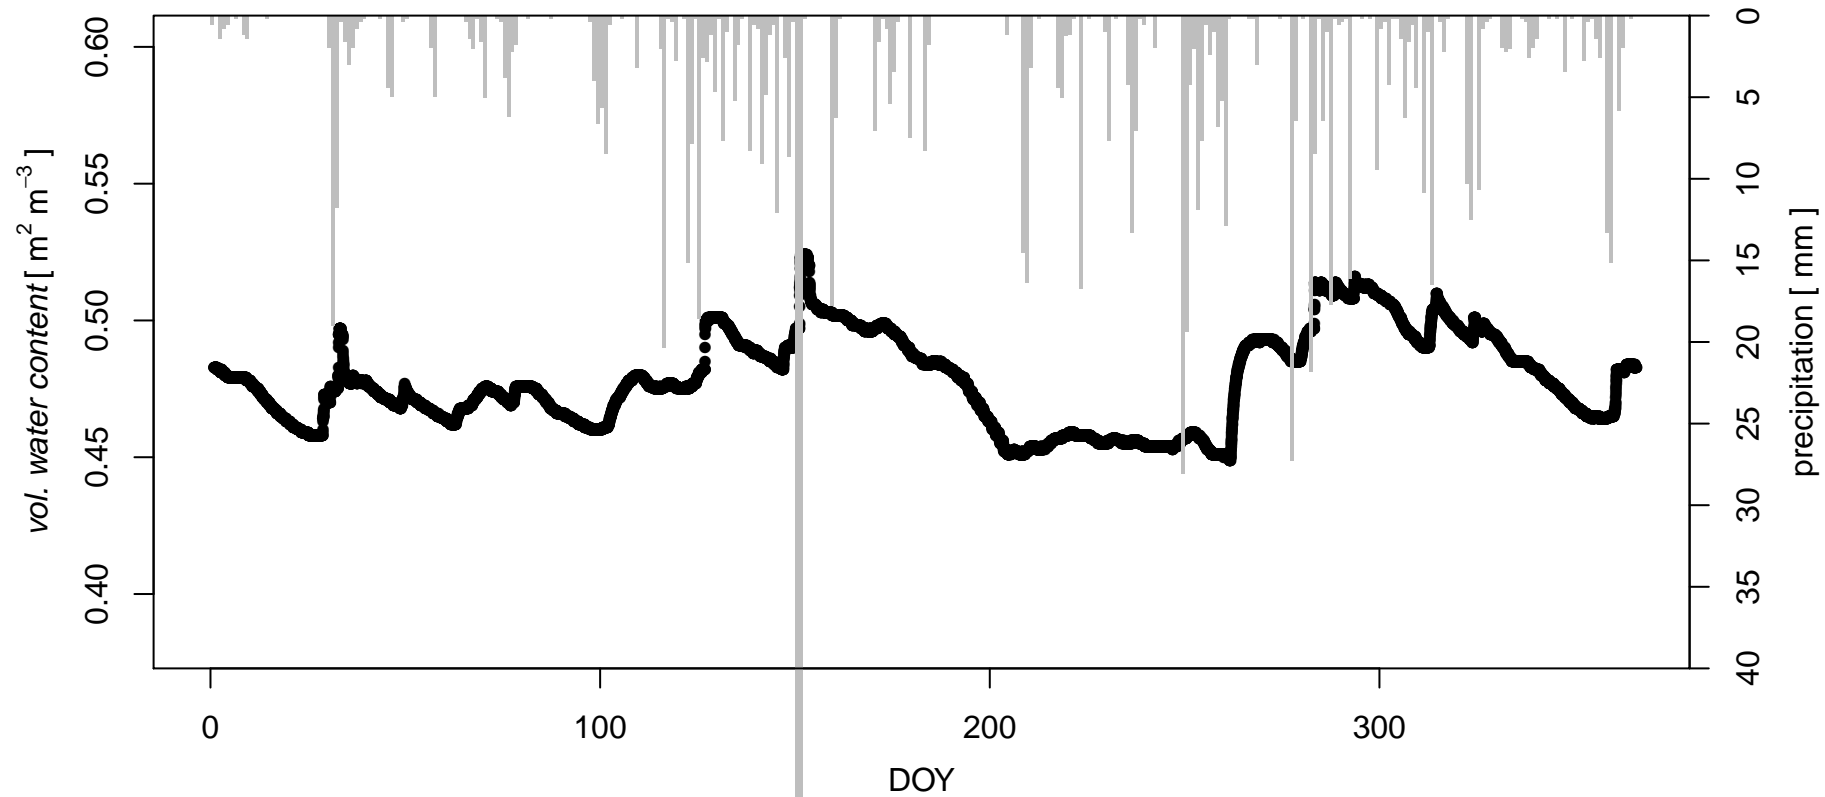

ec2 2014  
depth 75 cm

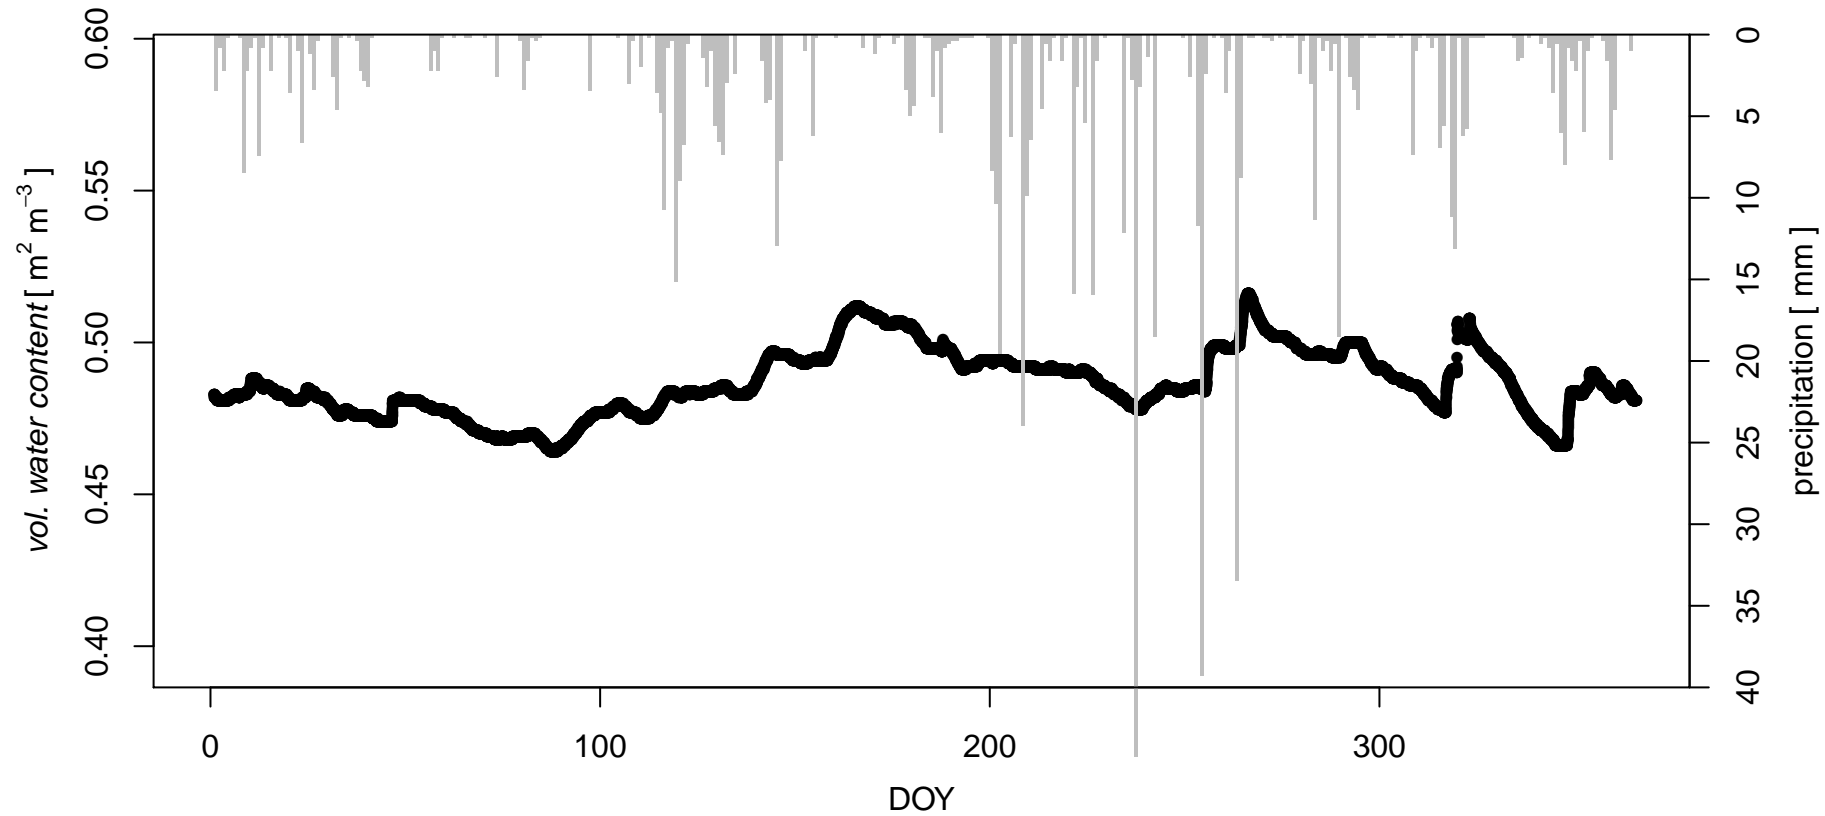

ec2 2015  
depth 75 cm

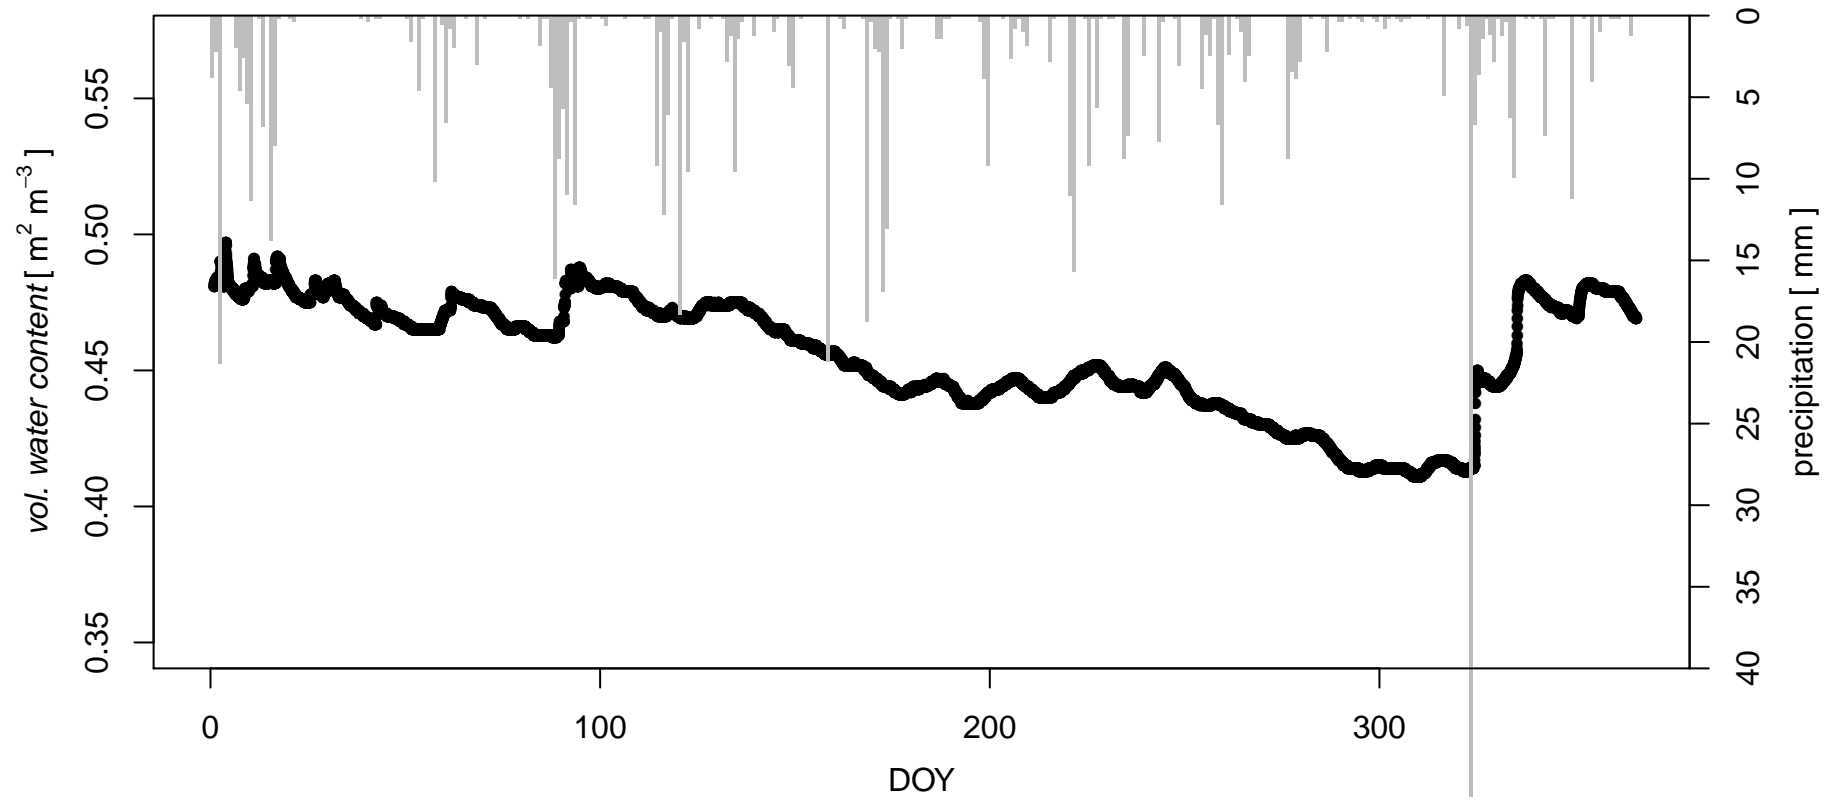

ec2 2016  
depth 75 cm

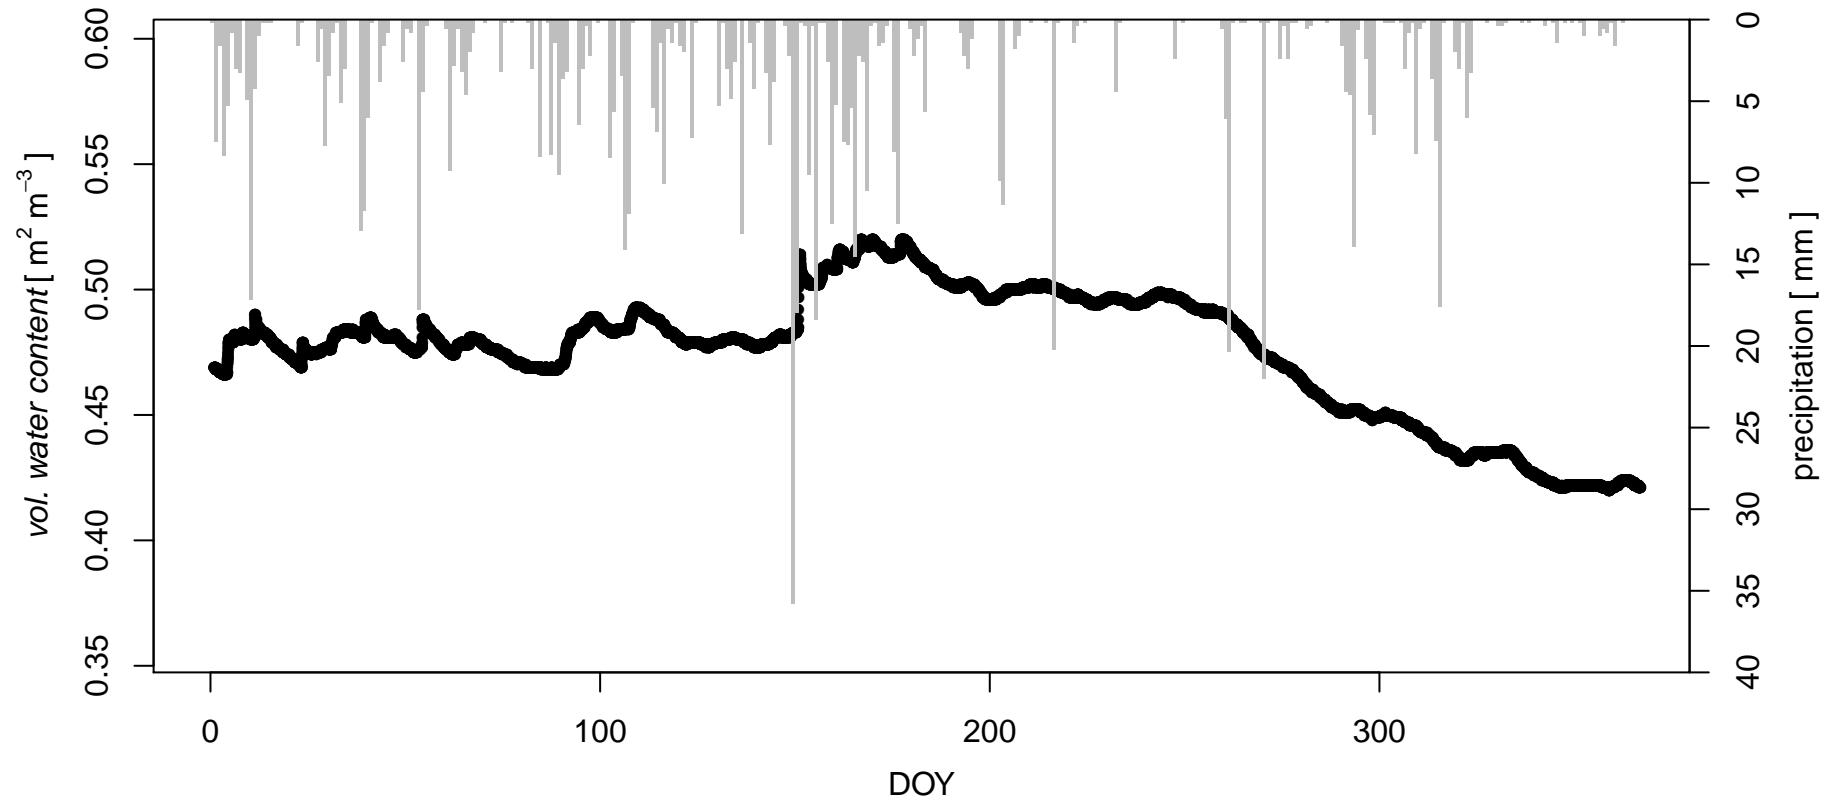

ec2 2017  
depth 75 cm

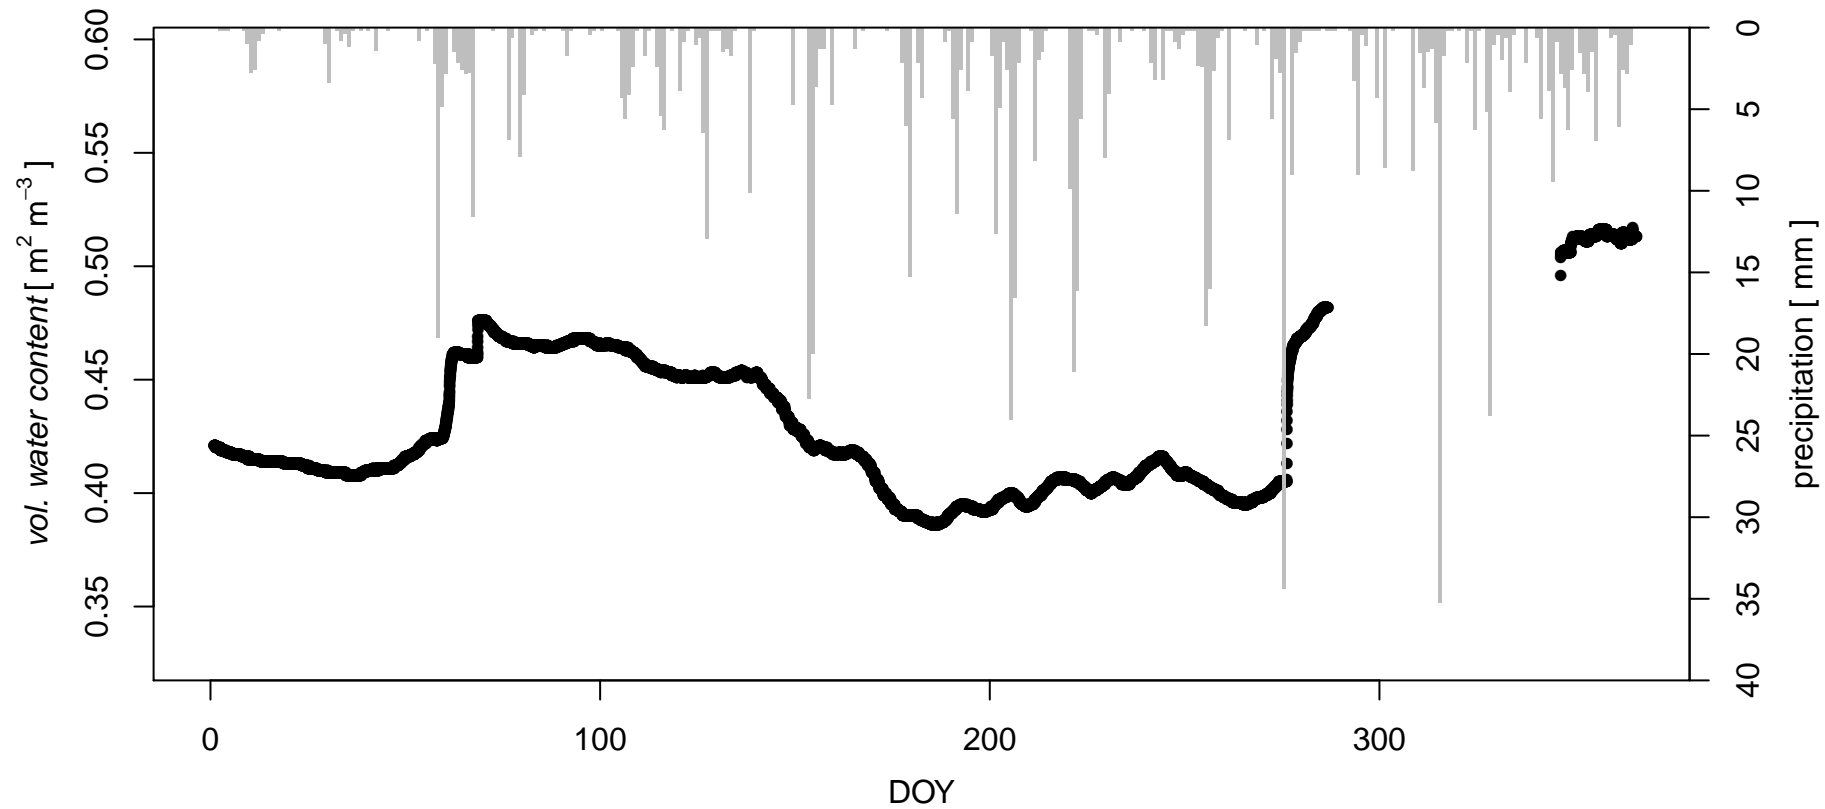

ec2 2018  
depth 75 cm

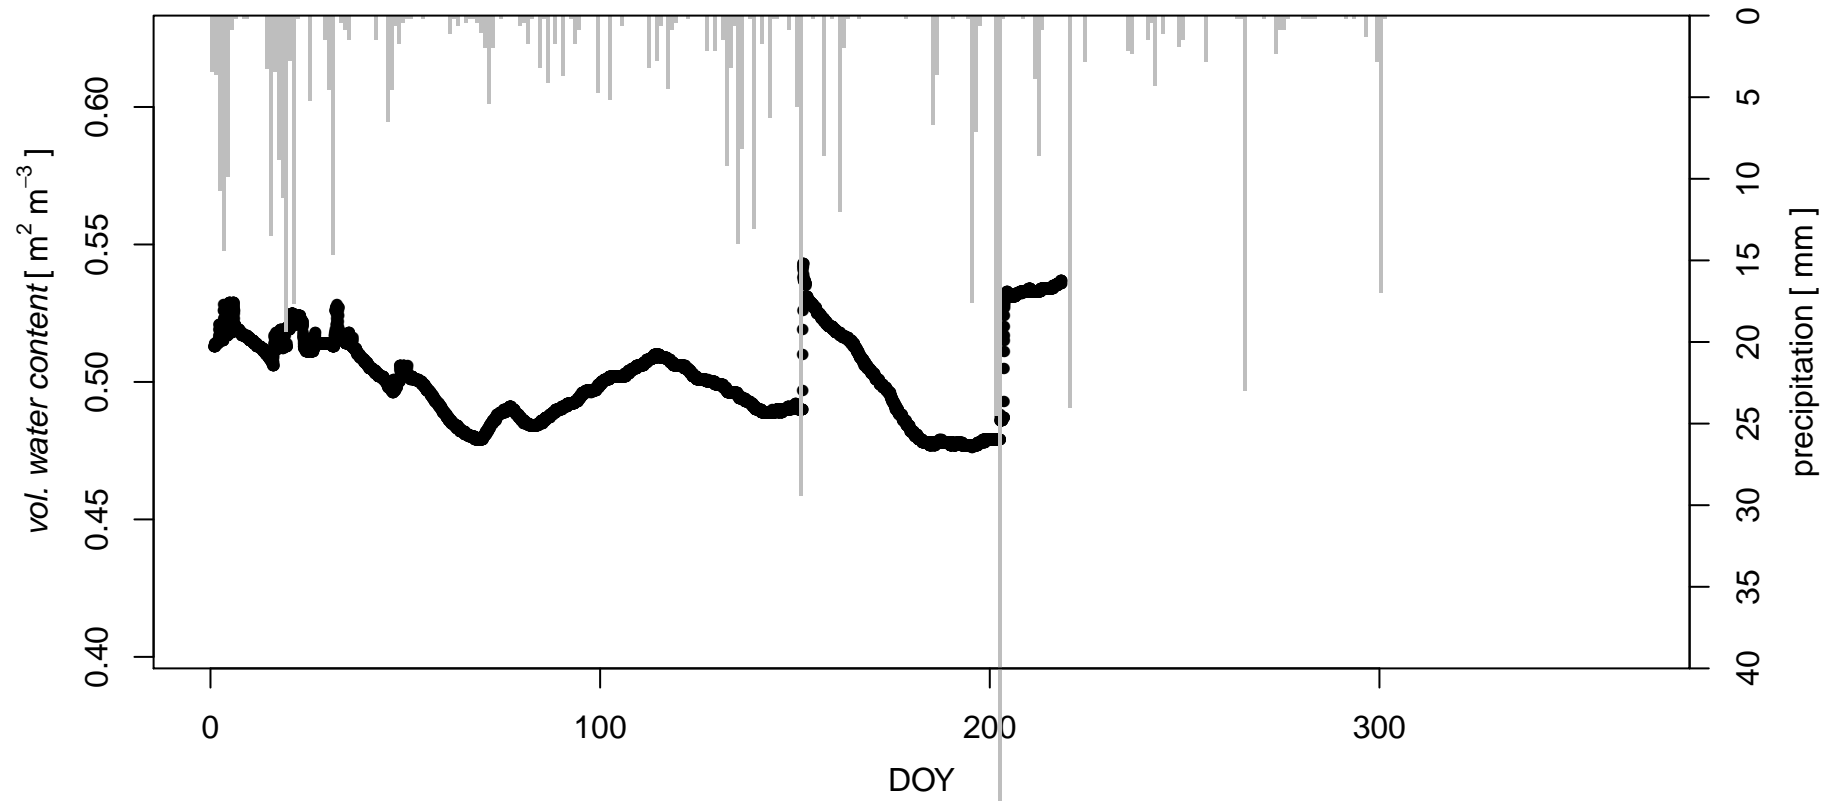

Supplement: Supplementary file 19 [file ec2vwc_75.pdf › ec2vwc_75.pdf]
