# Supplementary material for: Multi-site, multi-crop measurements in the soil–vegetation–atmosphere continuum: a comprehensive dataset from two climatically contrasting regions in southwestern Germany for the period 2009–2018
Source: Copernicus journal article supplement (doi:10.5194/essd-14-1153-2022), 2022-03-11

ec3 2010  
depth 15 cm

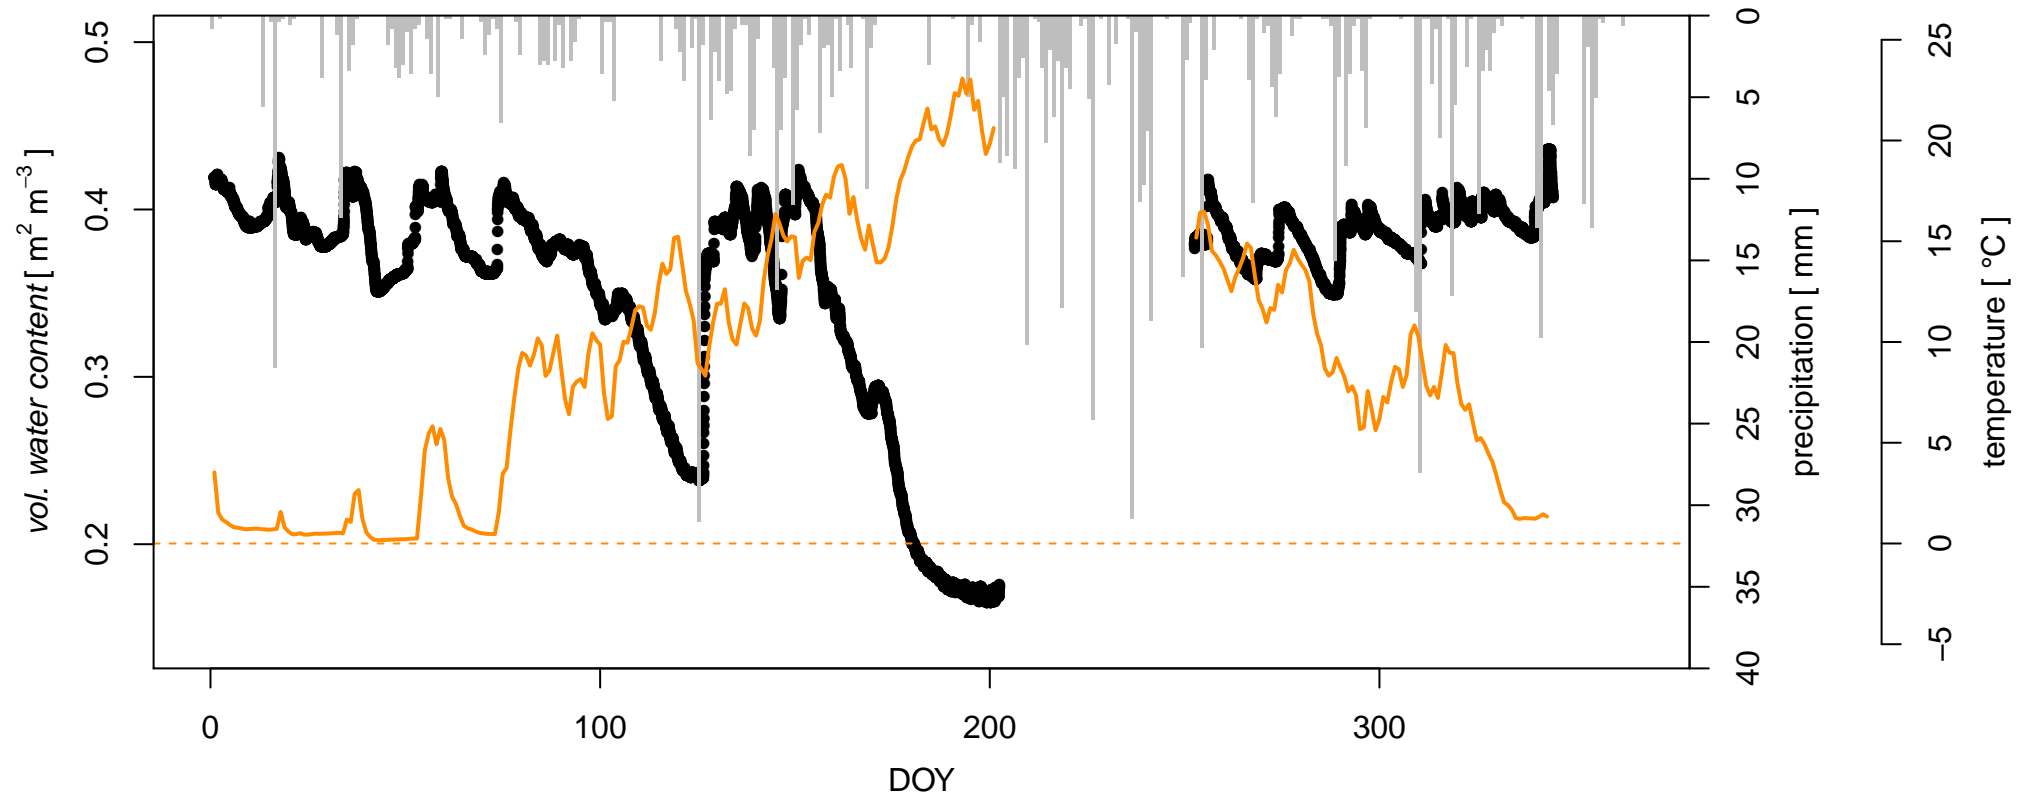

ec3 2011  
depth 15 cm

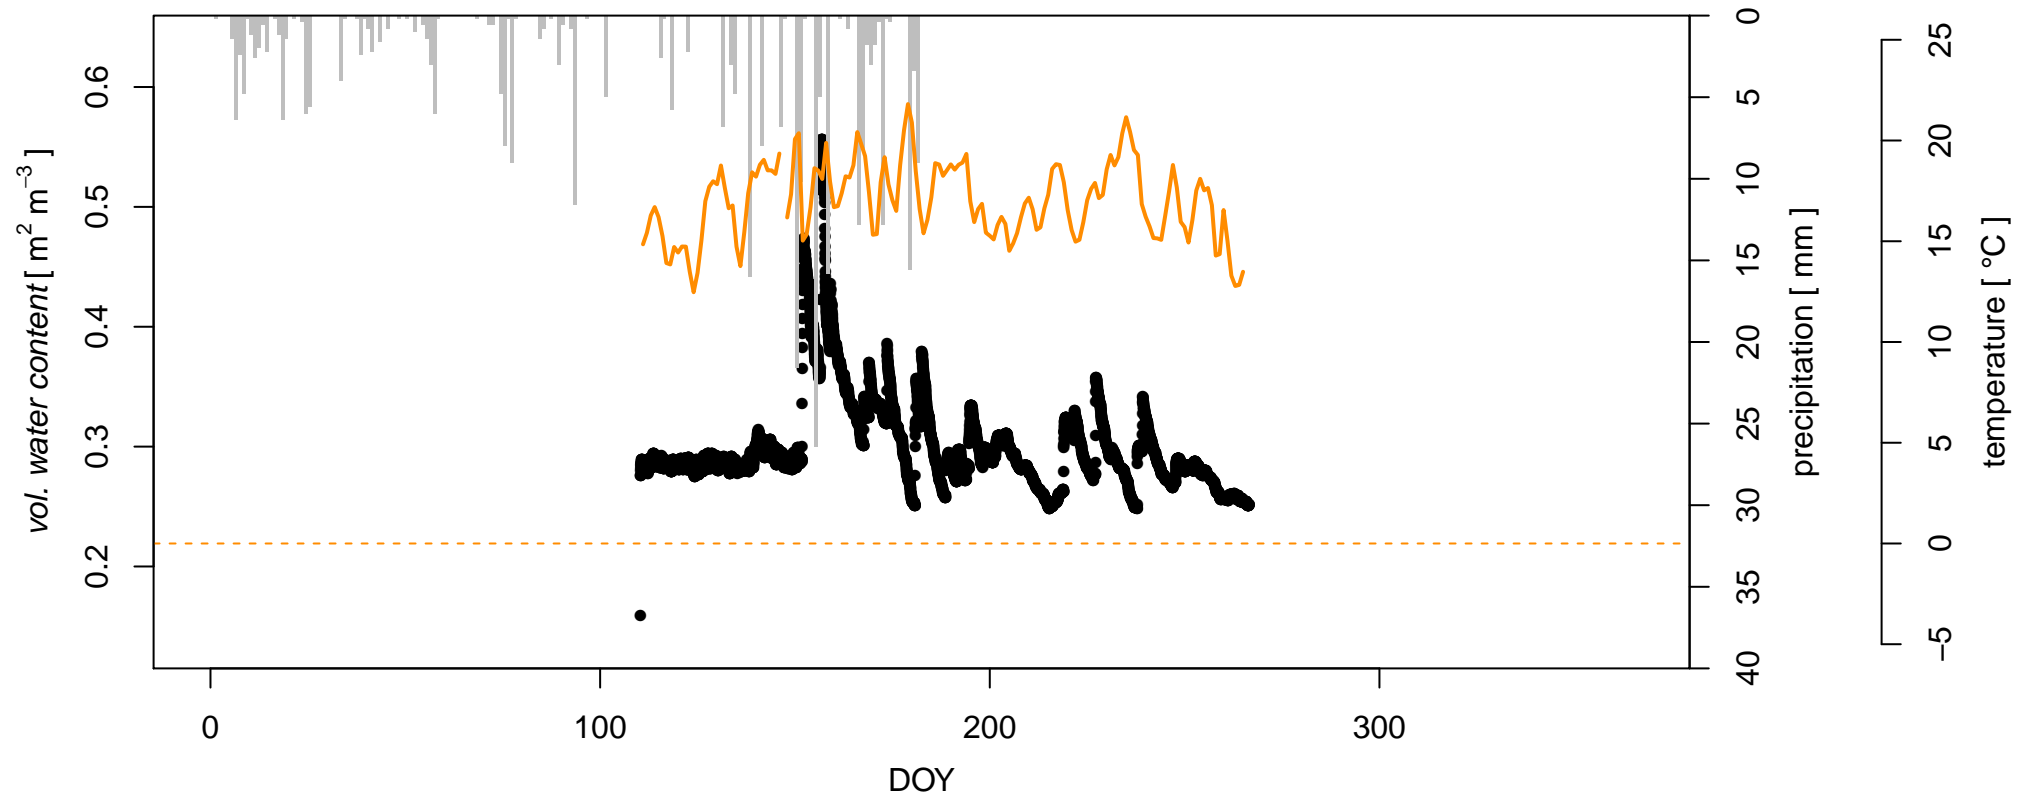

ec3 2012  
depth 15 cm

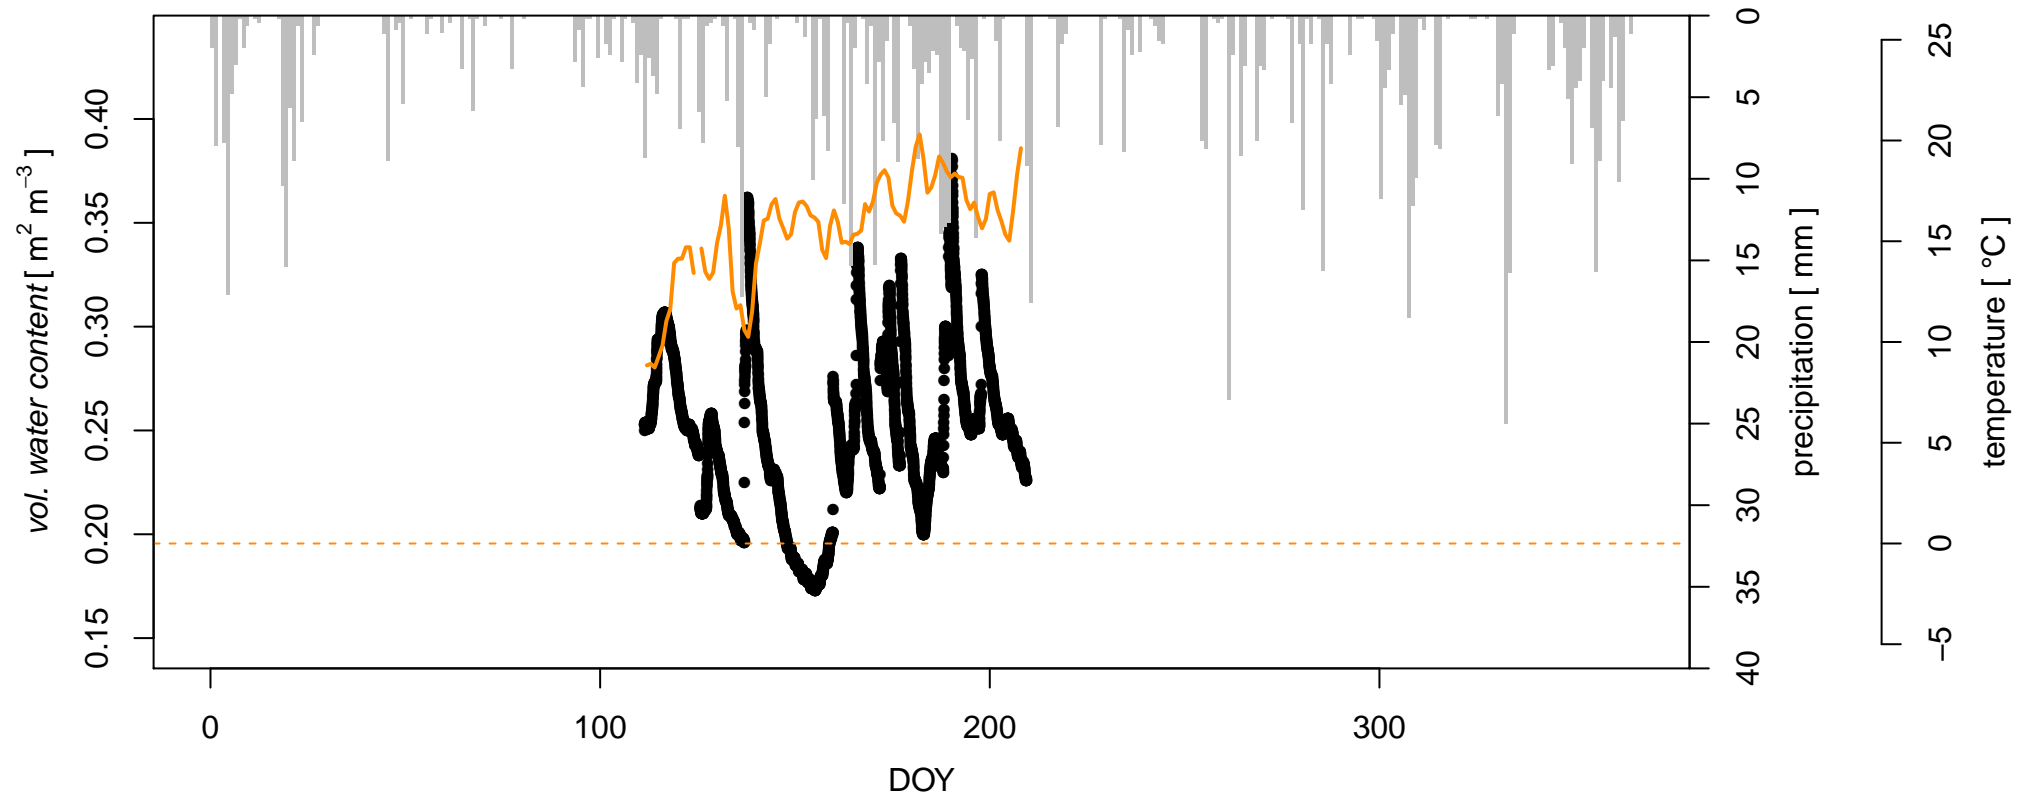

ec3 2013  
depth 15 cm

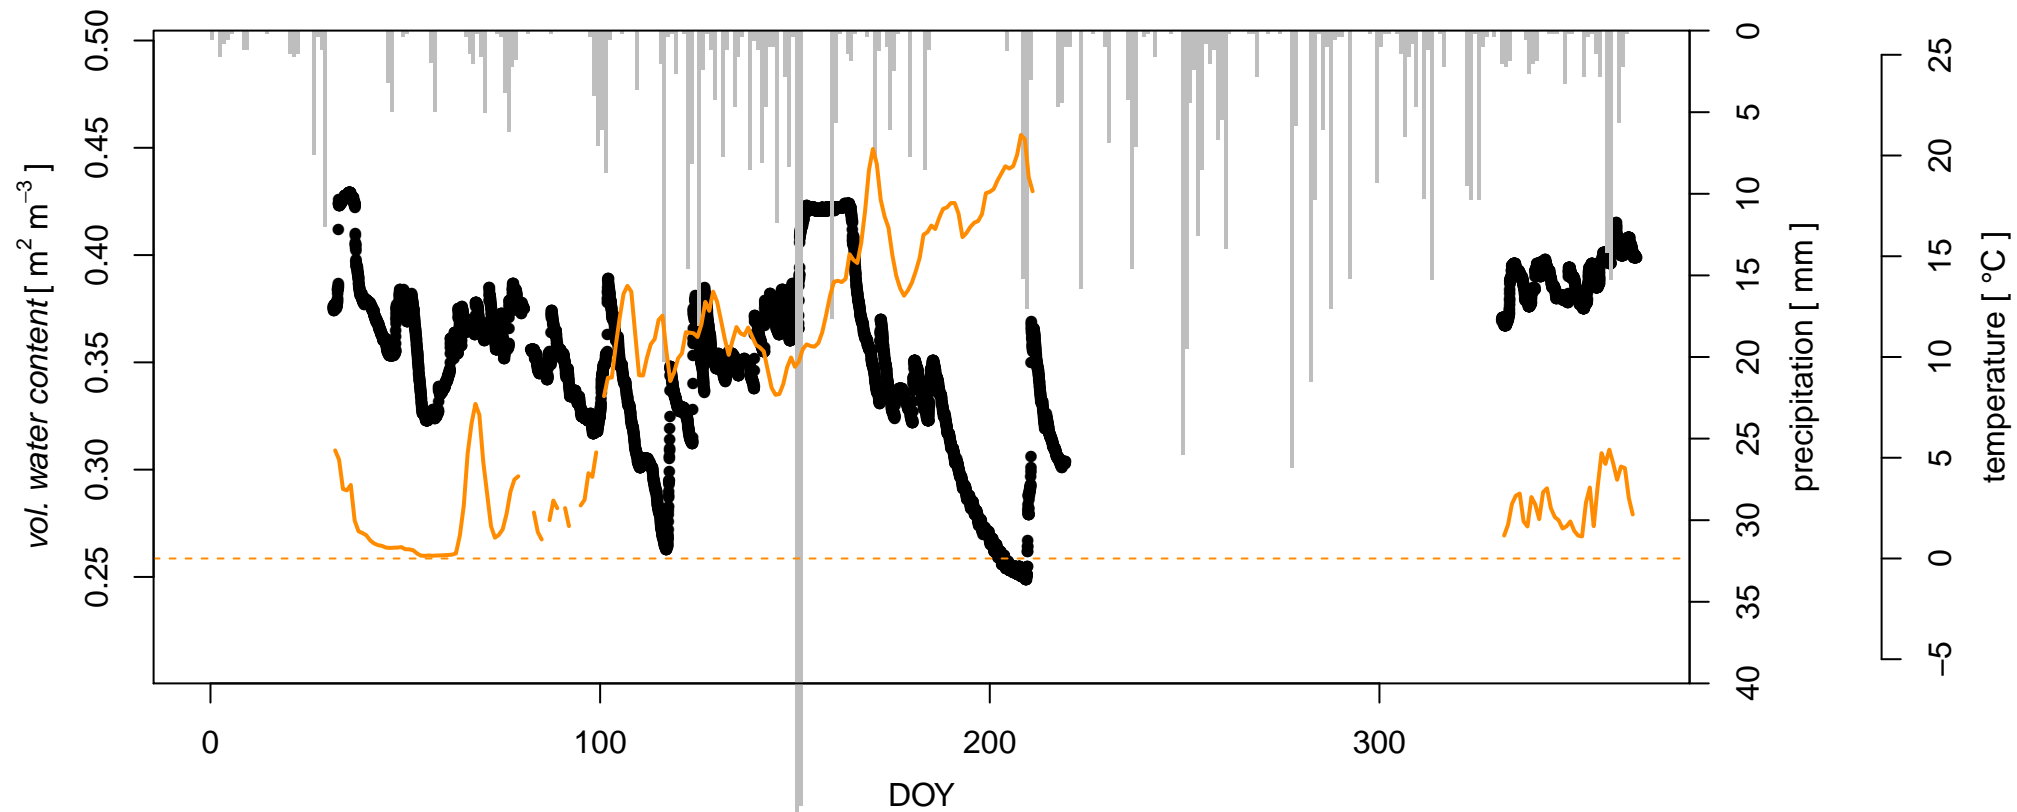

ec3 2014  
depth 15 cm

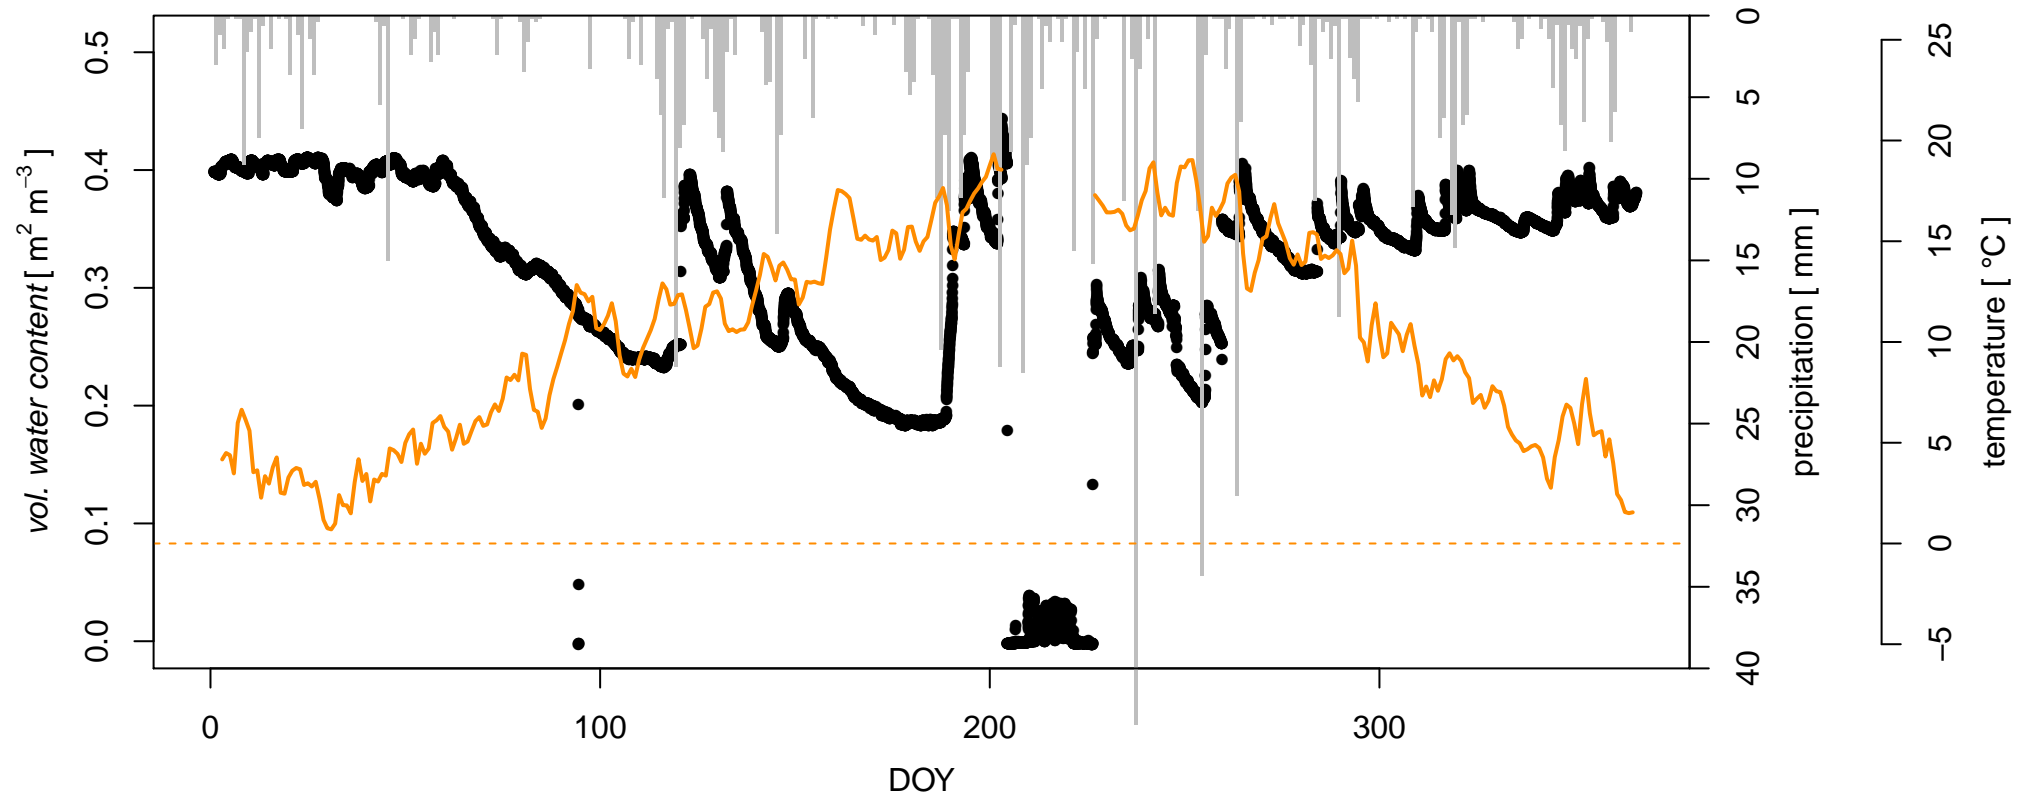

ec3 2015  
depth 15 cm

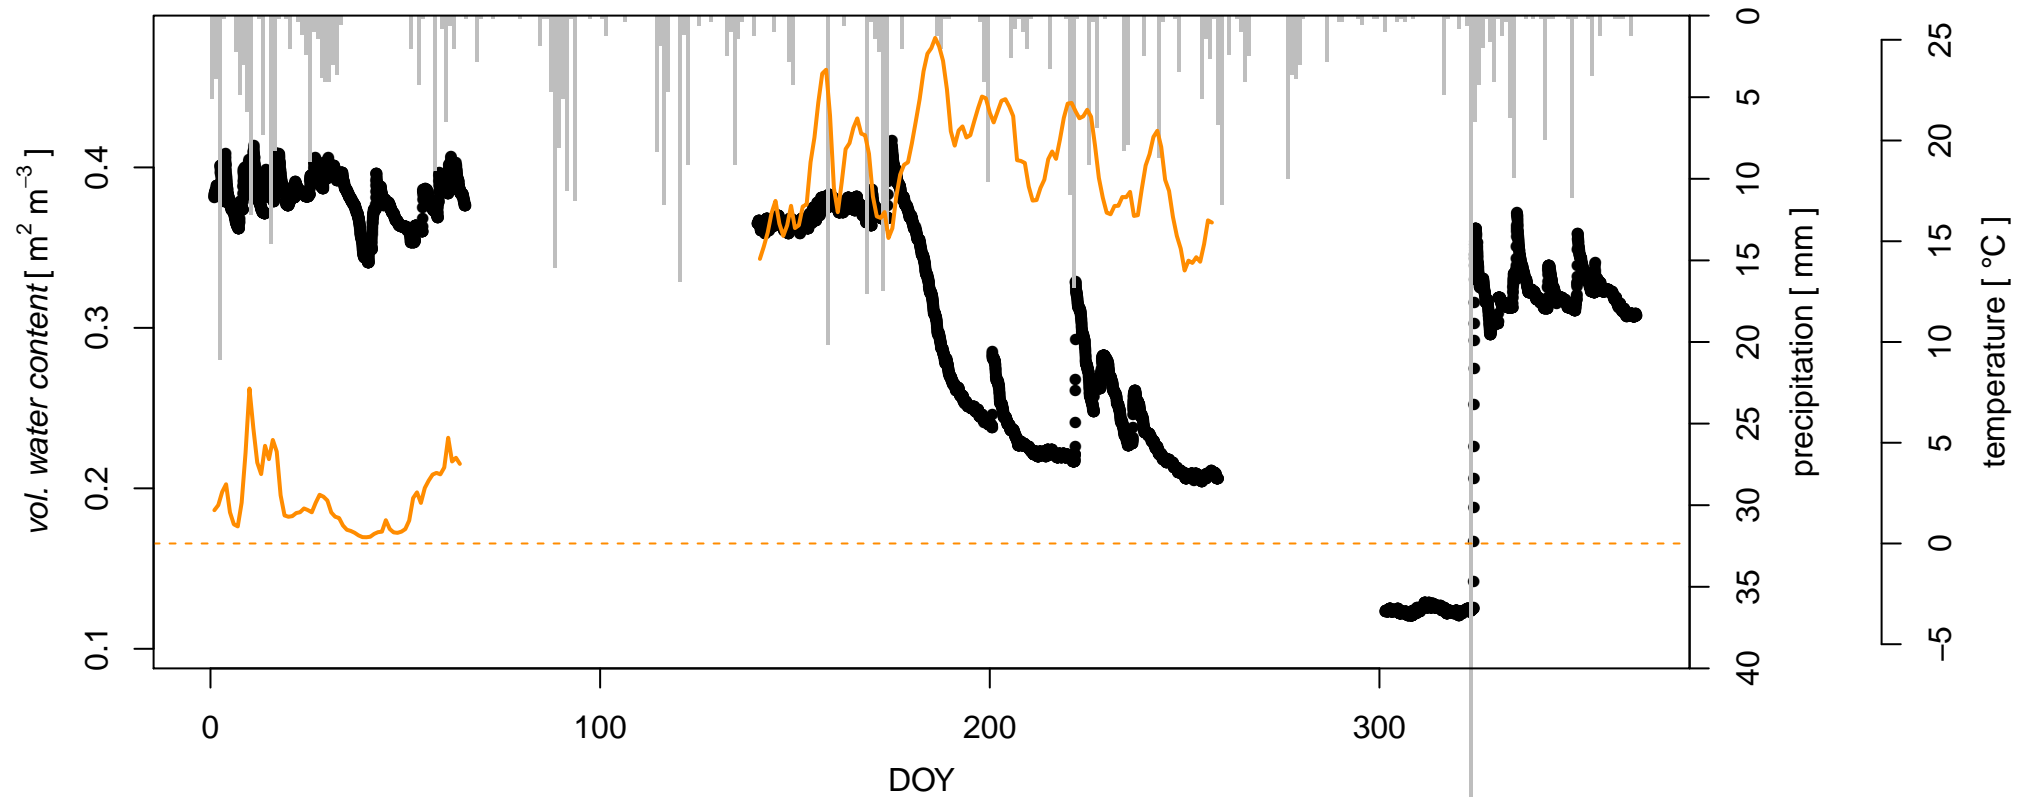

ec3 2016  
depth 15 cm

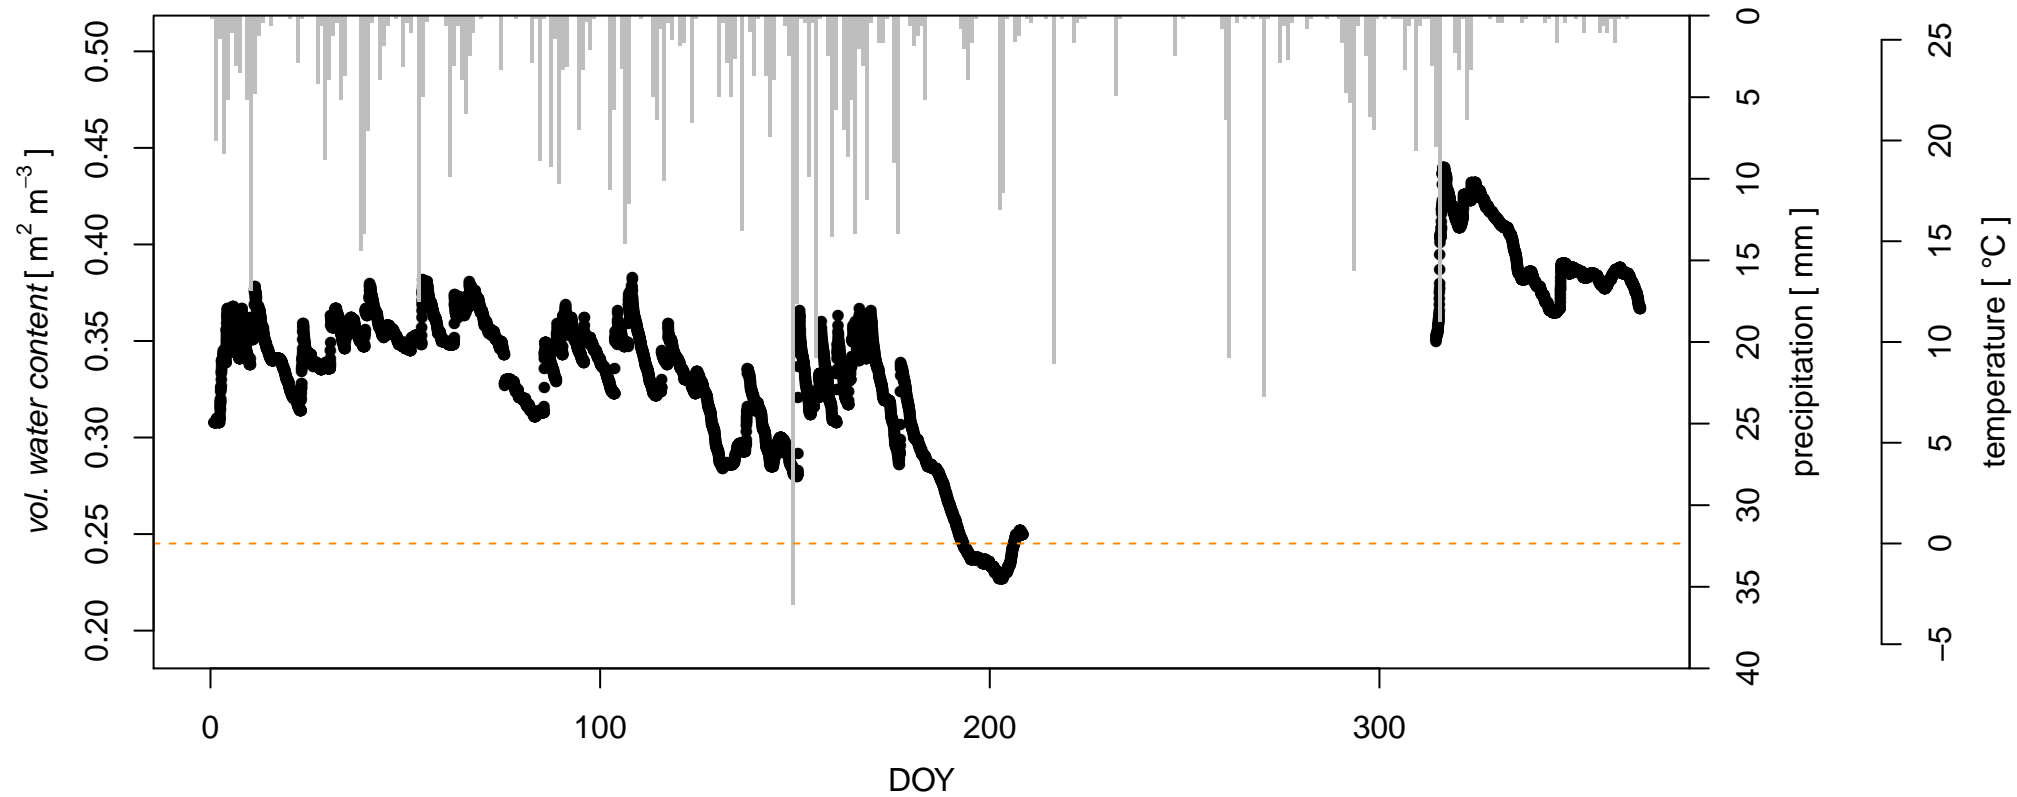

ec3 2017  
depth 15 cm

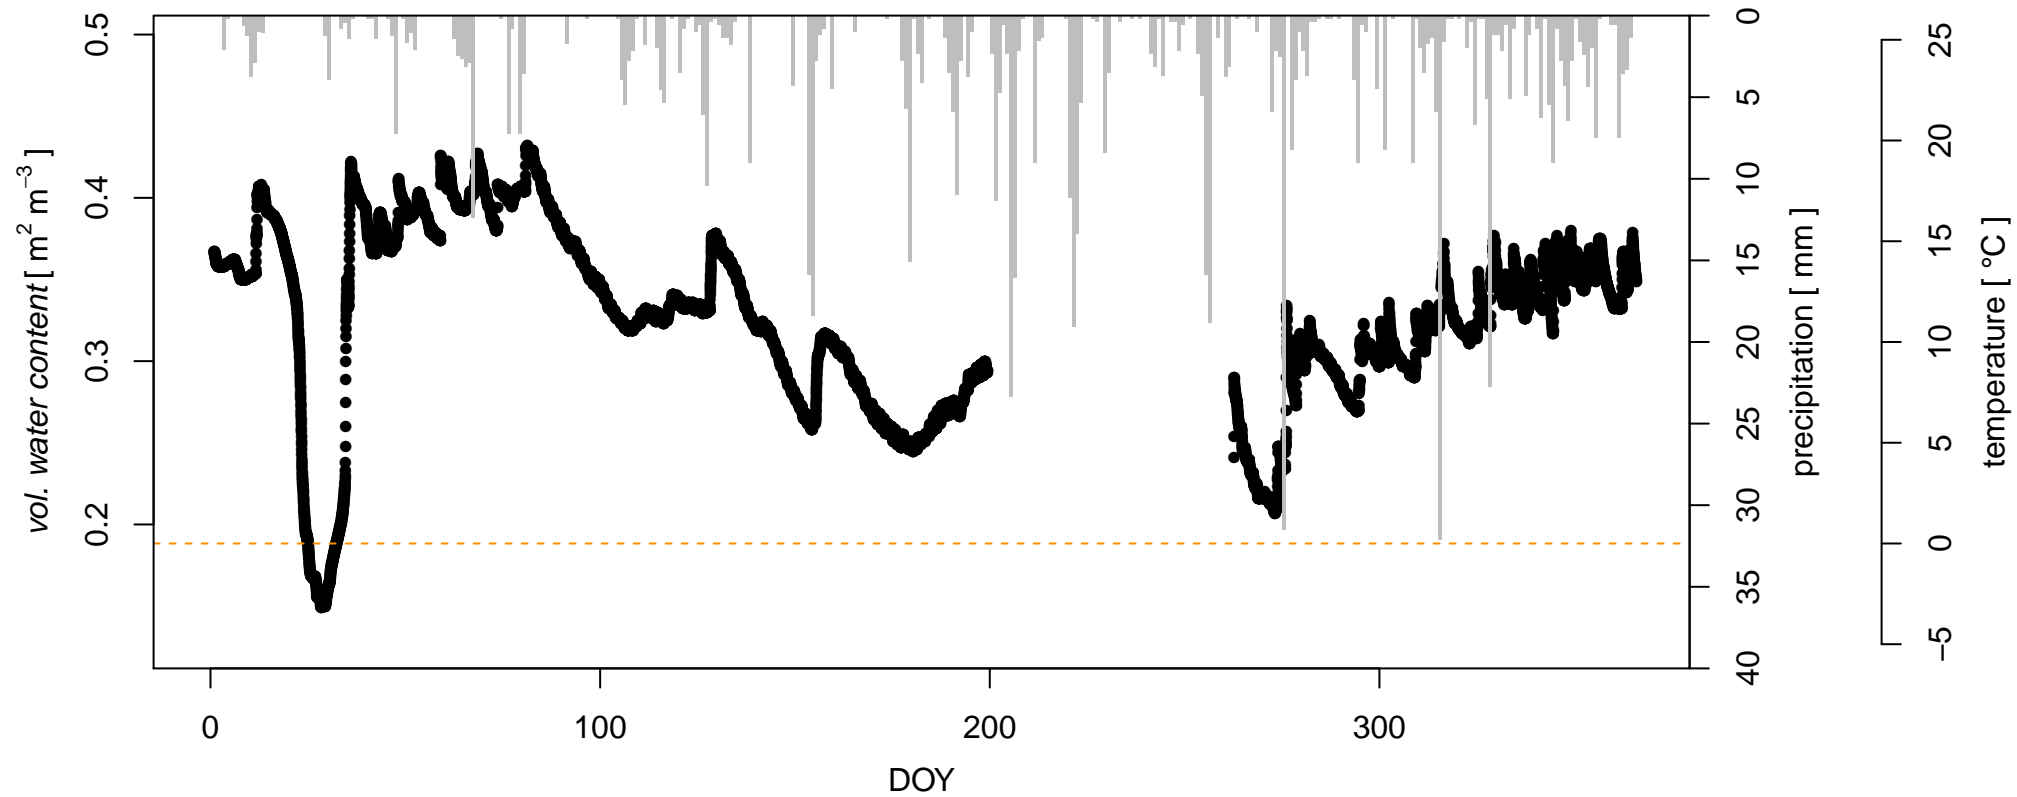

ec3 2018  
depth 15 cm

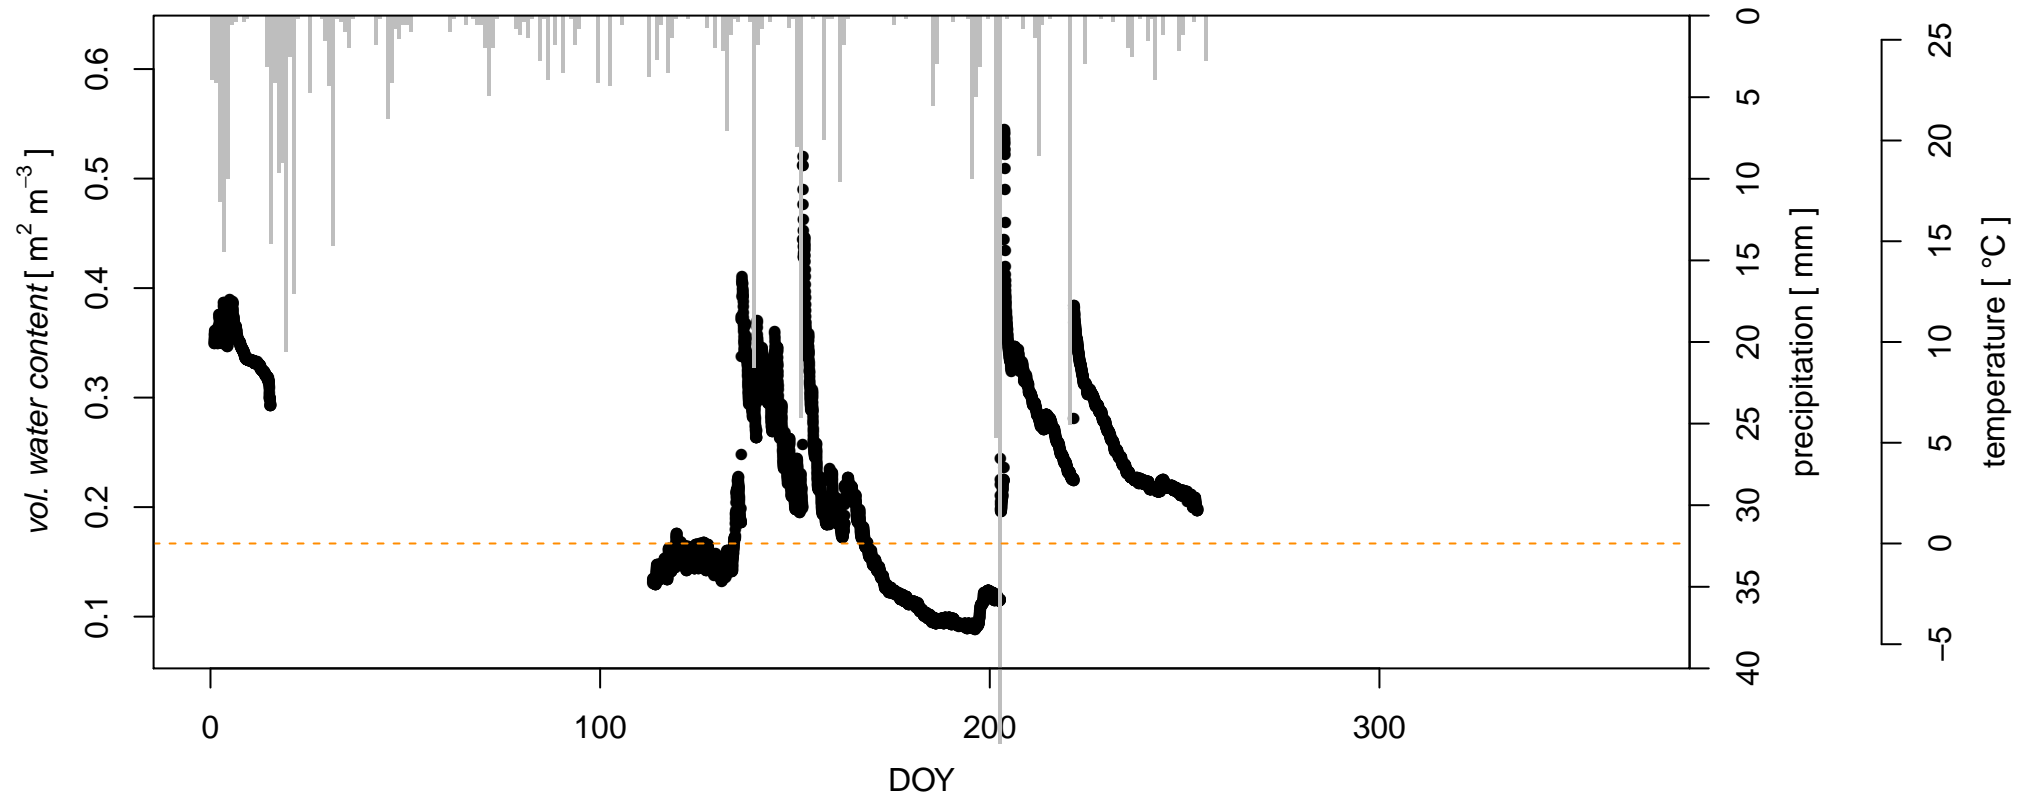

Supplement: Supplementary file 21 [file ec3vwc_15.pdf › ec3vwc_15.pdf]
