# Supplementary material for: Multi-site, multi-crop measurements in the soil–vegetation–atmosphere continuum: a comprehensive dataset from two climatically contrasting regions in southwestern Germany for the period 2009–2018
Source: Copernicus journal article supplement (doi:10.5194/essd-14-1153-2022), 2022-03-11

ec5 2010  
depth 30 cm

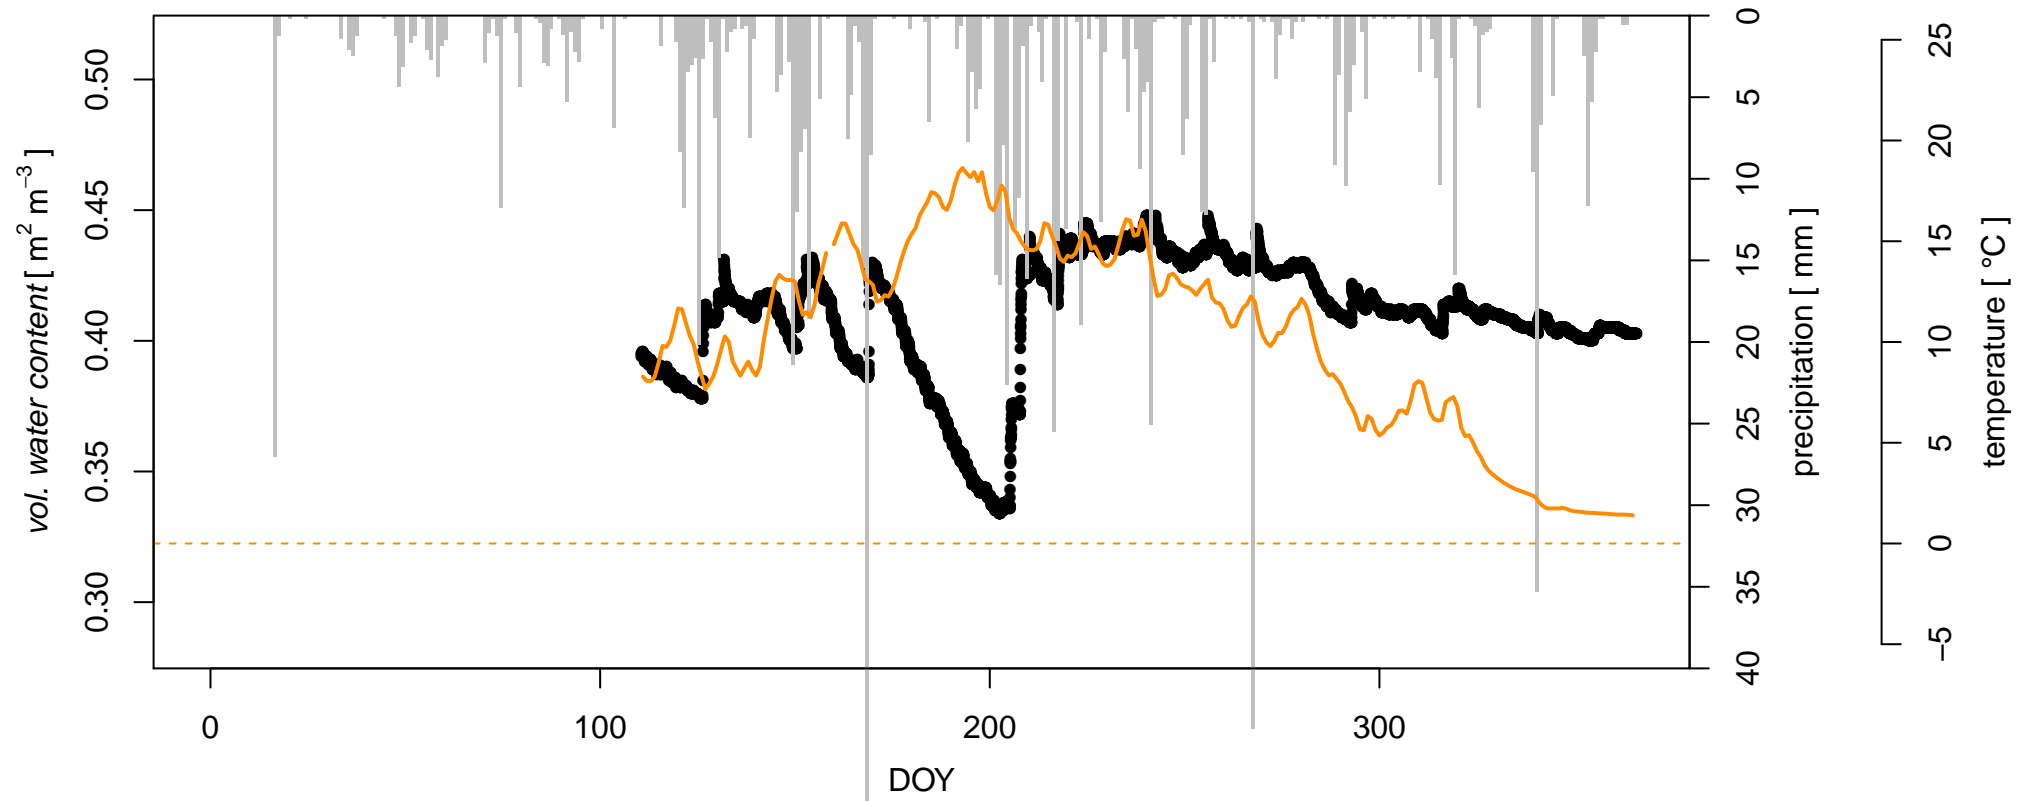

ec5 2011  
depth 30 cm

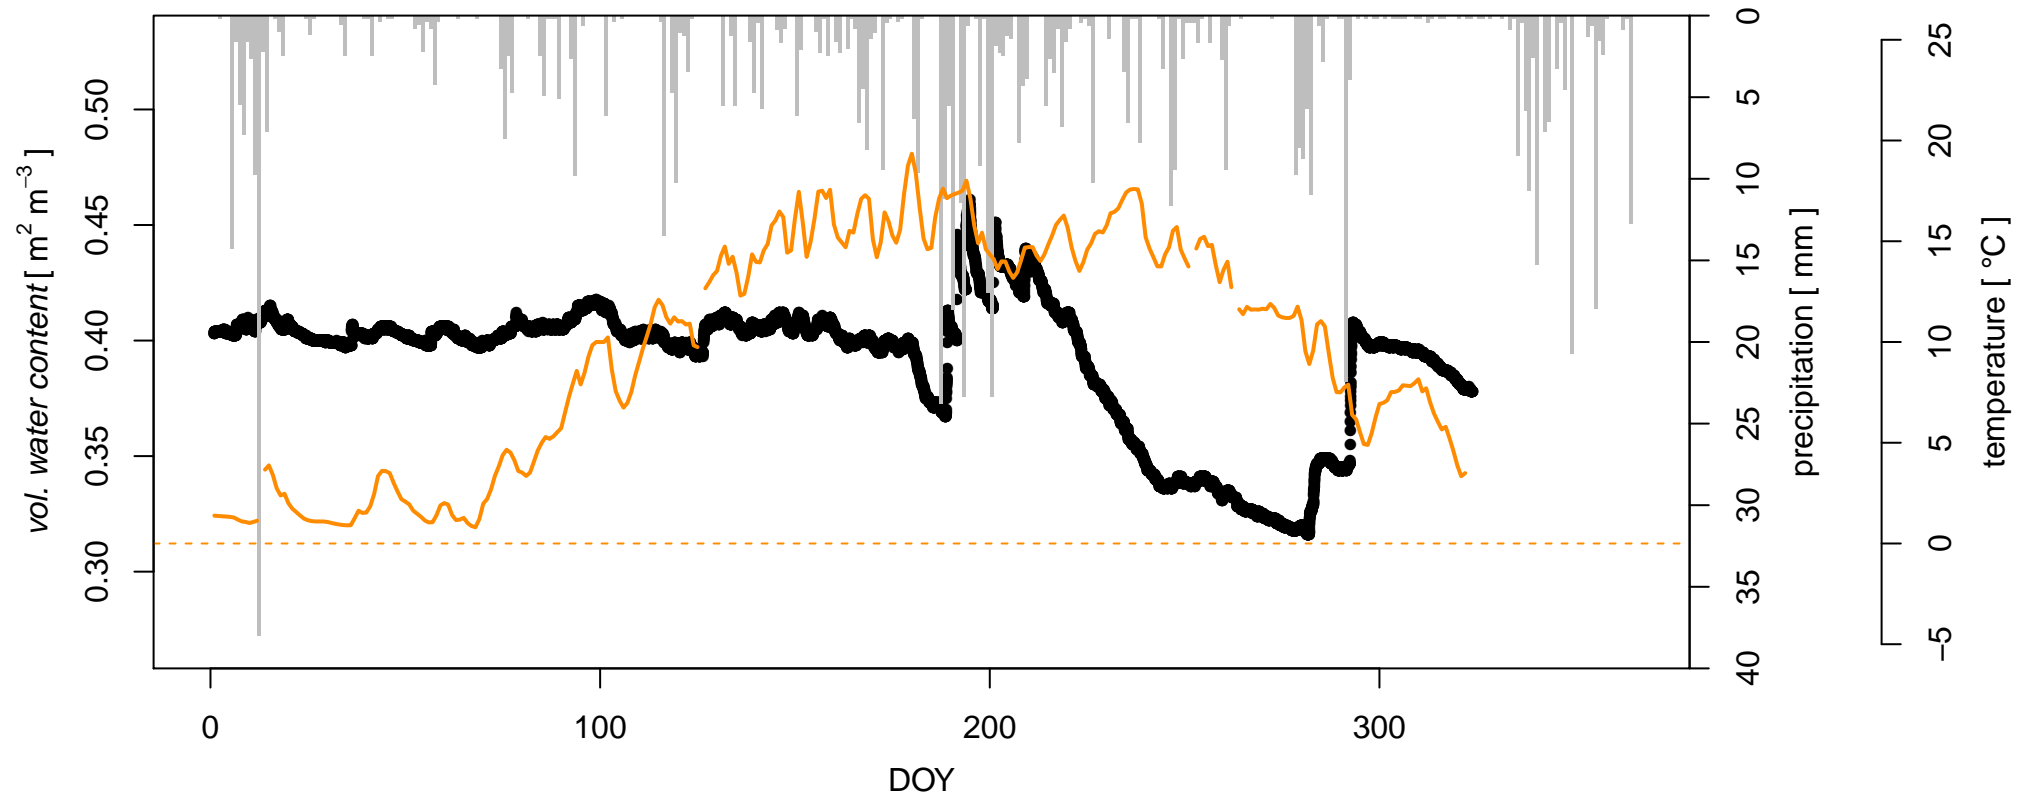

ec5 2012  
depth 30 cm

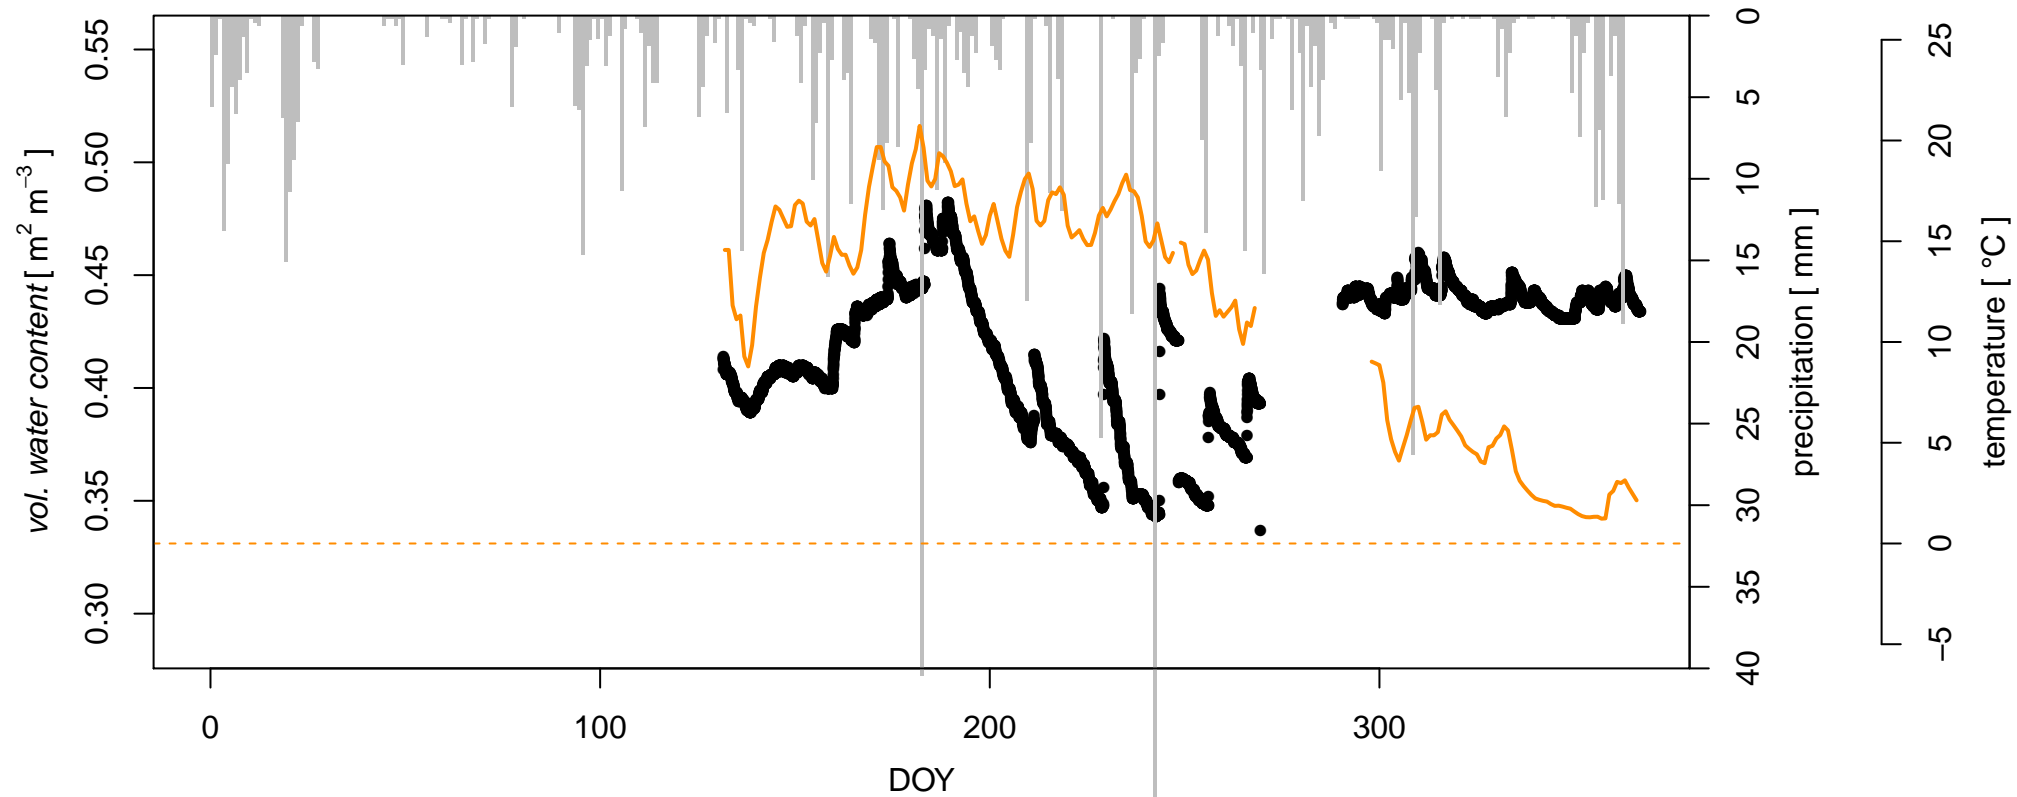

ec5 2013  
depth 30 cm

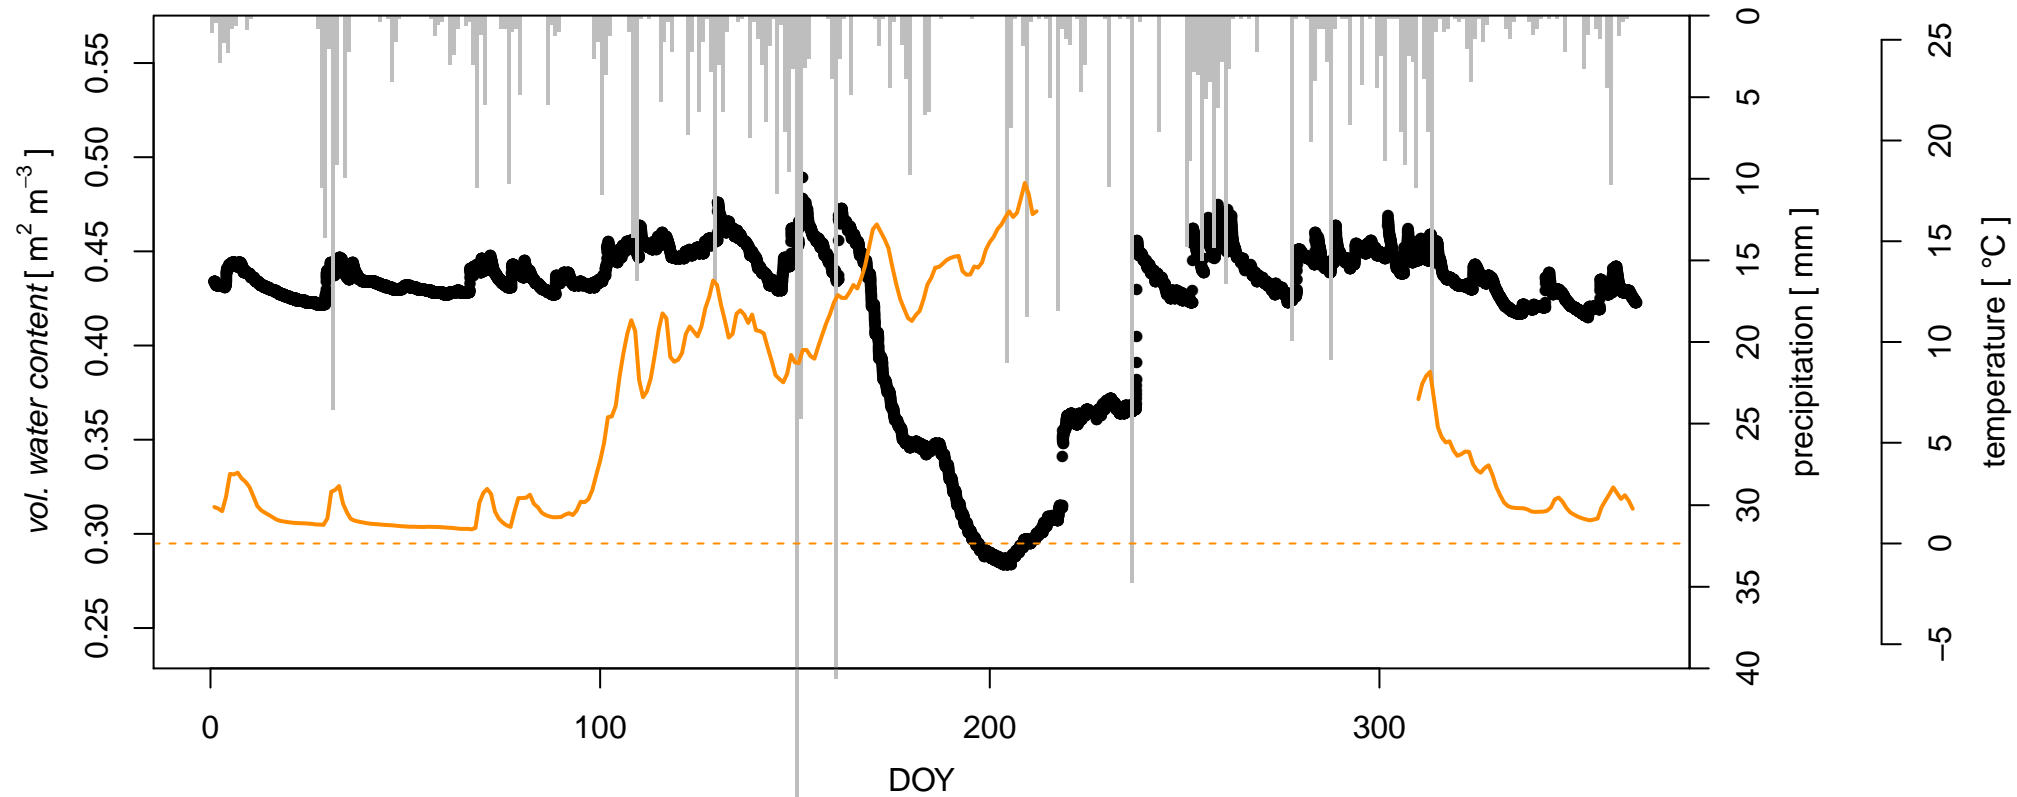

ec5 2014  
depth 30 cm

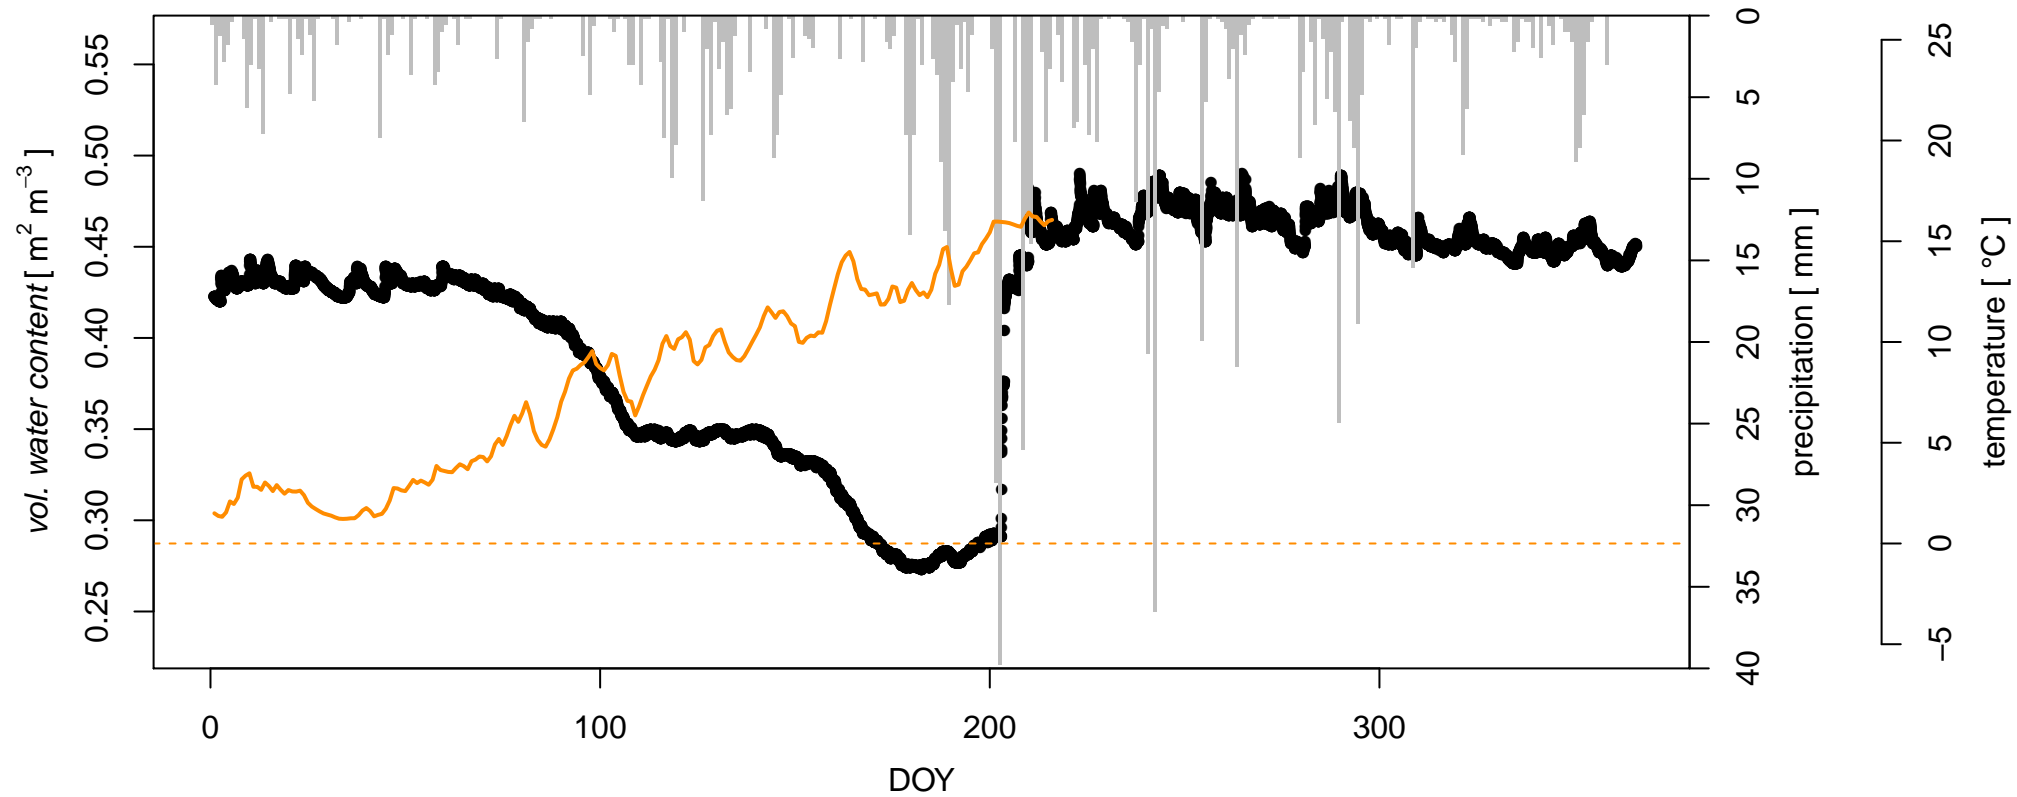

ec5 2015  
depth 30 cm

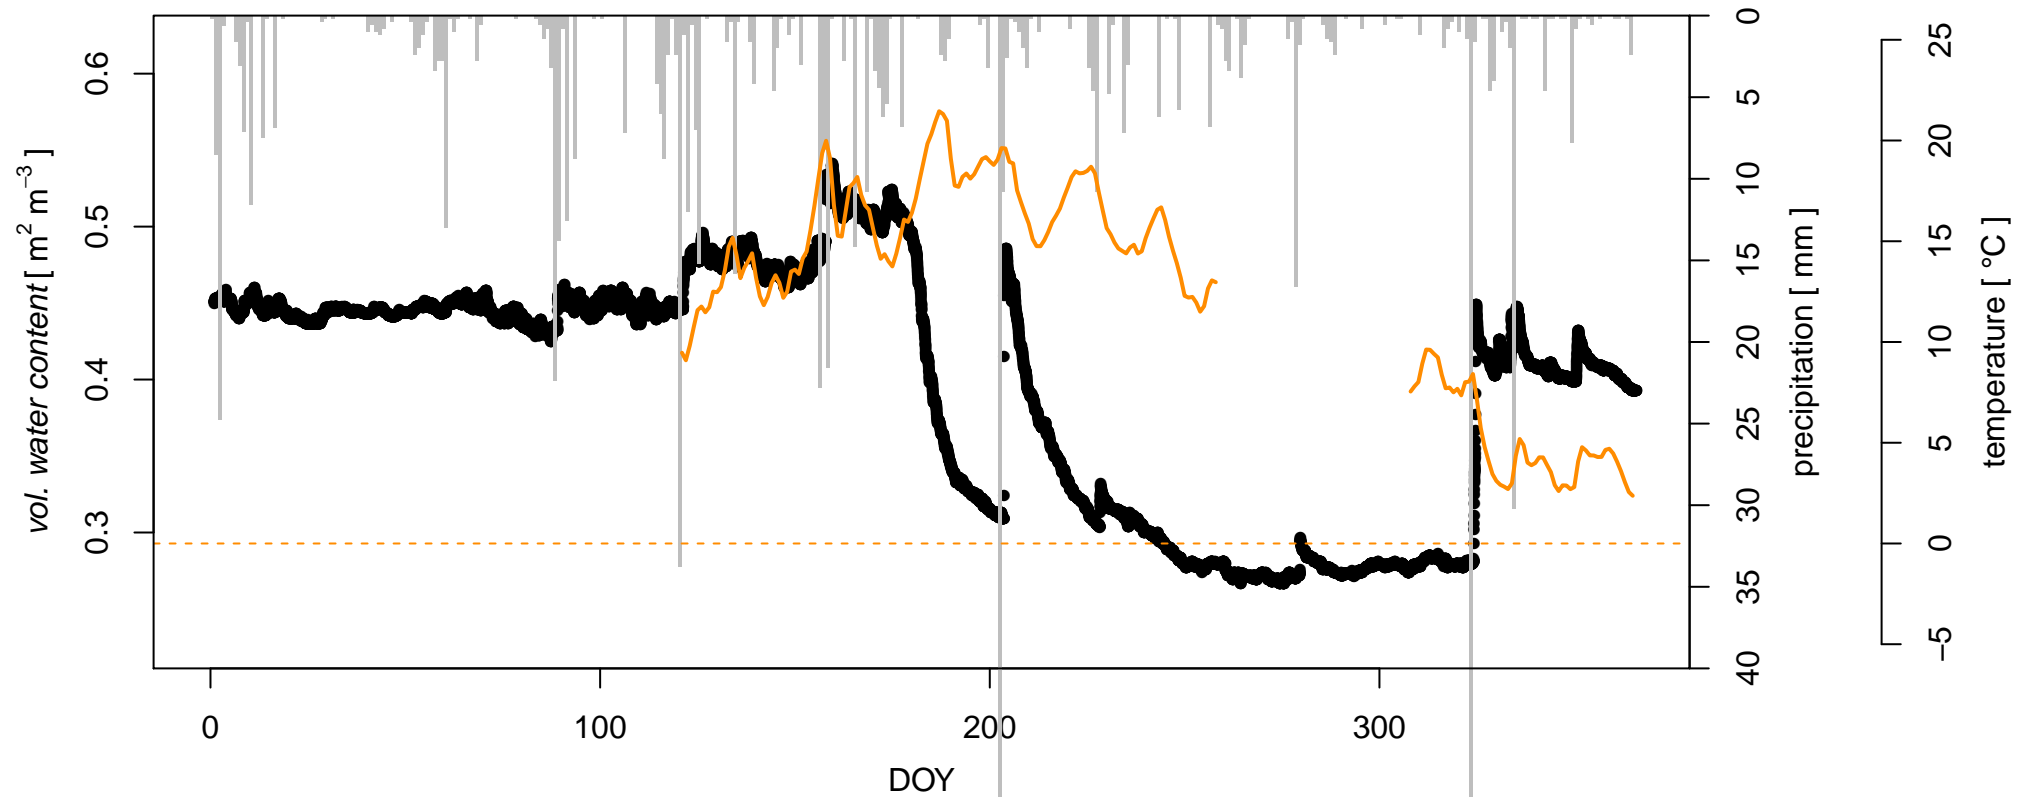

ec5 2016  
depth 30 cm

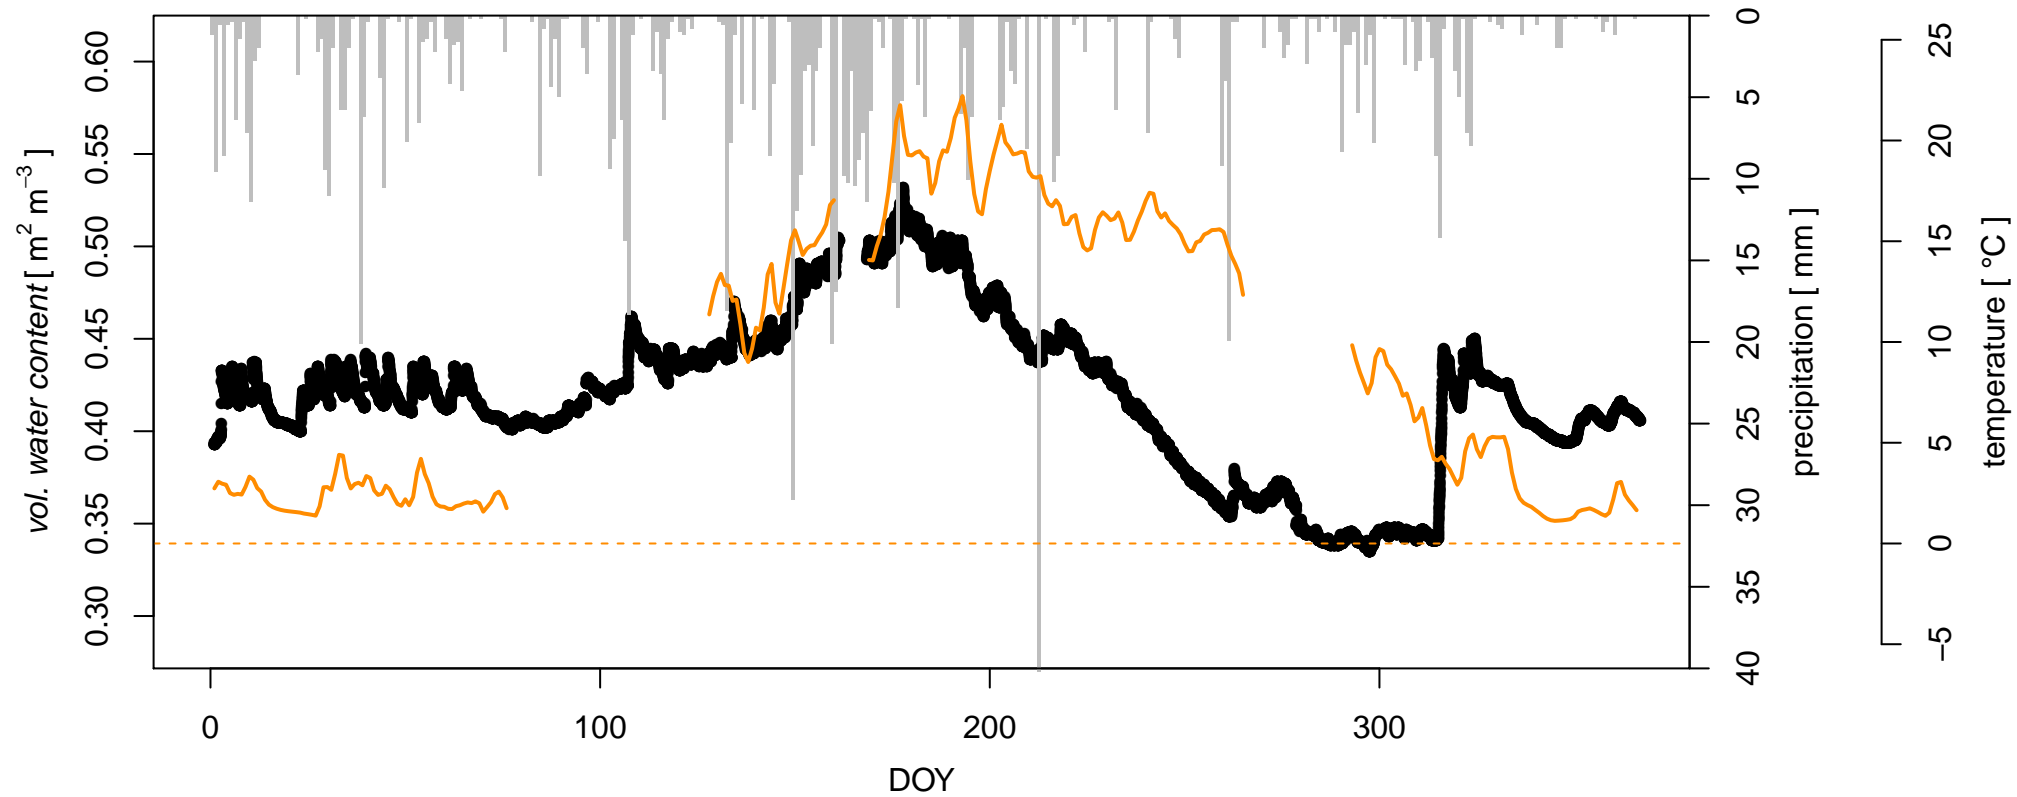

ec5 2017  
depth 30 cm

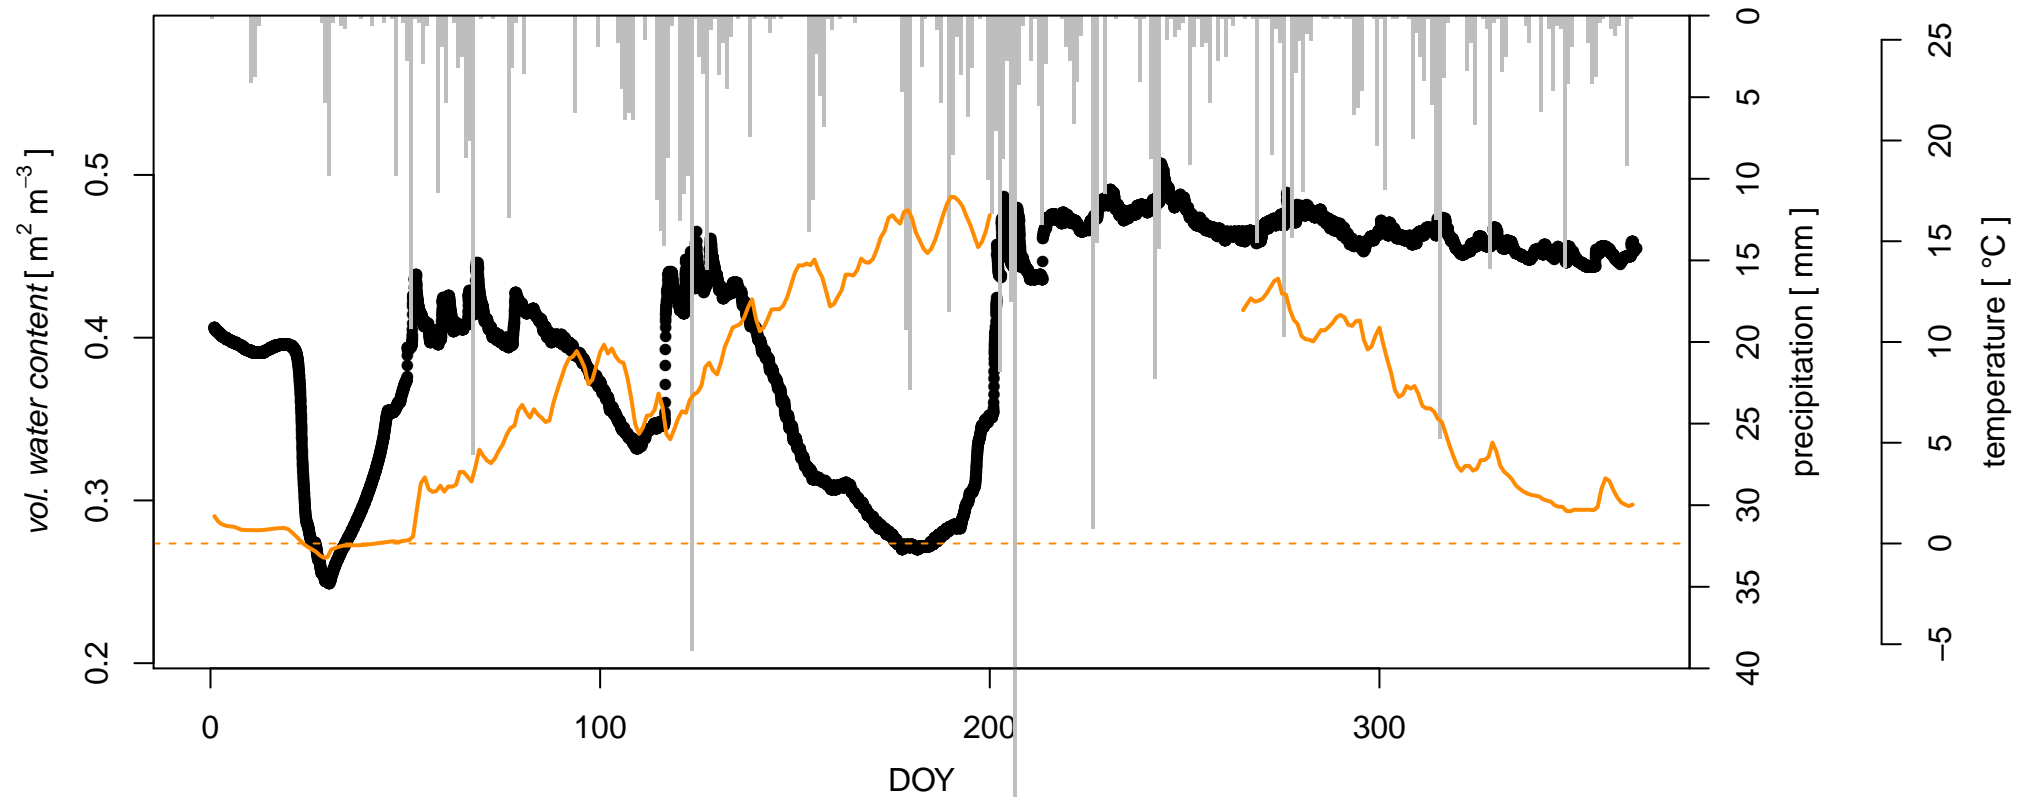

ec5 2018  
depth 30 cm

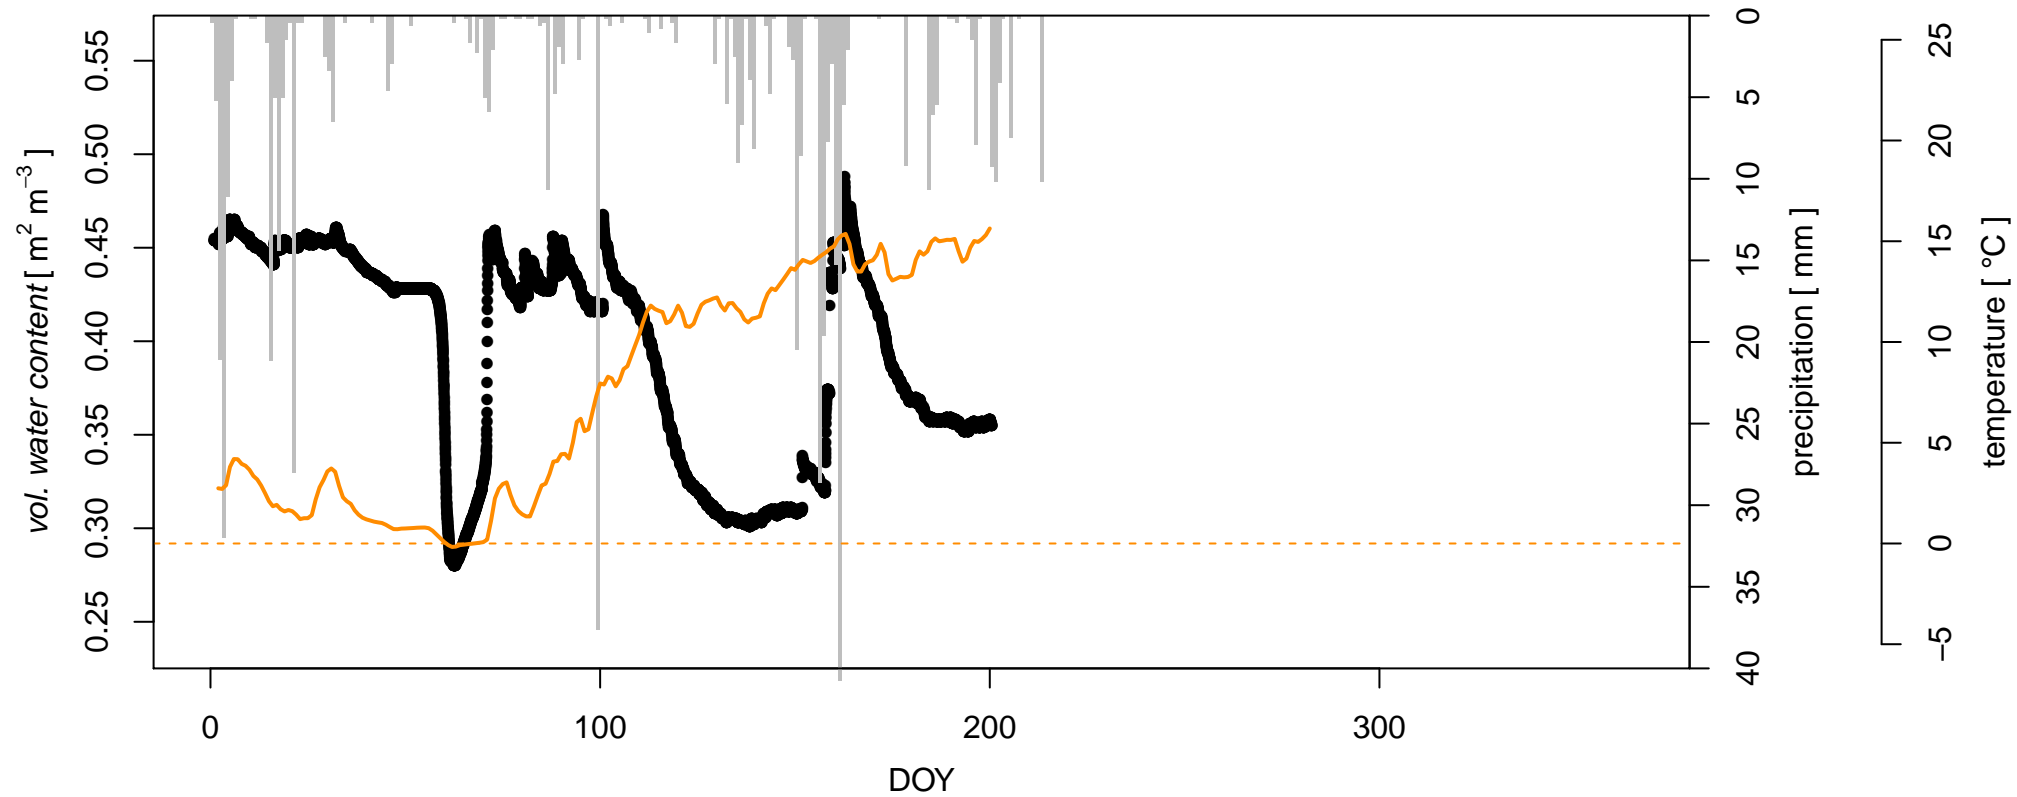

Supplement: Supplementary file 41 [file ec5vwc_30.pdf › ec5vwc_30.pdf]
