# Supplementary material for: Multi-site, multi-crop measurements in the soil–vegetation–atmosphere continuum: a comprehensive dataset from two climatically contrasting regions in southwestern Germany for the period 2009–2018
Source: Copernicus journal article supplement (doi:10.5194/essd-14-1153-2022), 2022-03-11
Supplement: Supplementary file [file essd-14-1153-2022-supplement-title-page.pdf › essd-14-1153-2022-supplement-title-page.pdf]

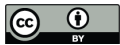

## *Supplement of*

# **Multi-site, multi-crop measurements in the soil–vegetation–atmosphere continuum: a comprehensive dataset from two climatically contrasting regions in southwestern Germany for the period 2009–2018**

**Tobias K. D. Weber et al.**

*Correspondence to:* Tobias K. D. Weber ([tobias.weber@uni-hohenheim.de](mailto:tobias.weber@uni-hohenheim.de))  
and Joachim Ingwersen ([joachim.ingwersen@uni-hohenheim.de](mailto:joachim.ingwersen@uni-hohenheim.de))

- [essd-14-1153-2022-supplement-title-page.pdf](#)
- [Fco2\\_fluxes\\_ec1-6.zip](#)
- [soil\\_water\\_content\\_ec1-6.zip](#)

The copyright of individual parts of the supplement might differ from the article licence.
