# Supplementary figures and images for: Multi-site, multi-crop measurements in the soil–vegetation–atmosphere continuum: a comprehensive dataset from two climatically contrasting regions in southwestern Germany for the period 2009–2018
Source: Copernicus journal article supplement (doi:10.5194/essd-14-1153-2022), 2022-03-11

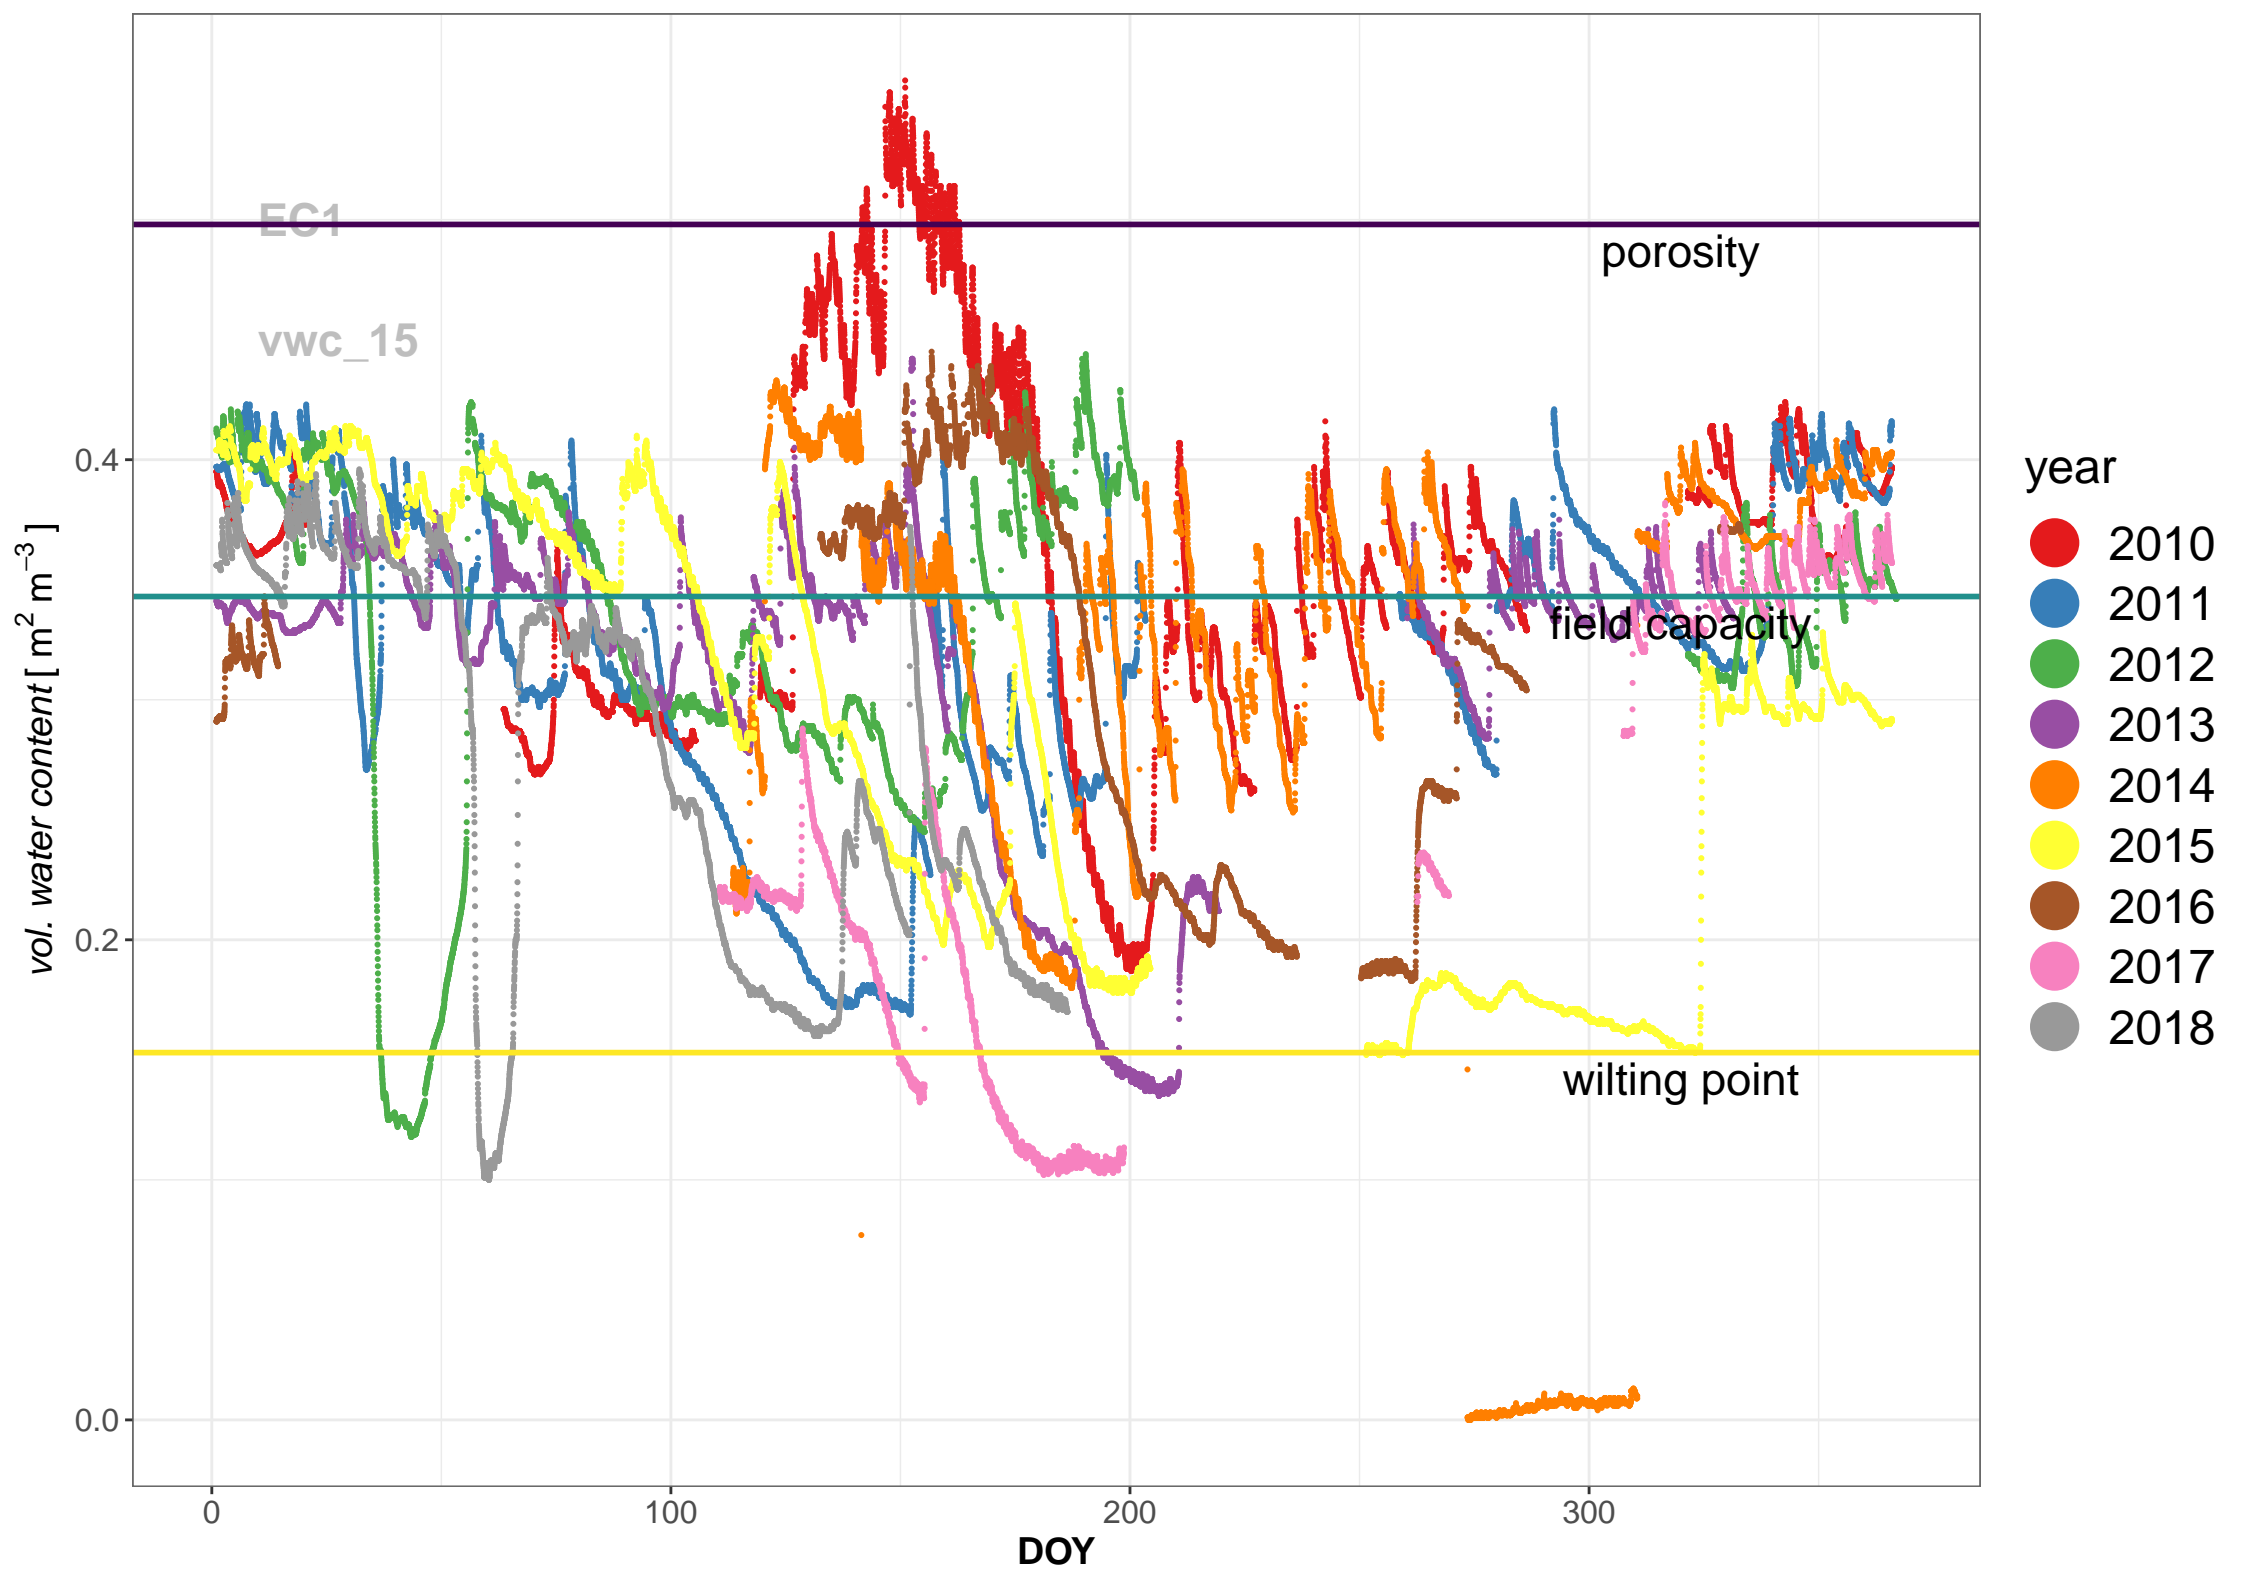

Supplement: Supplementary file 2 [file ec1vwc_15_DOY.pdf › ec1vwc_15_DOY.pdf]

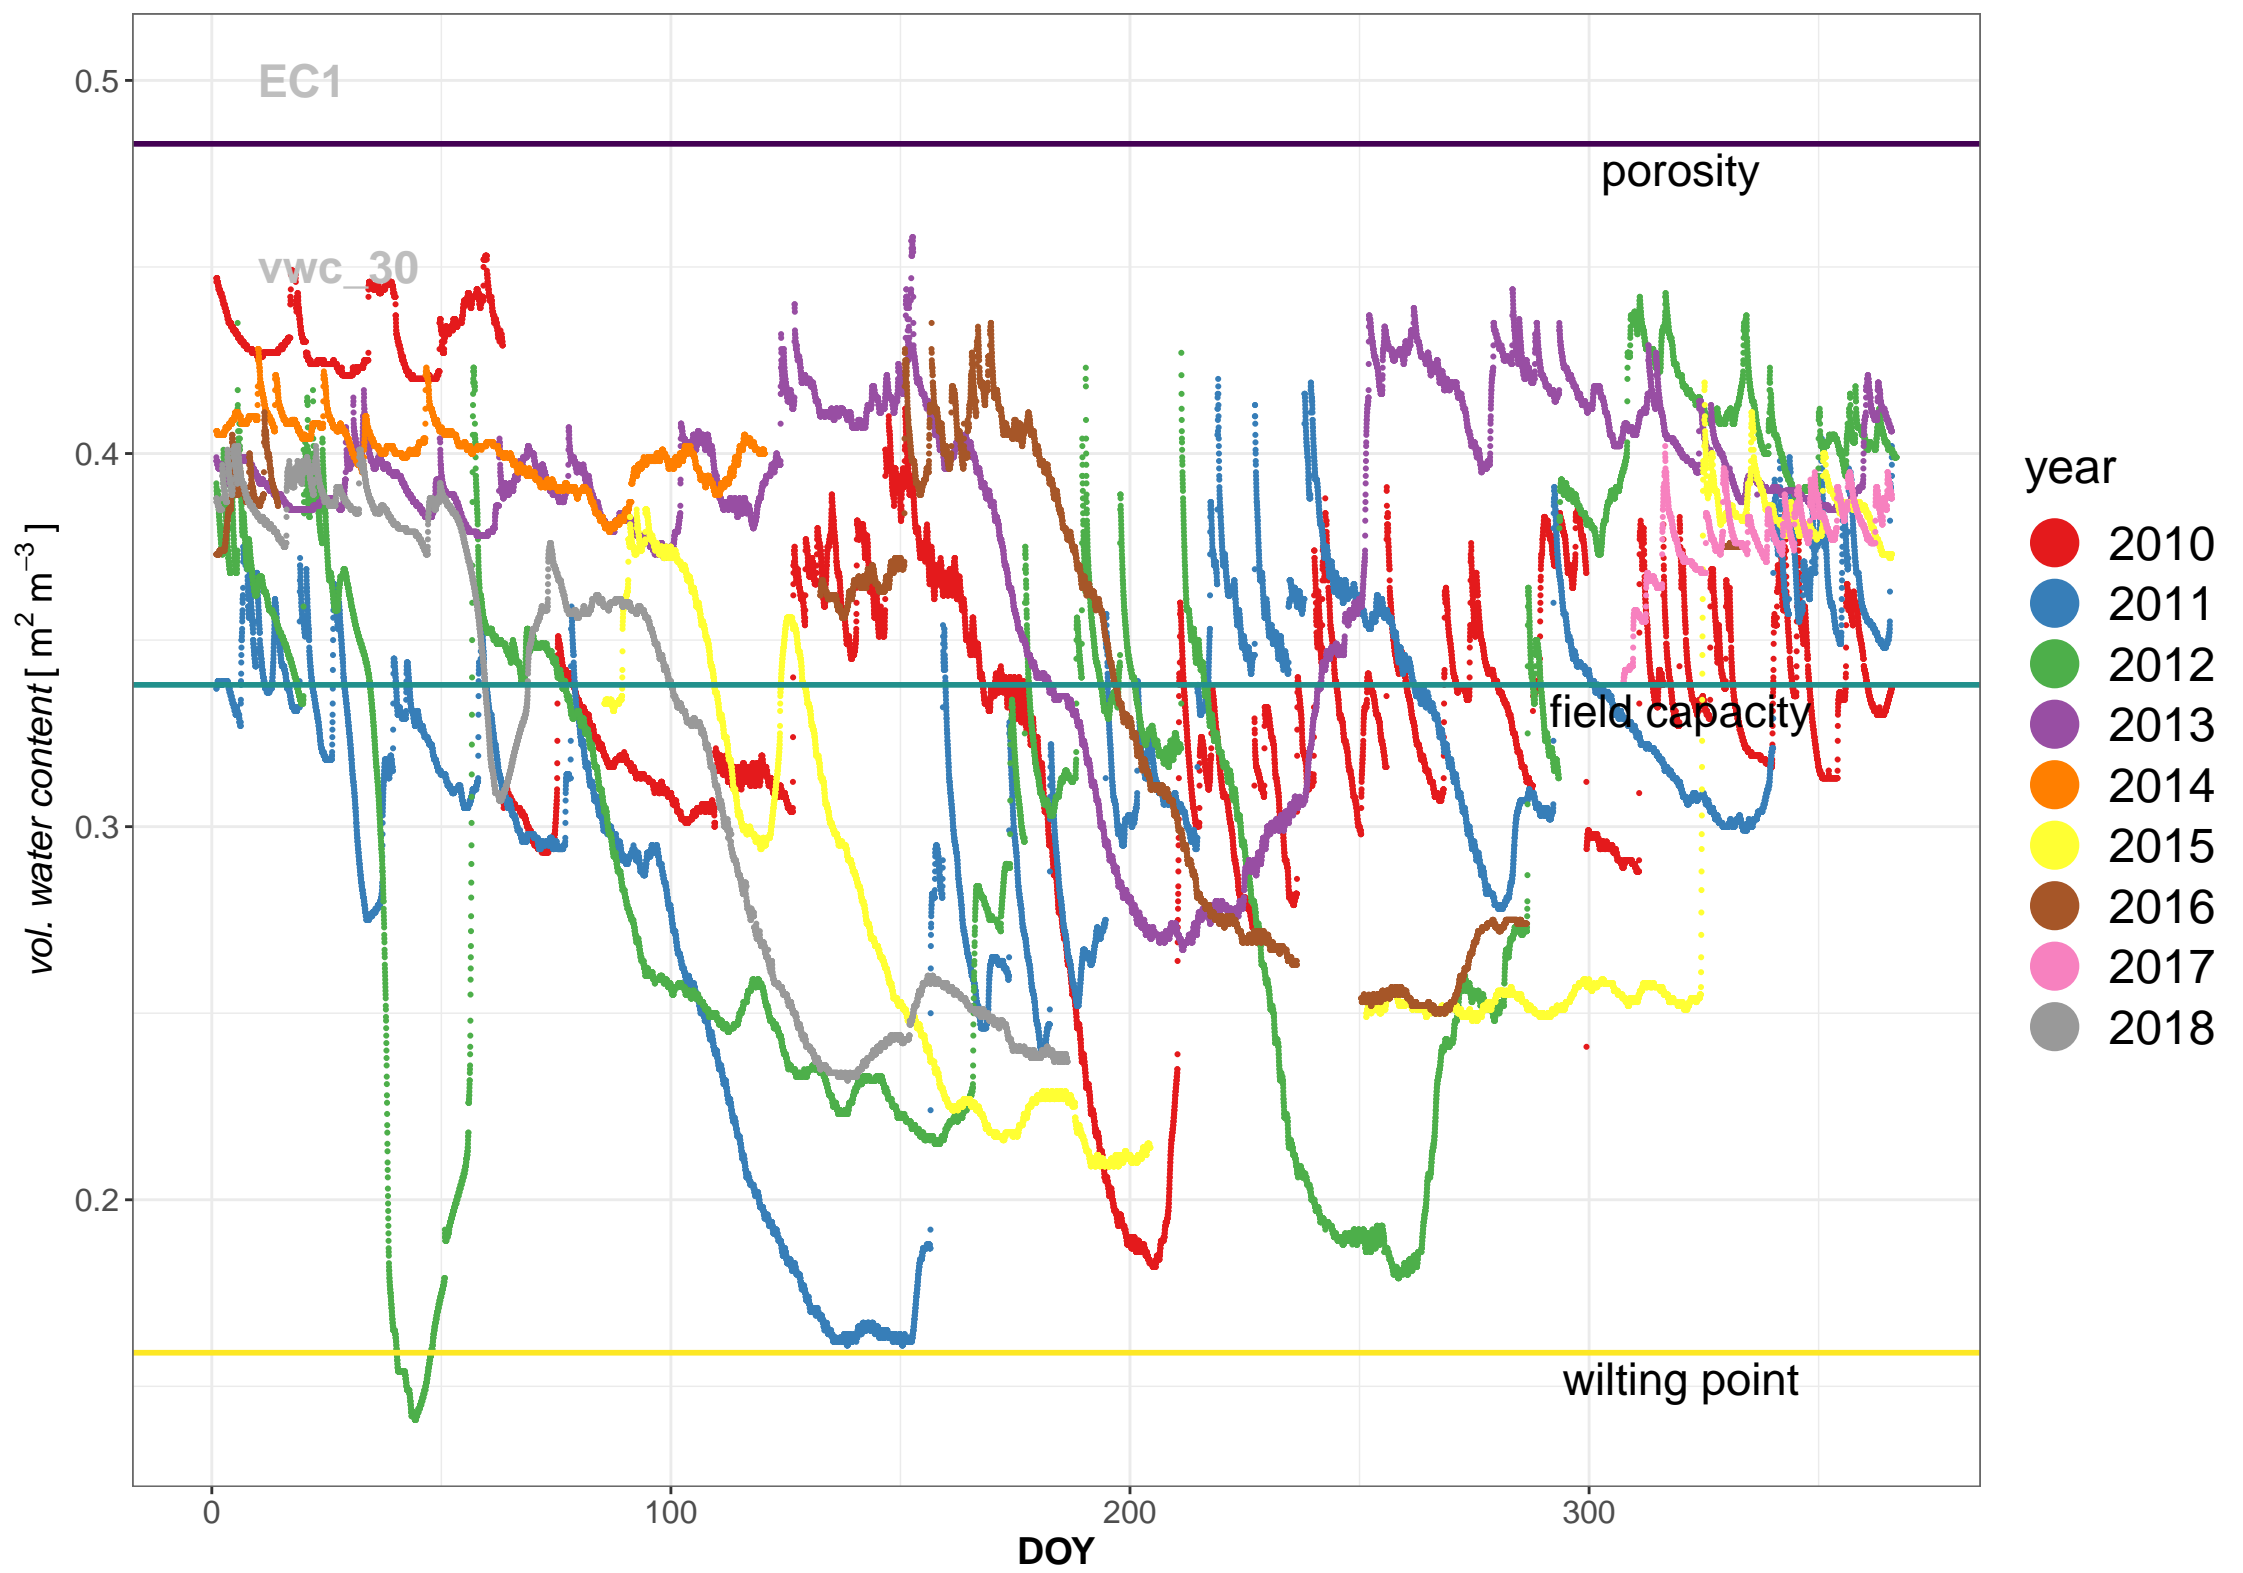

Supplement: Supplementary file 4 [file ec1vwc_30_DOY.pdf › ec1vwc_30_DOY.pdf]

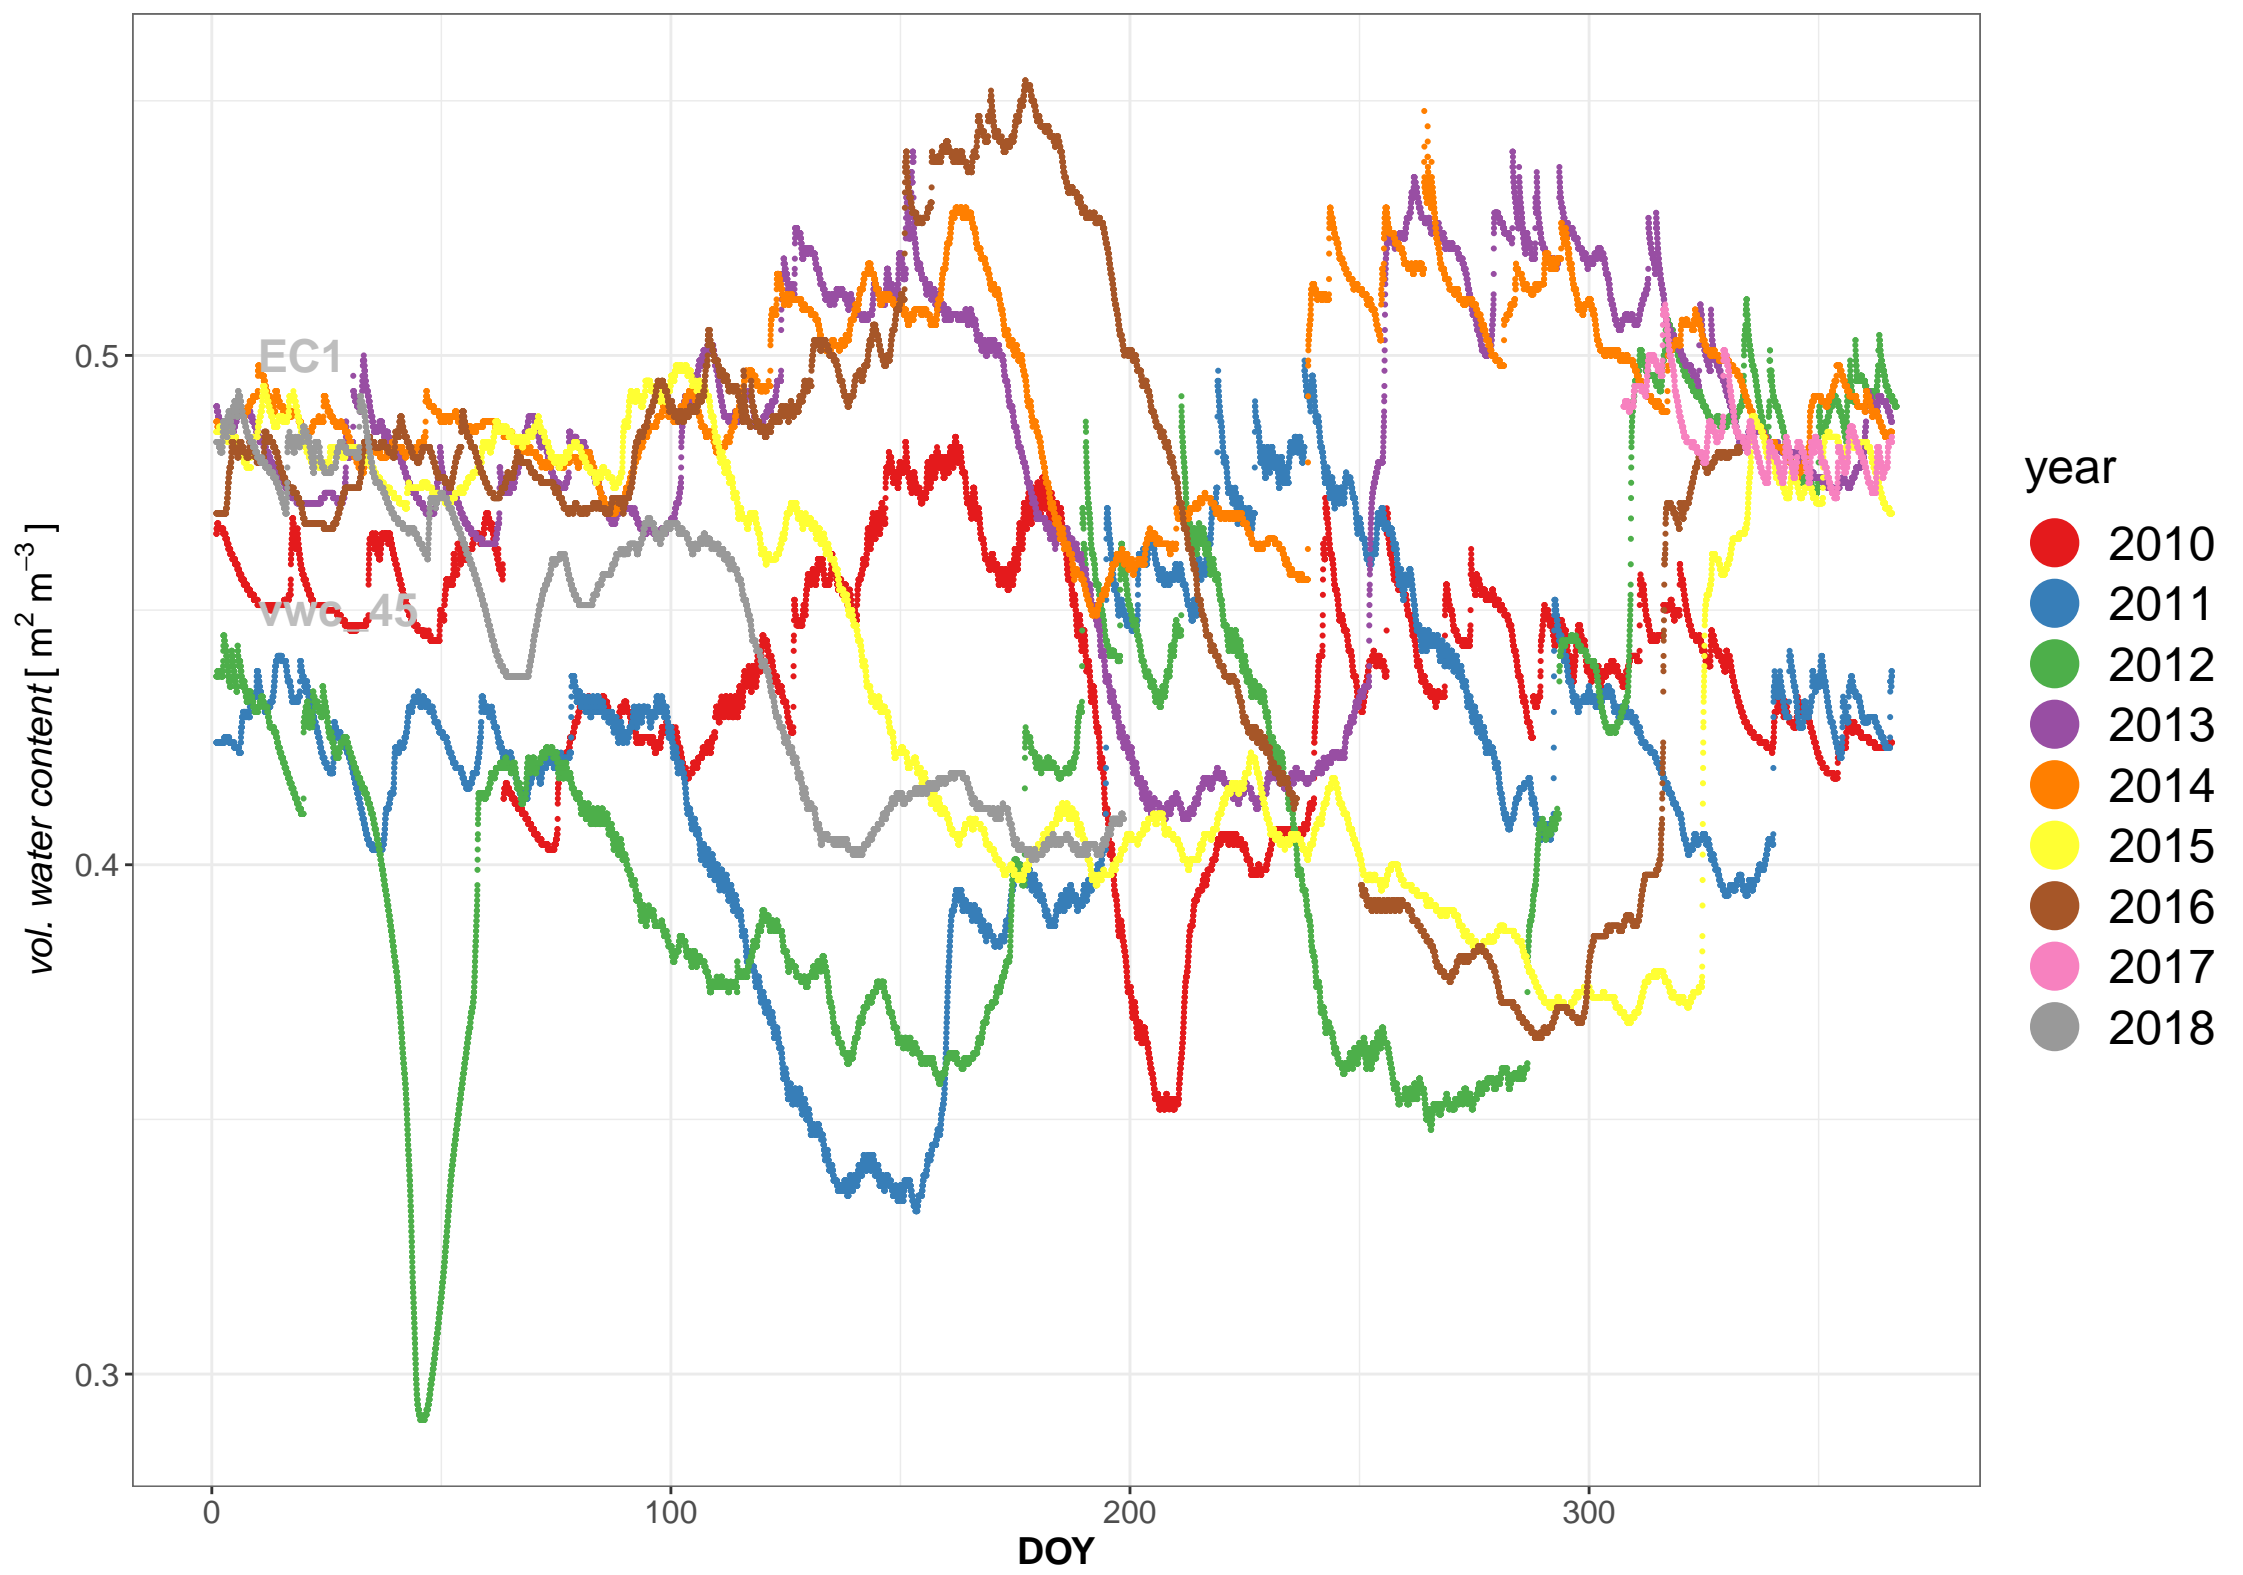

Supplement: Supplementary file 6 [file ec1vwc_45_DOY.pdf › ec1vwc_45_DOY.pdf]

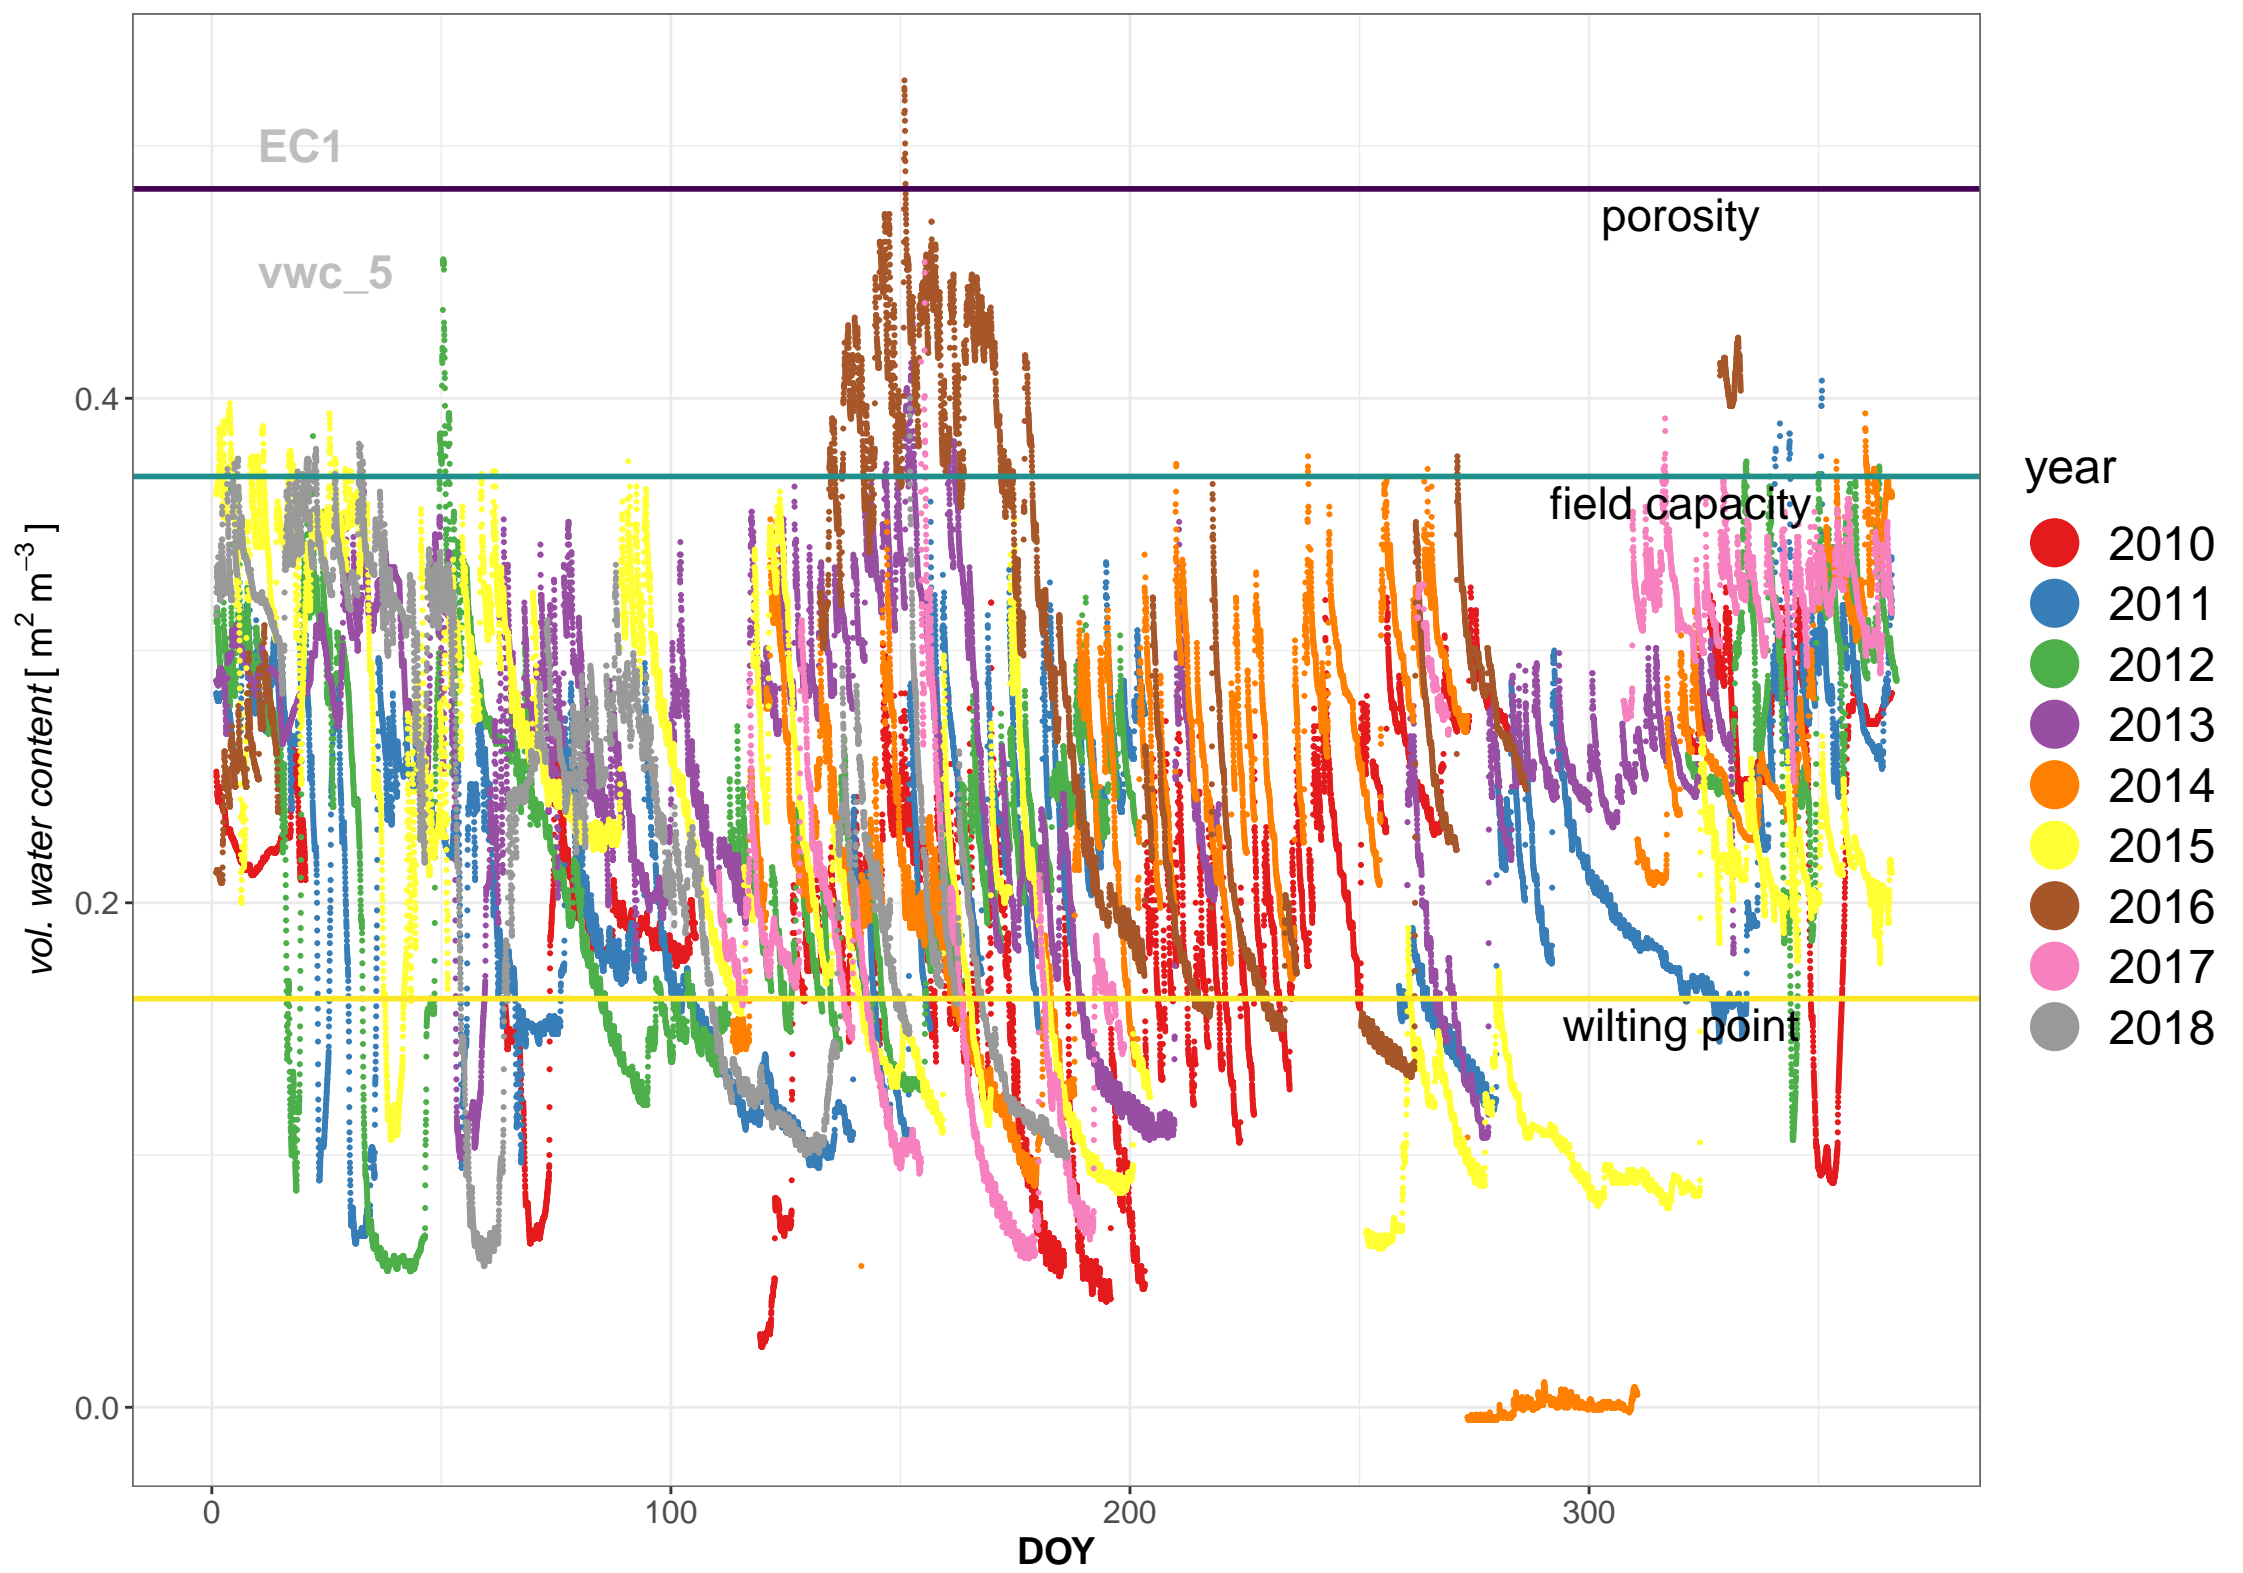

Supplement: Supplementary file 8 [file ec1vwc_5_DOY.pdf › ec1vwc_5_DOY.pdf]

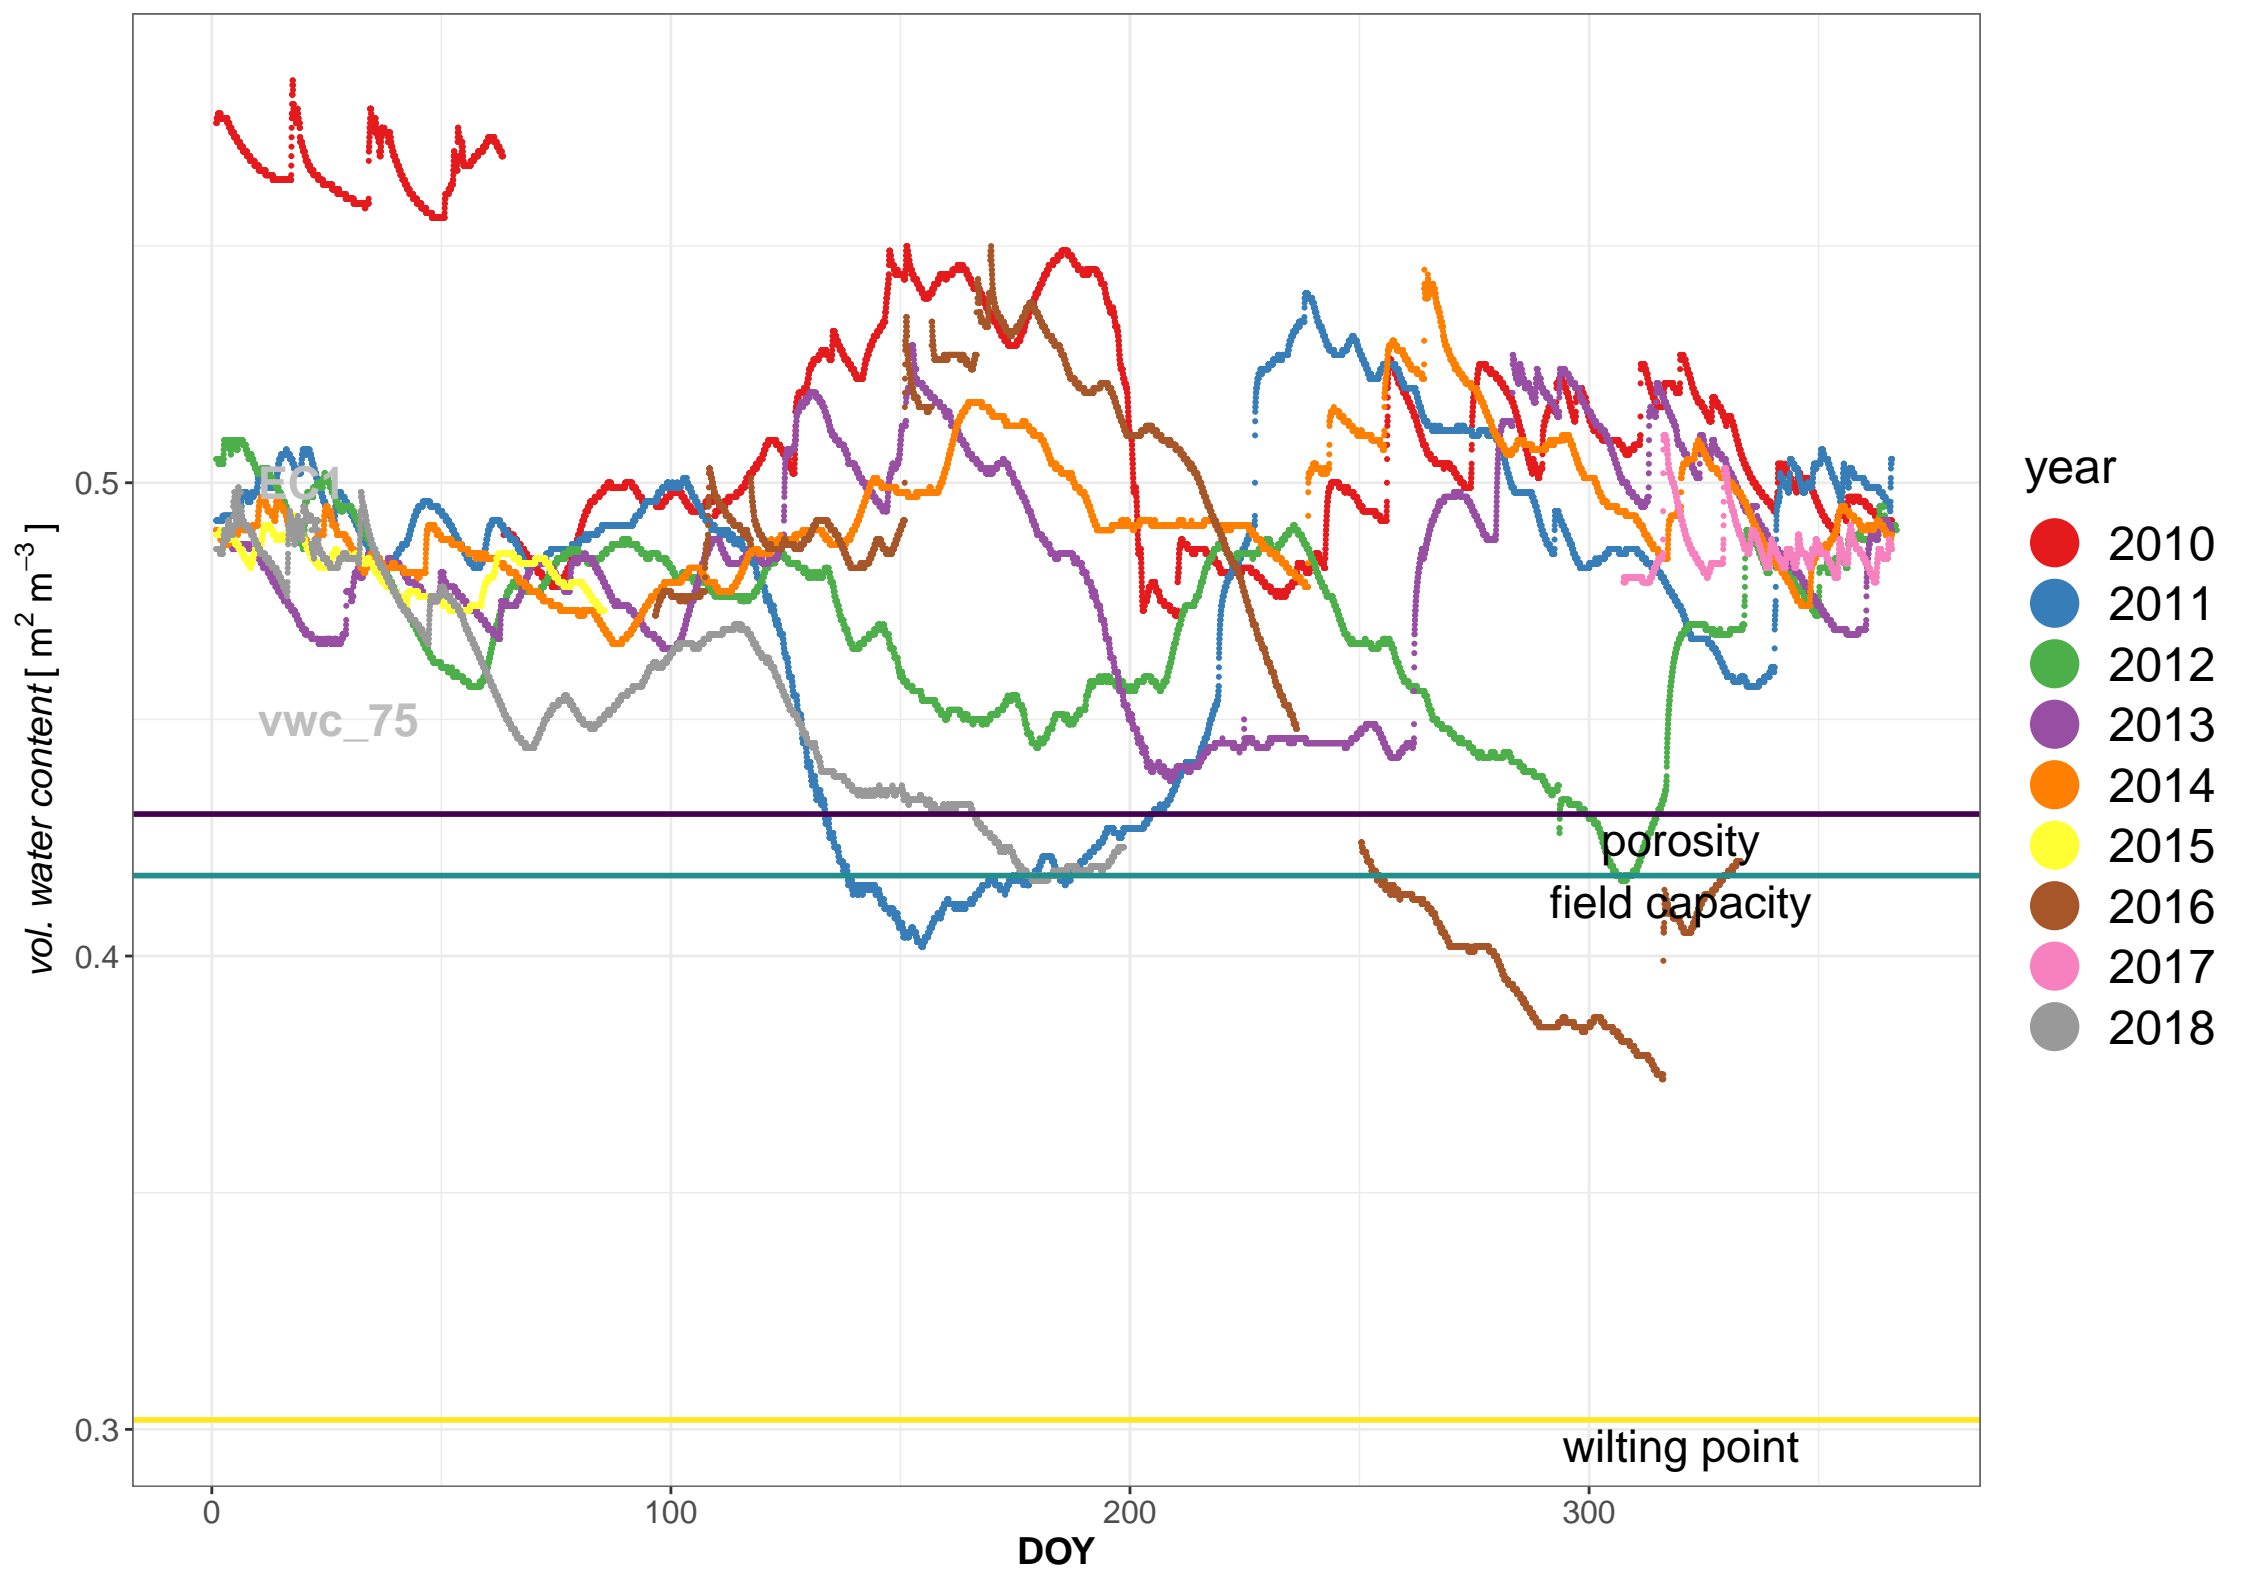

Supplement: Supplementary file 10 [file ec1vwc_75_DOY.pdf › ec1vwc_75_DOY.pdf]

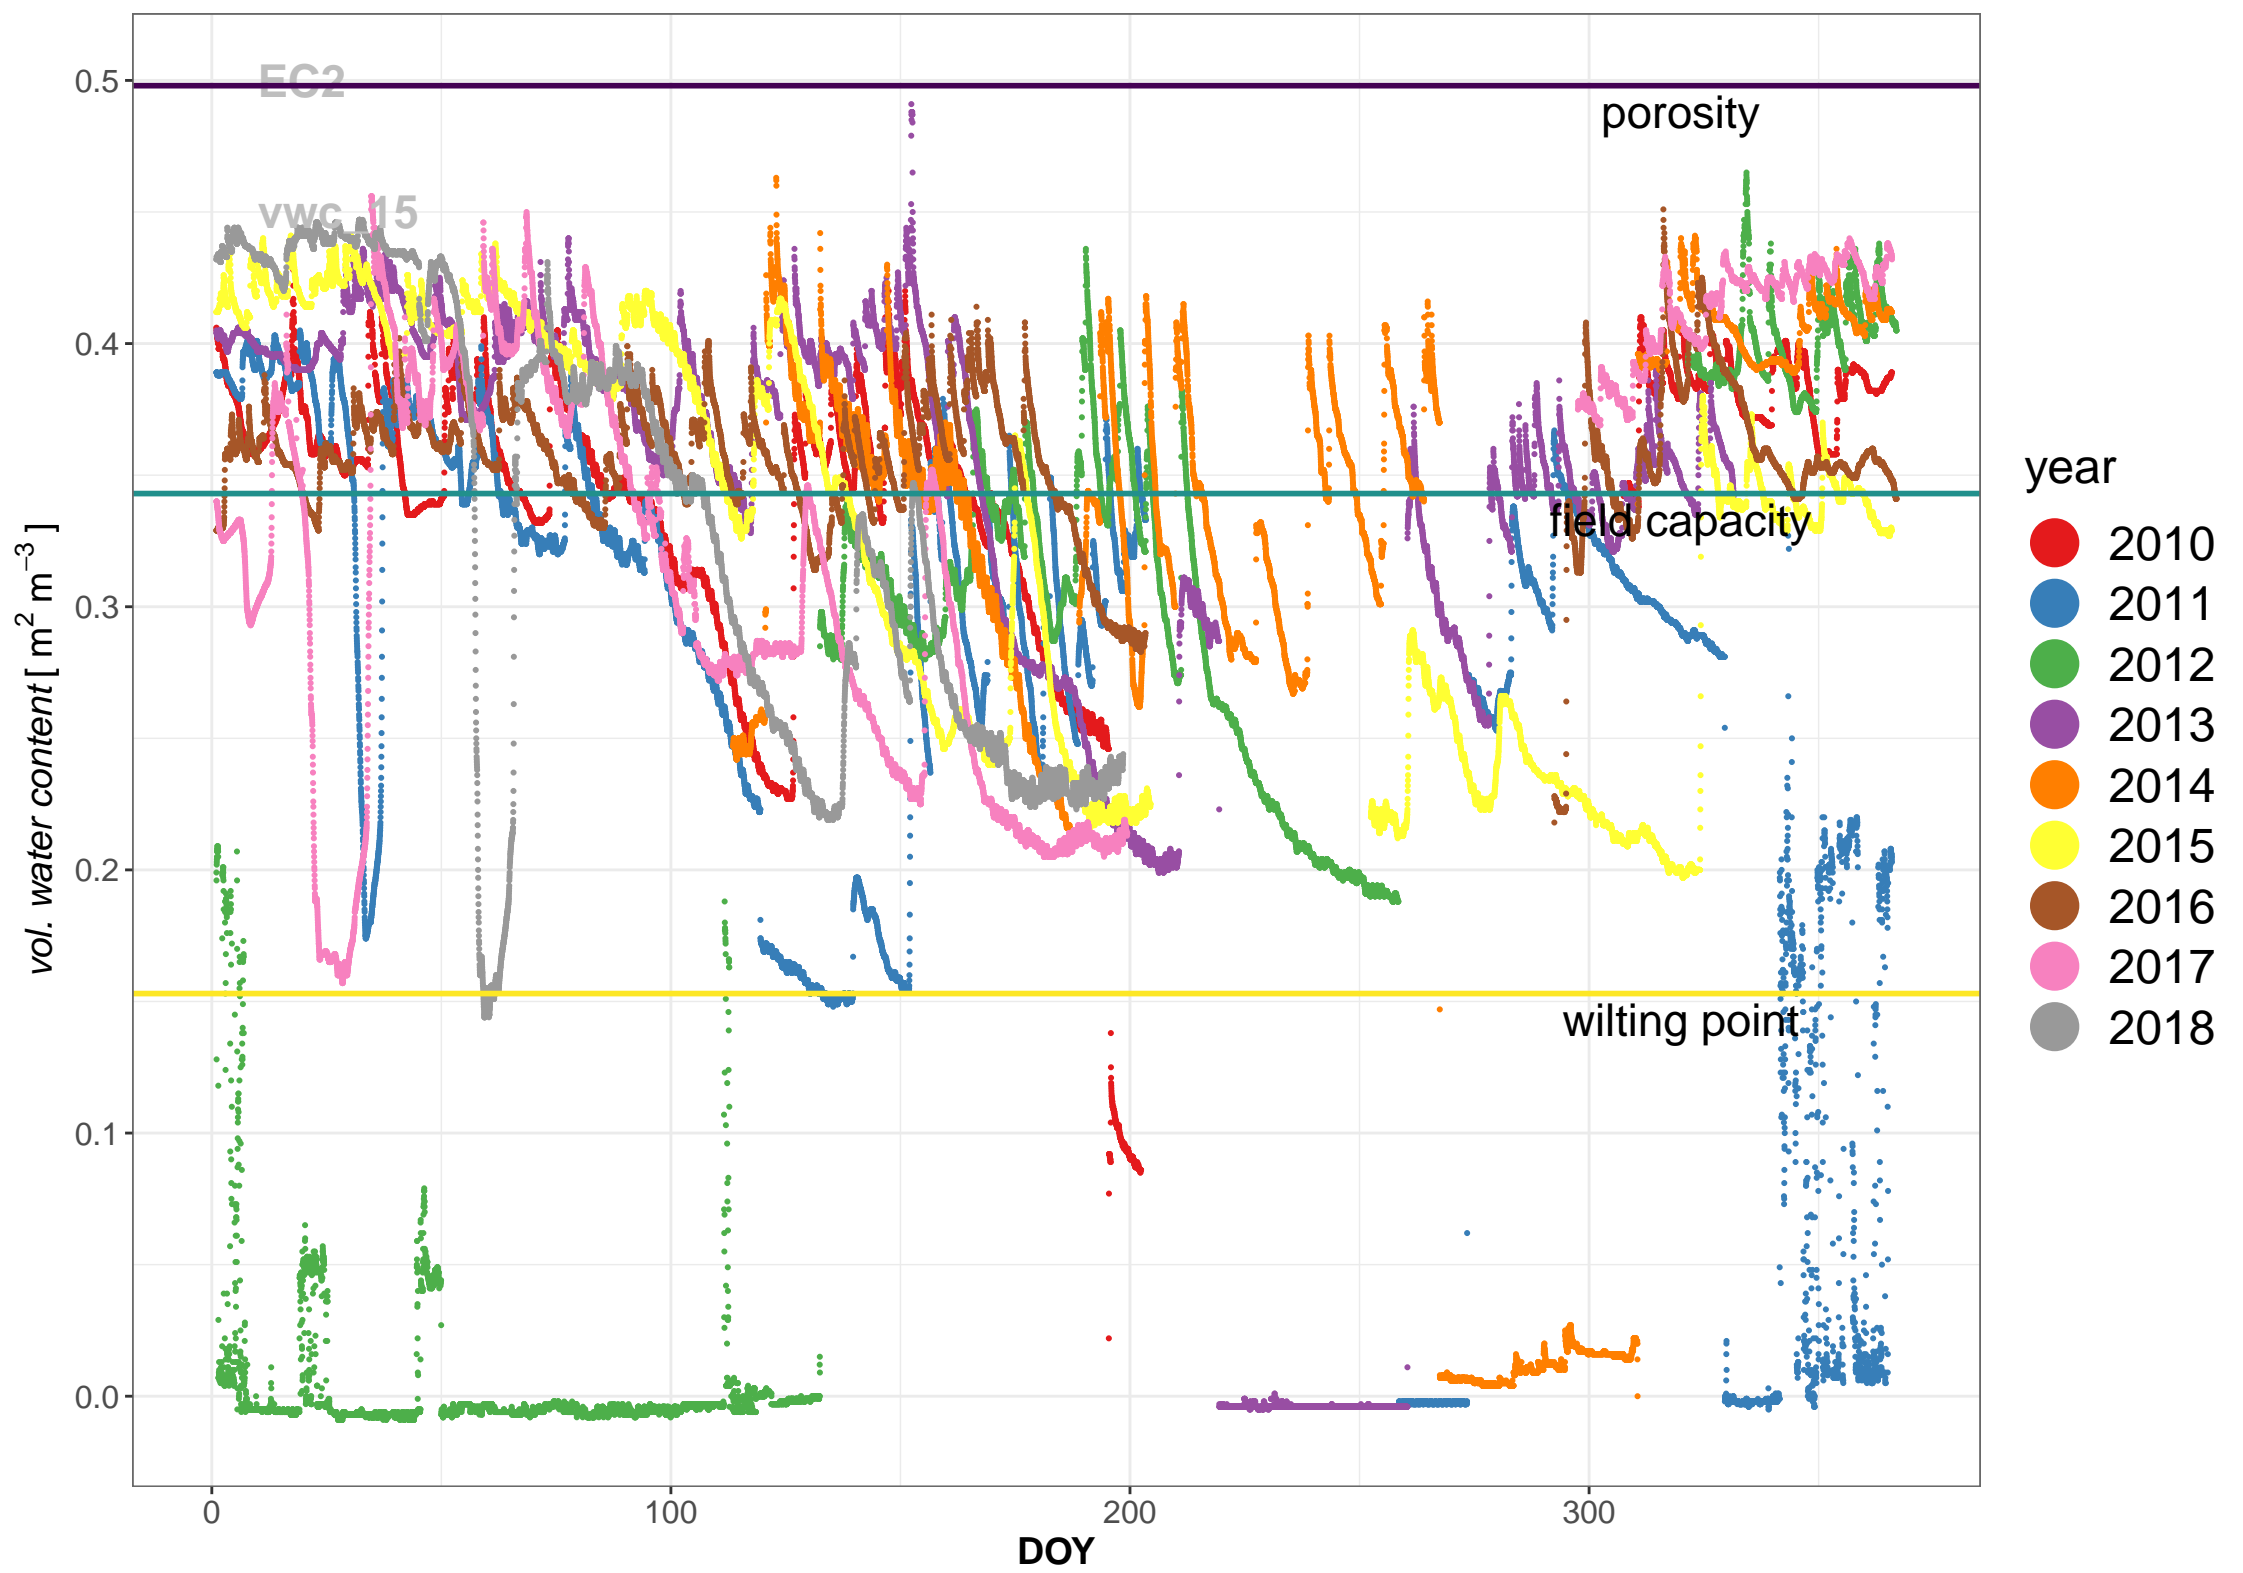

Supplement: Supplementary file 12 [file ec2vwc_15_DOY.pdf › ec2vwc_15_DOY.pdf]

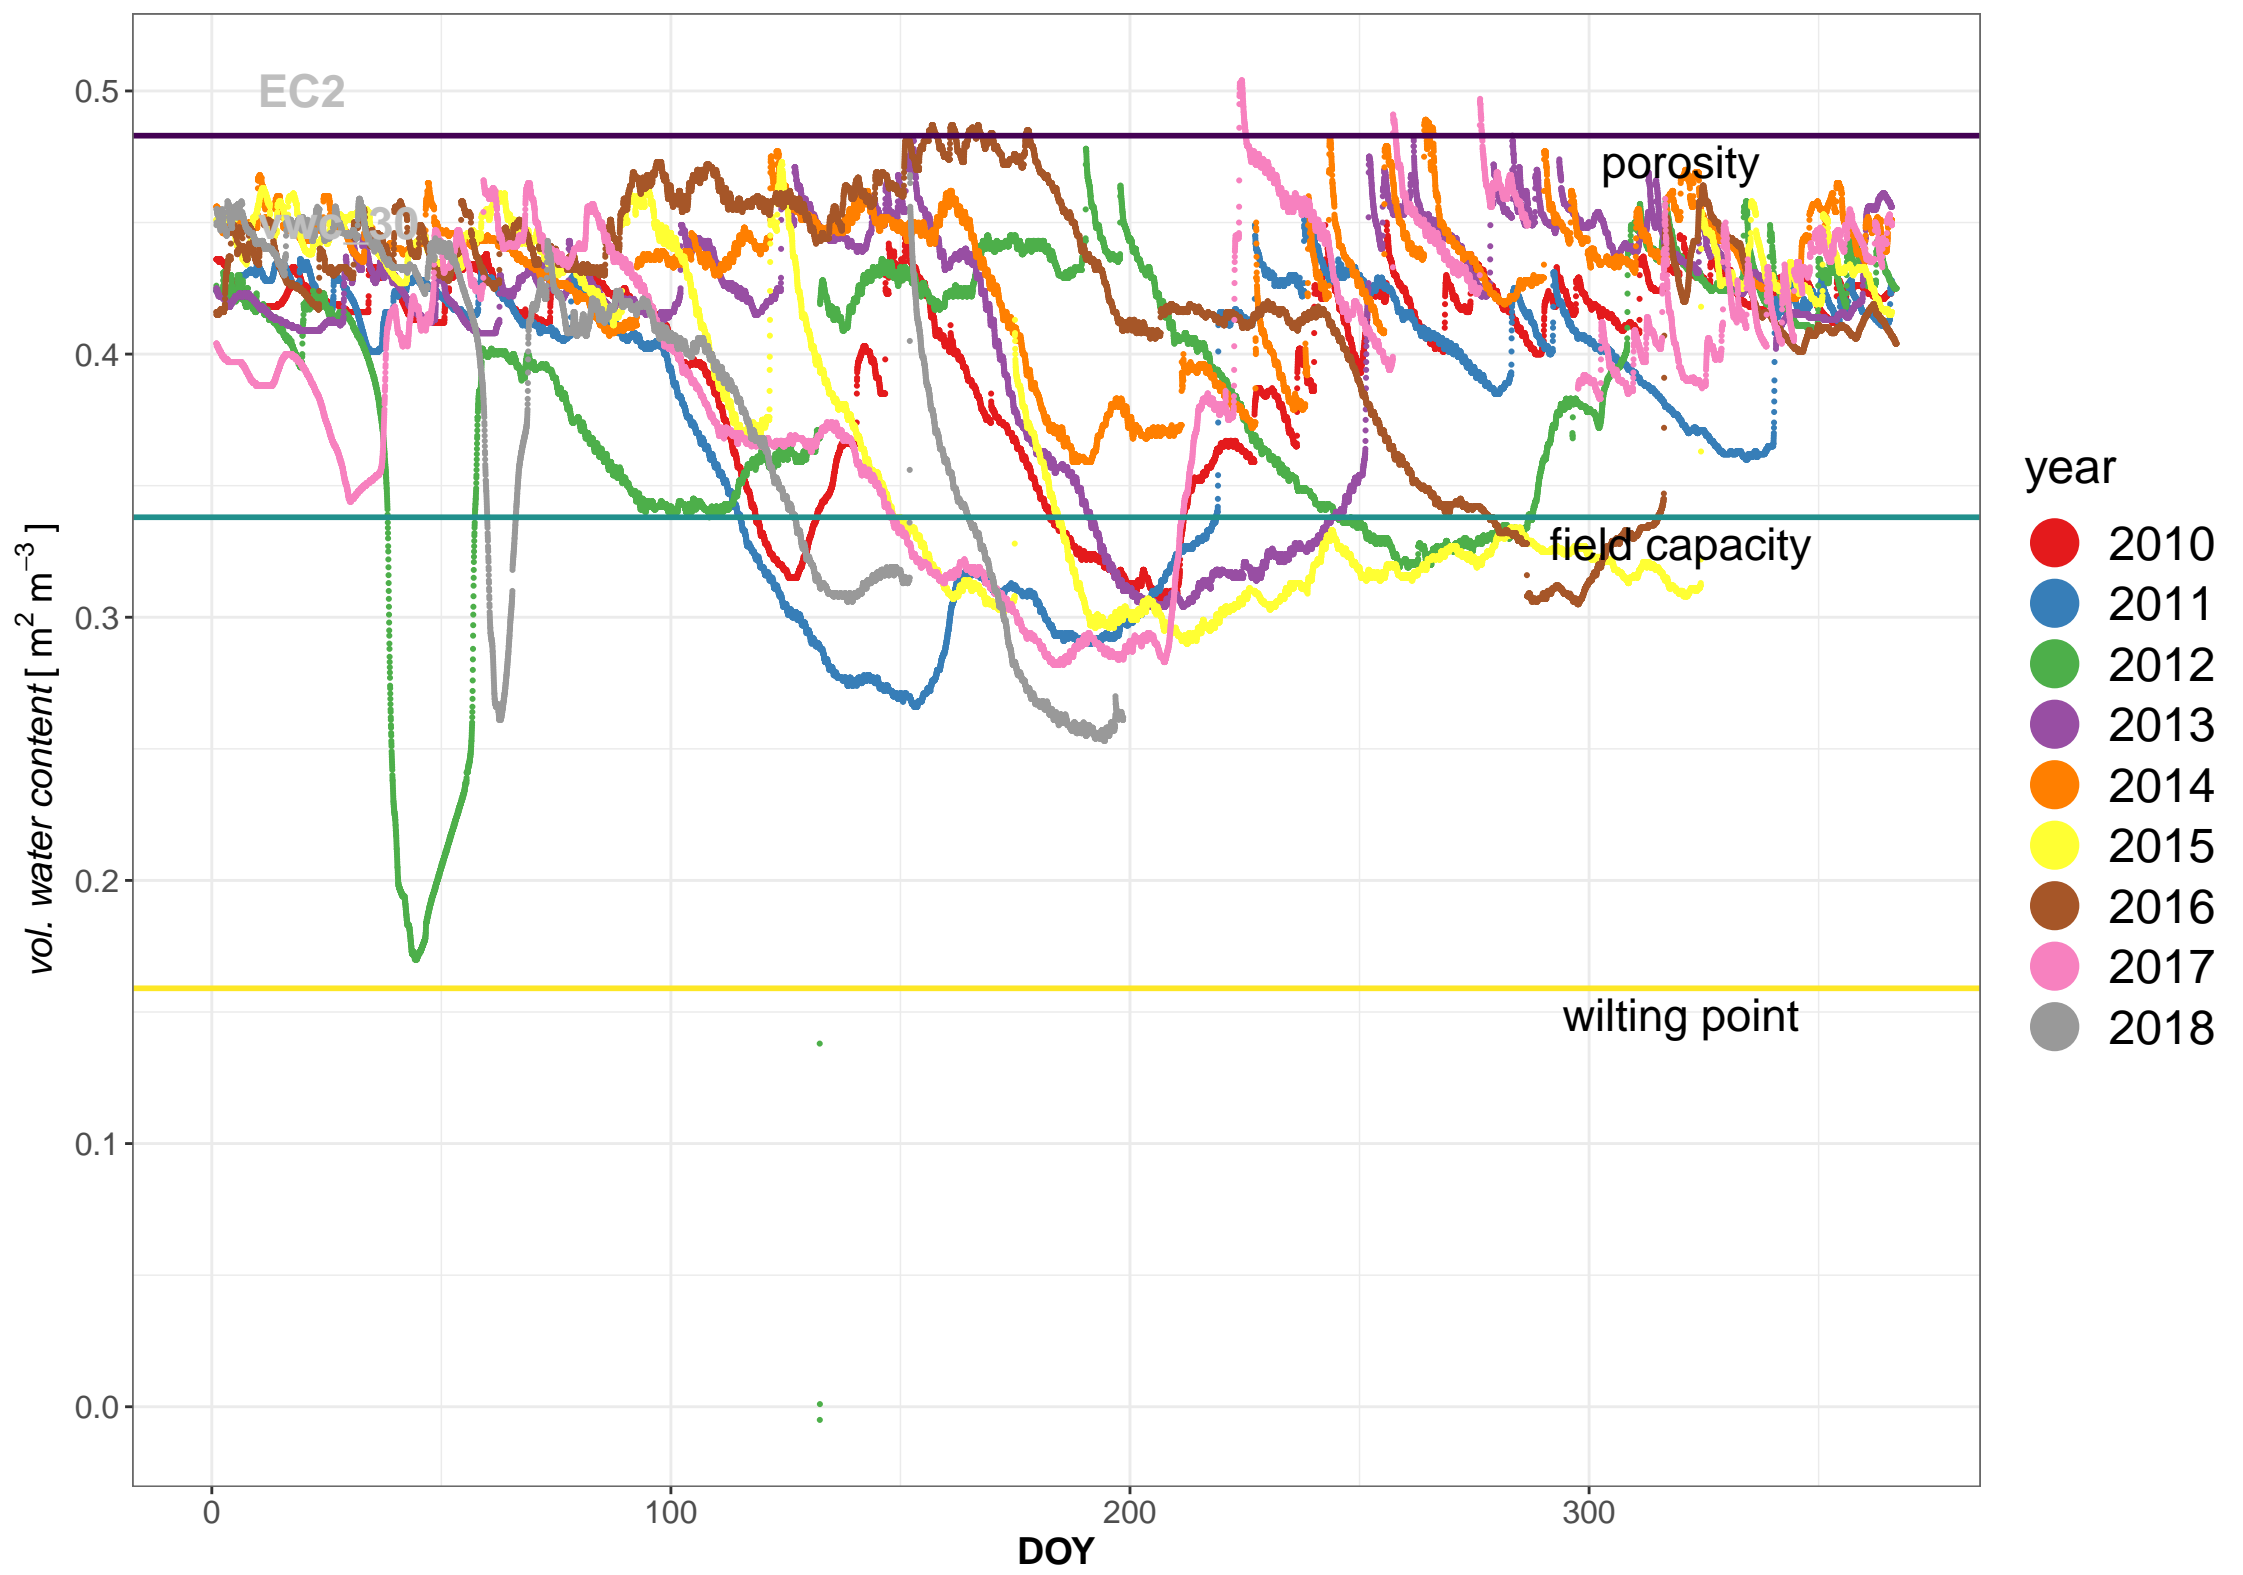

Supplement: Supplementary file 14 [file ec2vwc_30_DOY.pdf › ec2vwc_30_DOY.pdf]

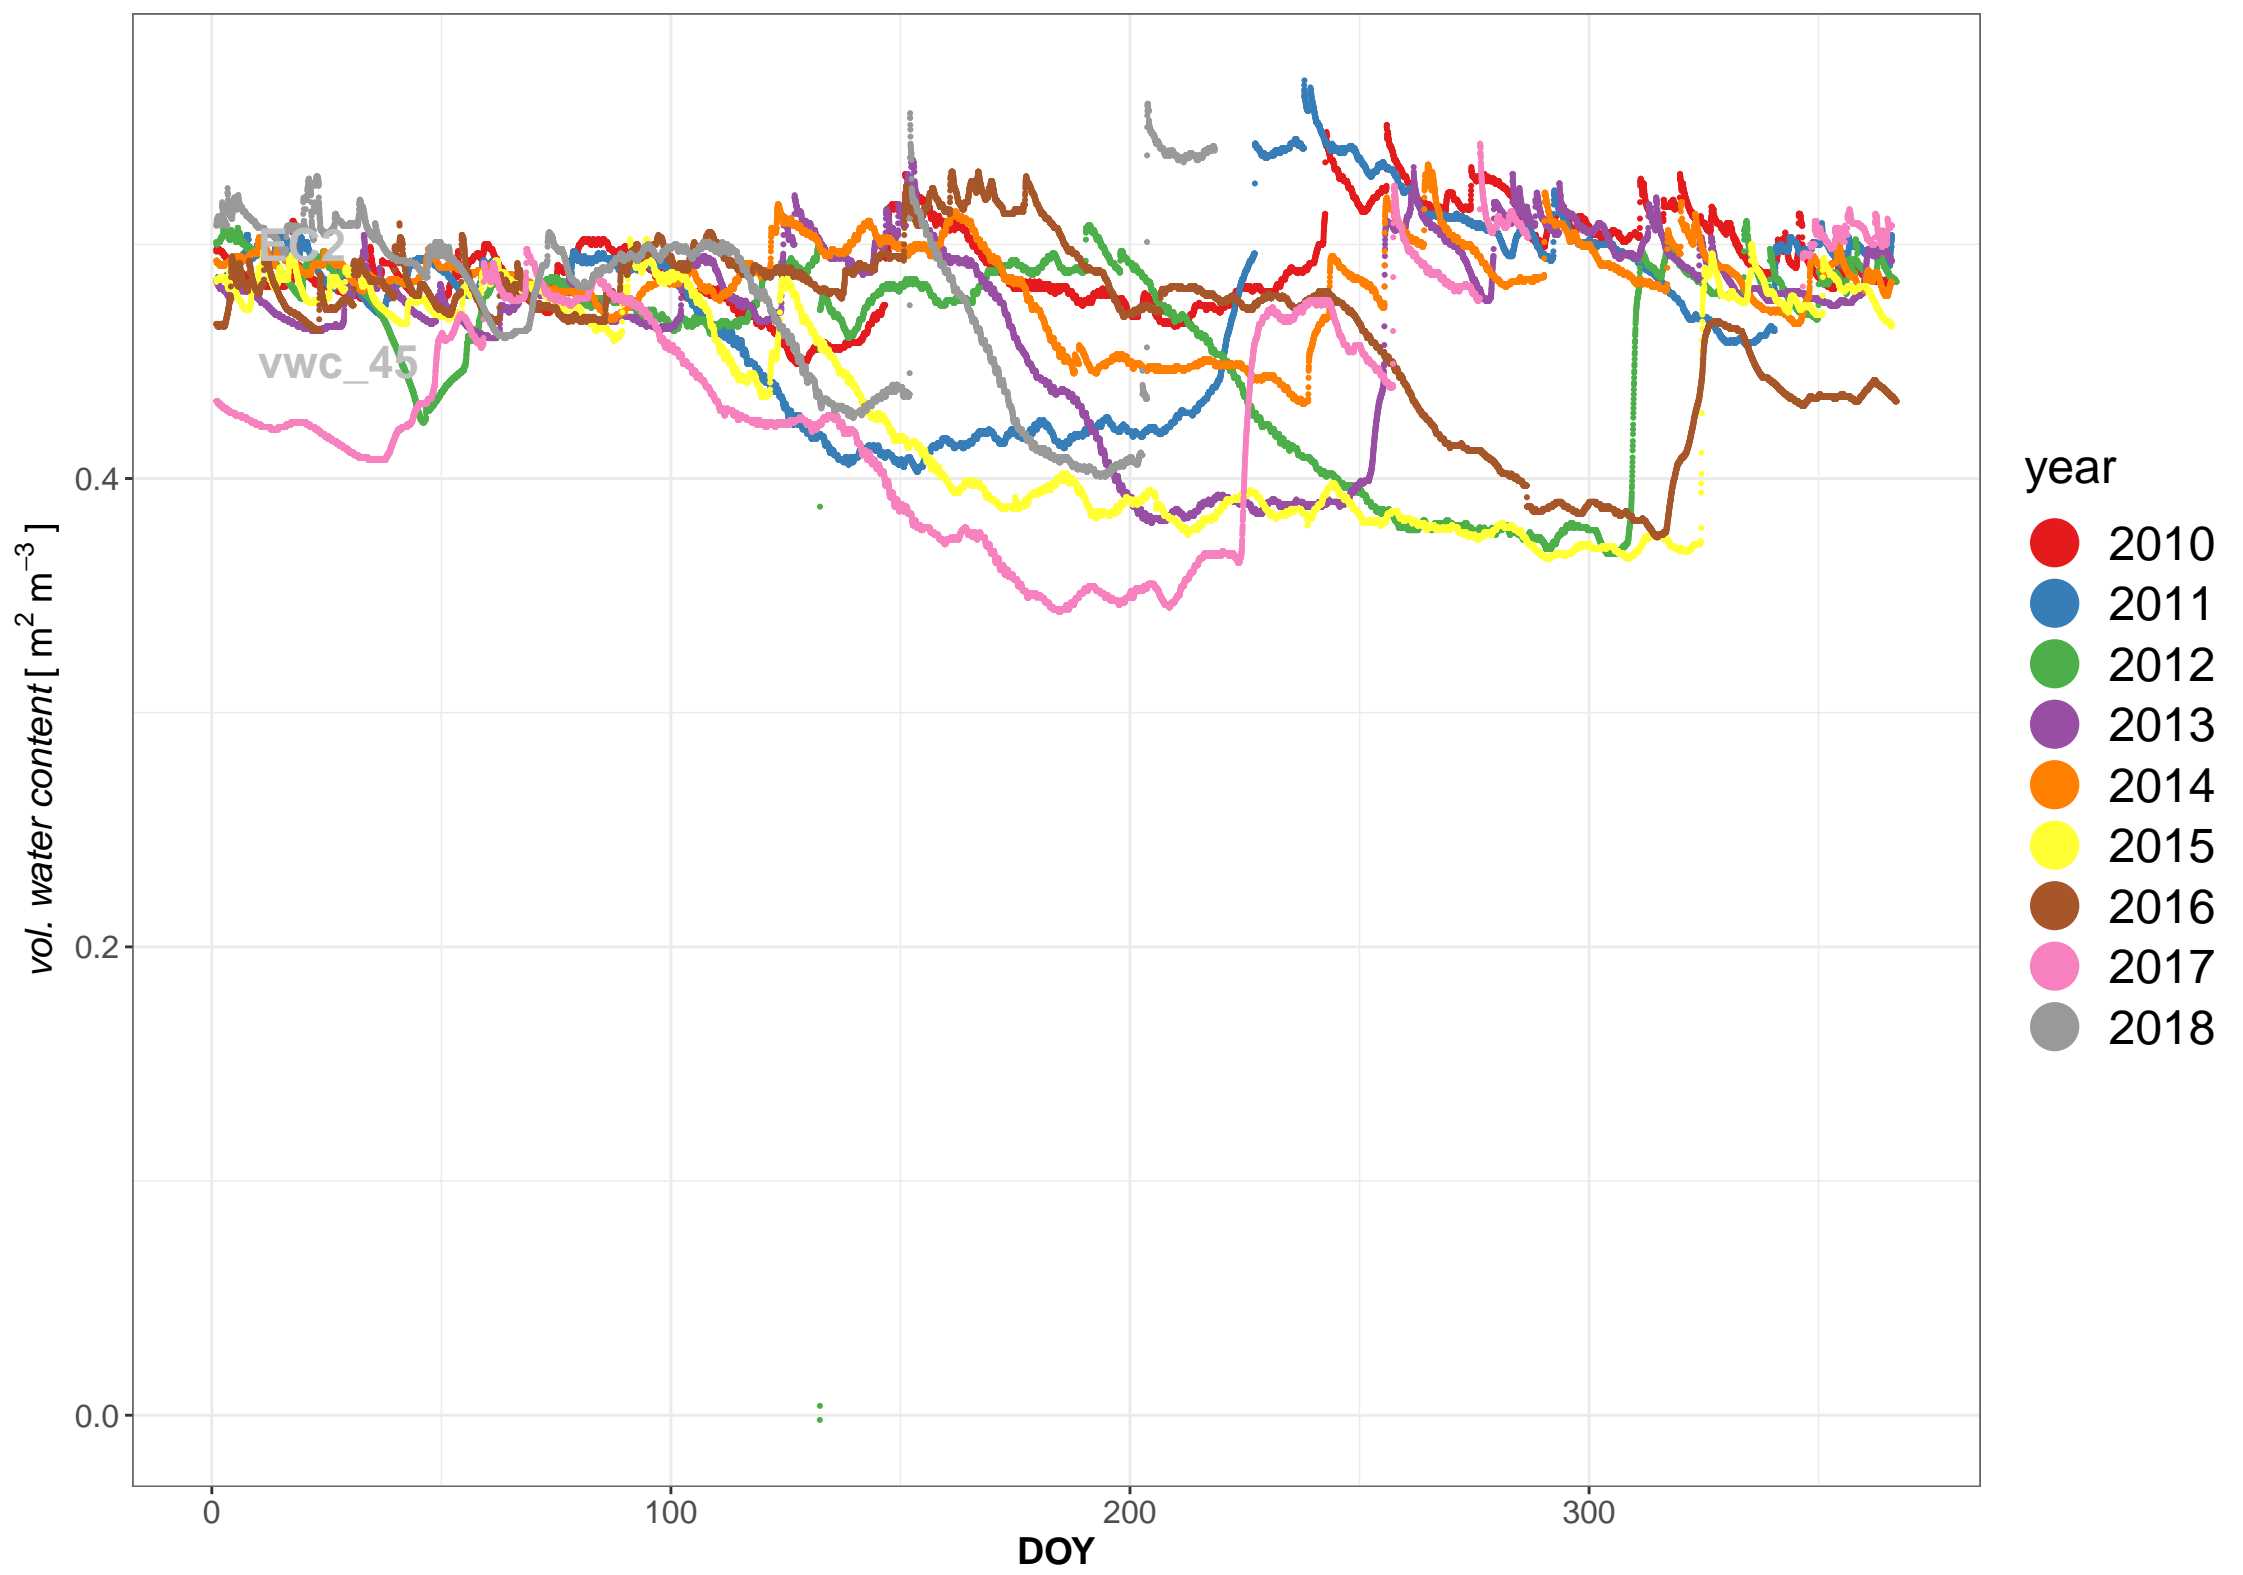

Supplement: Supplementary file 16 [file ec2vwc_45_DOY.pdf › ec2vwc_45_DOY.pdf]

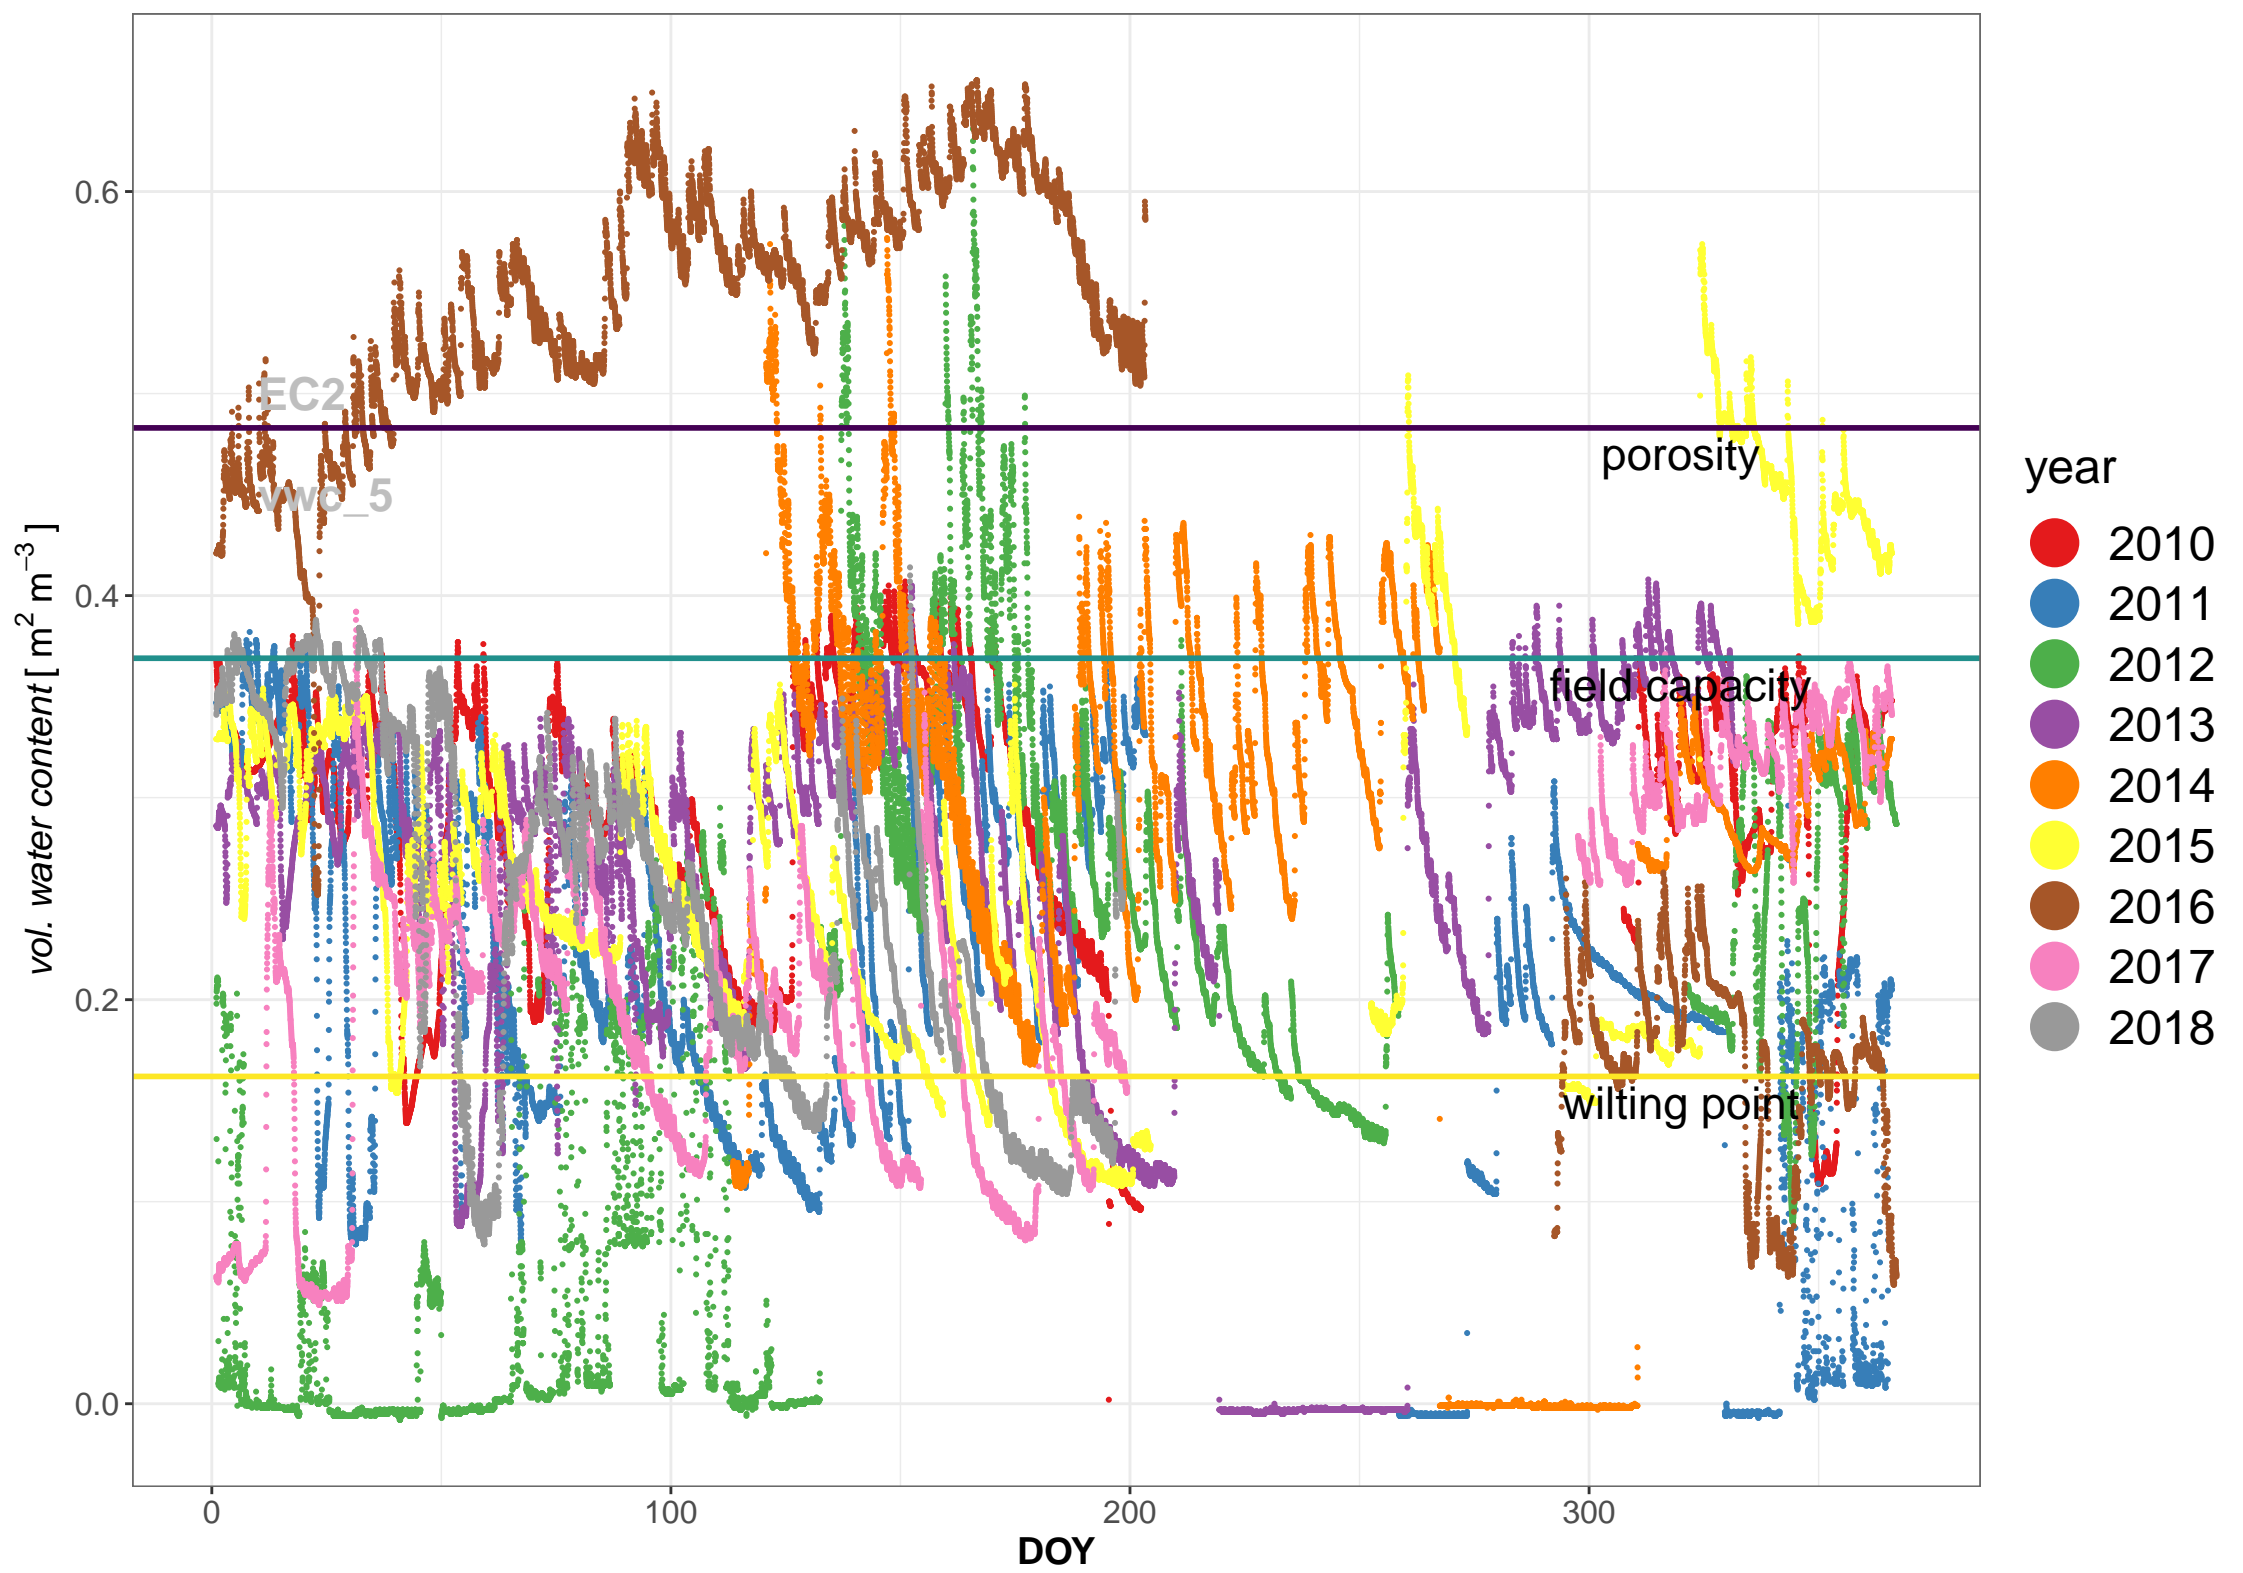

Supplement: Supplementary file 18 [file ec2vwc_5_DOY.pdf › ec2vwc_5_DOY.pdf]

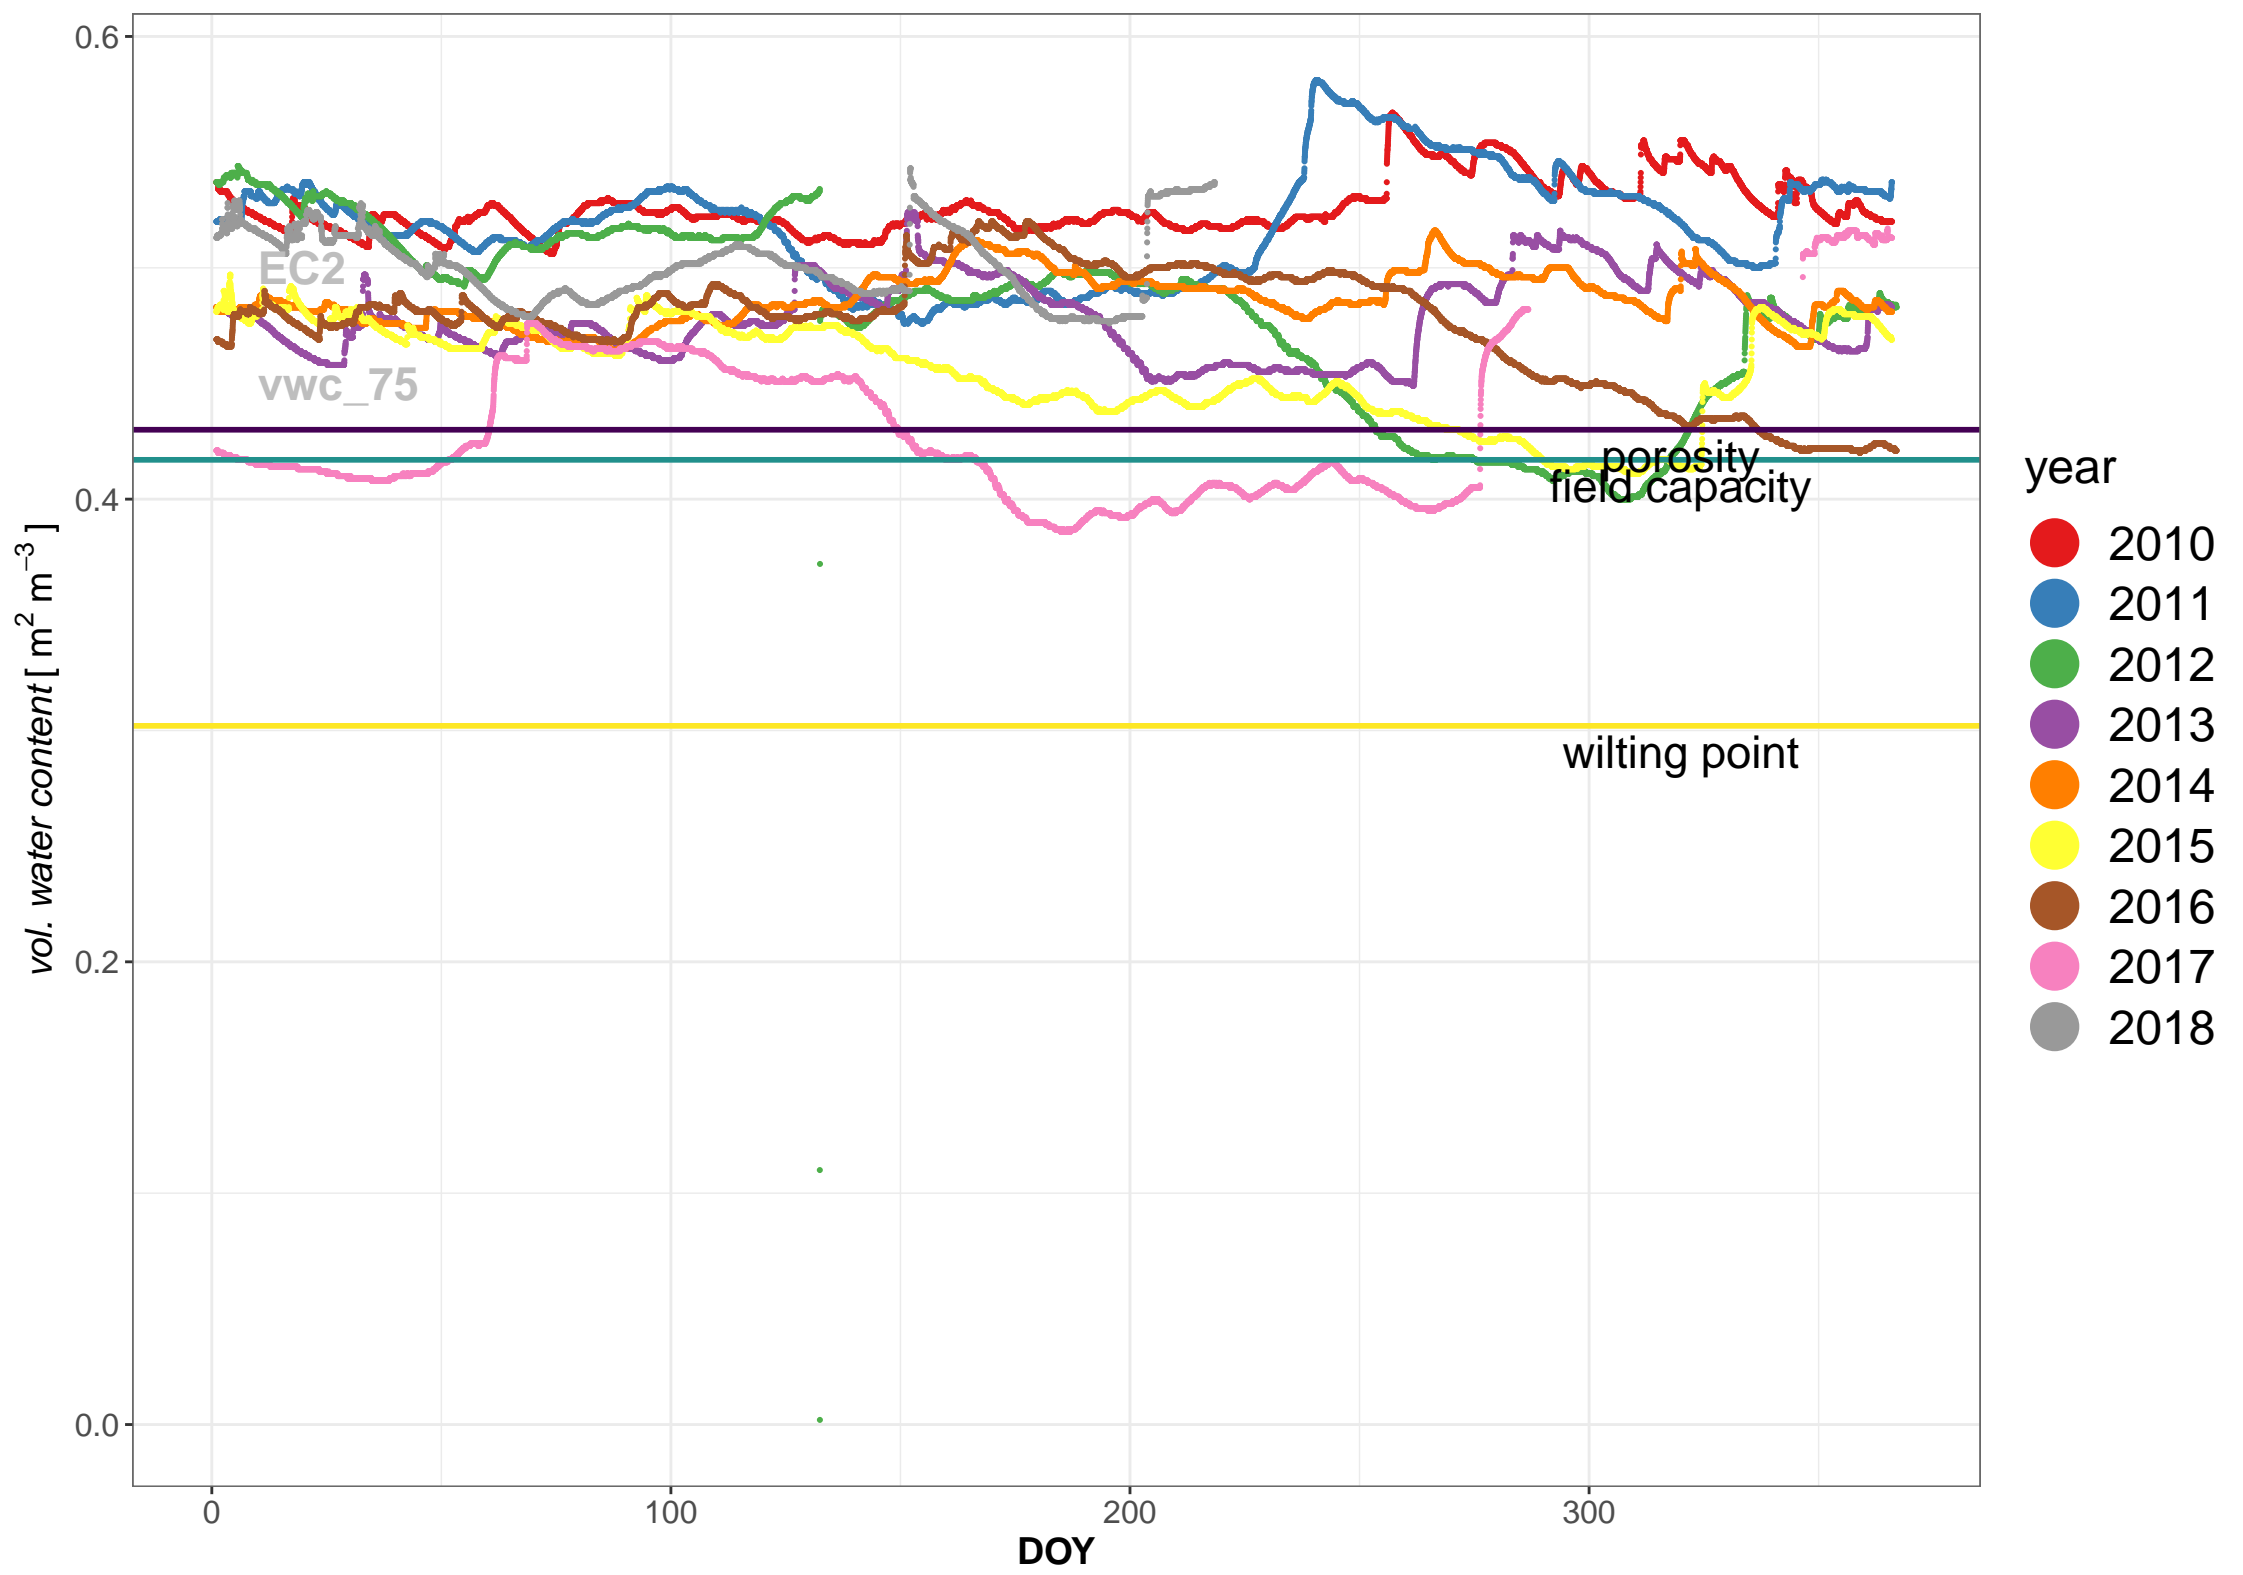

Supplement: Supplementary file 20 [file ec2vwc_75_DOY.pdf › ec2vwc_75_DOY.pdf]

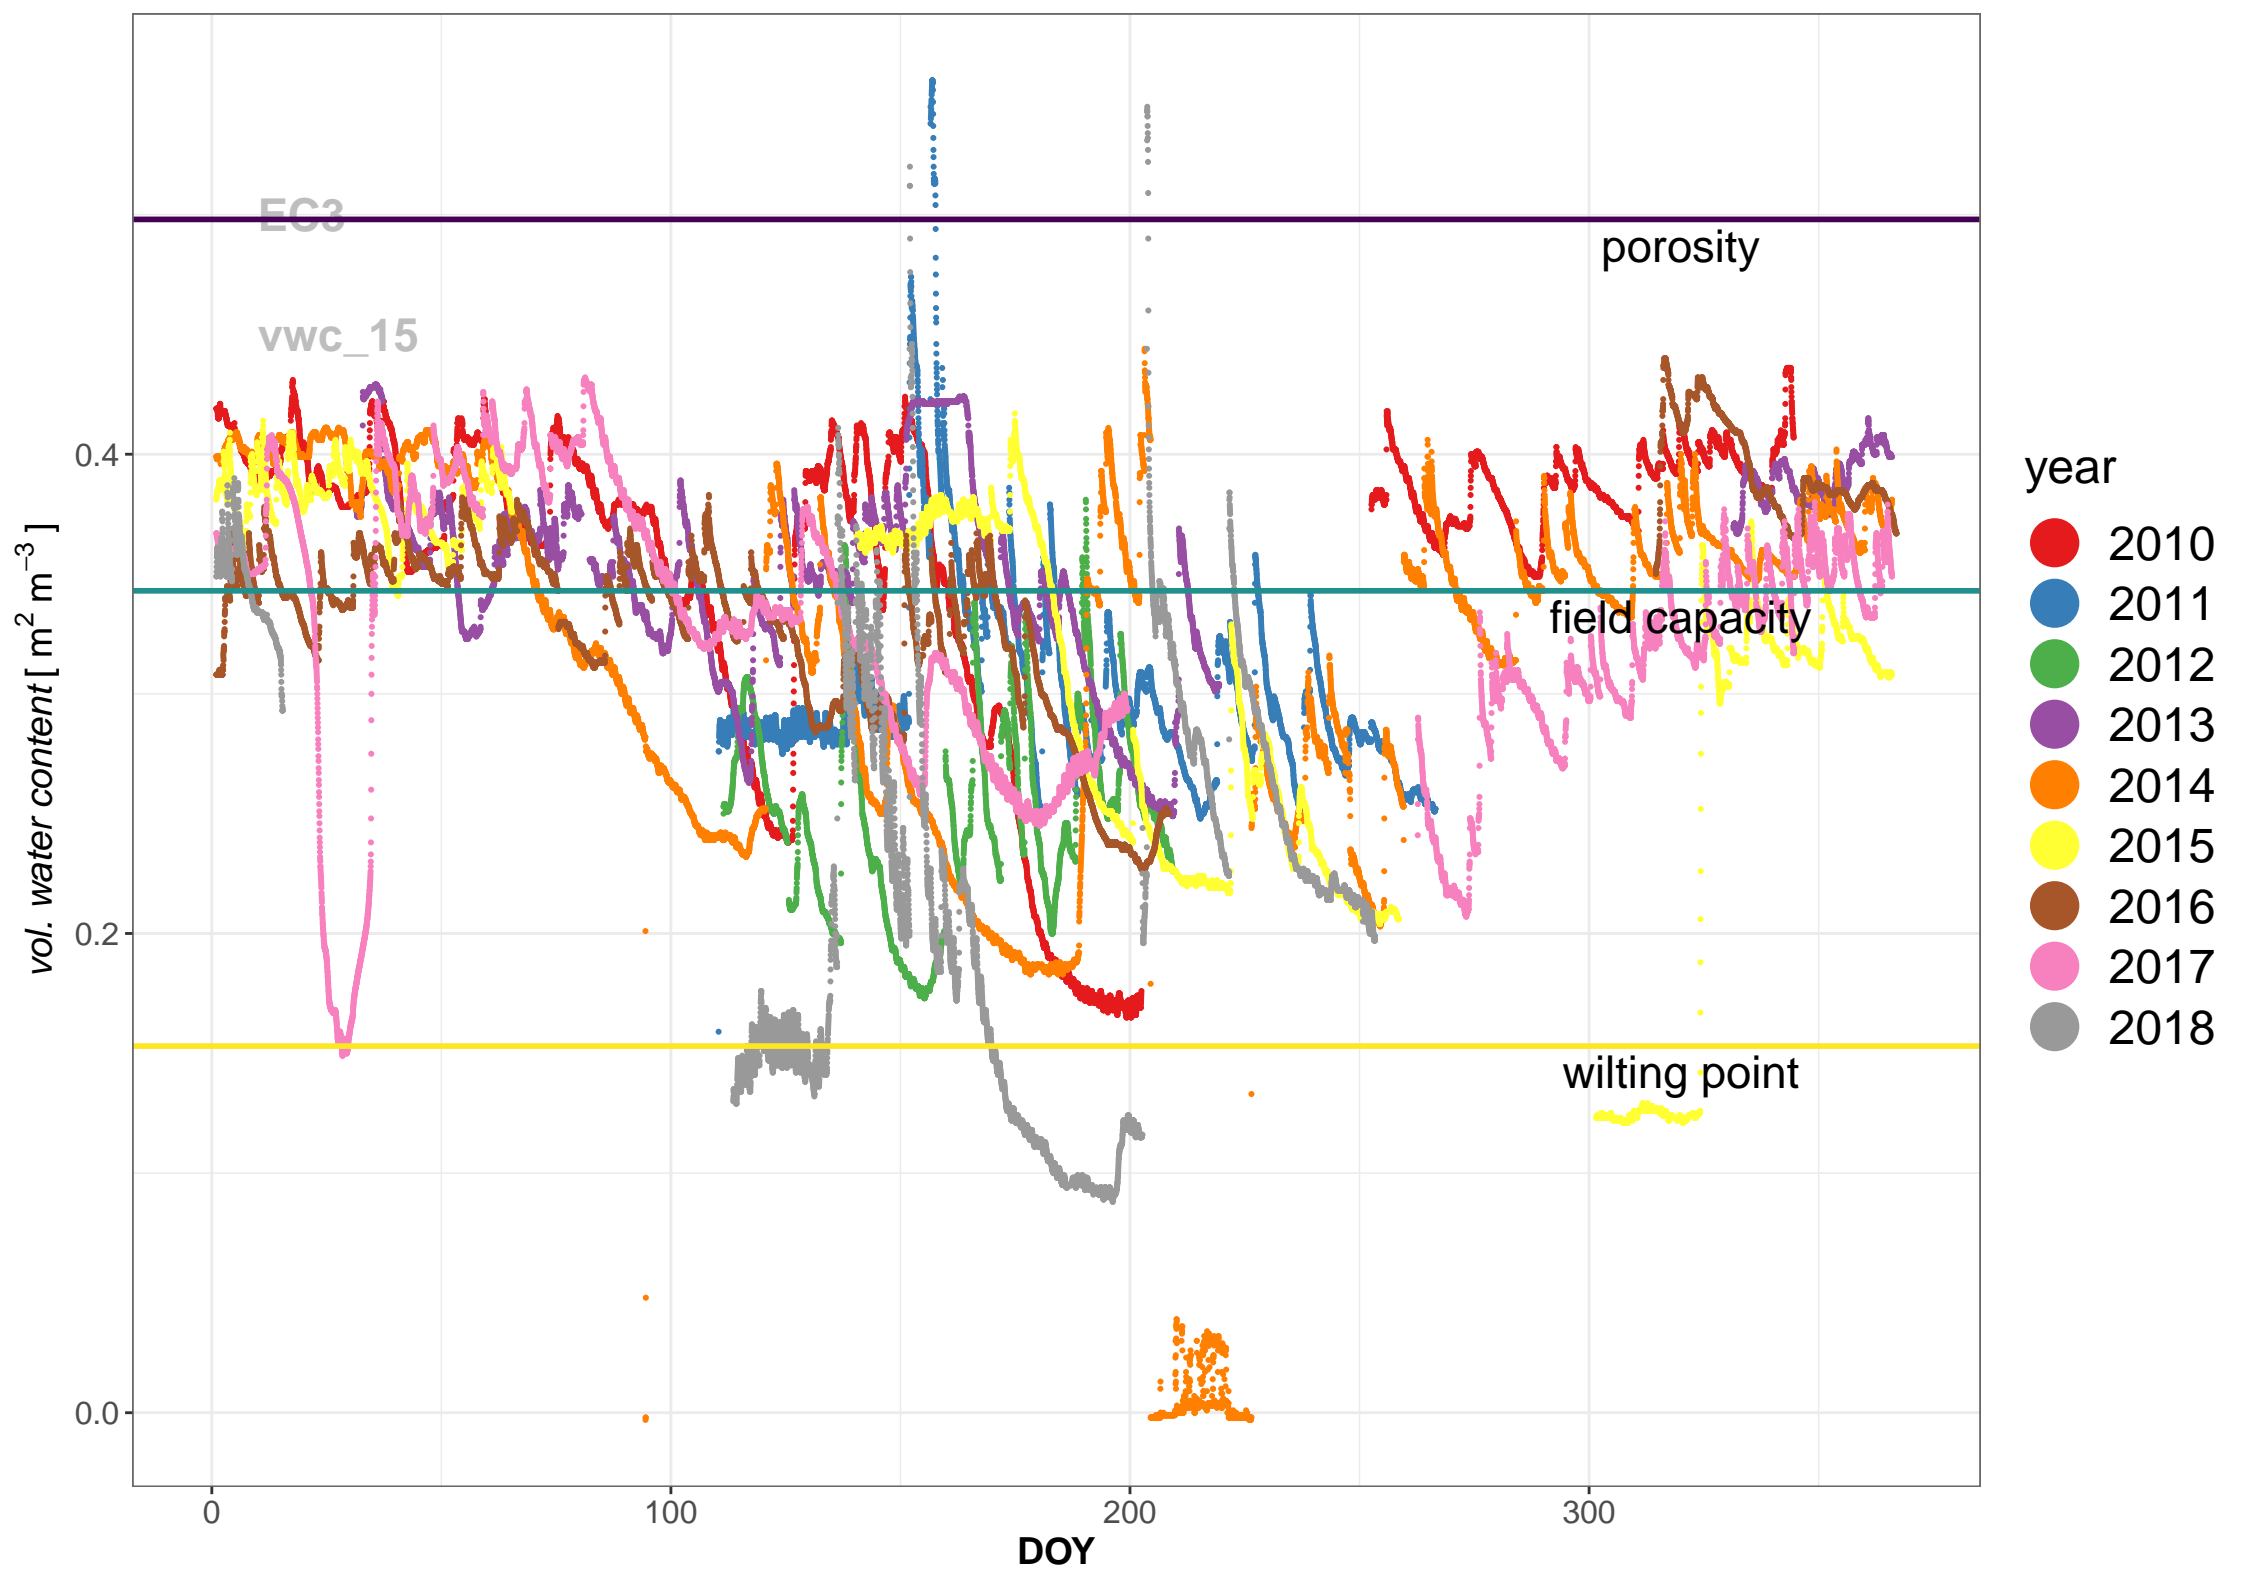

Supplement: Supplementary file 22 [file ec3vwc_15_DOY.pdf › ec3vwc_15_DOY.pdf]

ec3 2010  
depth 30 cm

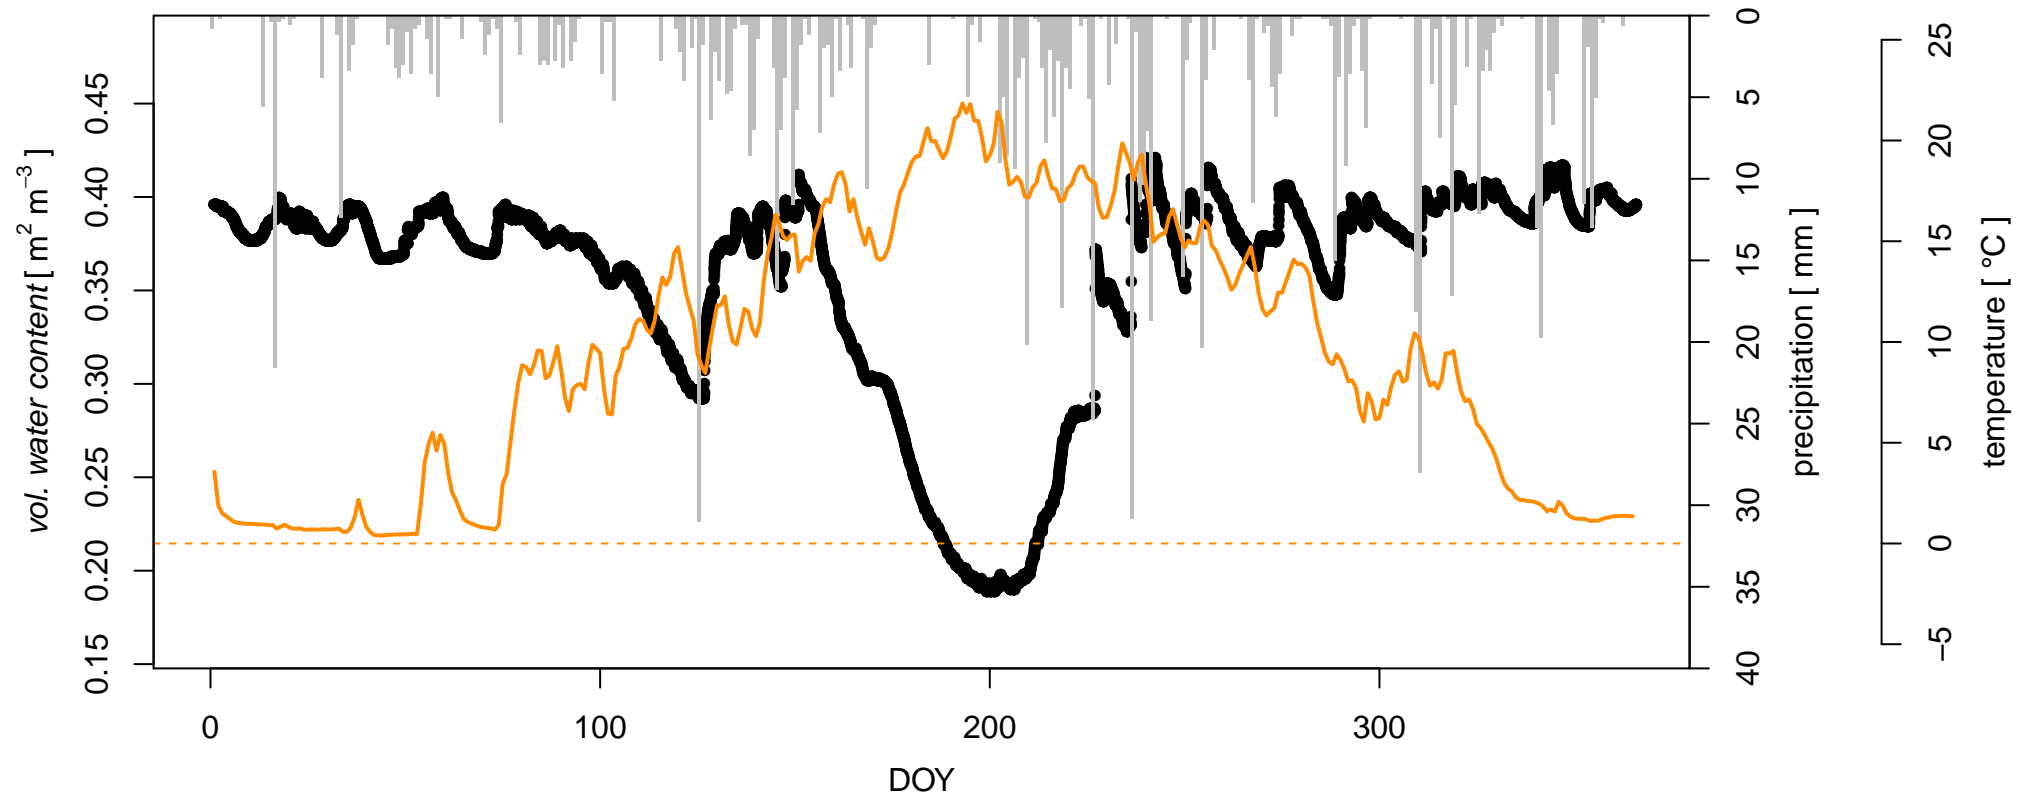

ec3 2011  
depth 30 cm

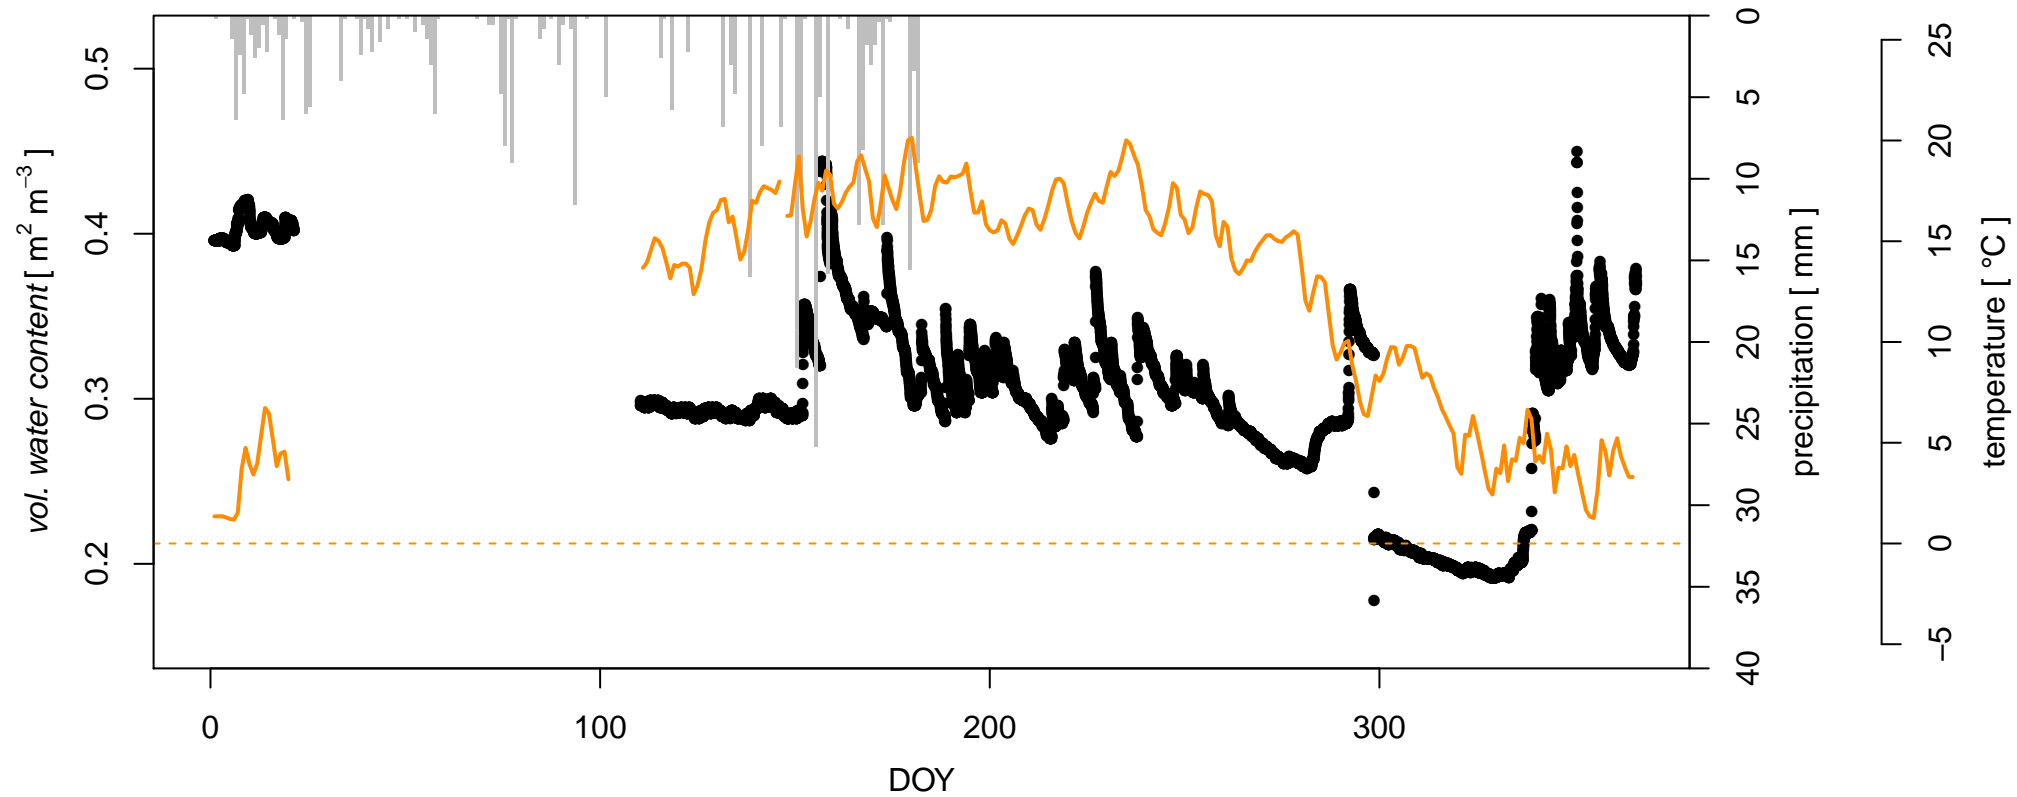

ec3 2012  
depth 30 cm

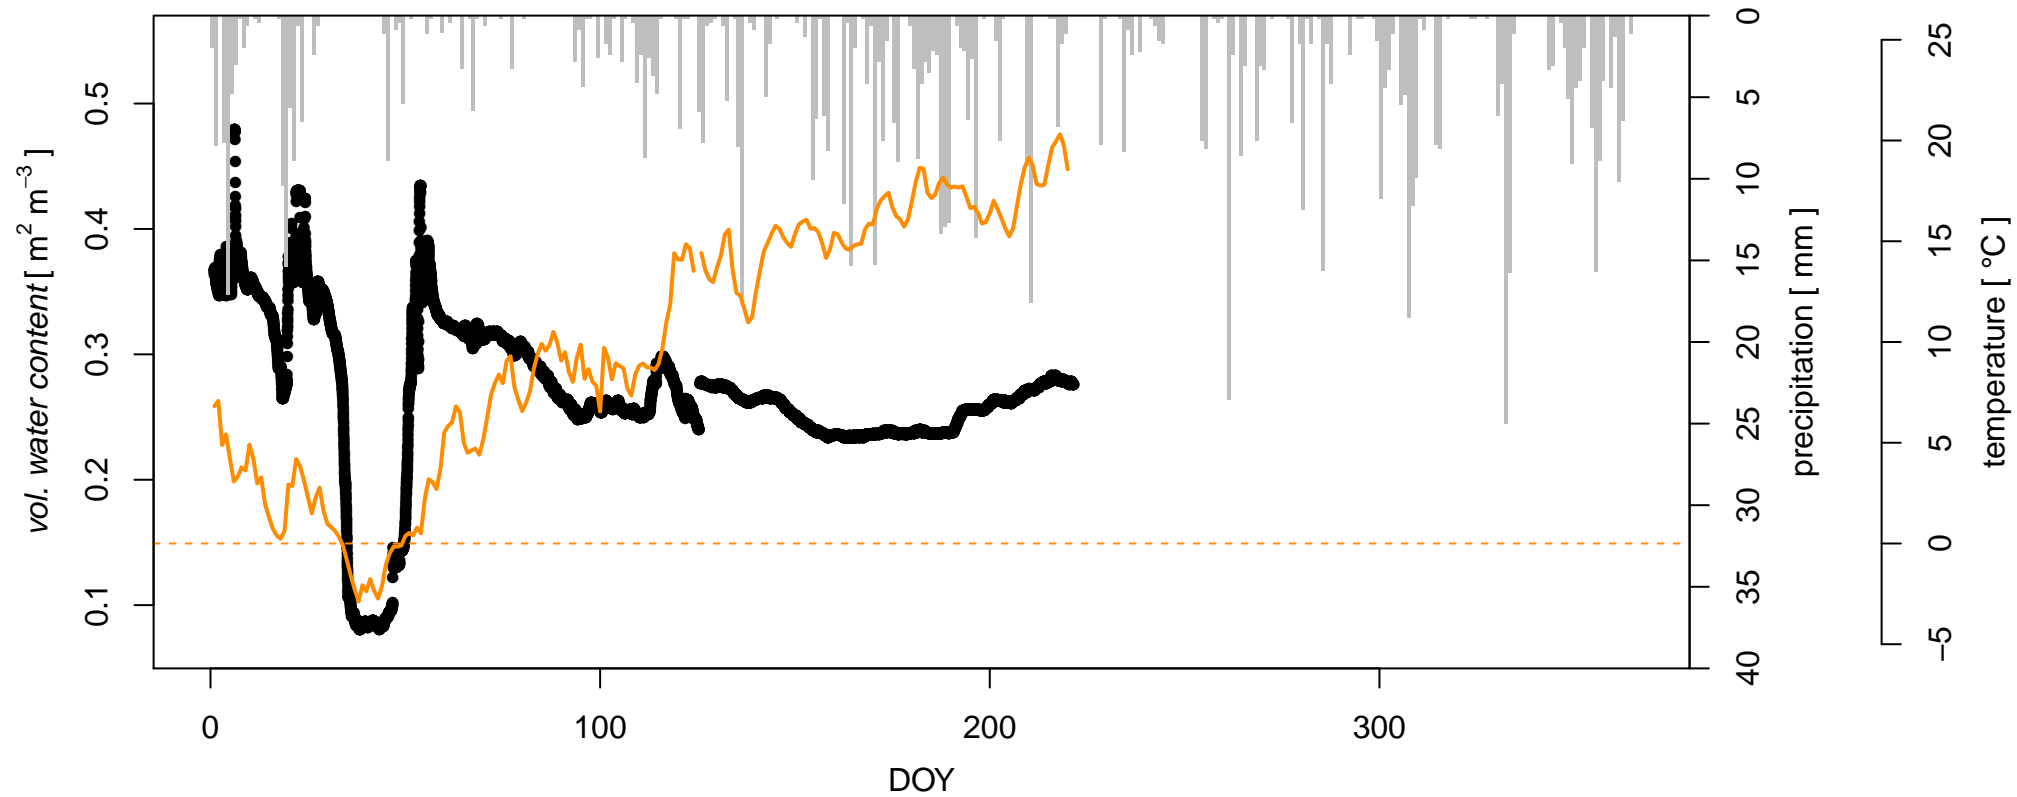

ec3 2014  
depth 30 cm

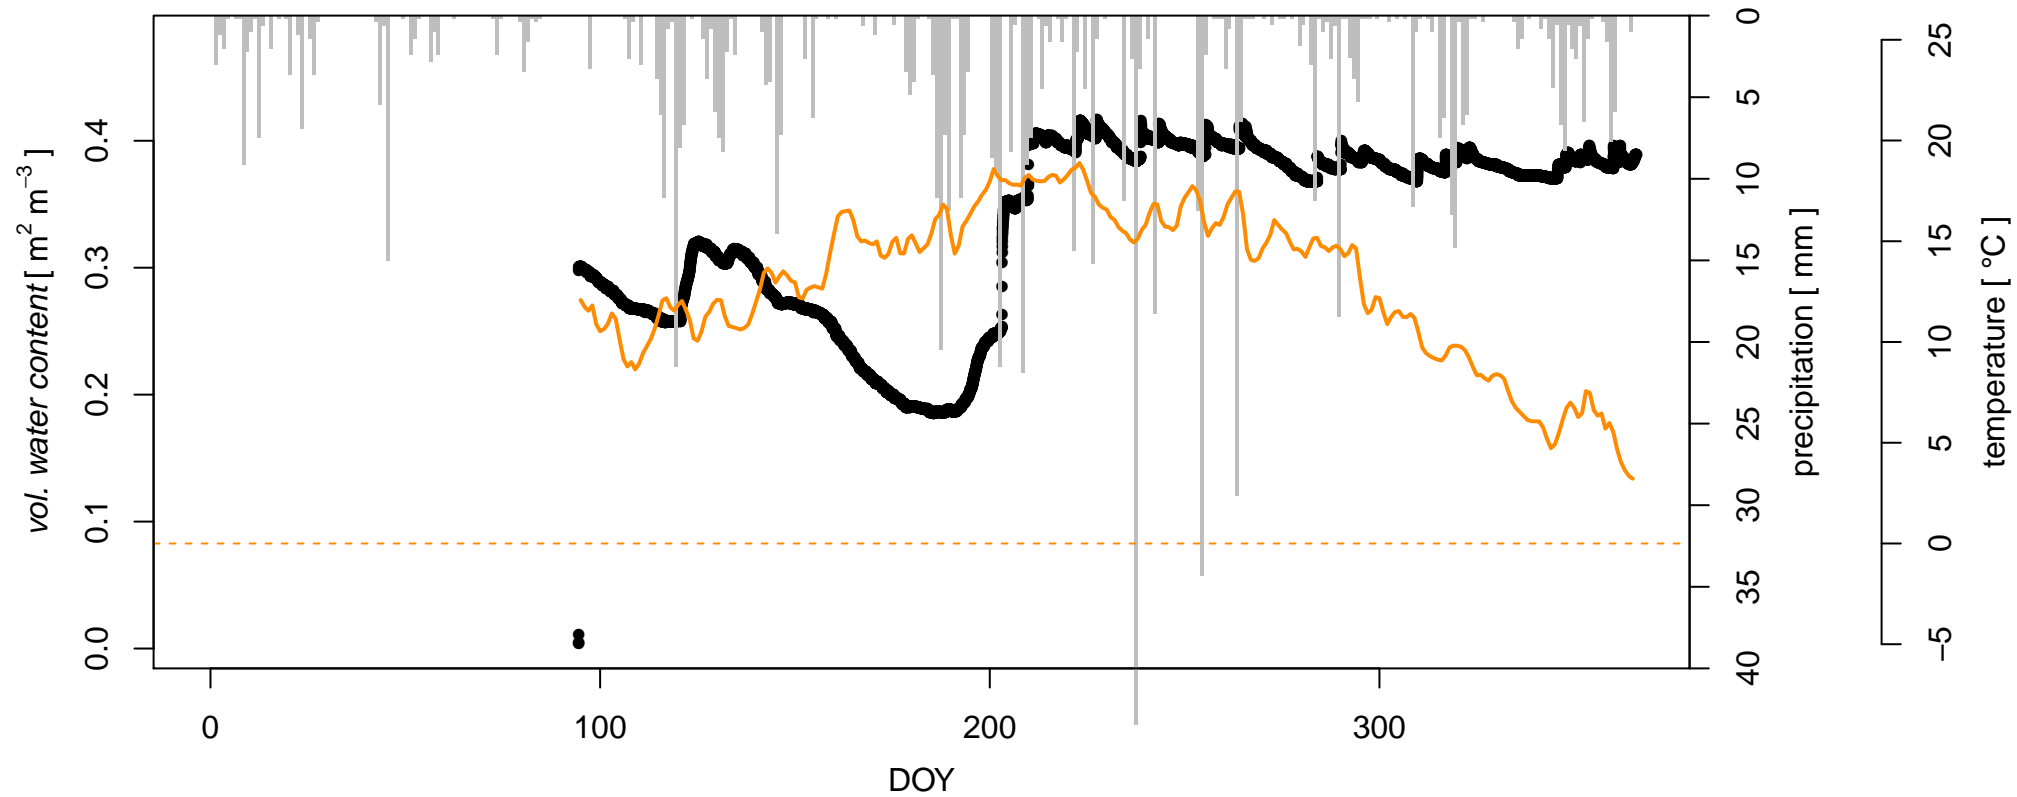

ec3 2015  
depth 30 cm

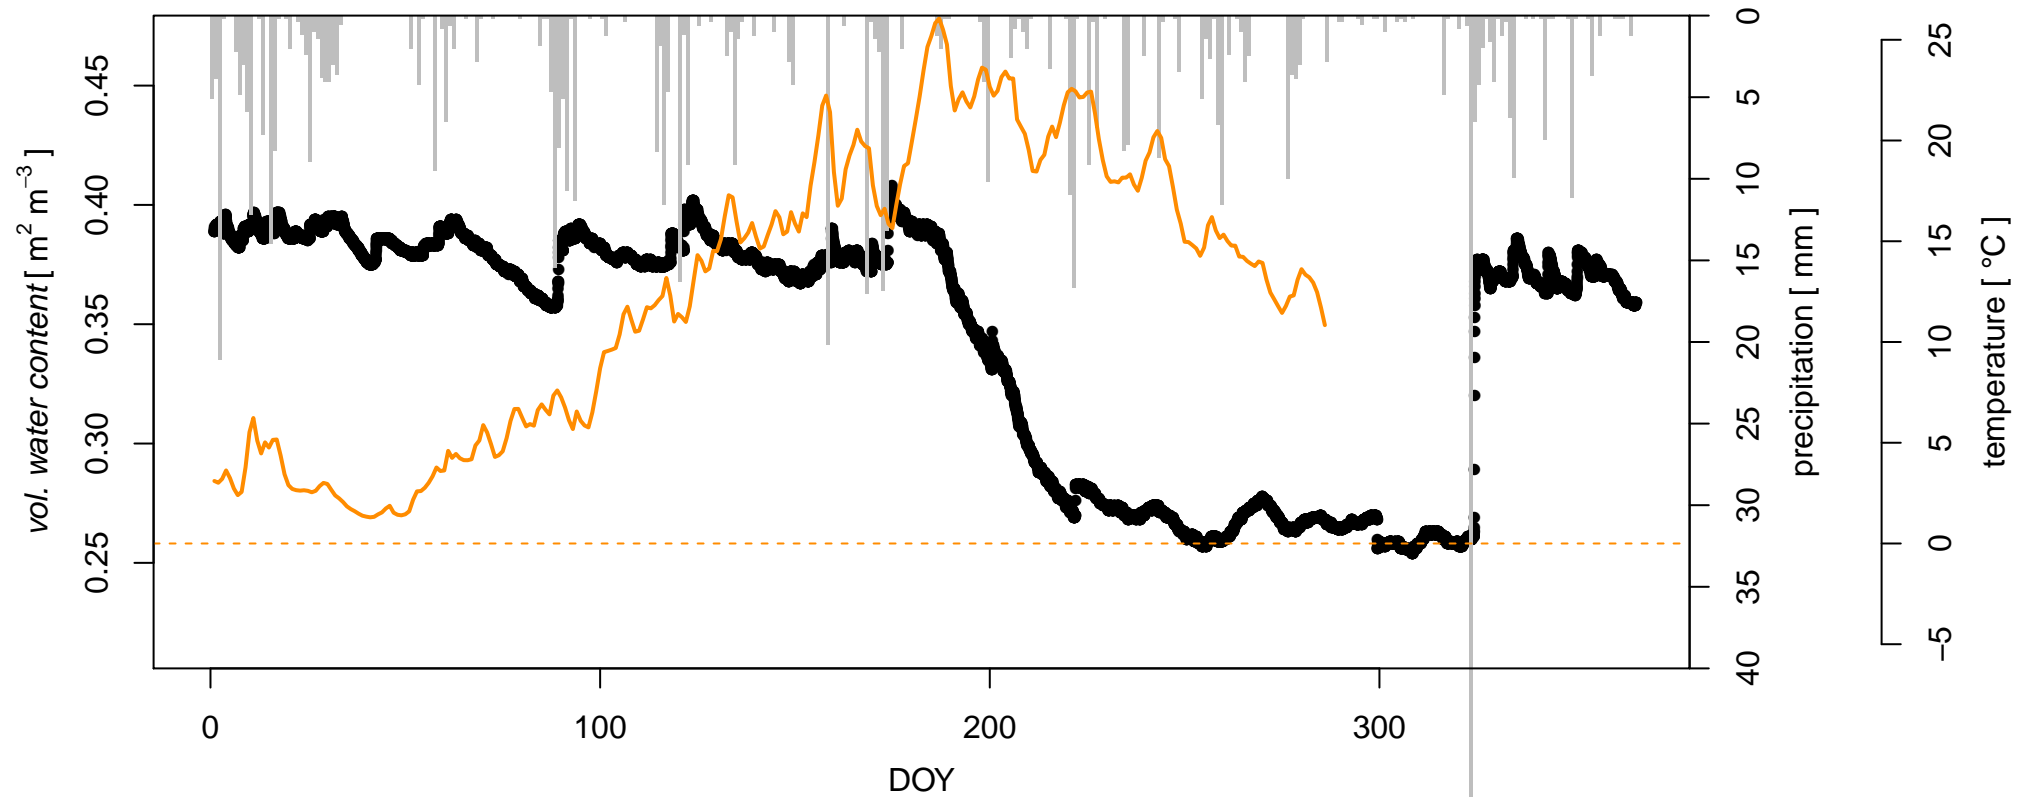

ec3 2016  
depth 30 cm

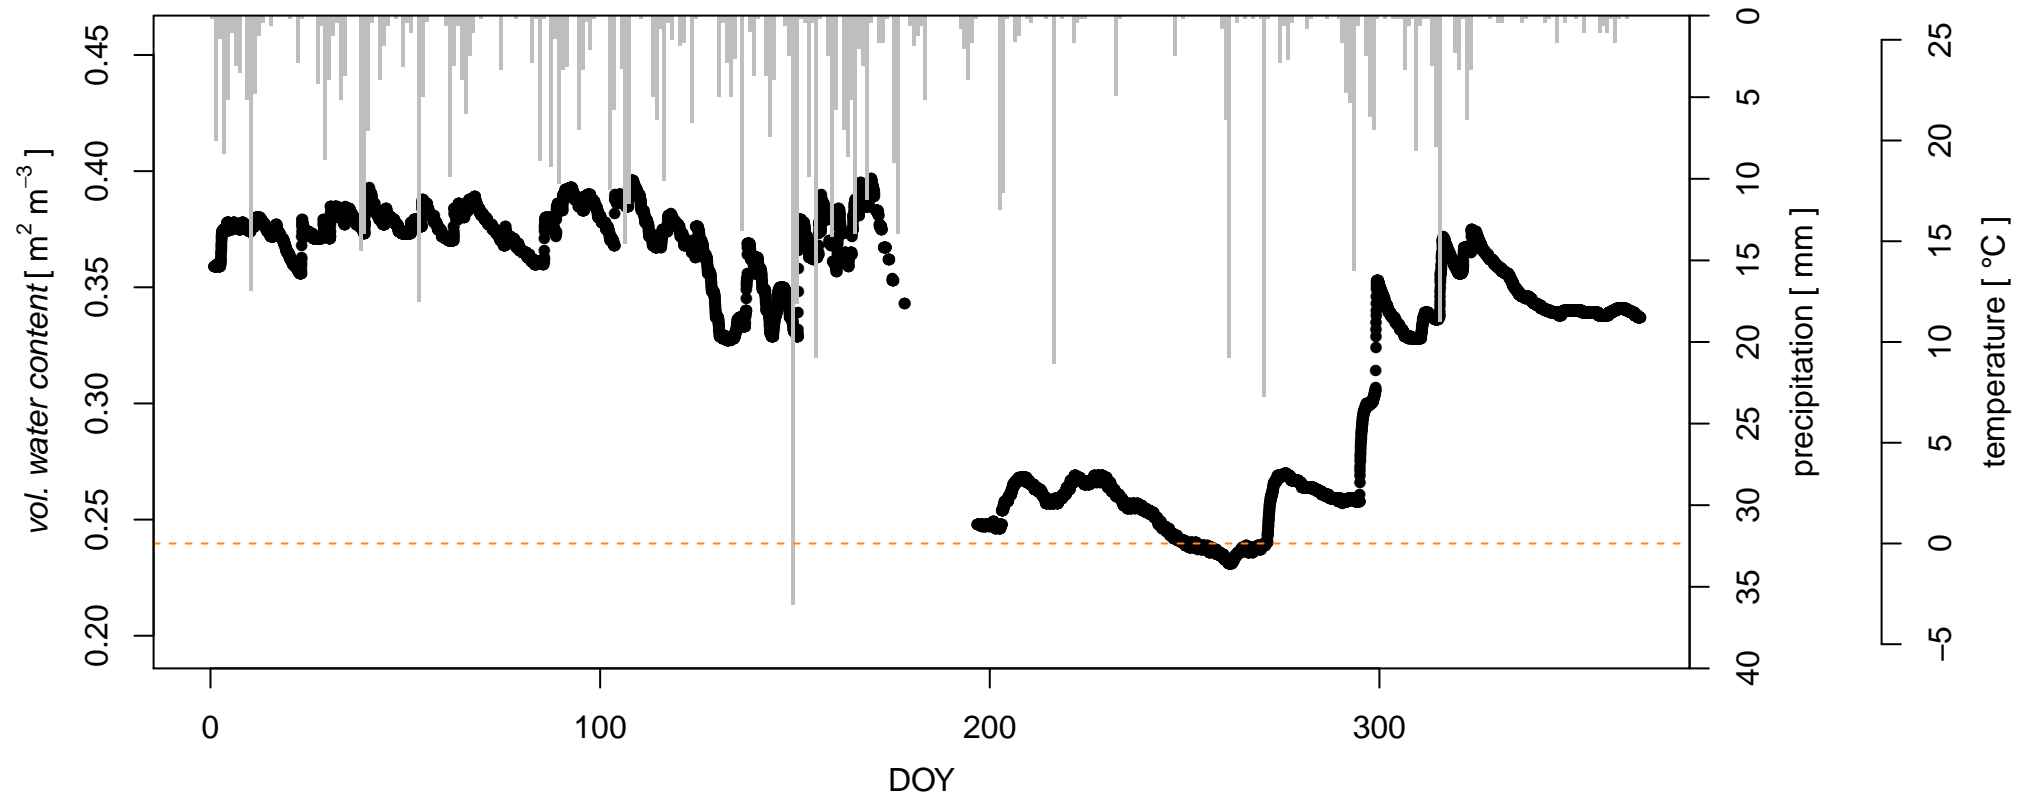

ec3 2017  
depth 30 cm

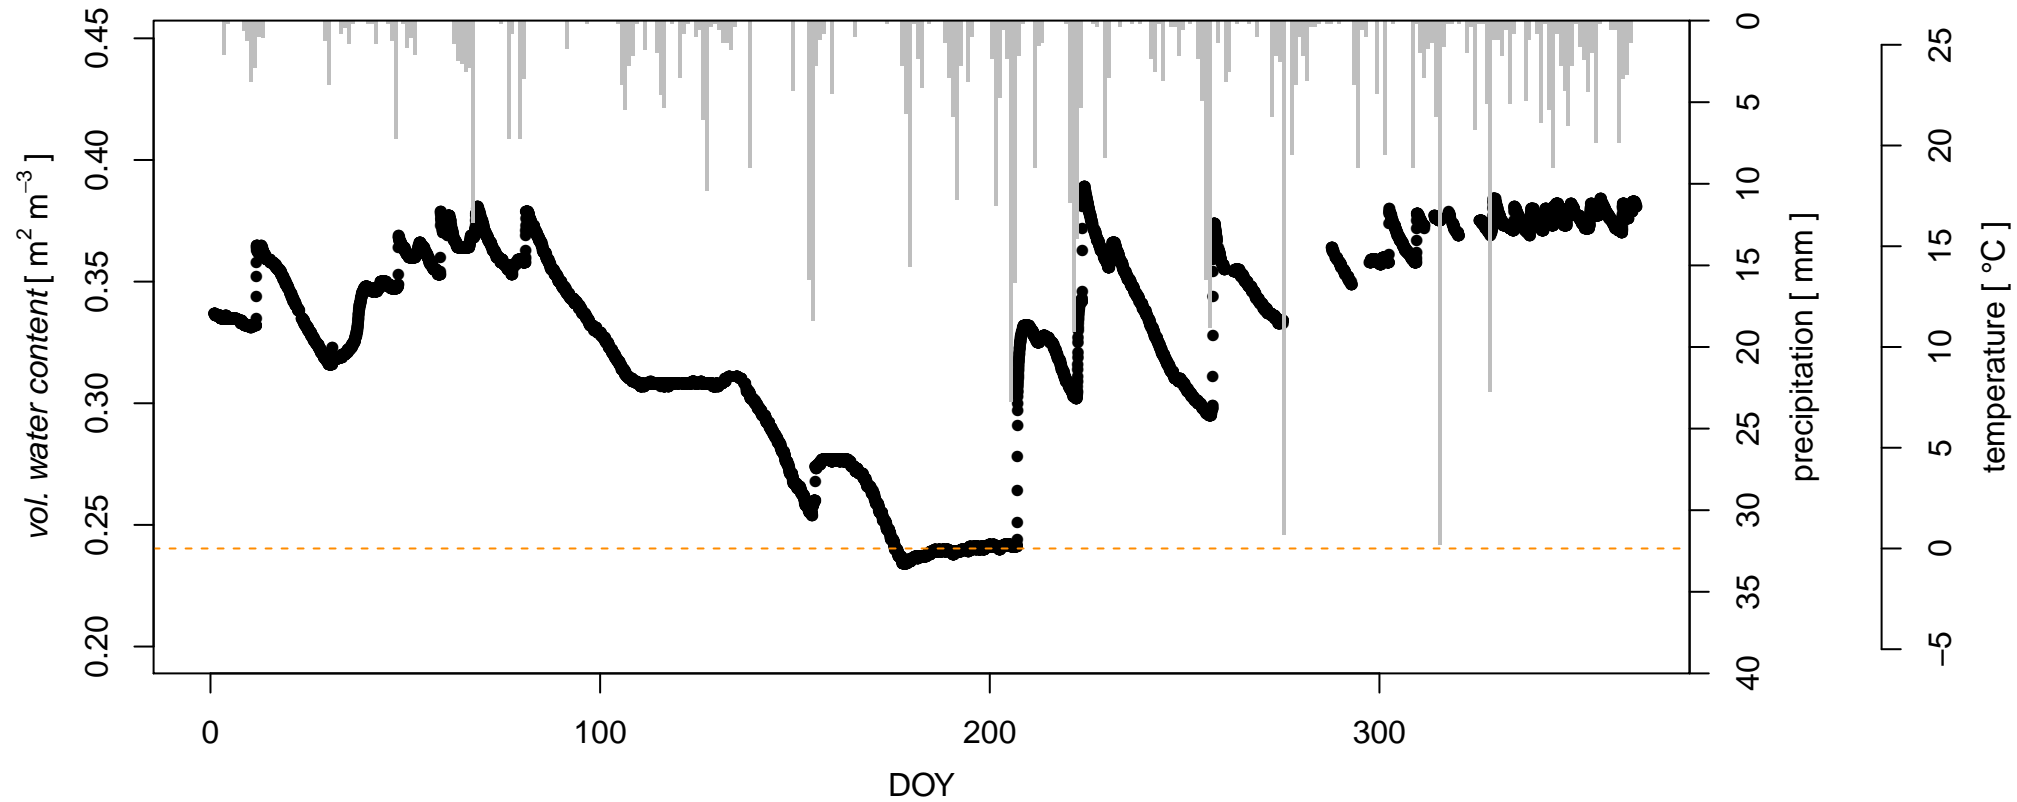

ec3 2018  
depth 30 cm

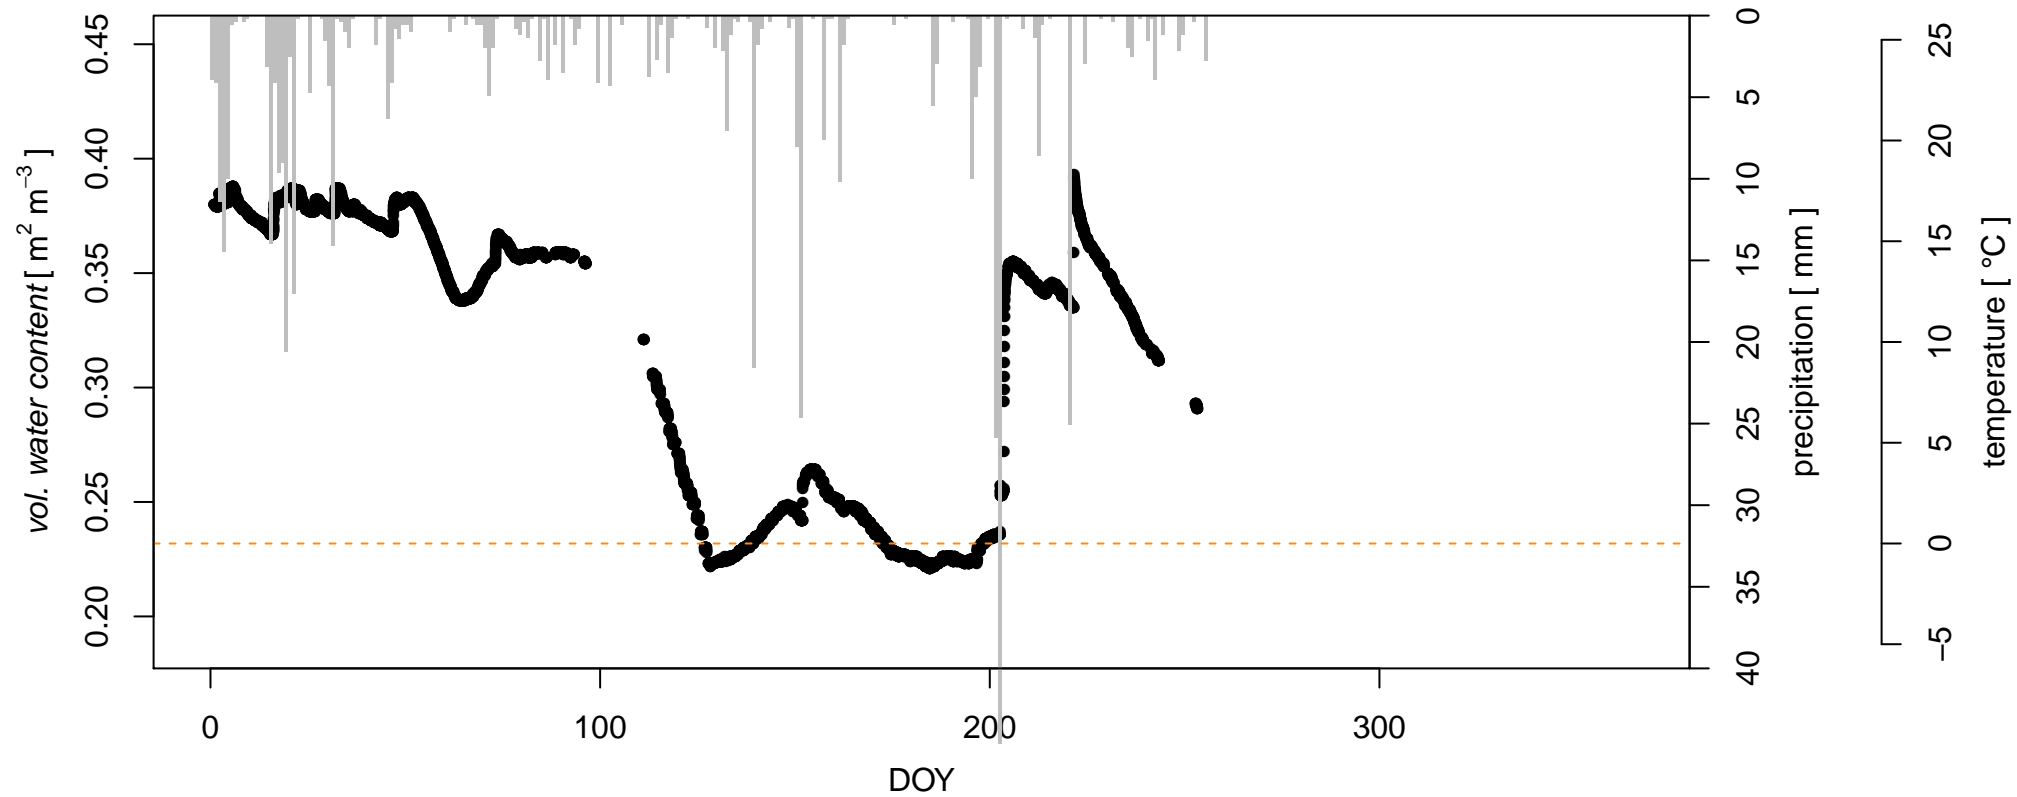

Supplement: Supplementary file 23 [file ec3vwc_30.pdf › ec3vwc_30.pdf]

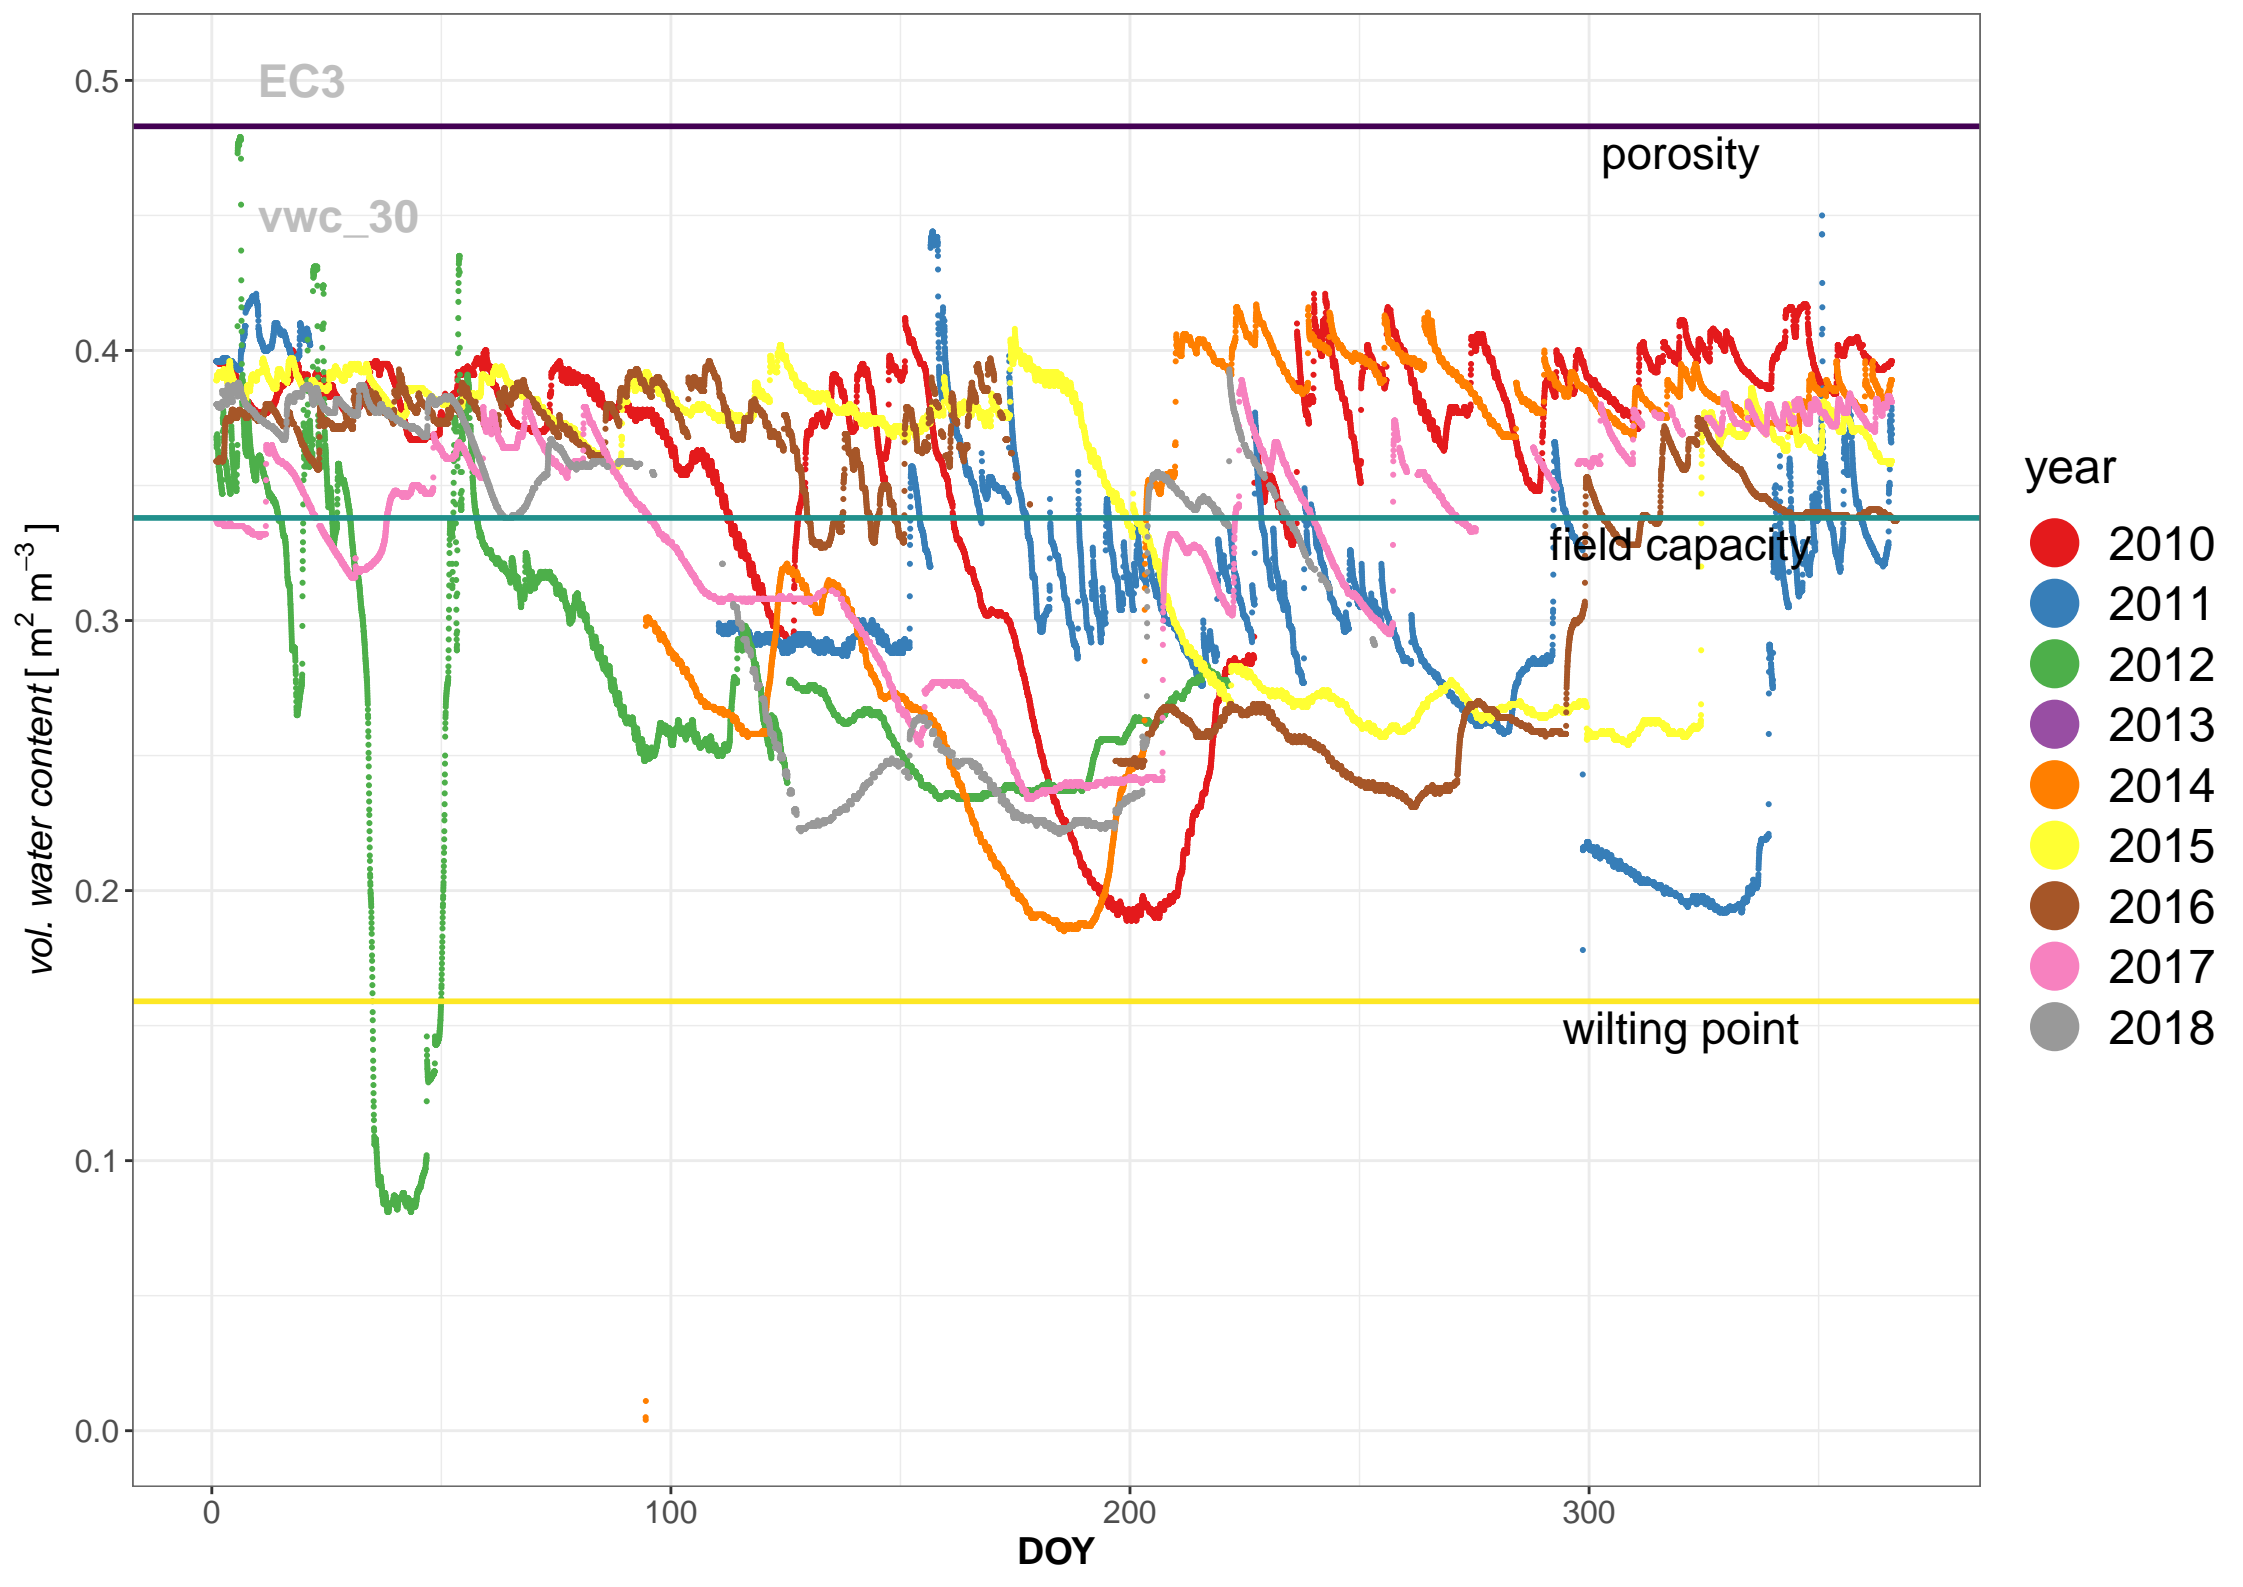

Supplement: Supplementary file 24 [file ec3vwc_30_DOY.pdf › ec3vwc_30_DOY.pdf]

ec3 2010  
depth 45 cm

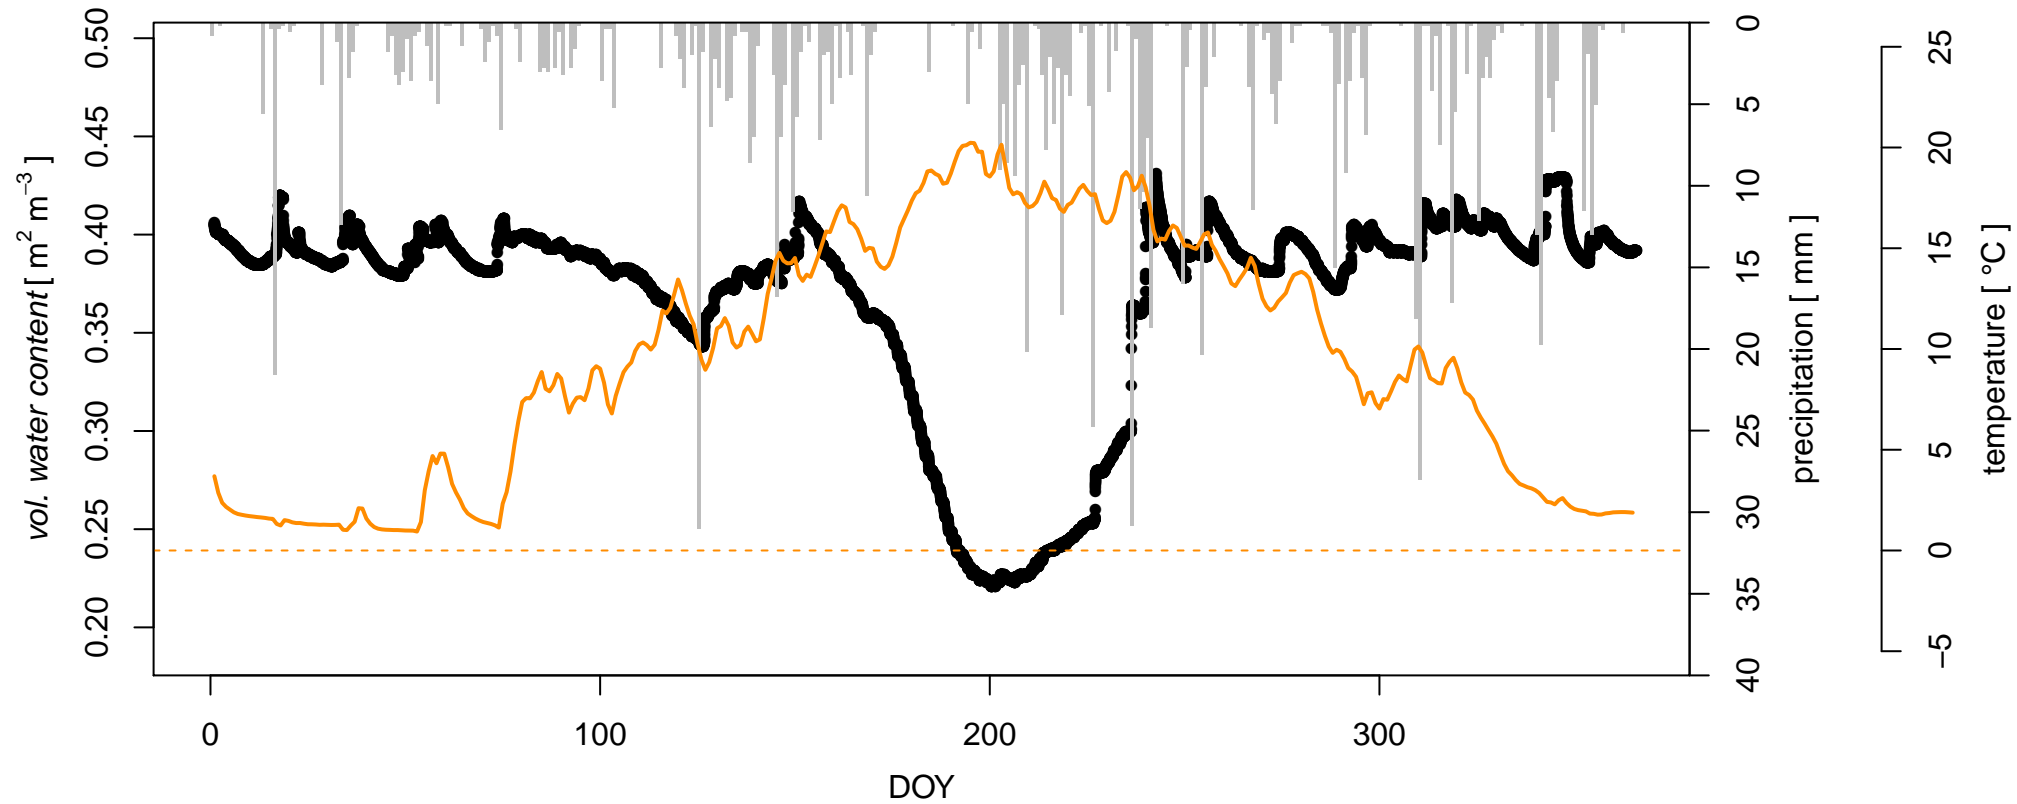

ec3 2011  
depth 45 cm

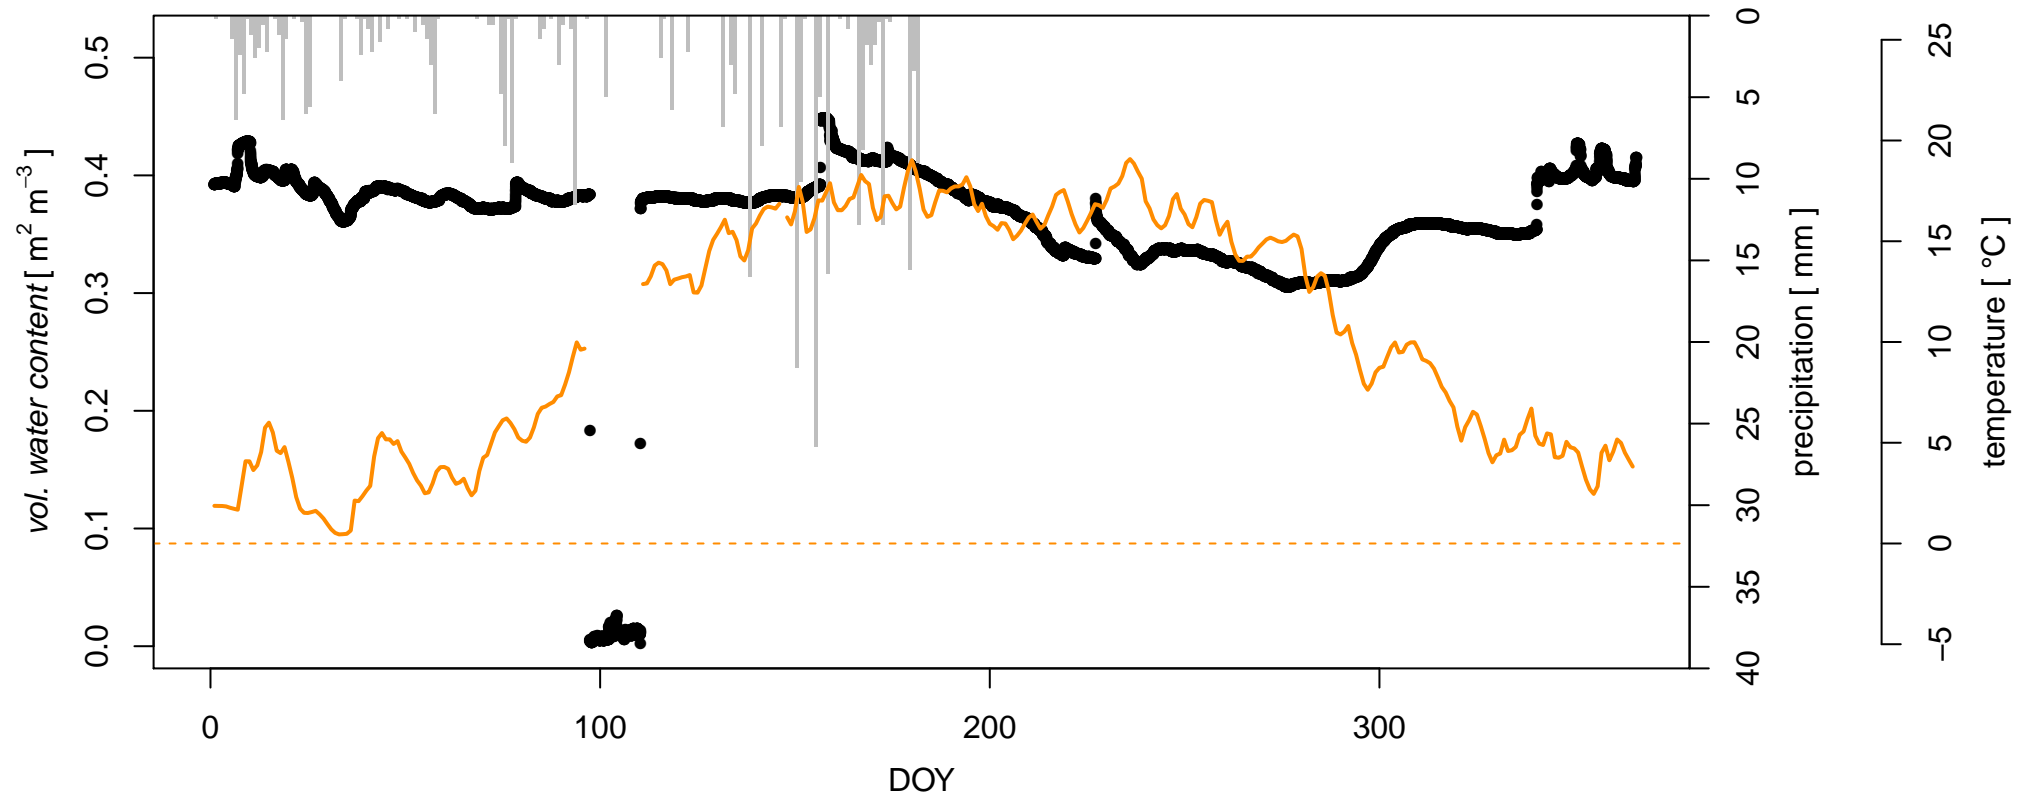

ec3 2012  
depth 45 cm

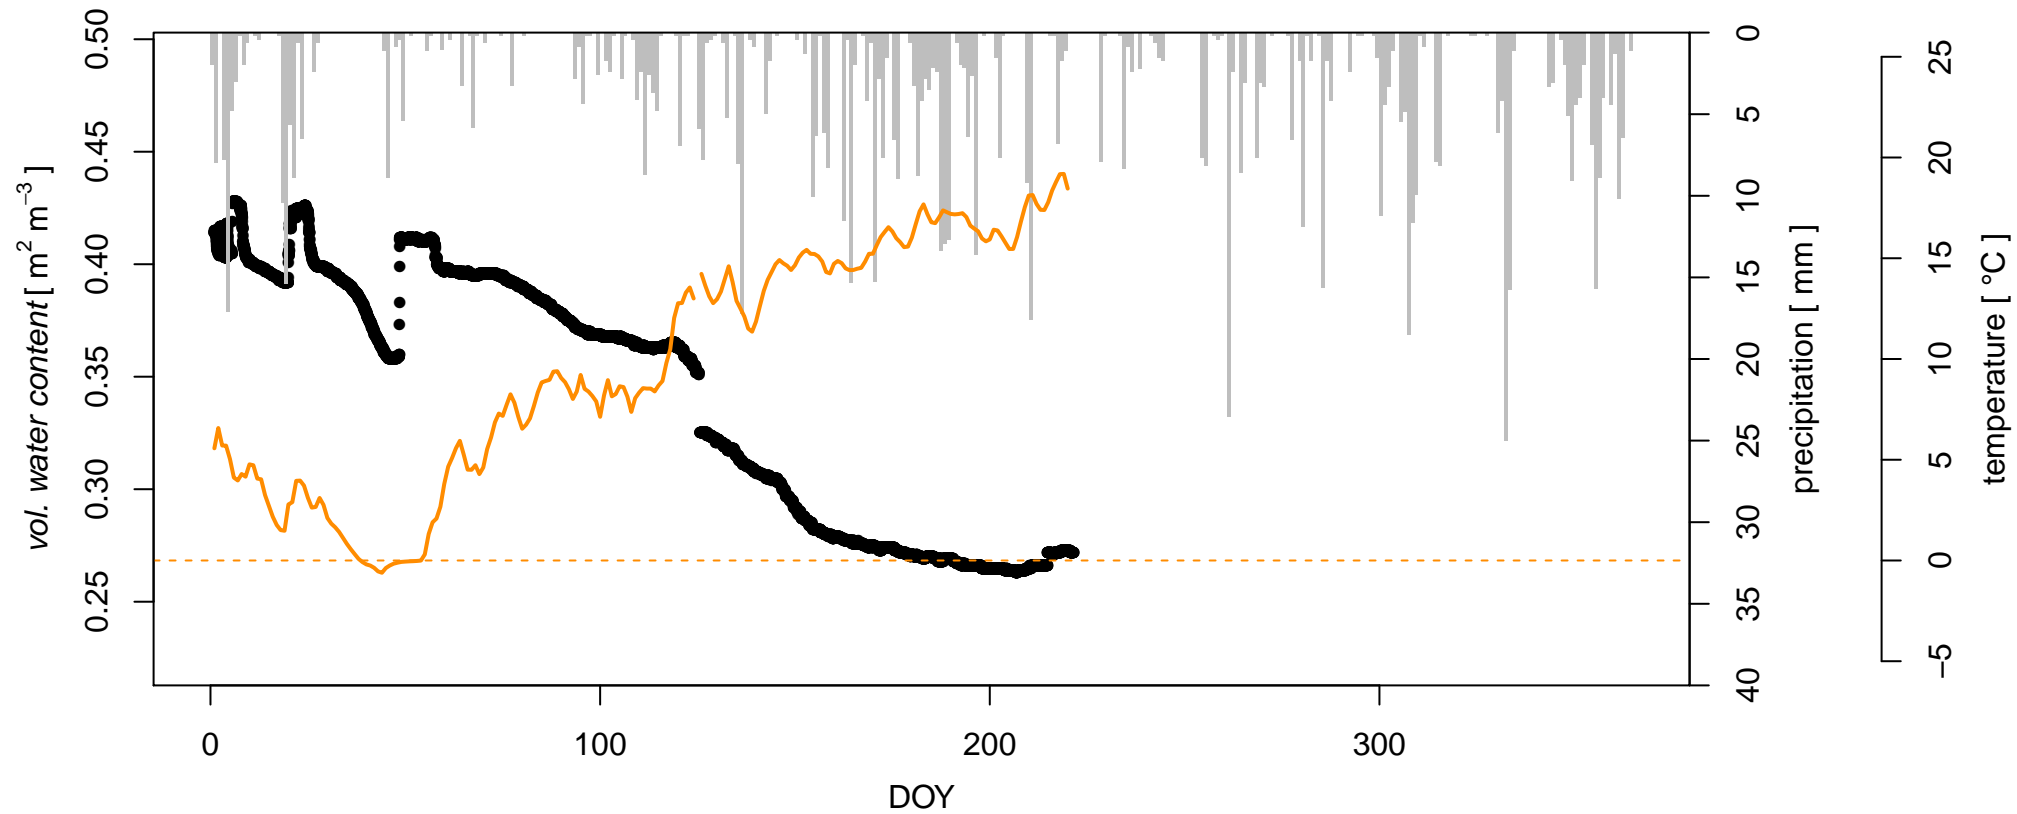

ec3 2014  
depth 45 cm

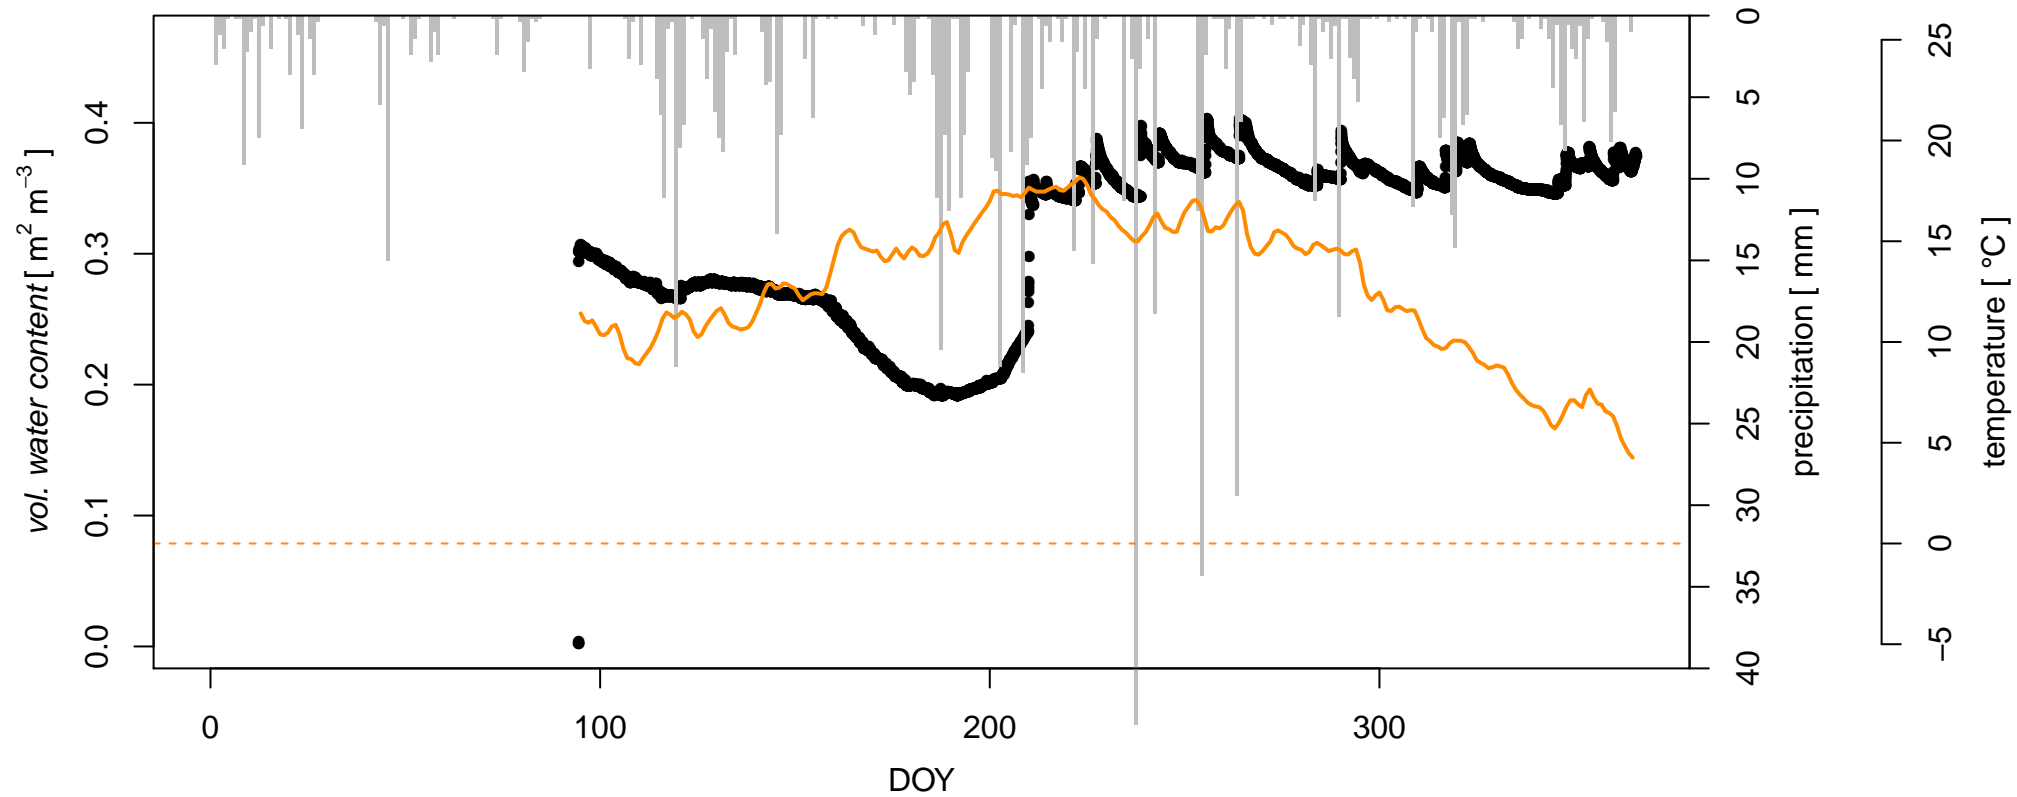

ec3 2015  
depth 45 cm

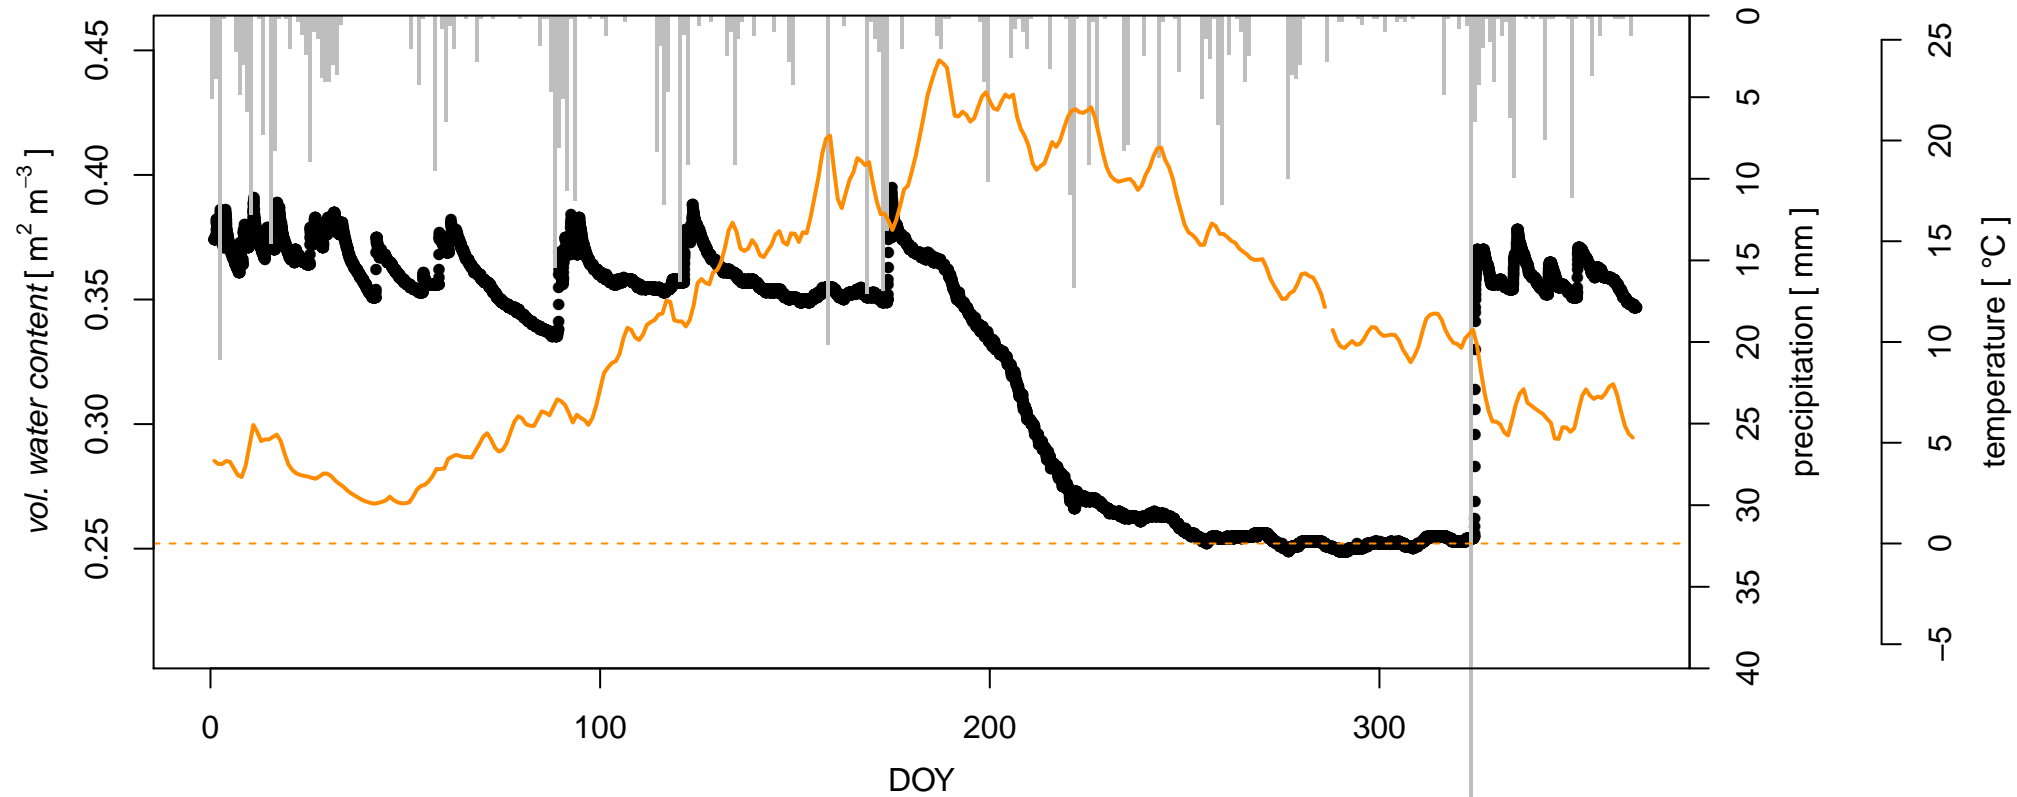

ec3 2016  
depth 45 cm

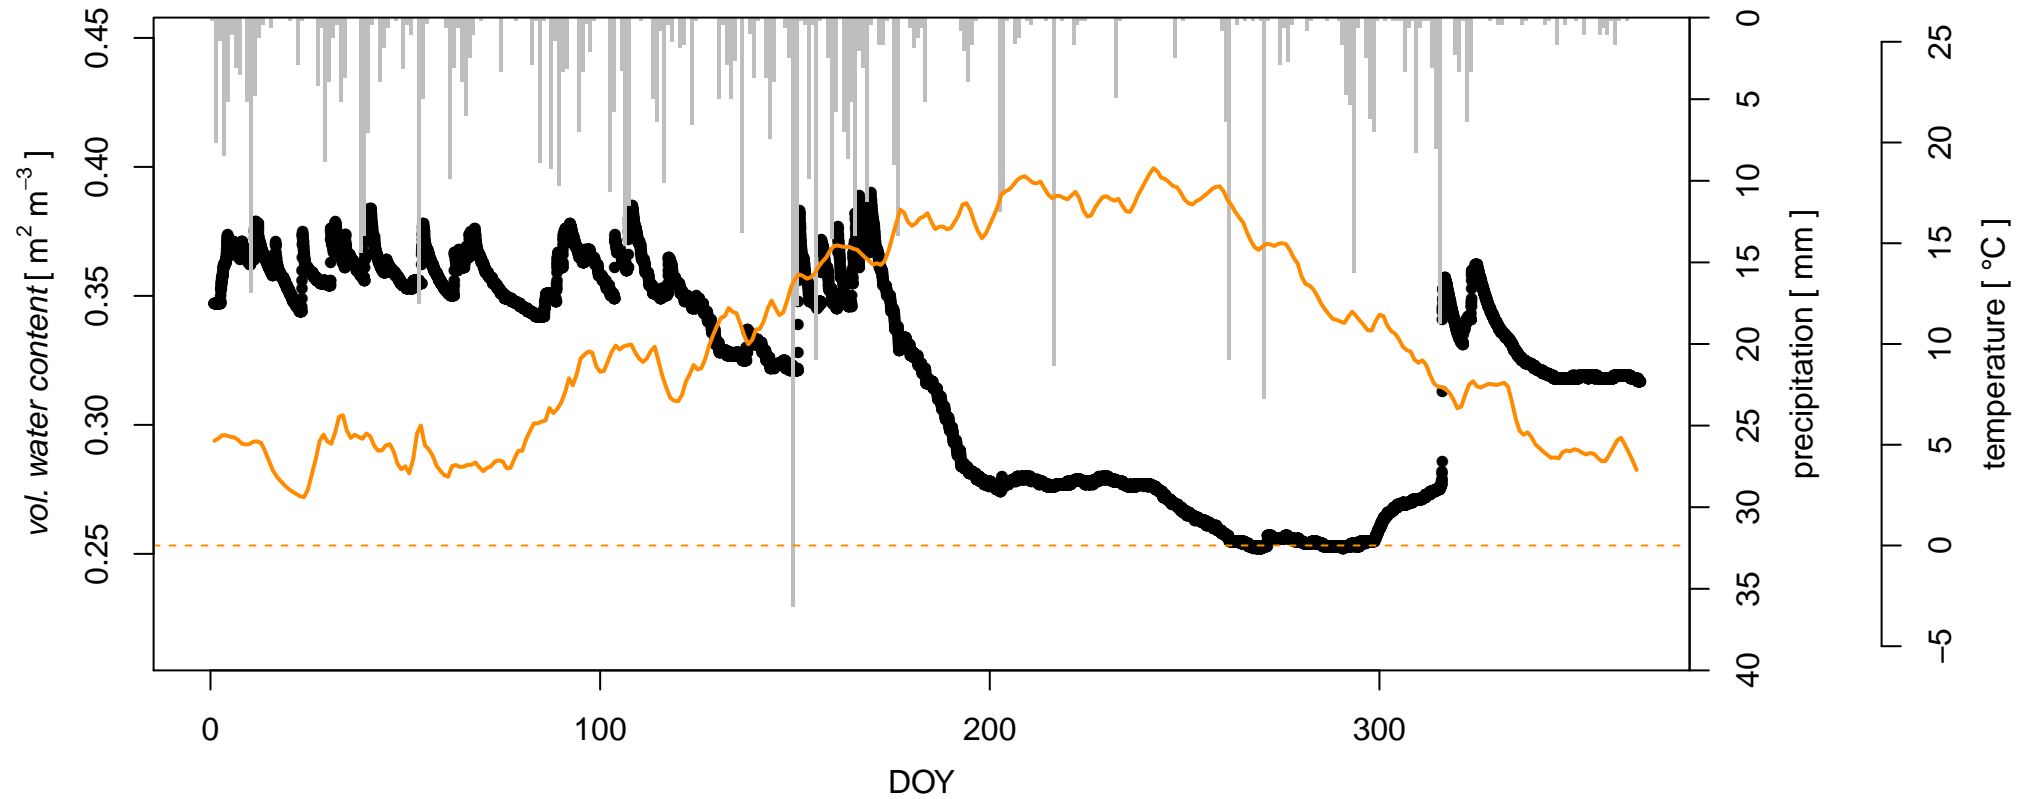

ec3 2017  
depth 45 cm

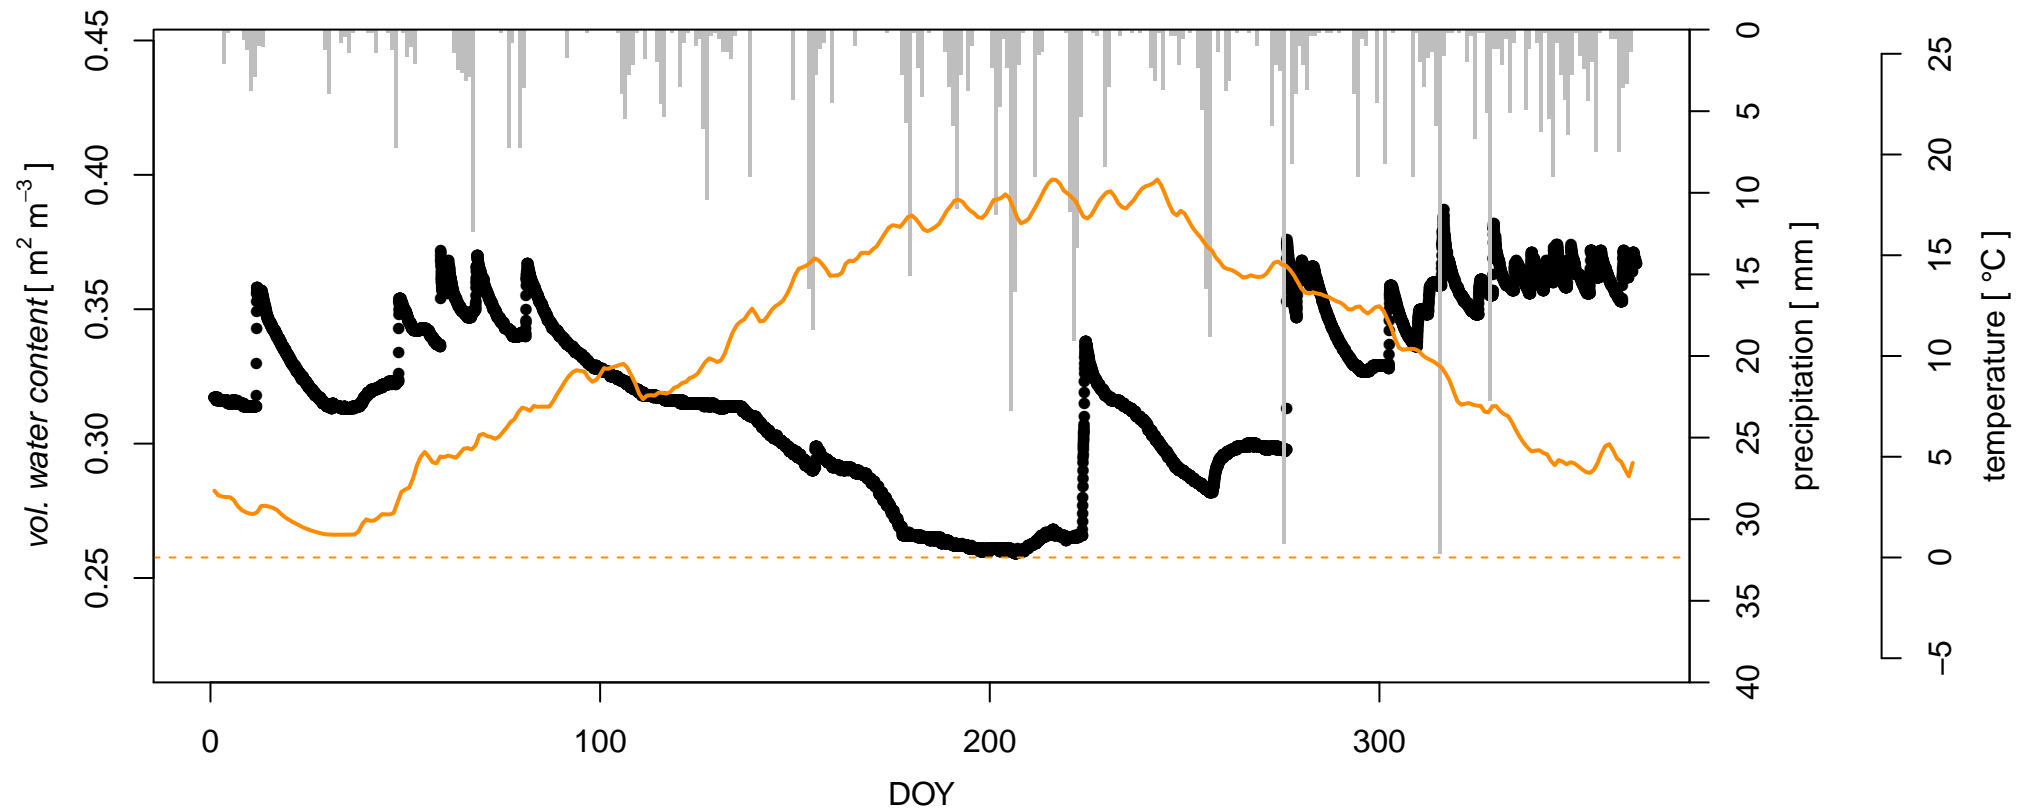

ec3 2018  
depth 45 cm

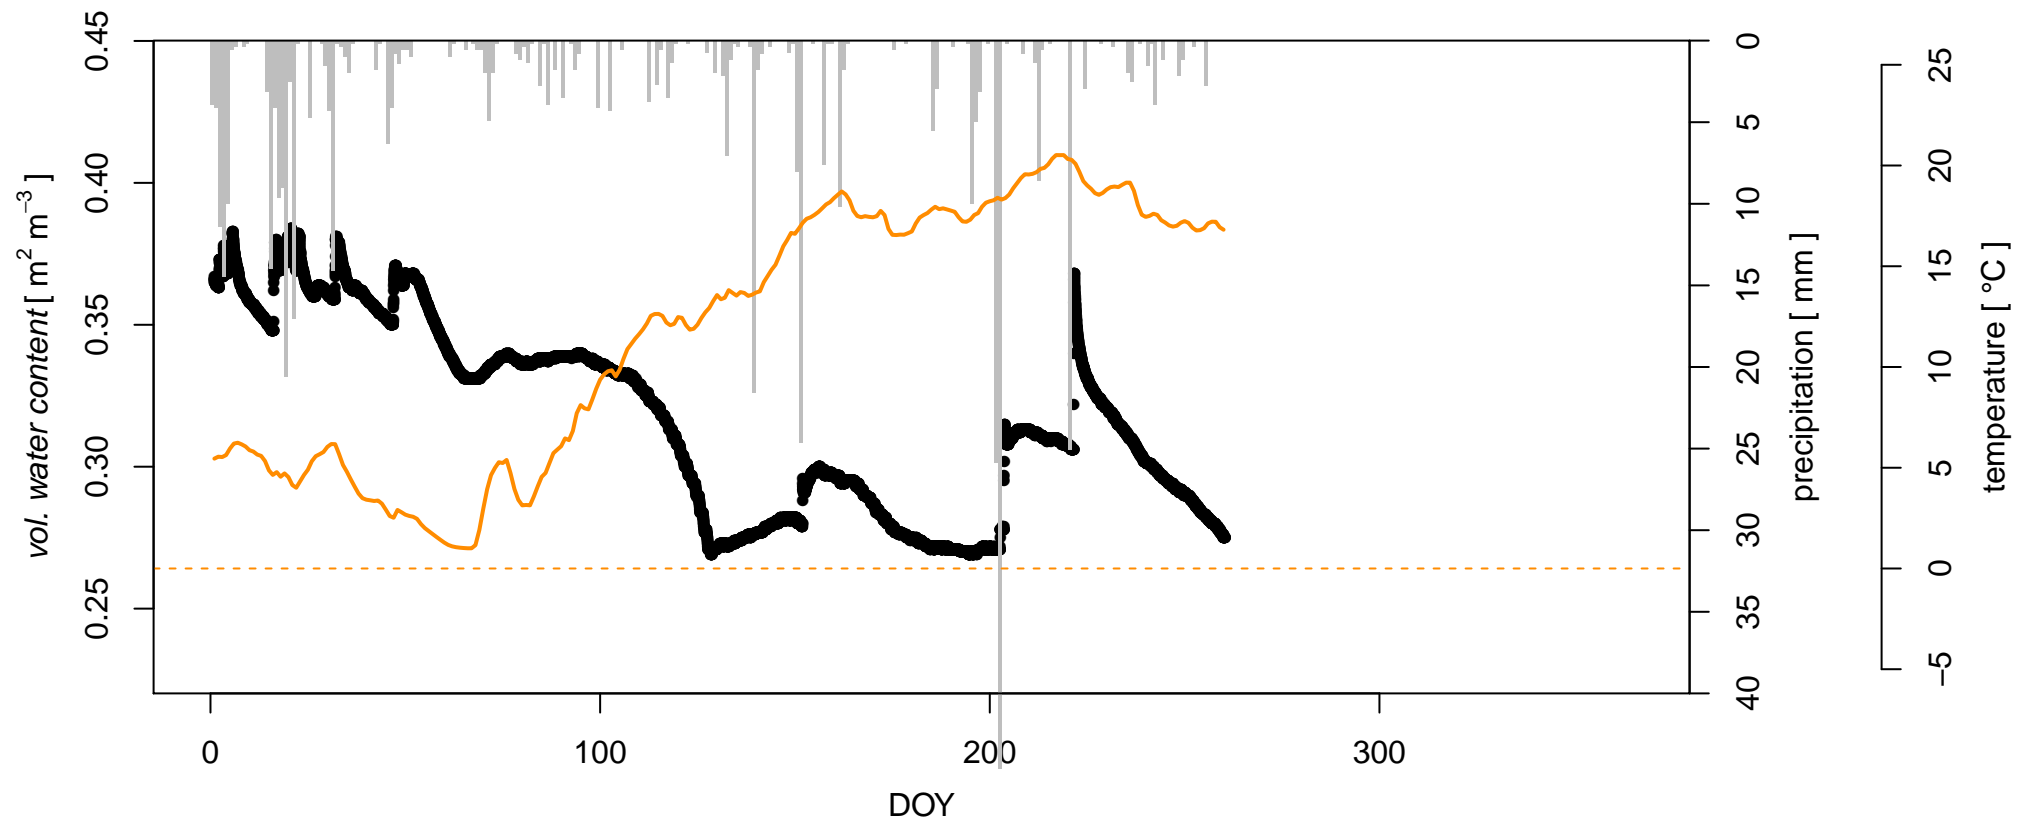

Supplement: Supplementary file 25 [file ec3vwc_45.pdf › ec3vwc_45.pdf]

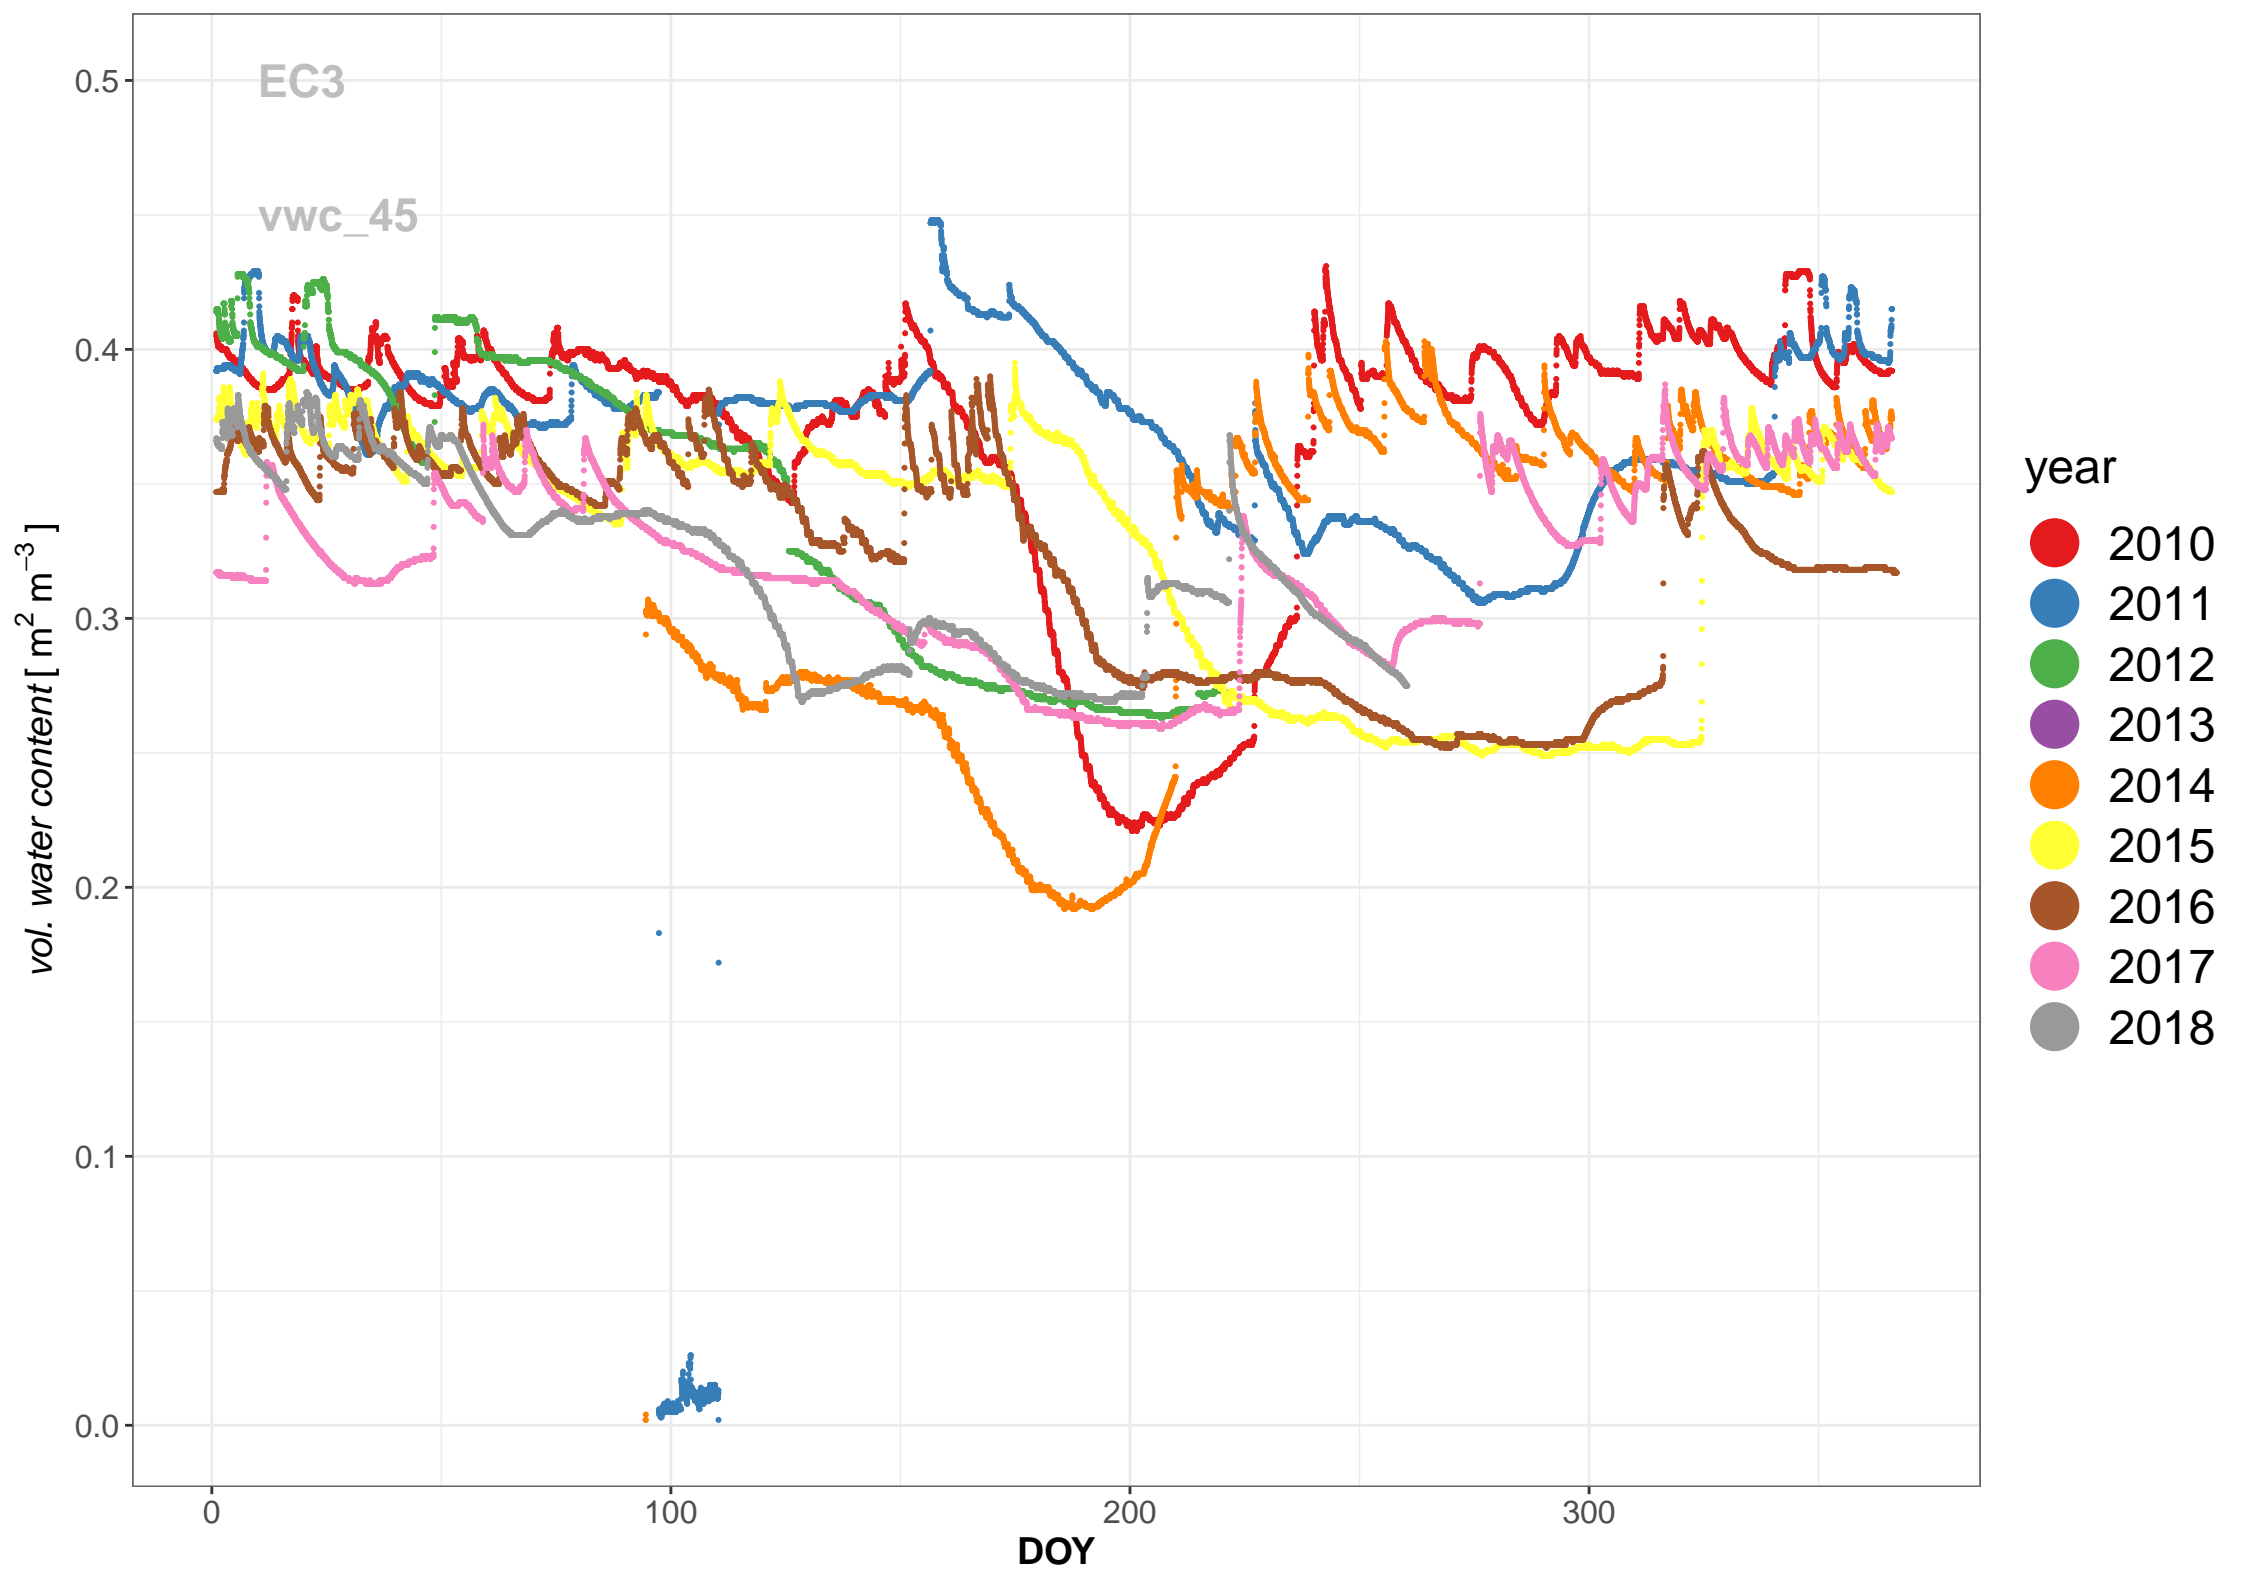

Supplement: Supplementary file 26 [file ec3vwc_45_DOY.pdf › ec3vwc_45_DOY.pdf]

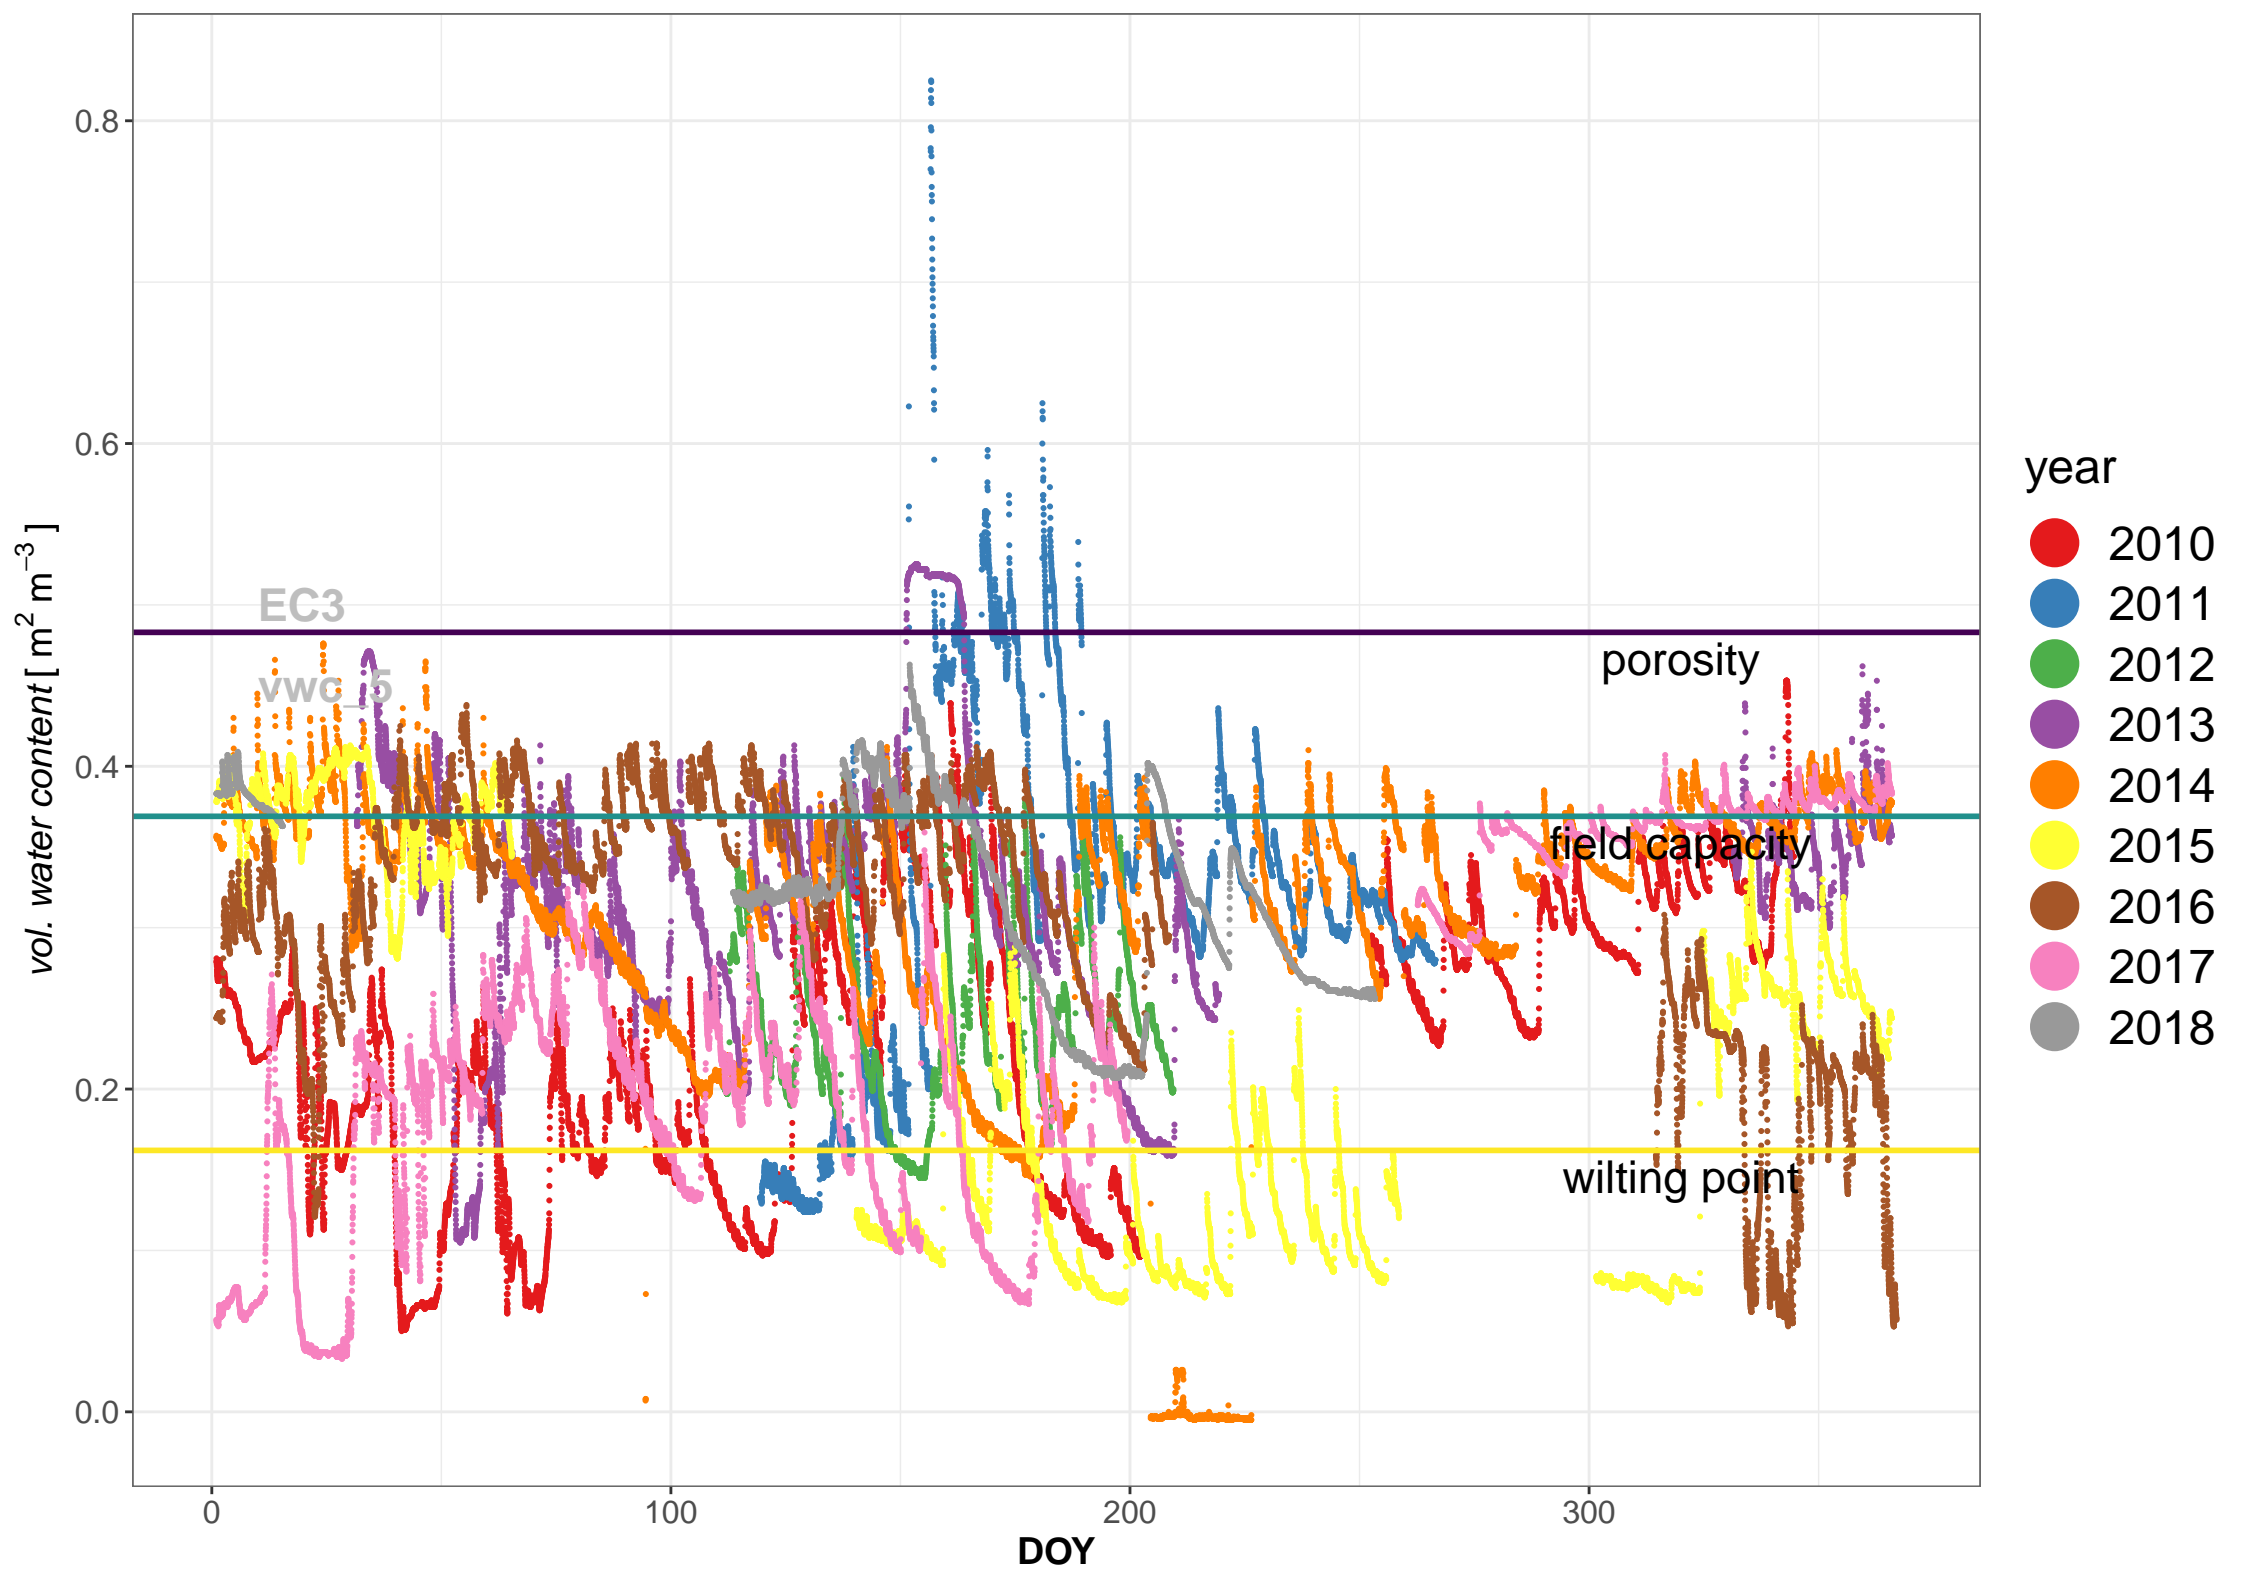

Supplement: Supplementary file 28 [file ec3vwc_5_DOY.pdf › ec3vwc_5_DOY.pdf]

ec3 2010  
depth 75 cm

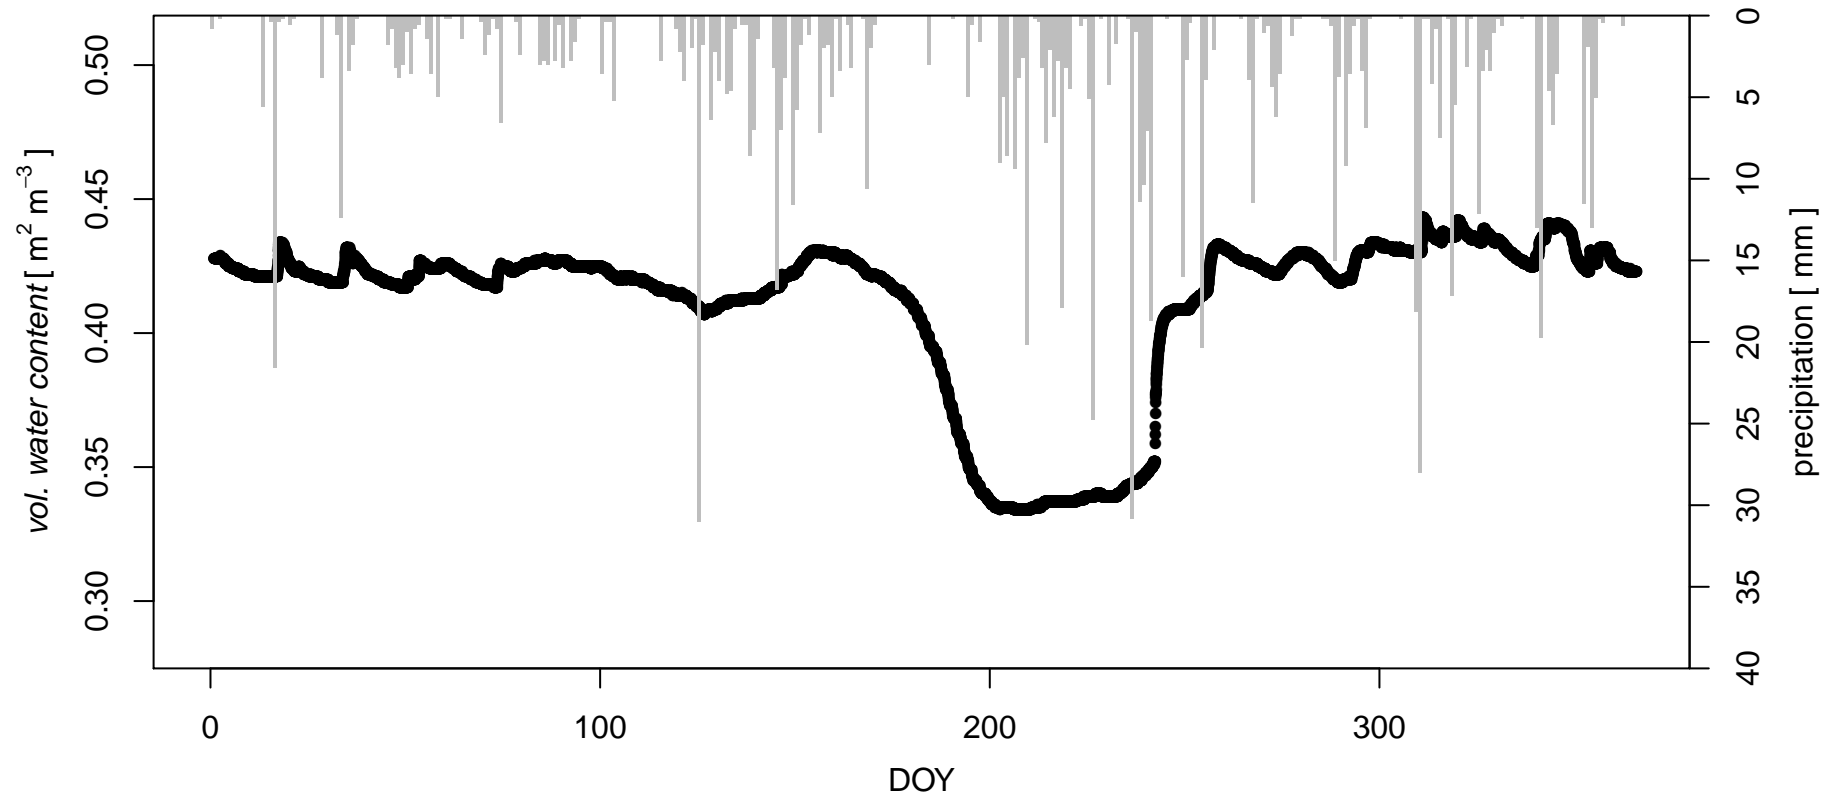

ec3 2011  
depth 75 cm

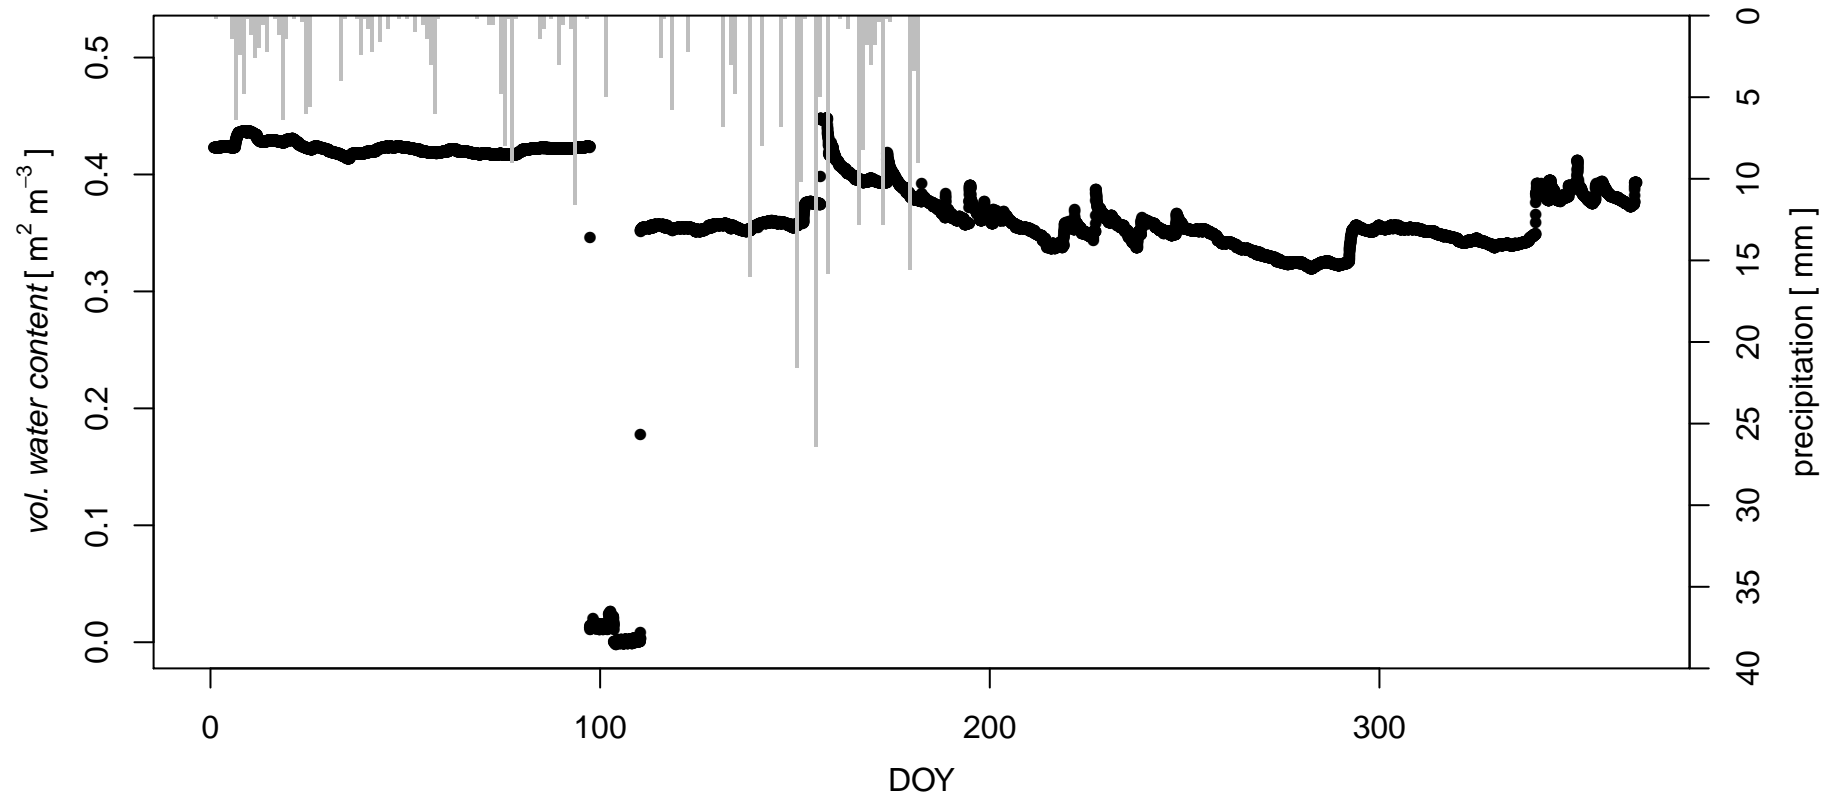

ec3 2012  
depth 75 cm

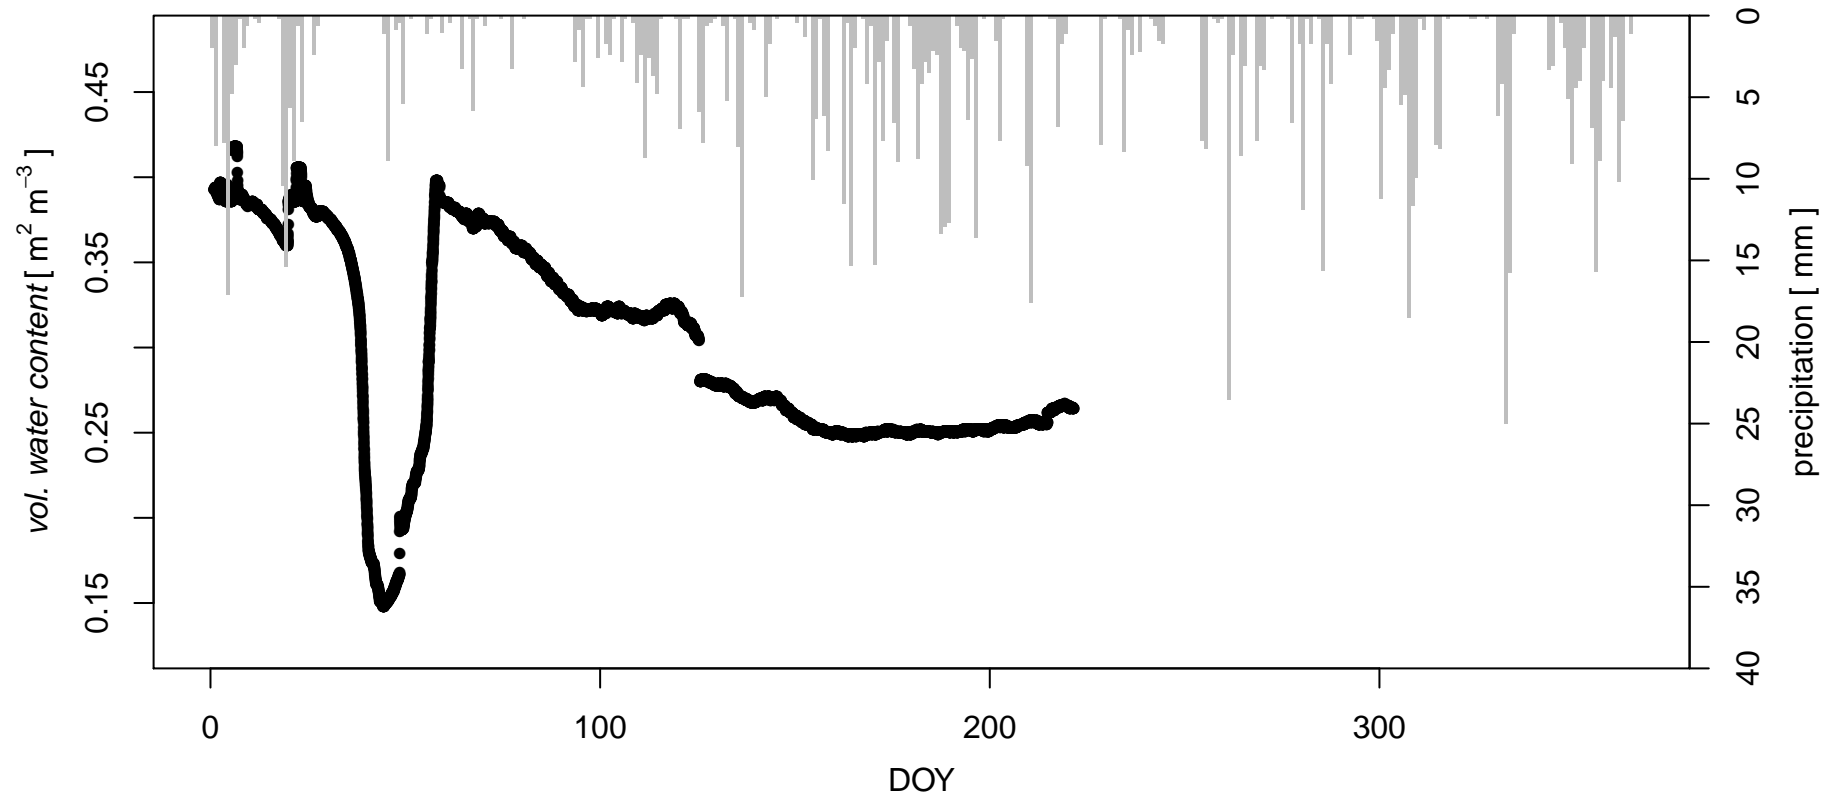

ec3 2014  
depth 75 cm

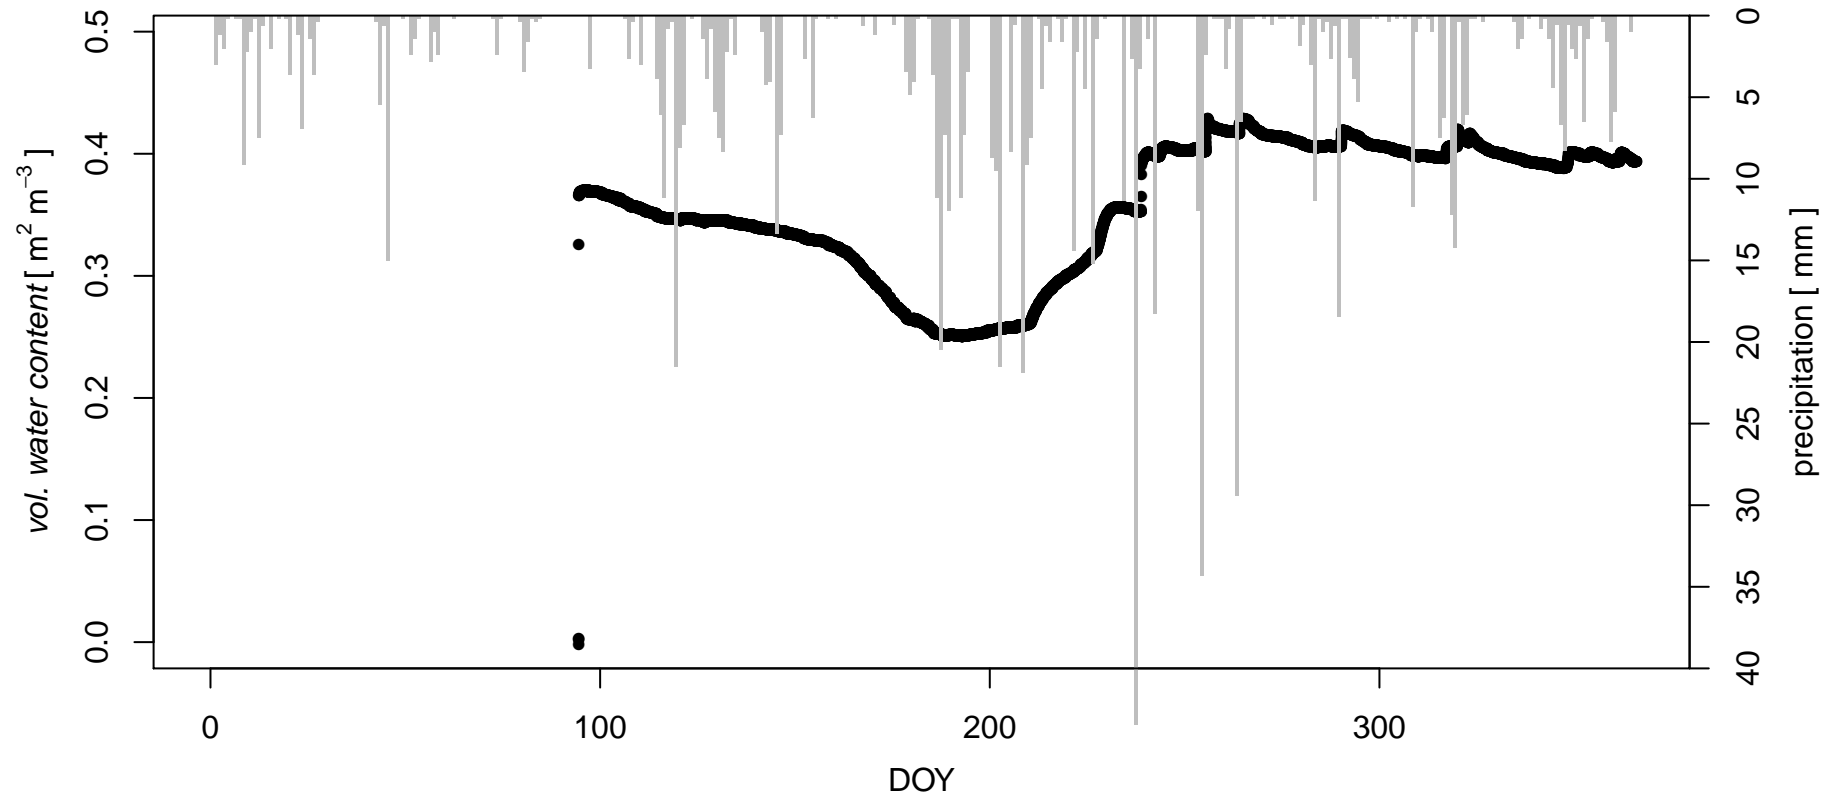

ec3 2015  
depth 75 cm

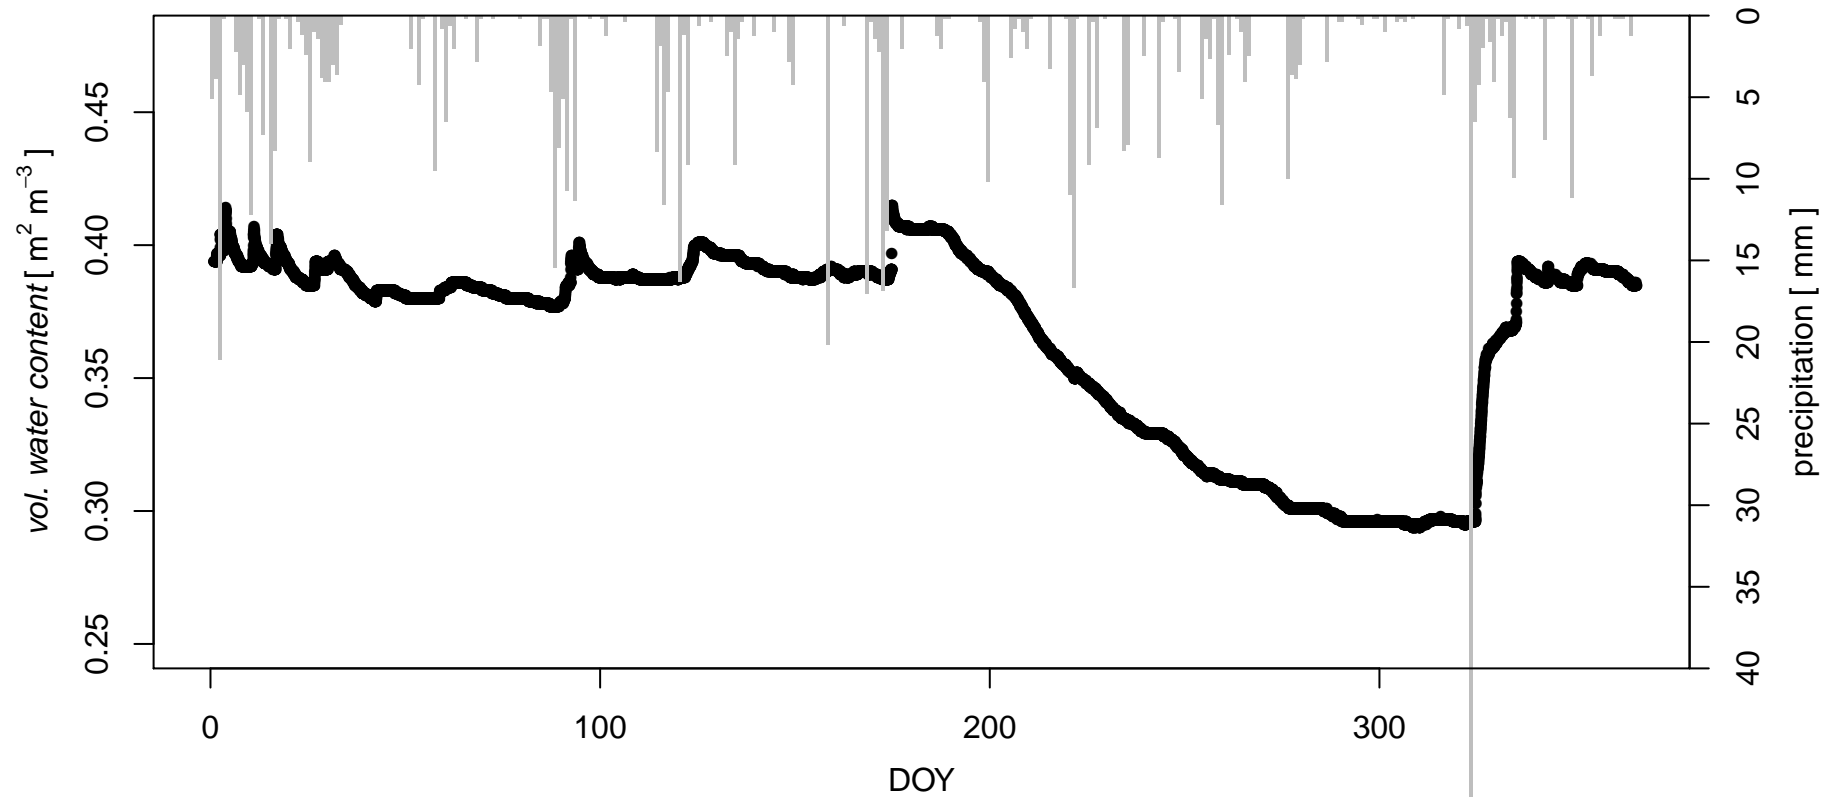

ec3 2016  
depth 75 cm

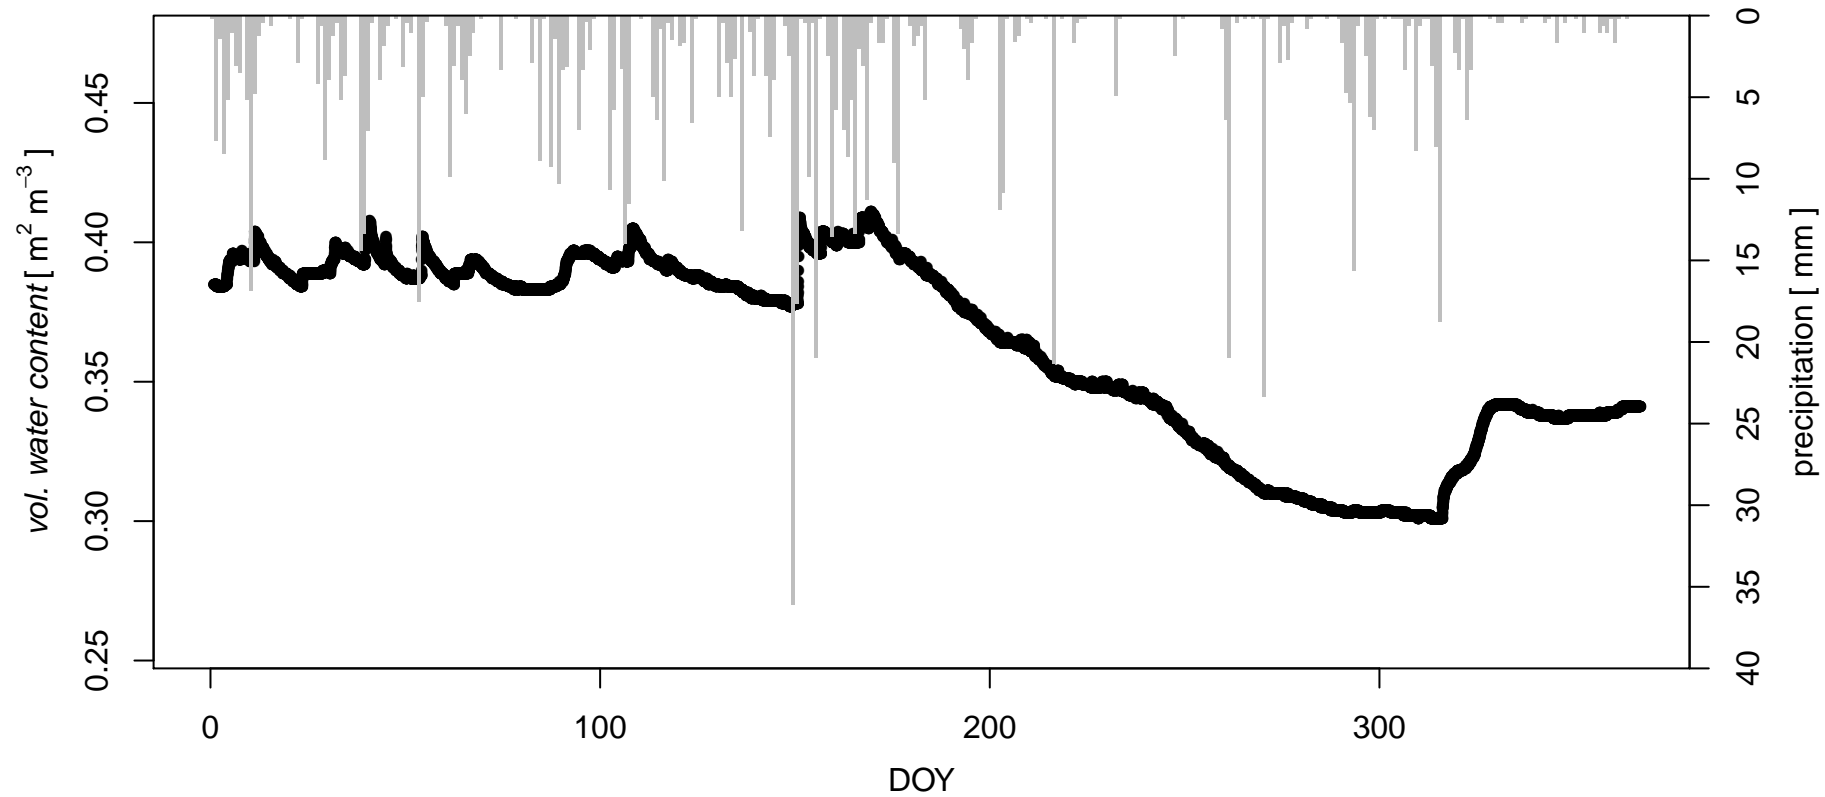

ec3 2017  
depth 75 cm

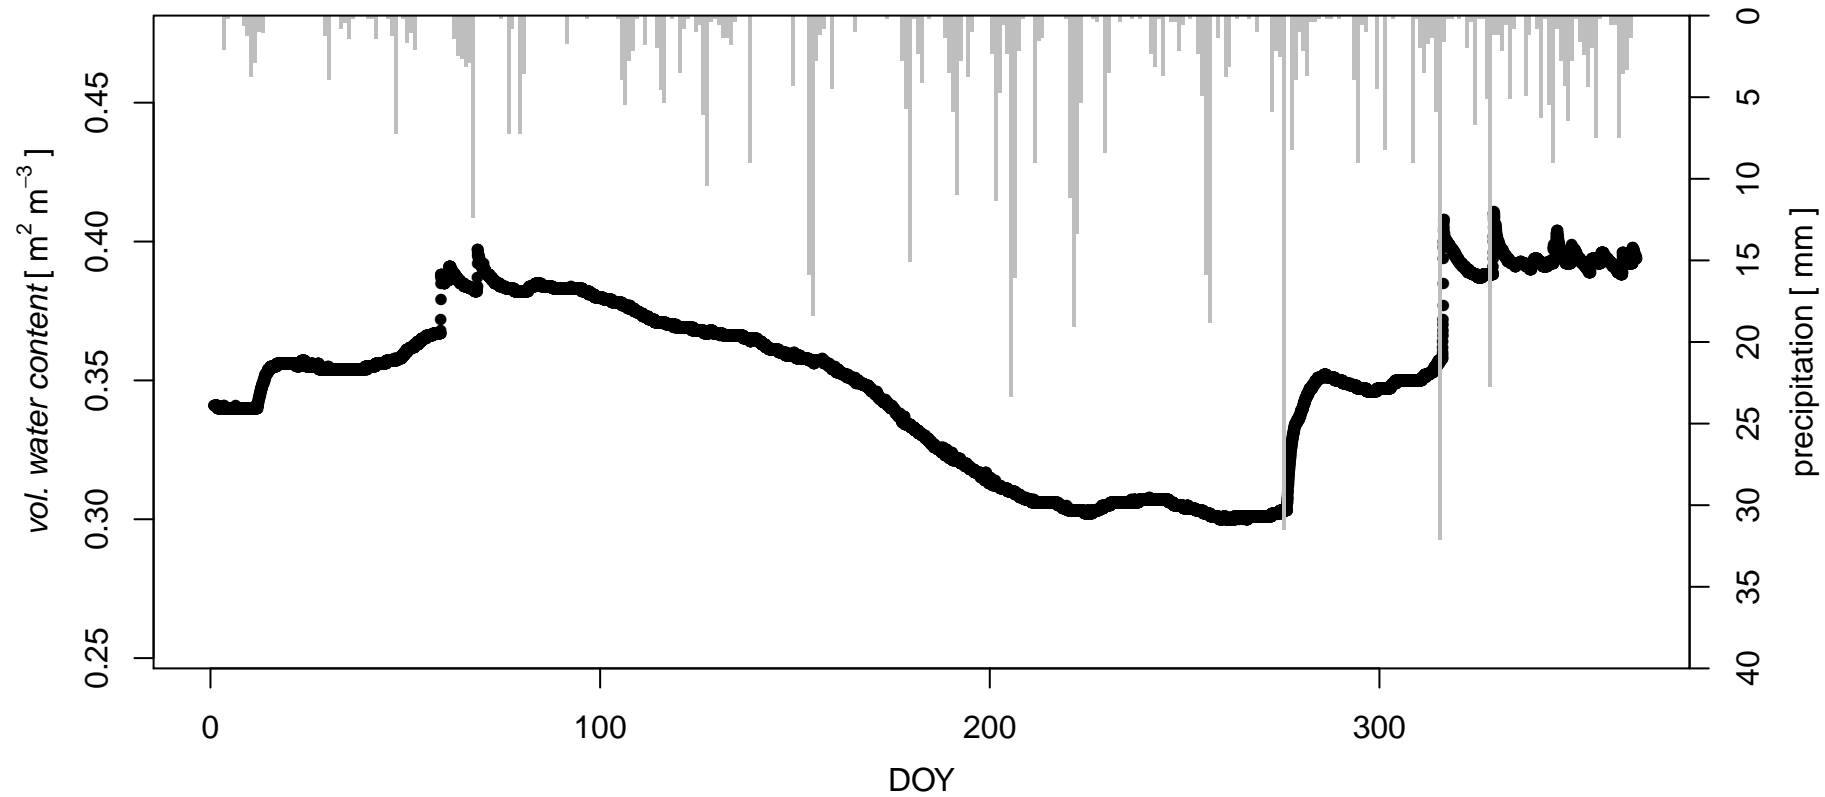

ec3 2018  
depth 75 cm

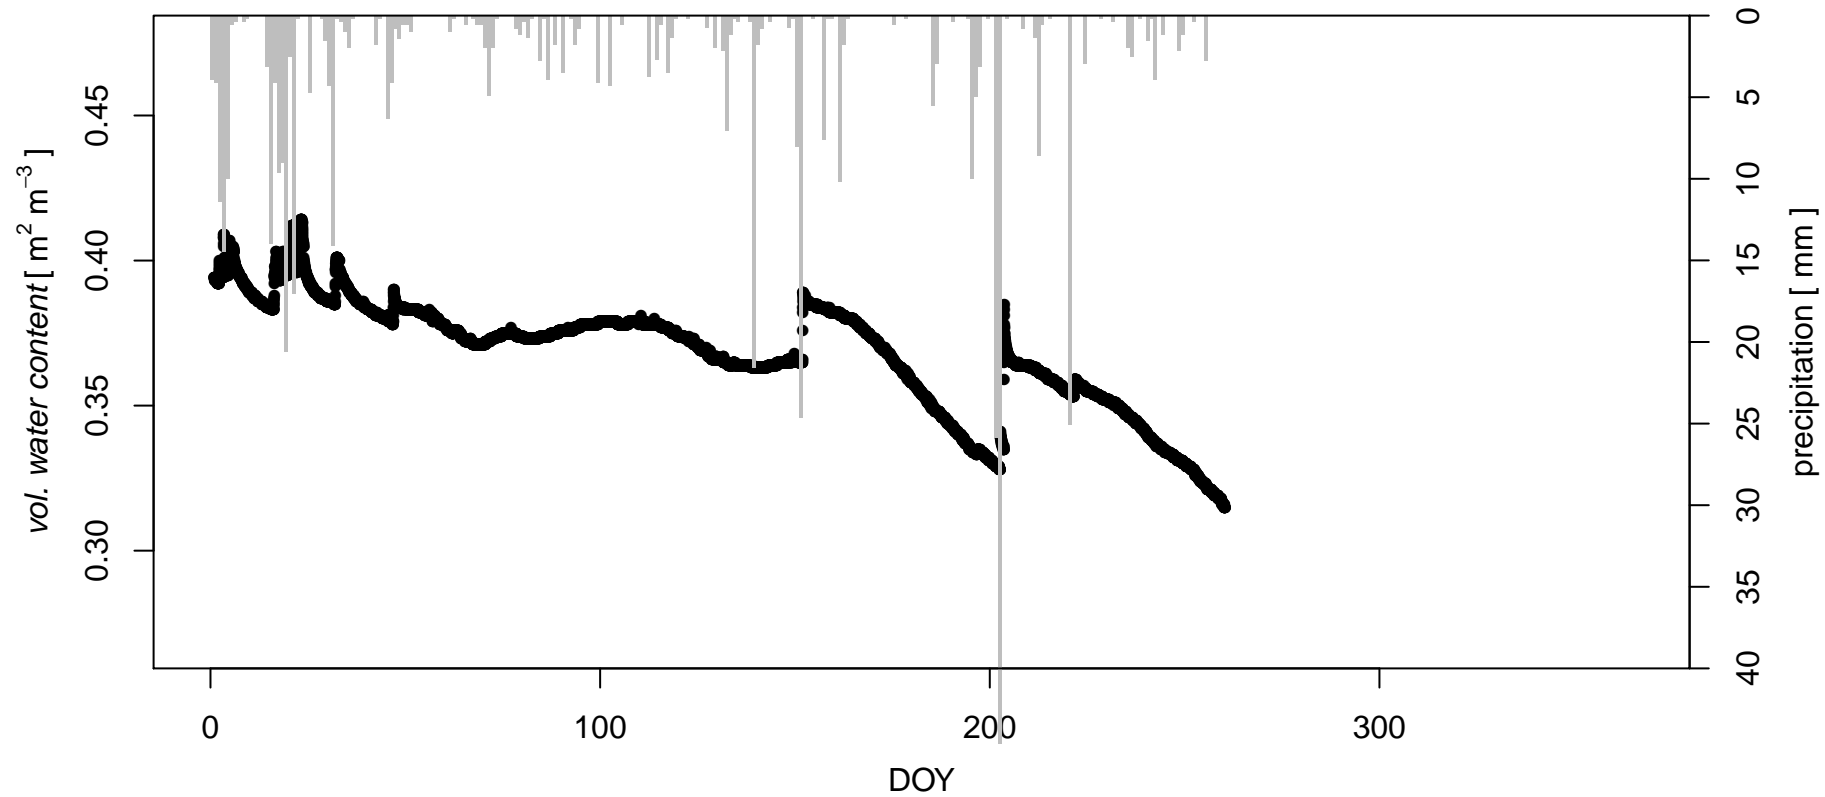

Supplement: Supplementary file 29 [file ec3vwc_75.pdf › ec3vwc_75.pdf]

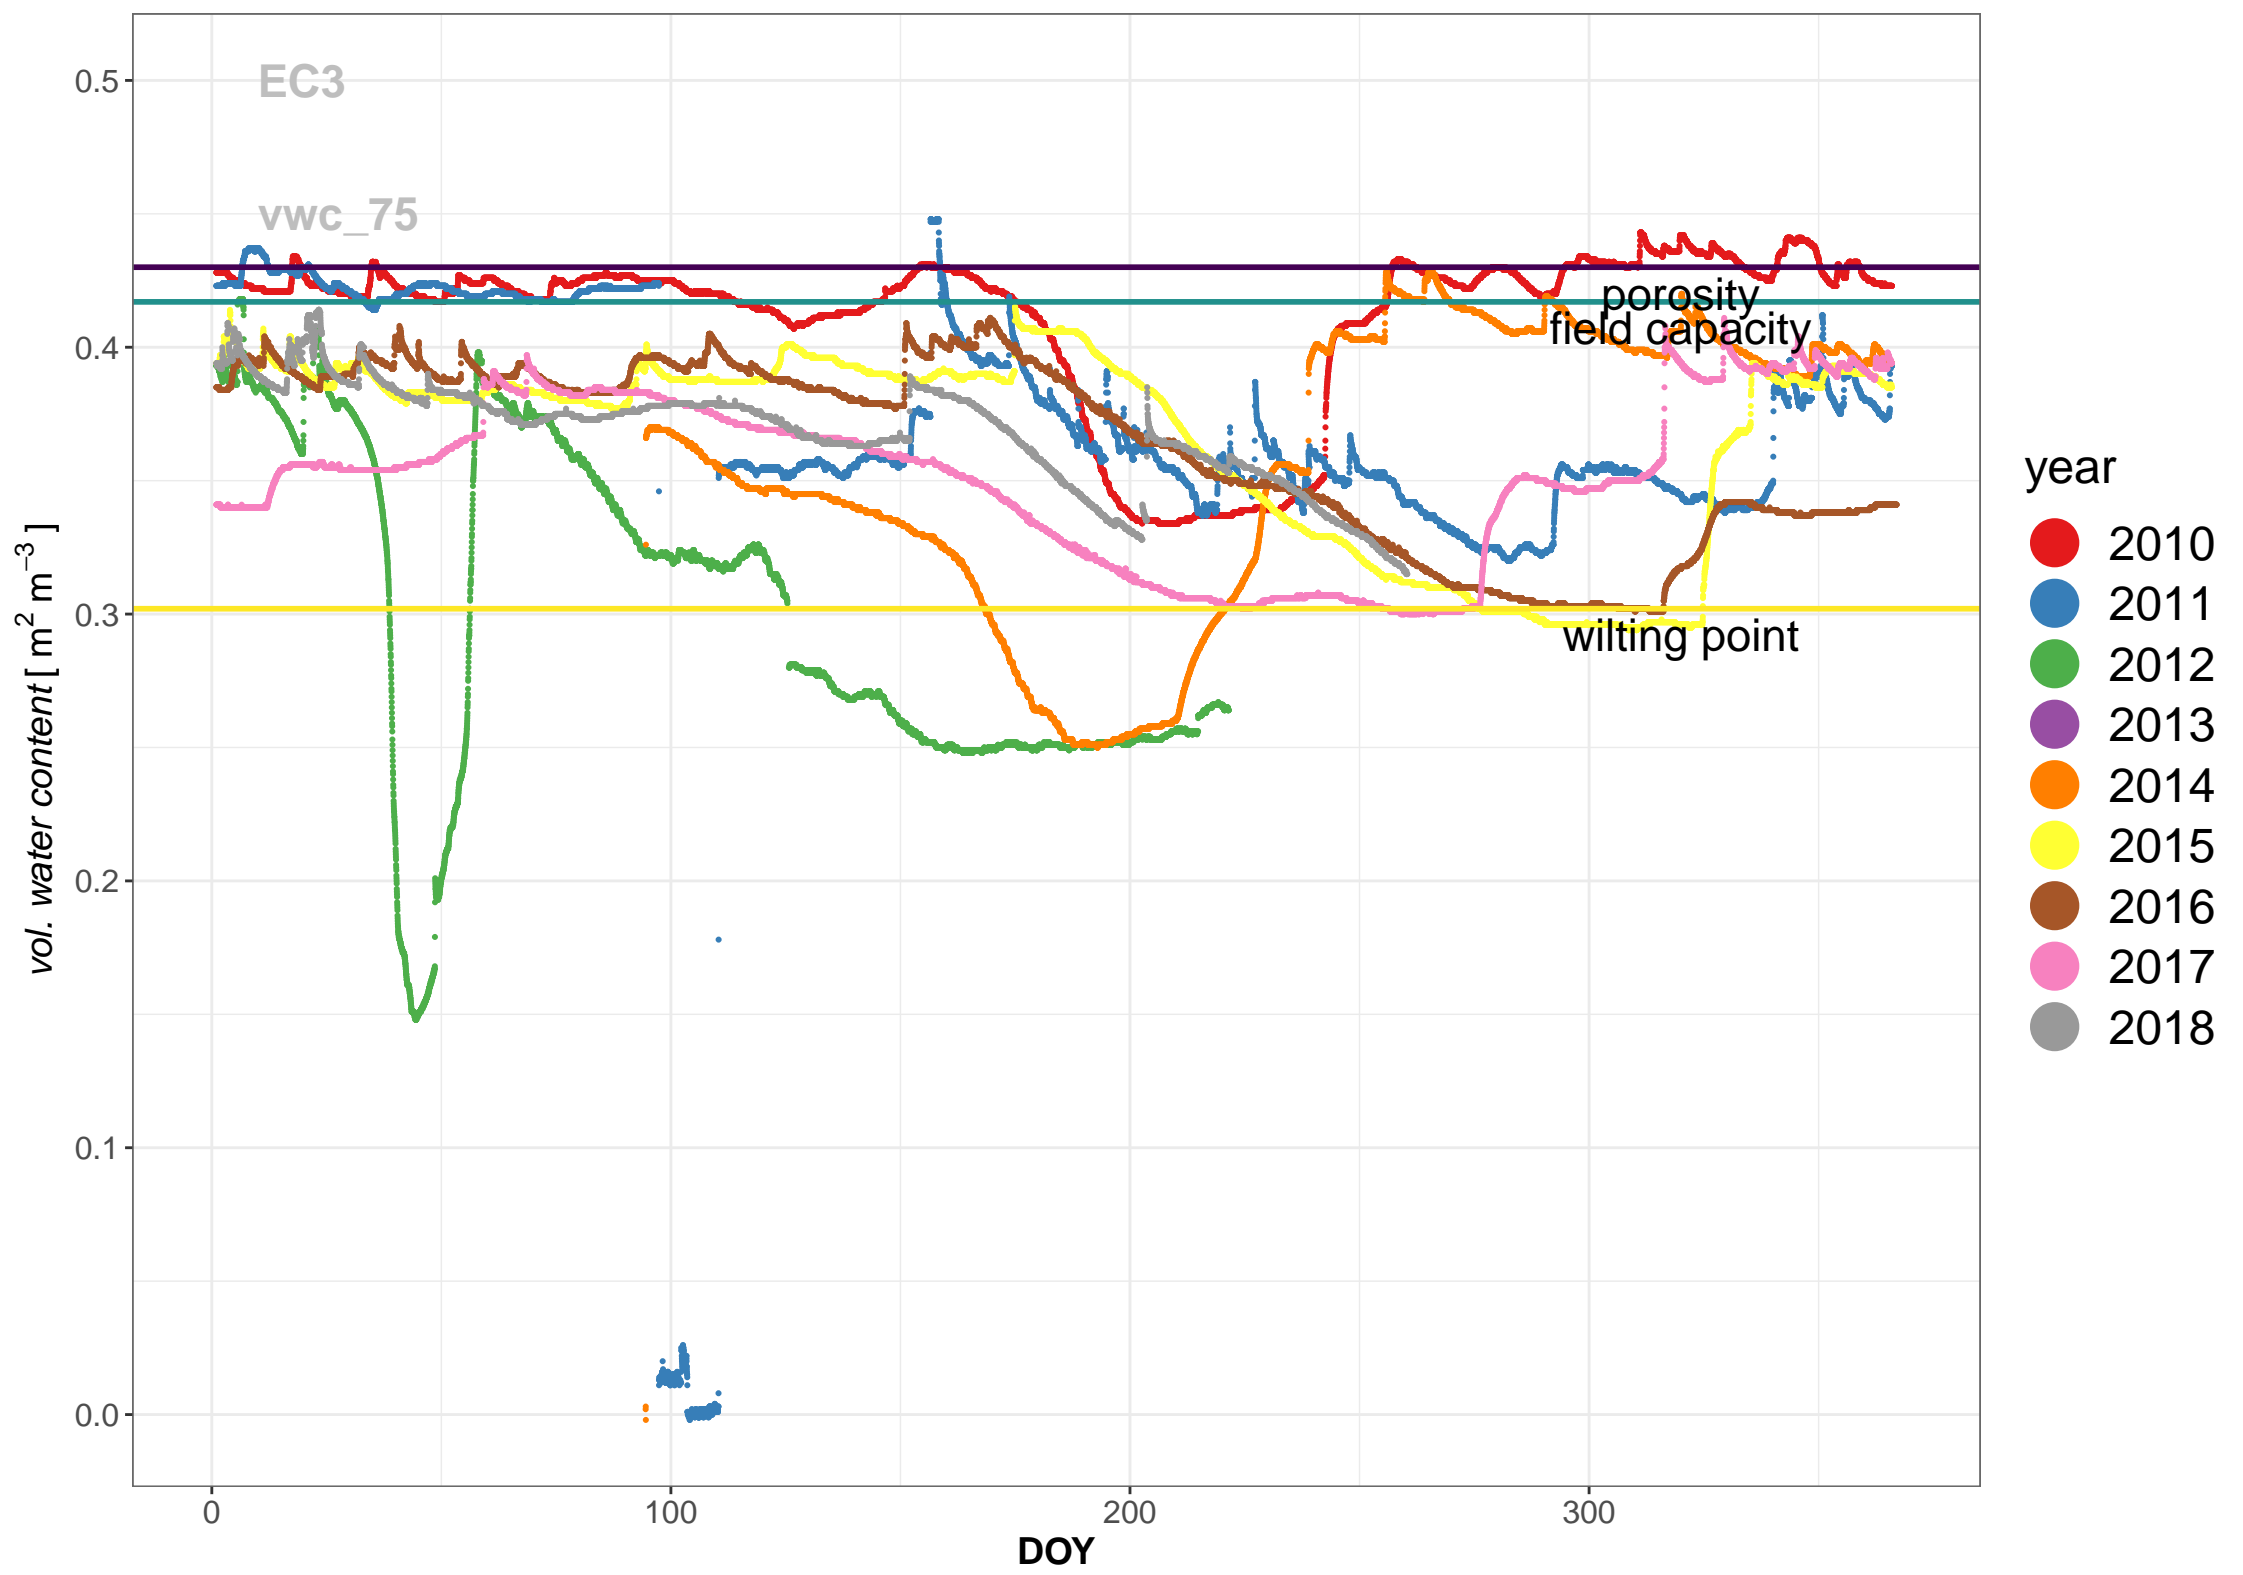

Supplement: Supplementary file 30 [file ec3vwc_75_DOY.pdf › ec3vwc_75_DOY.pdf]

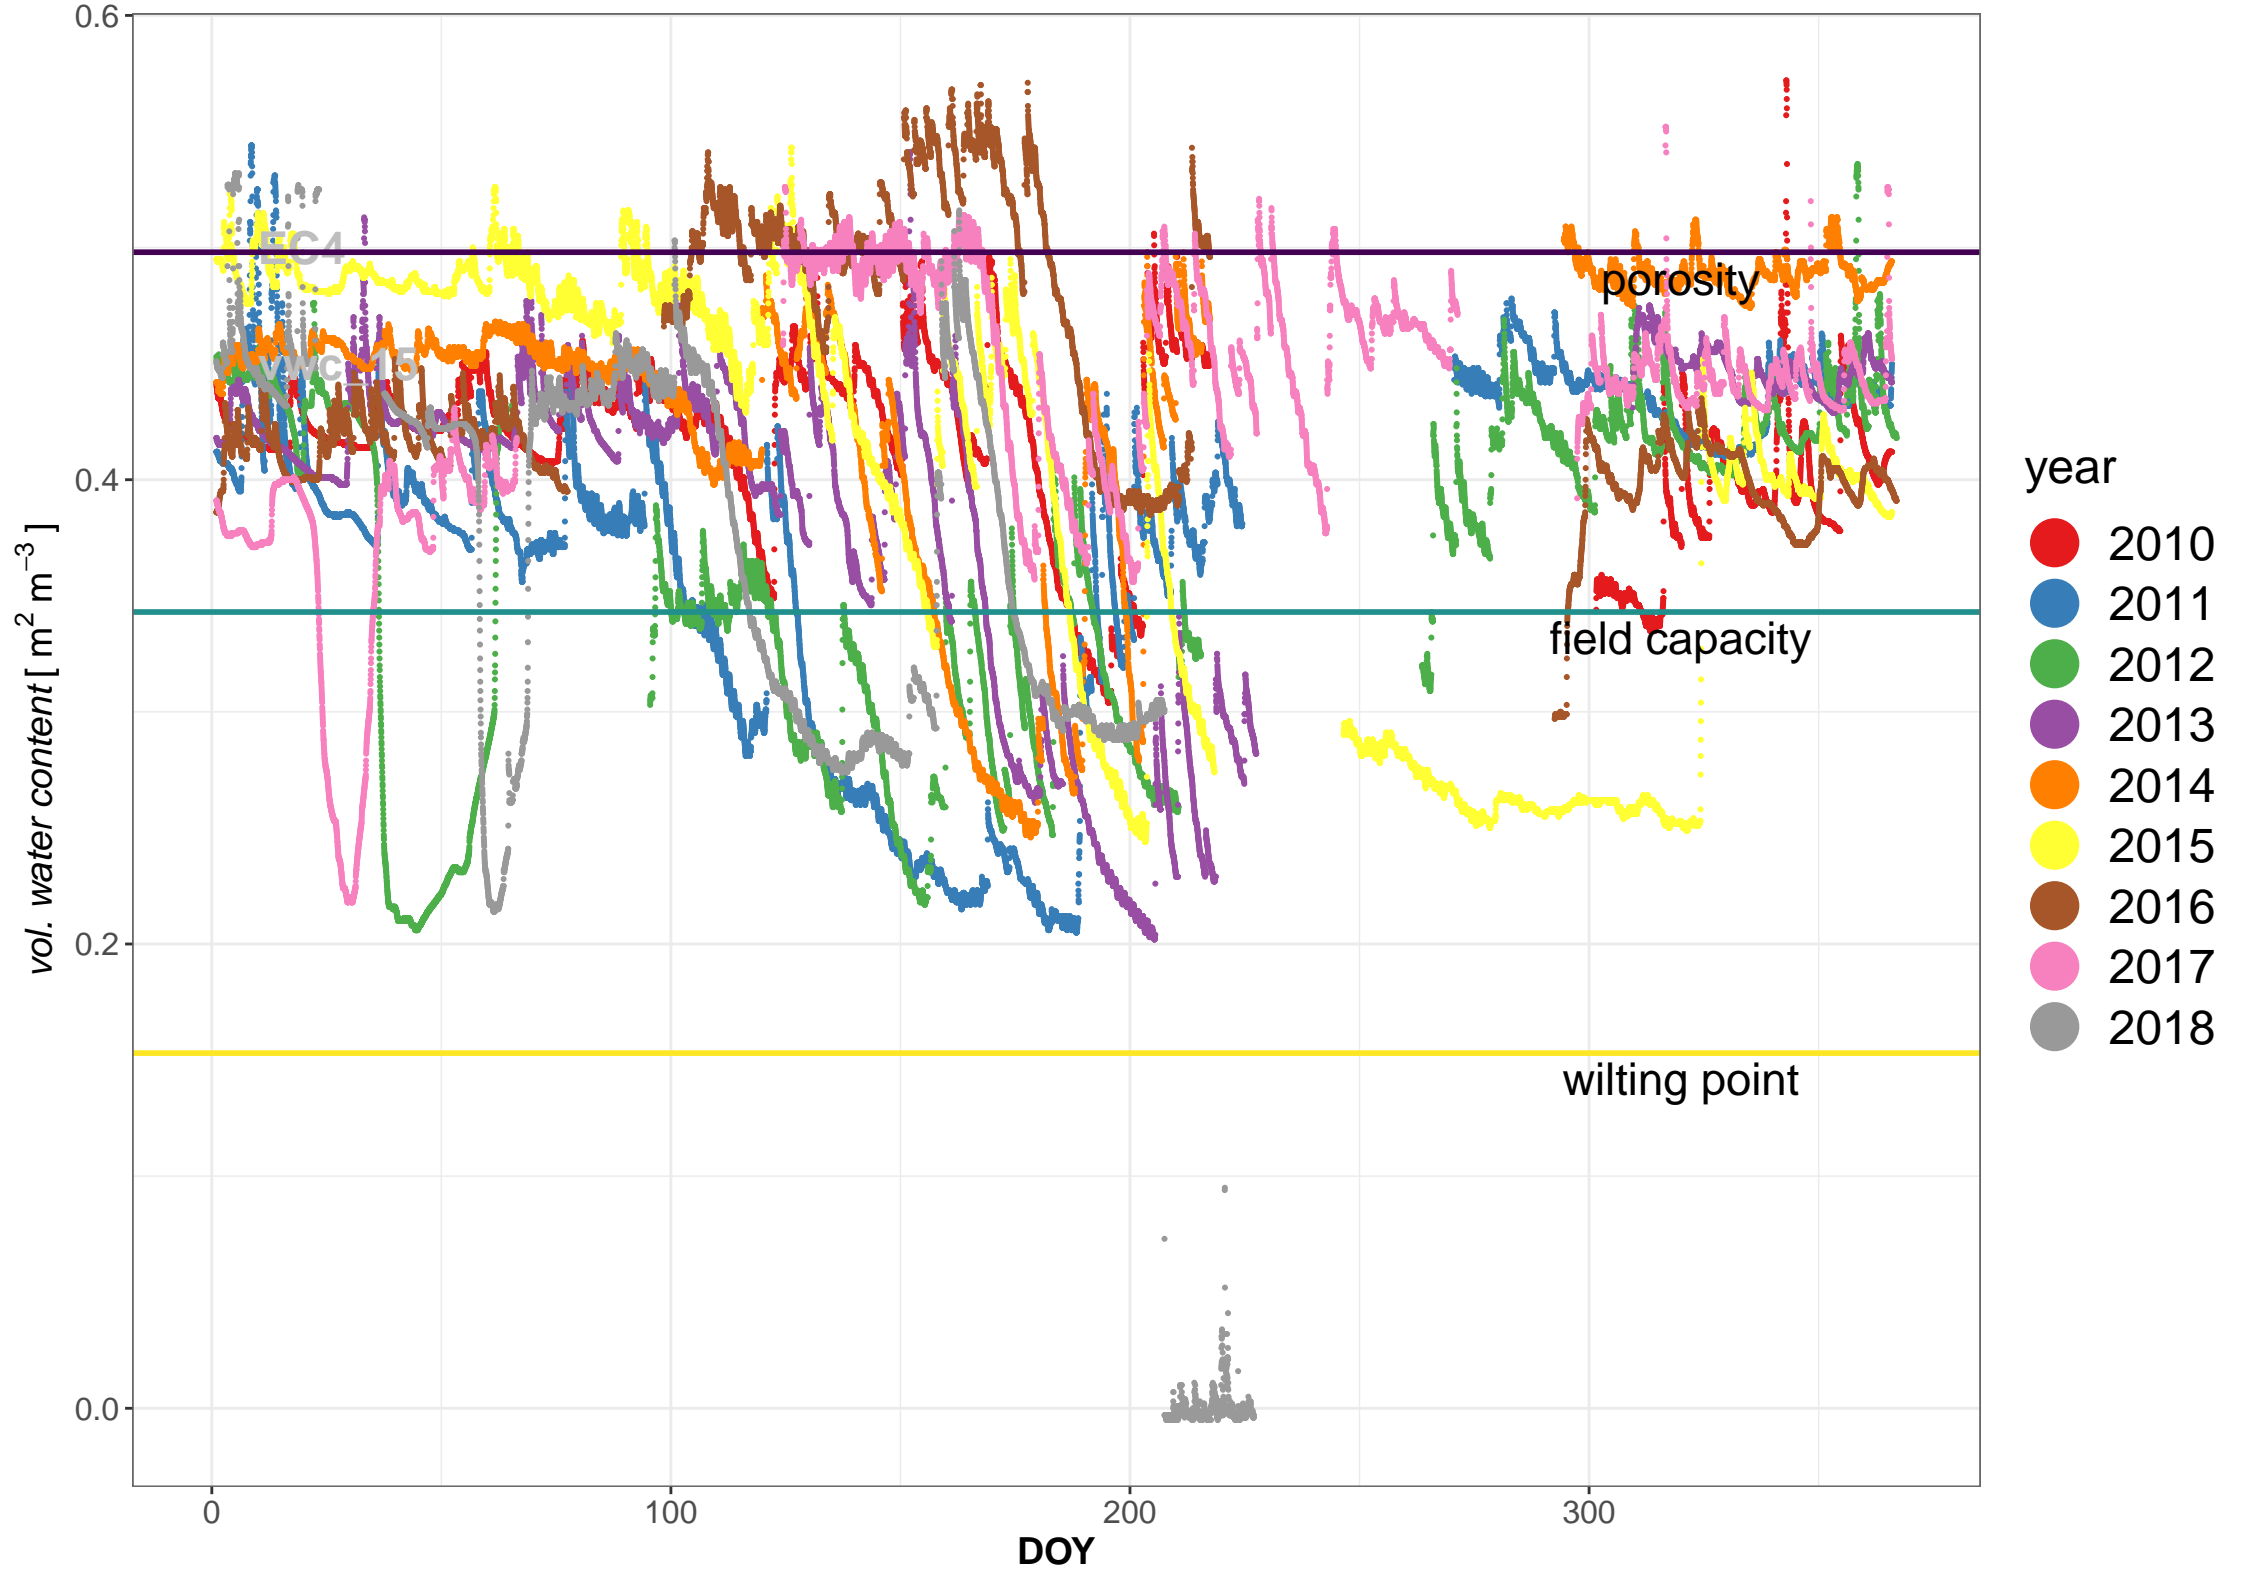

Supplement: Supplementary file 32 [file ec4vwc_15_DOY.pdf › ec4vwc_15_DOY.pdf]

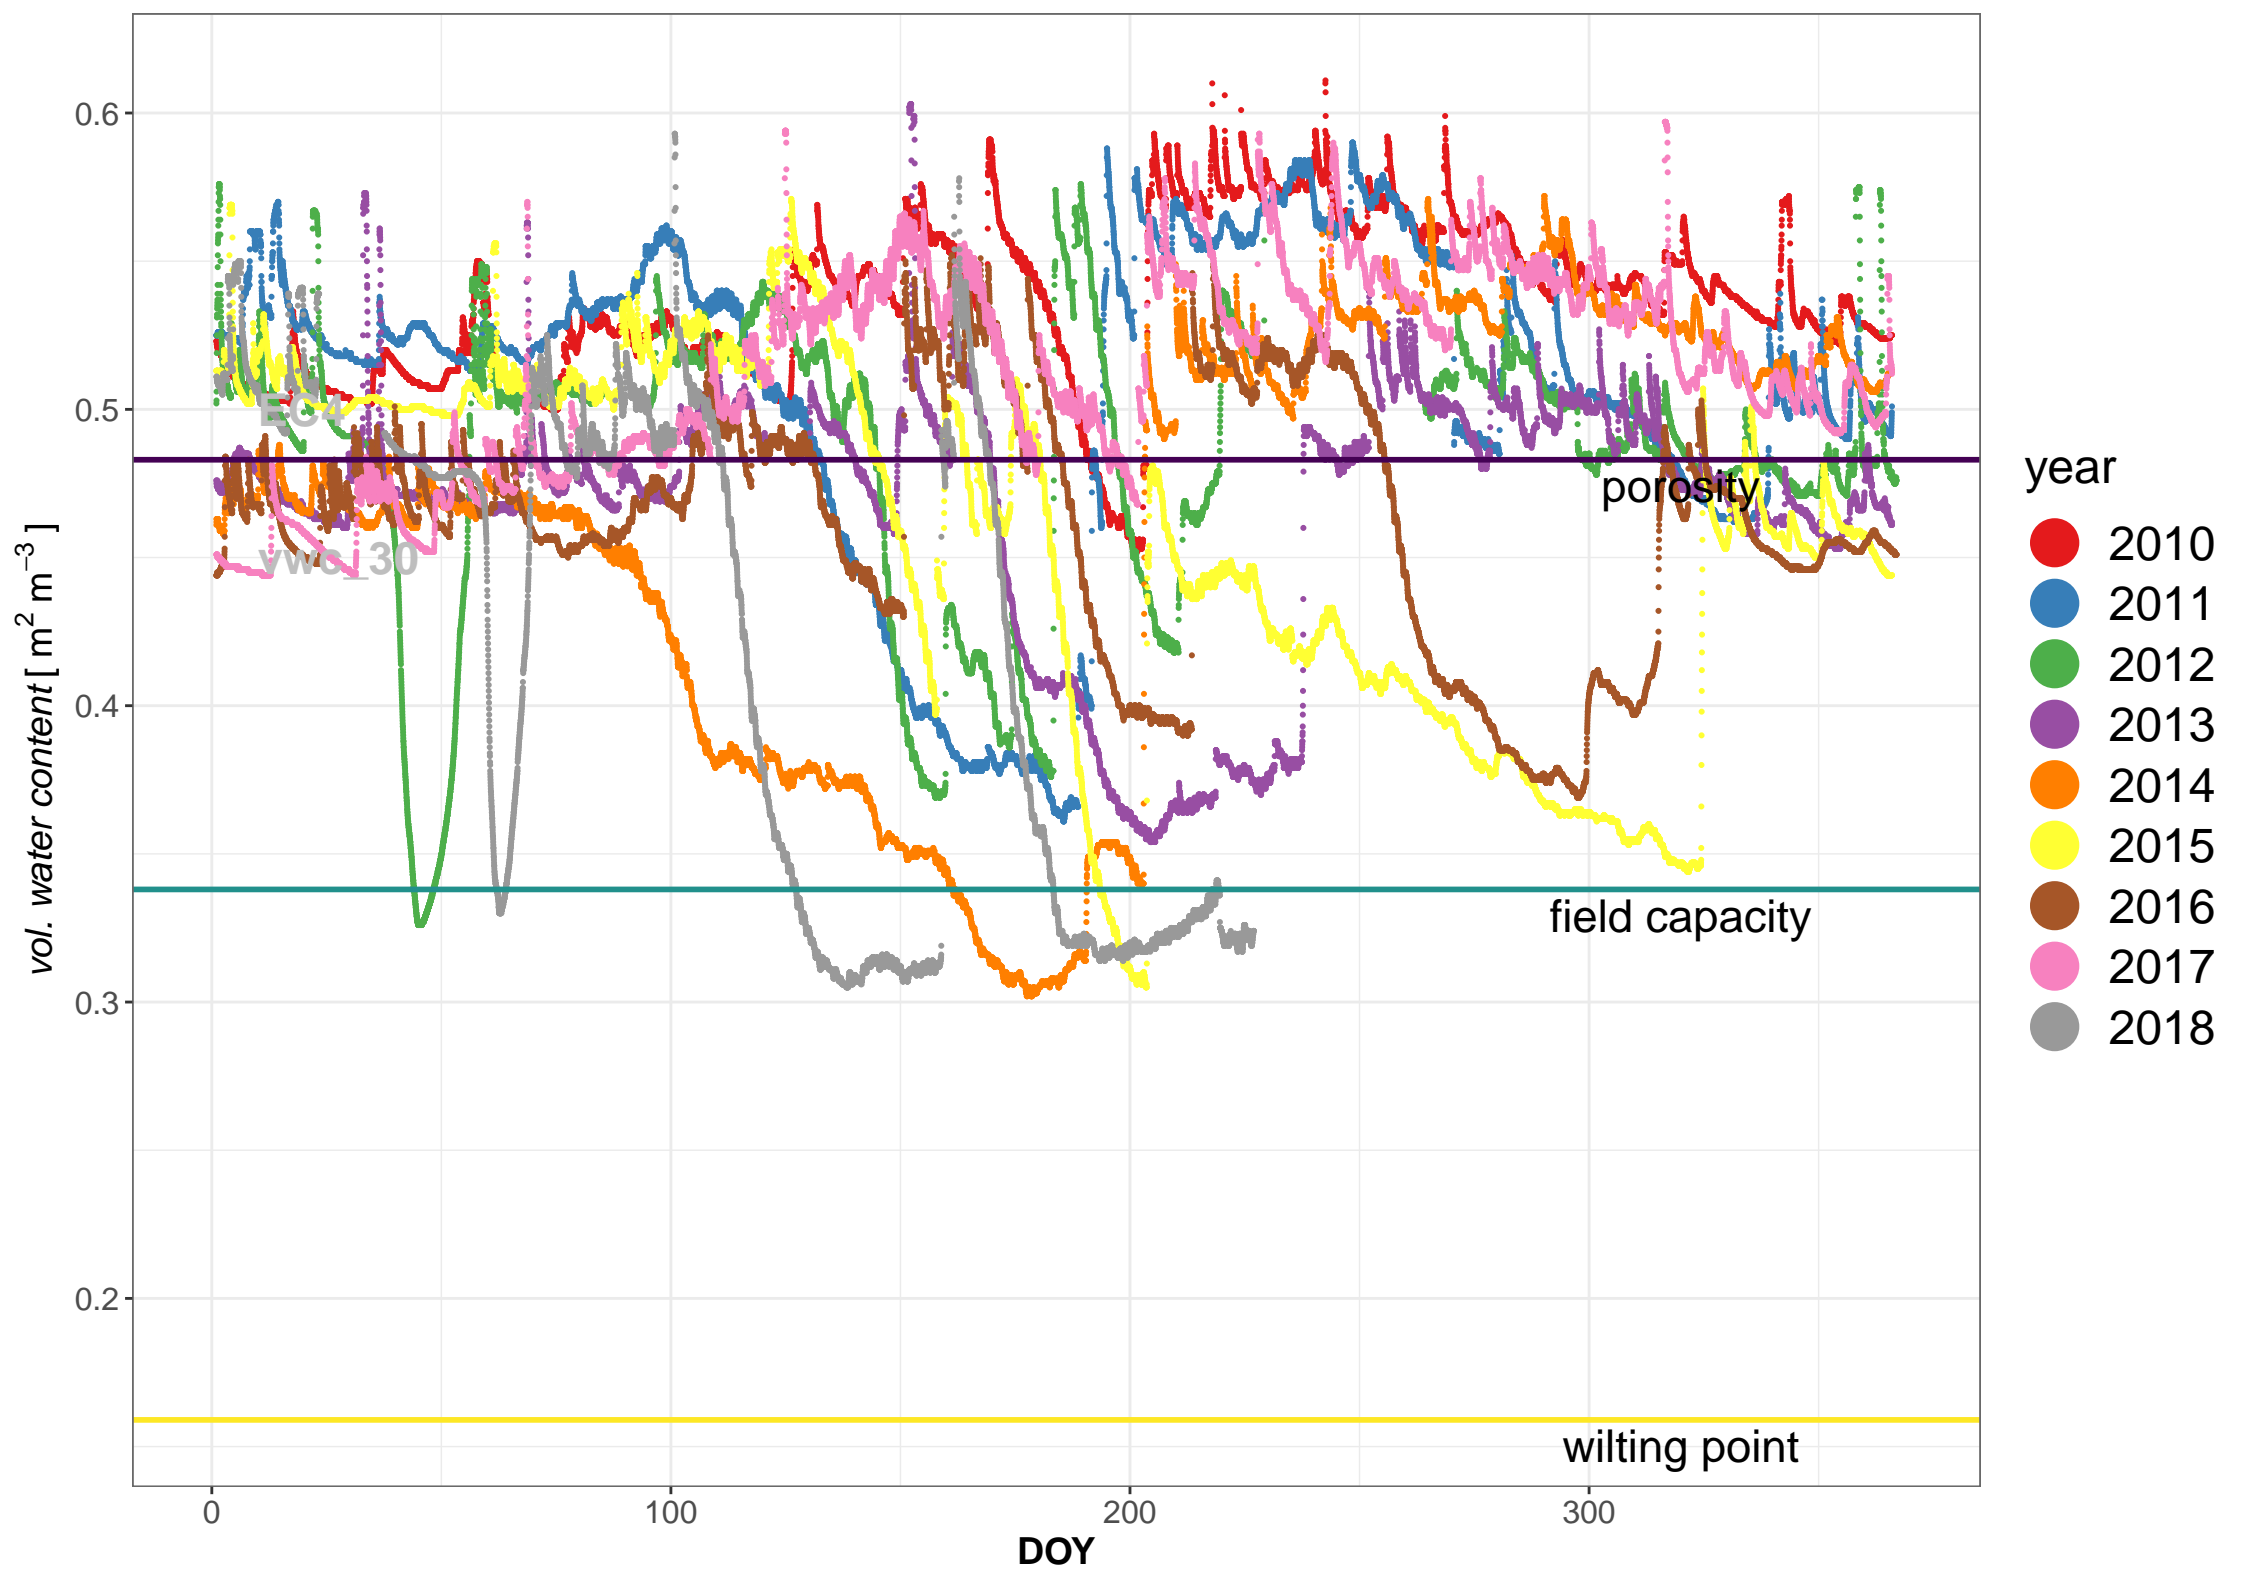

Supplement: Supplementary file 34 [file ec4vwc_30_DOY.pdf › ec4vwc_30_DOY.pdf]

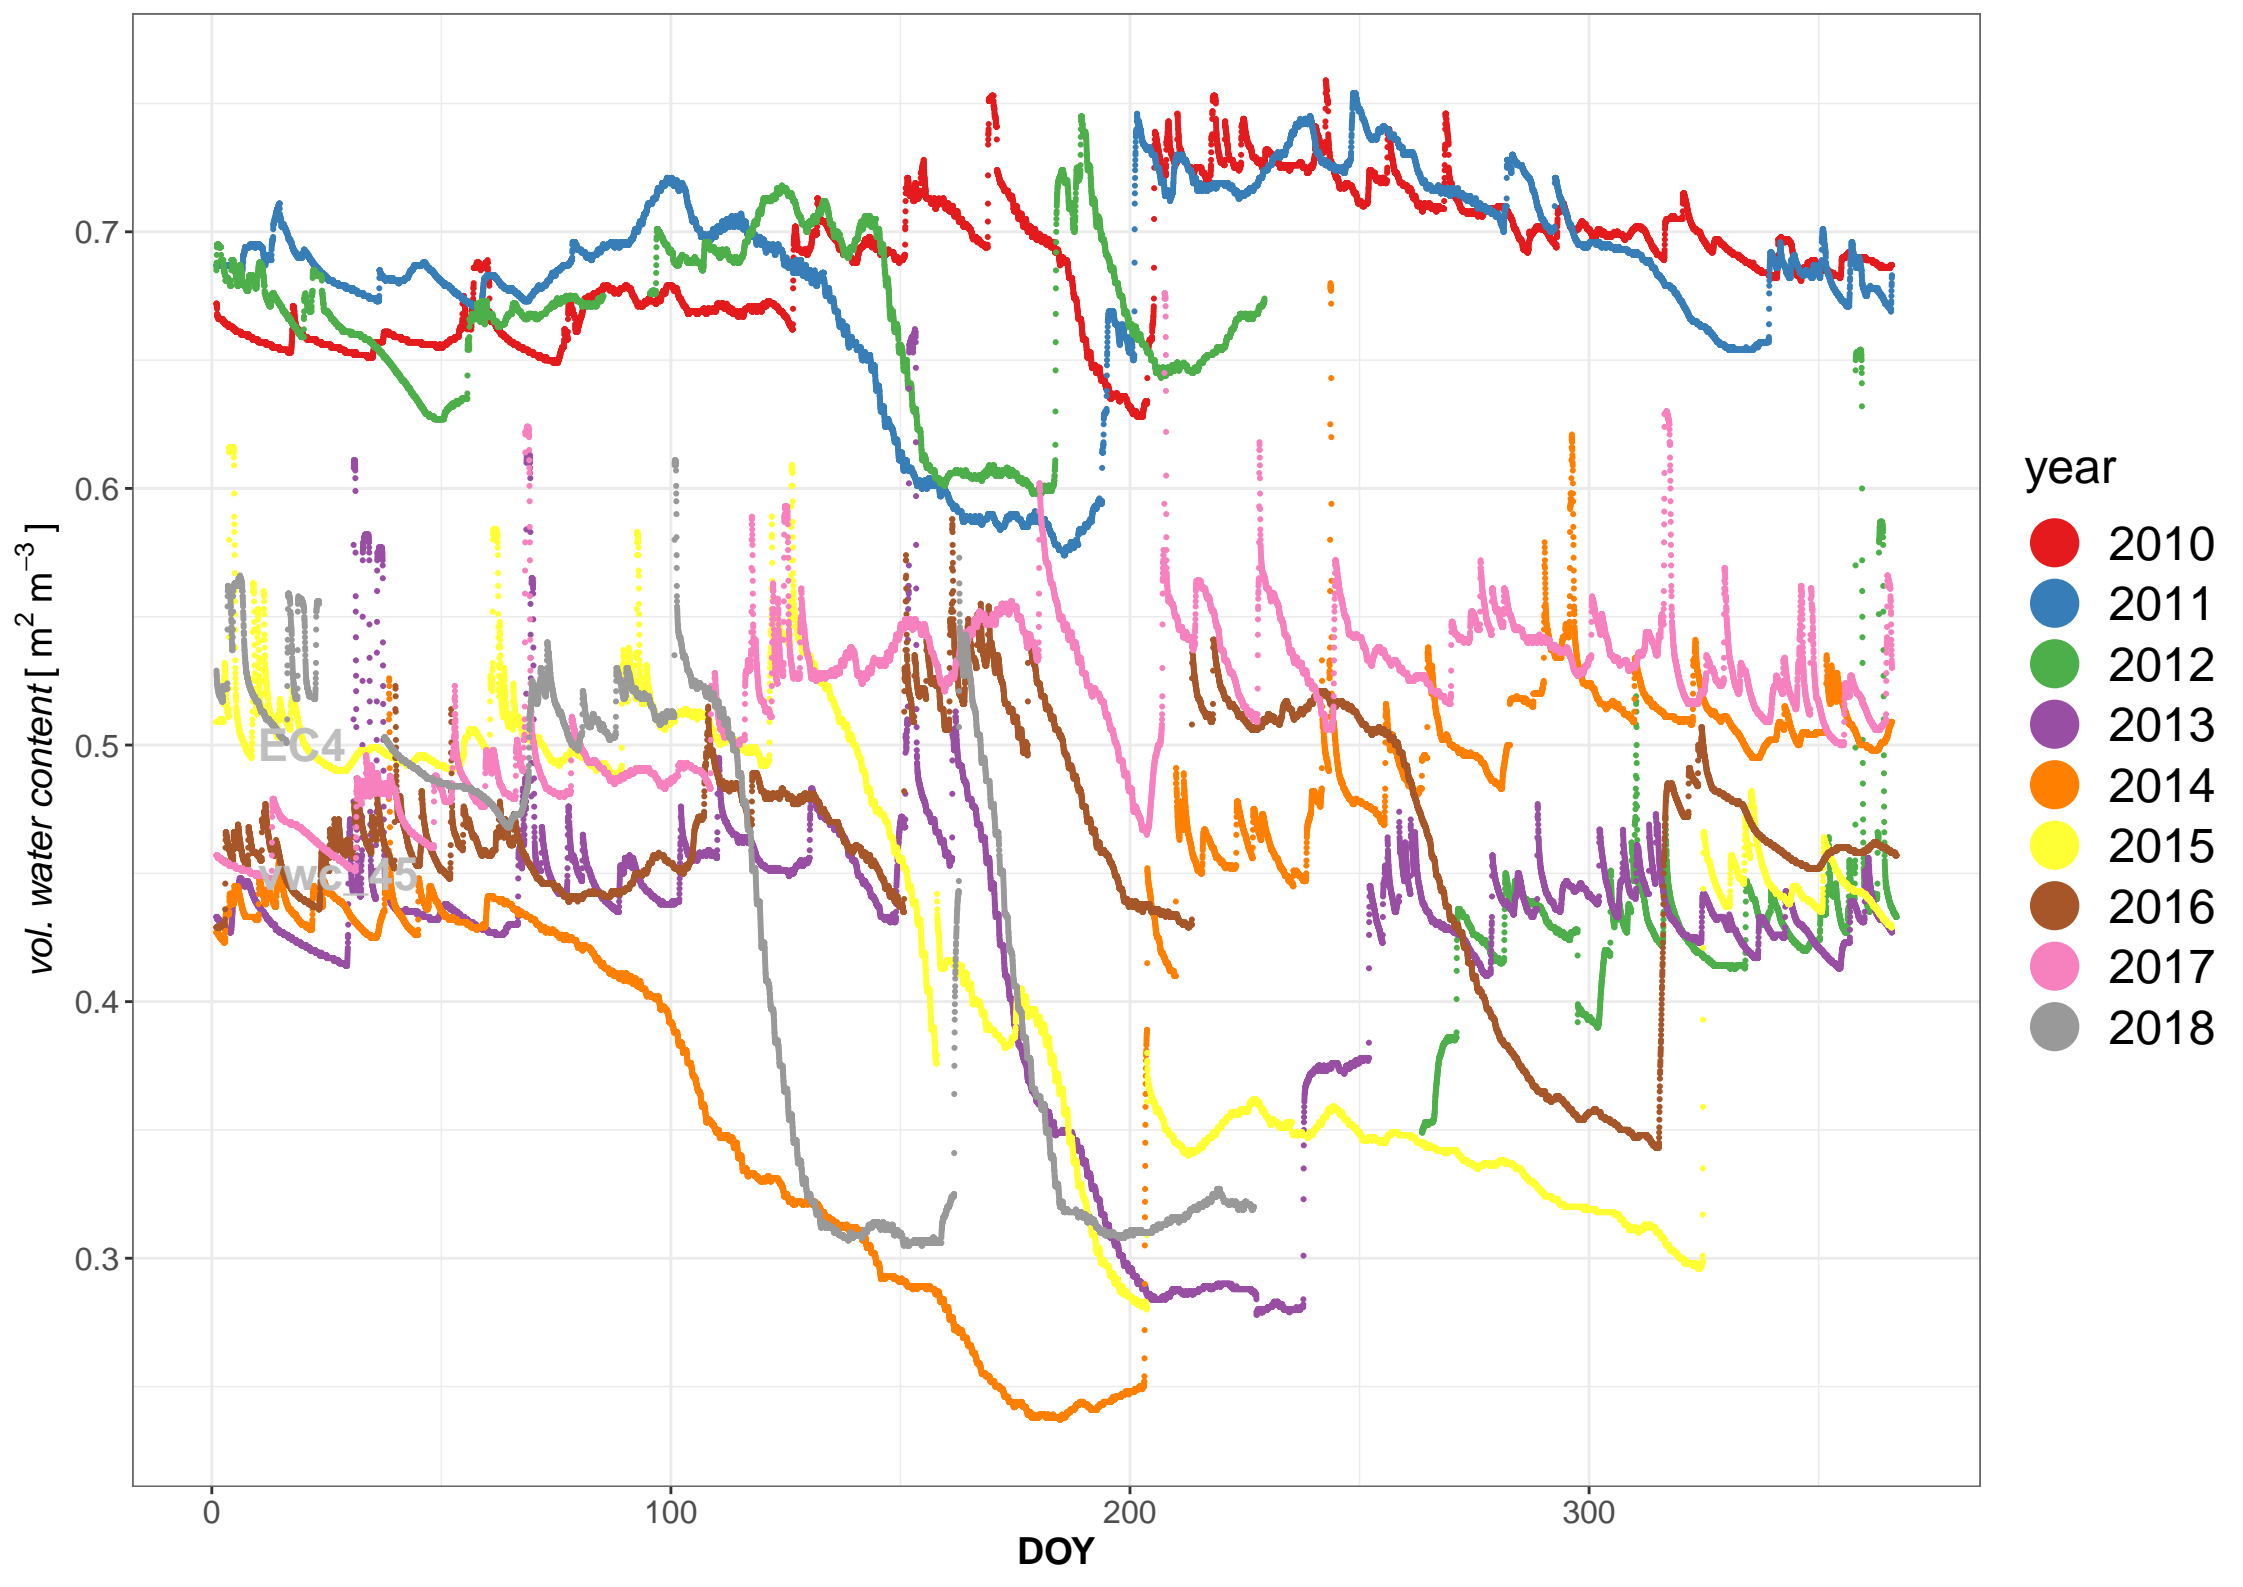

Supplement: Supplementary file 36 [file ec4vwc_45_DOY.pdf › ec4vwc_45_DOY.pdf]

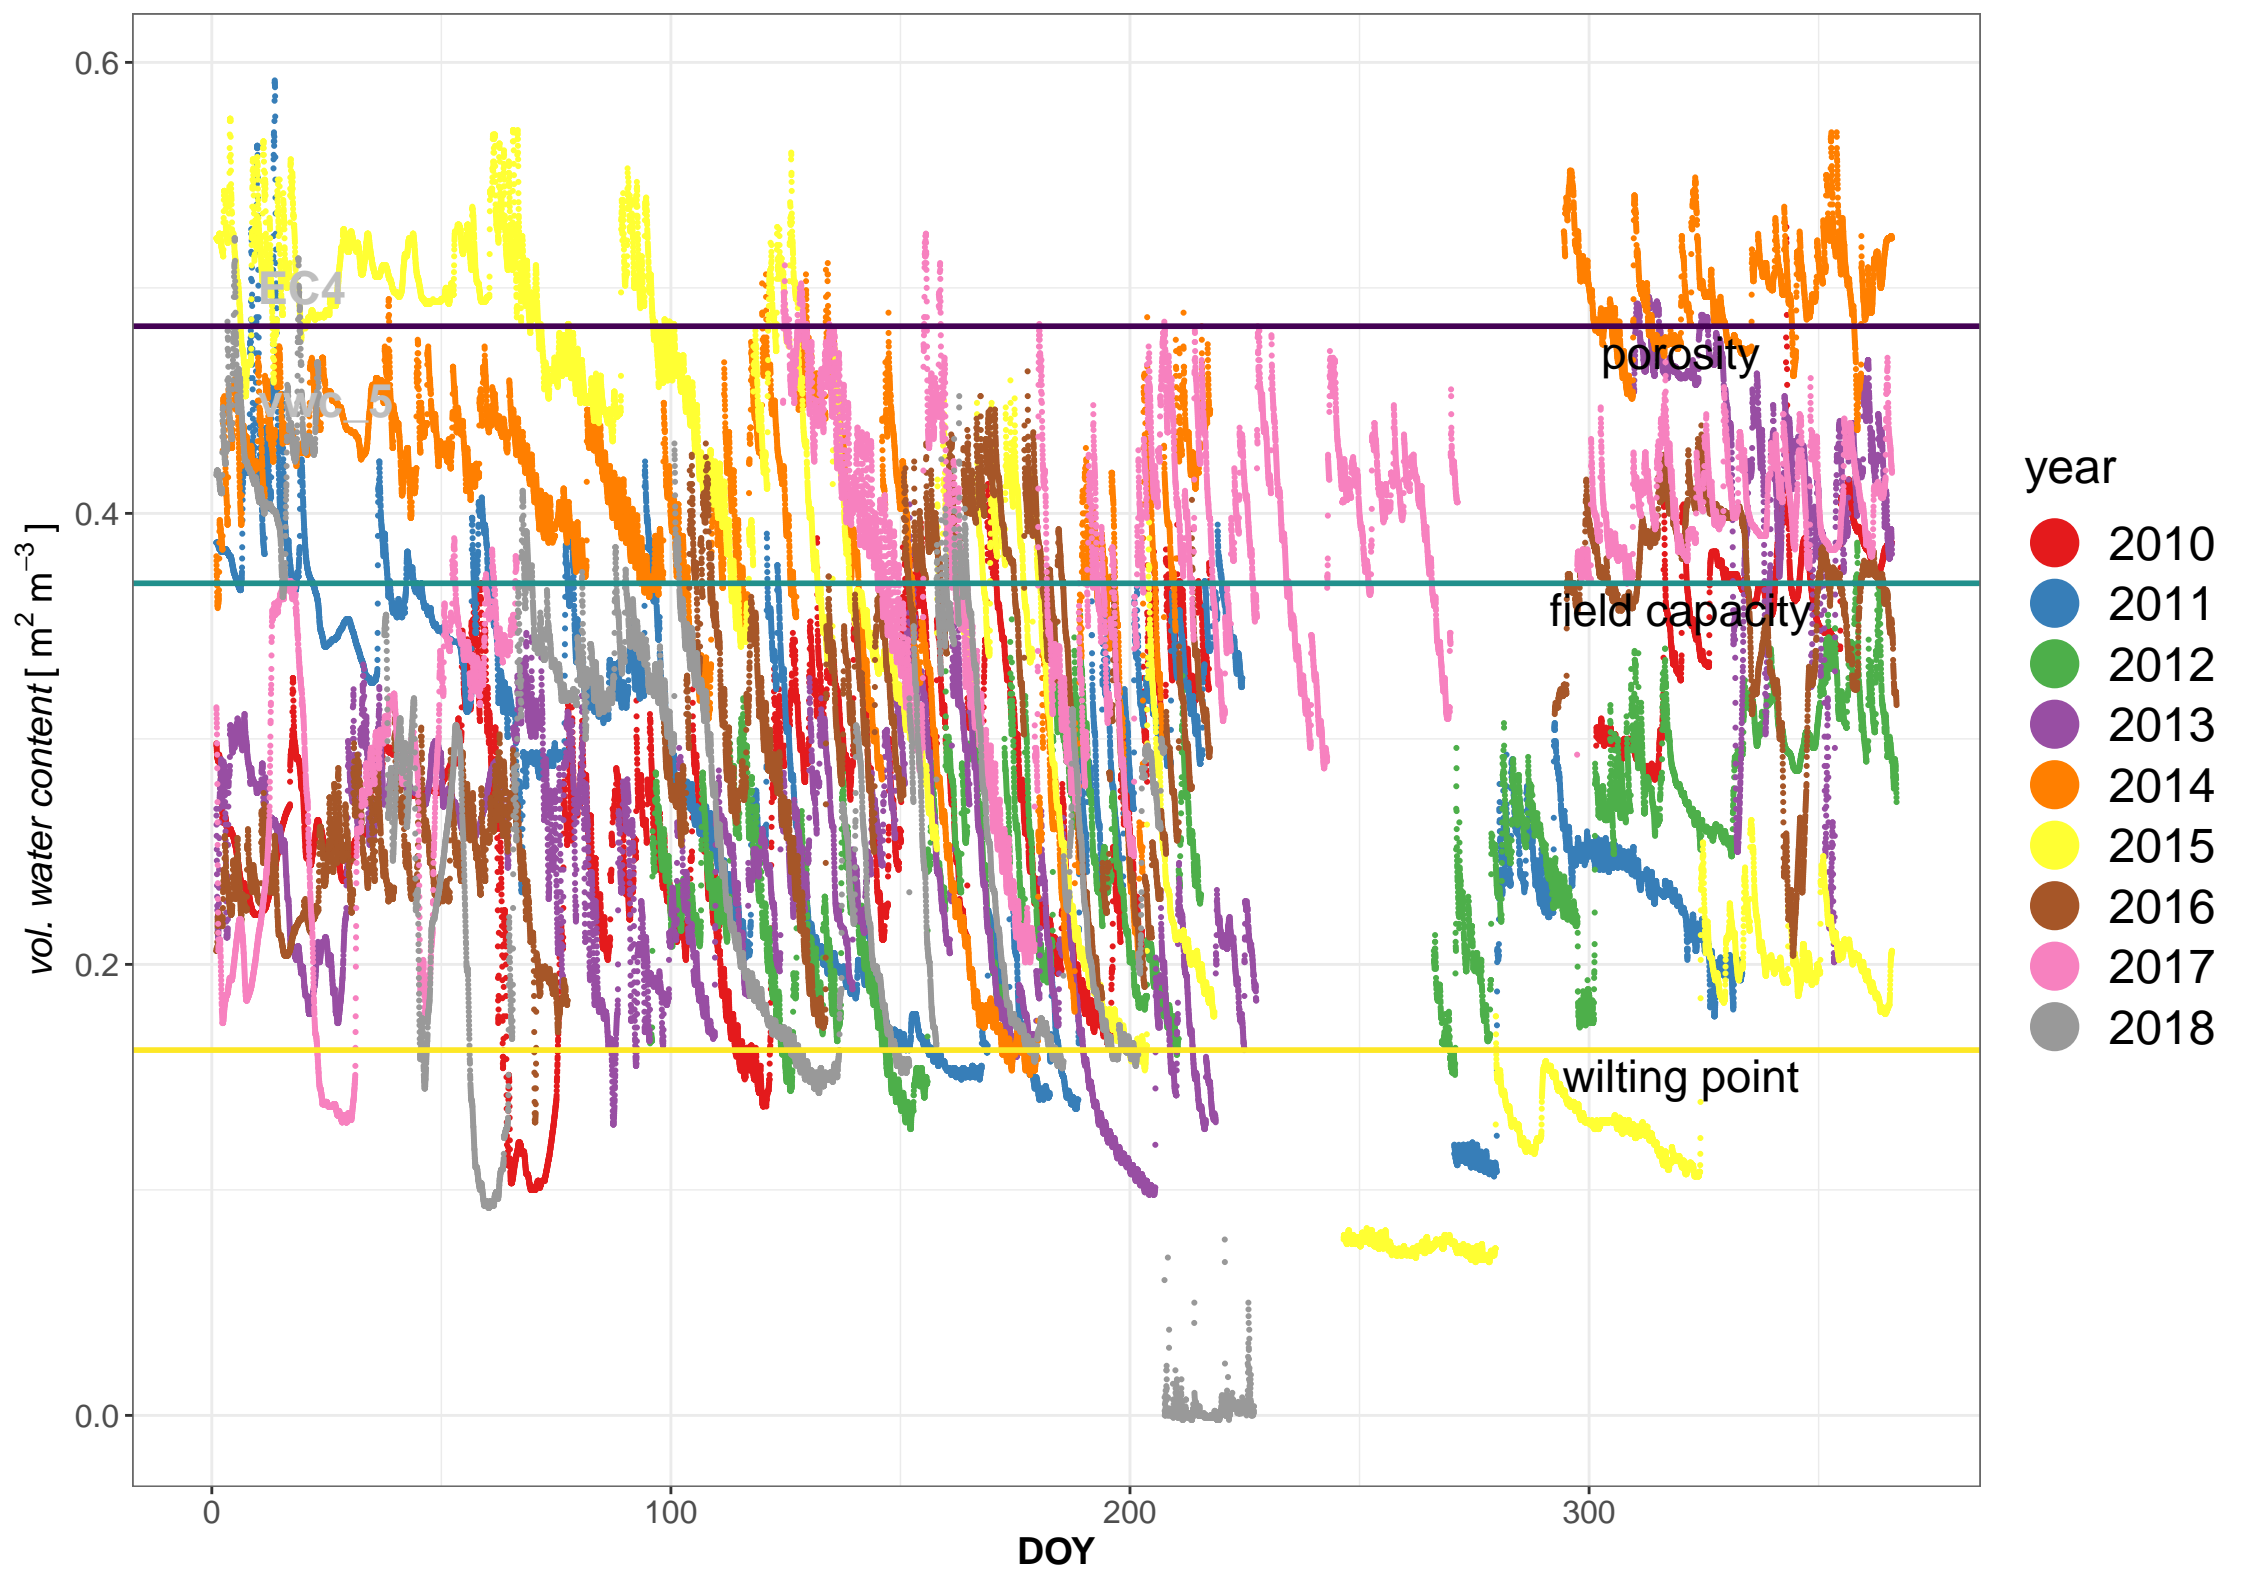

Supplement: Supplementary file 38 [file ec4vwc_5_DOY.pdf › ec4vwc_5_DOY.pdf]

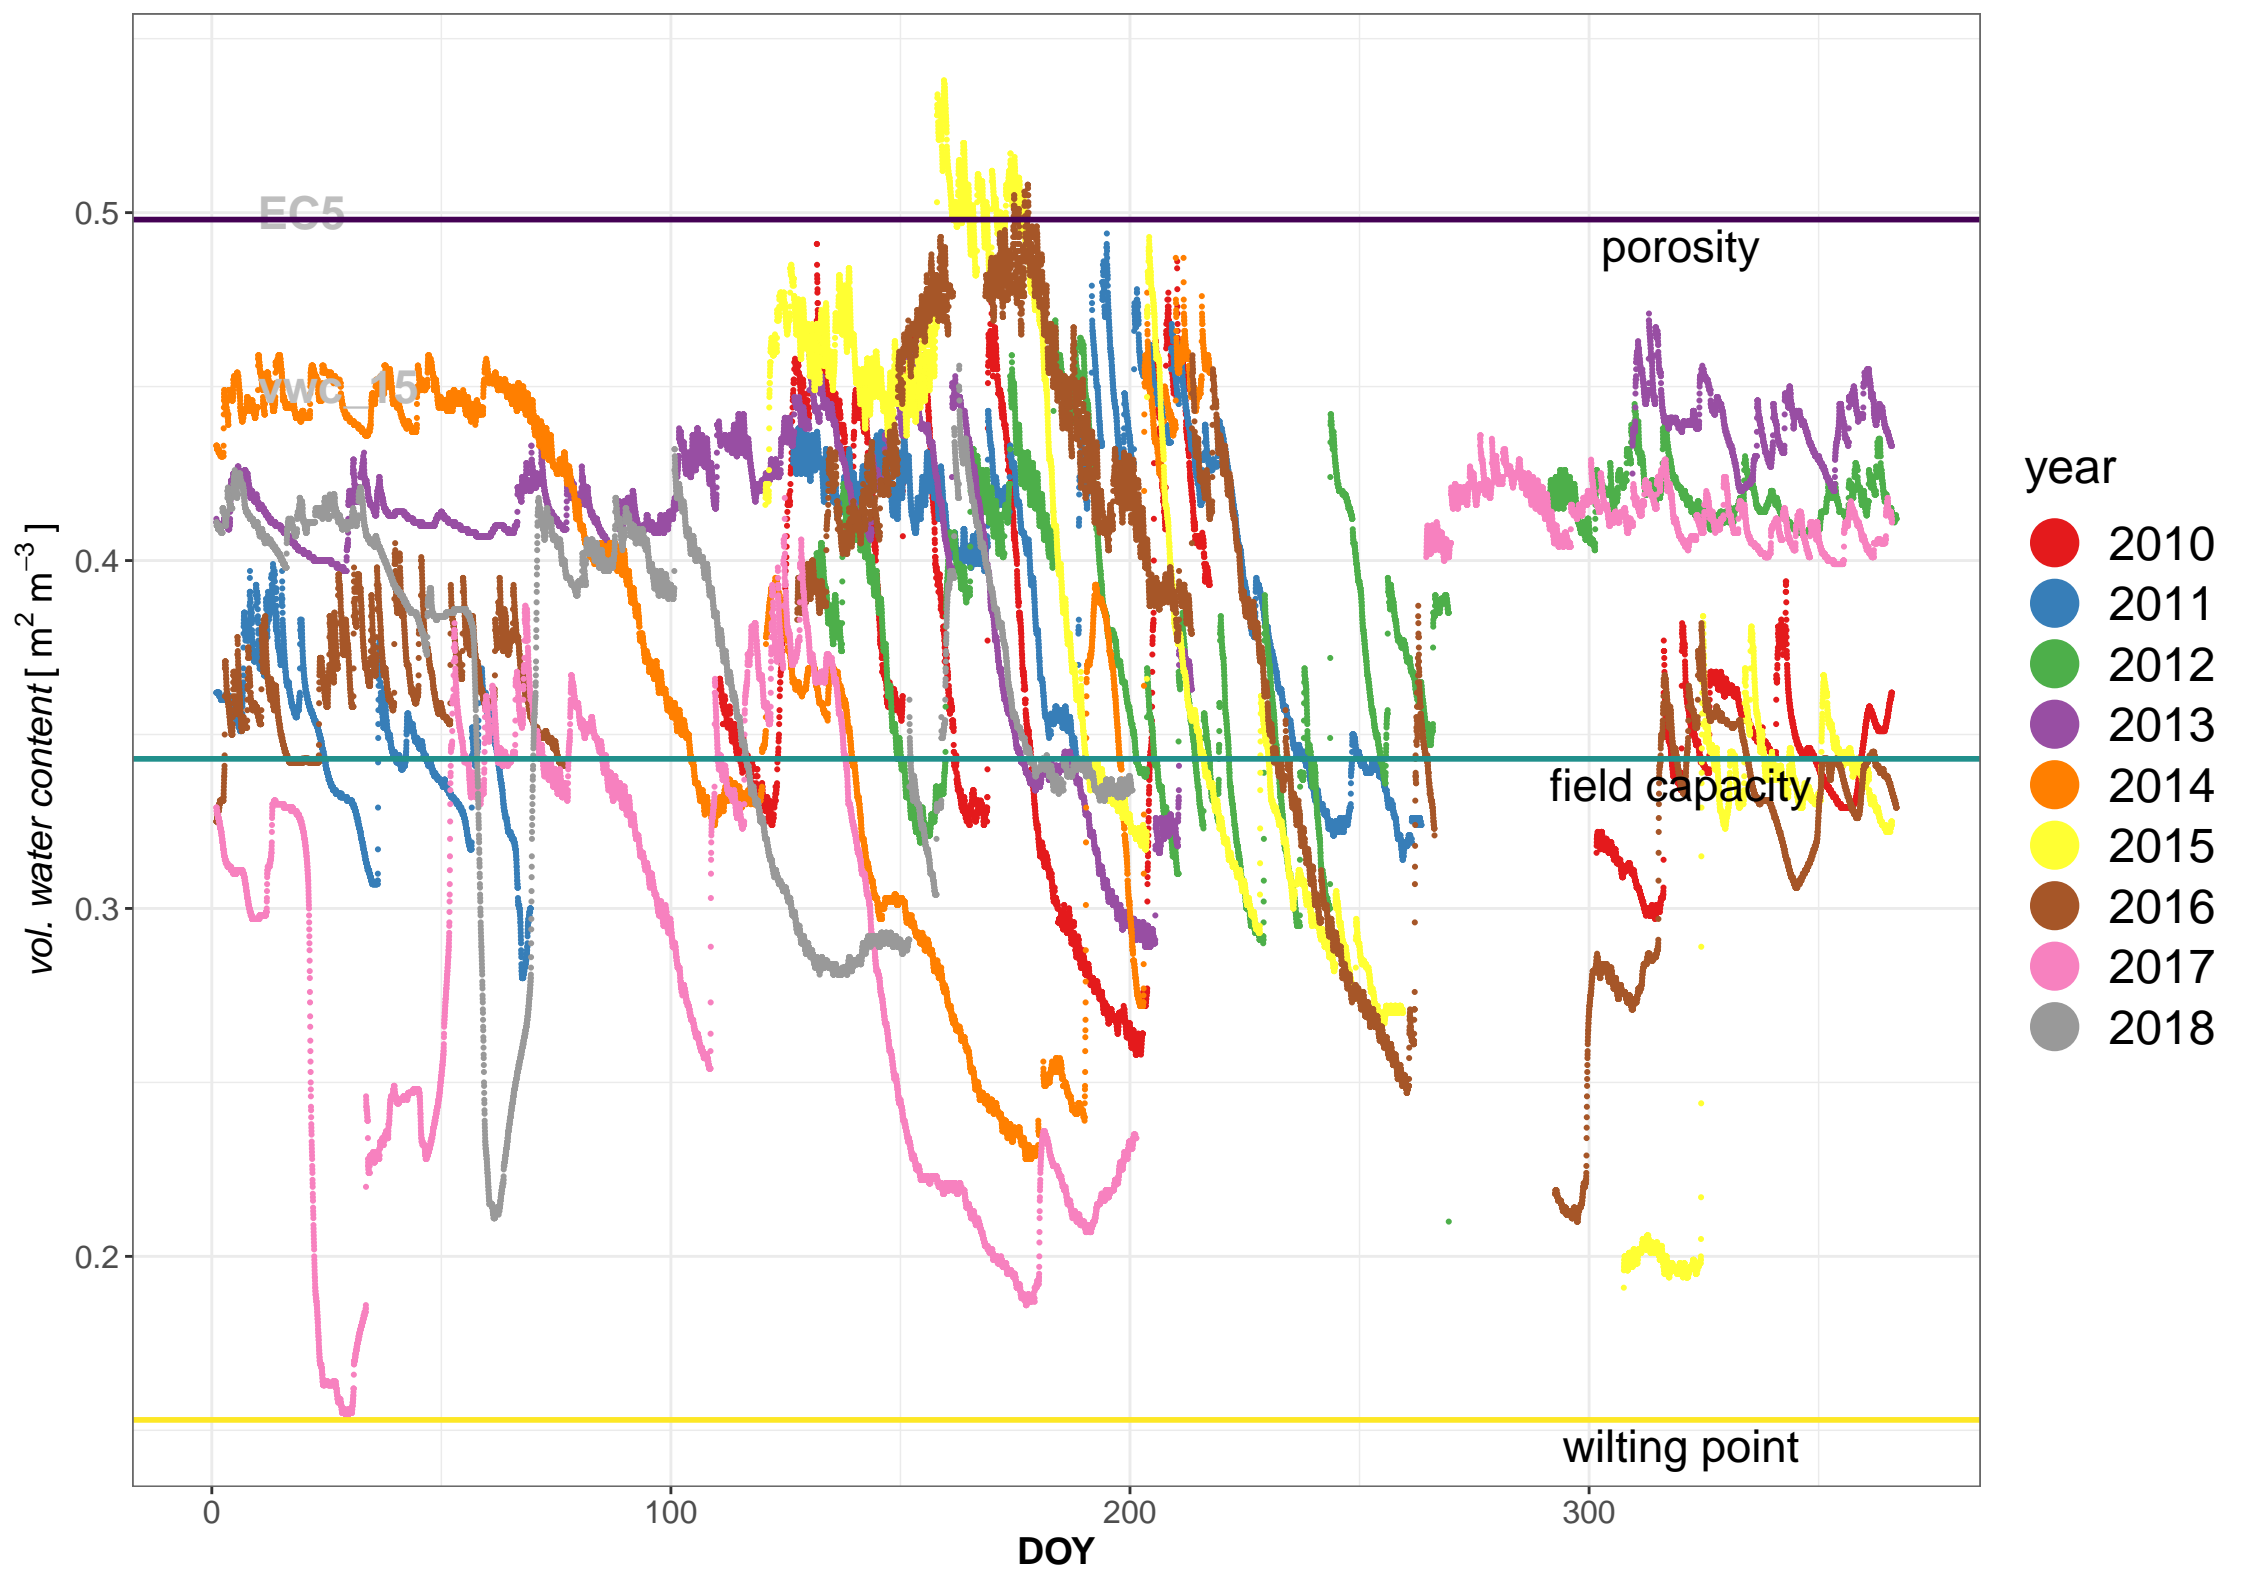

Supplement: Supplementary file 40 [file ec5vwc_15_DOY.pdf › ec5vwc_15_DOY.pdf]

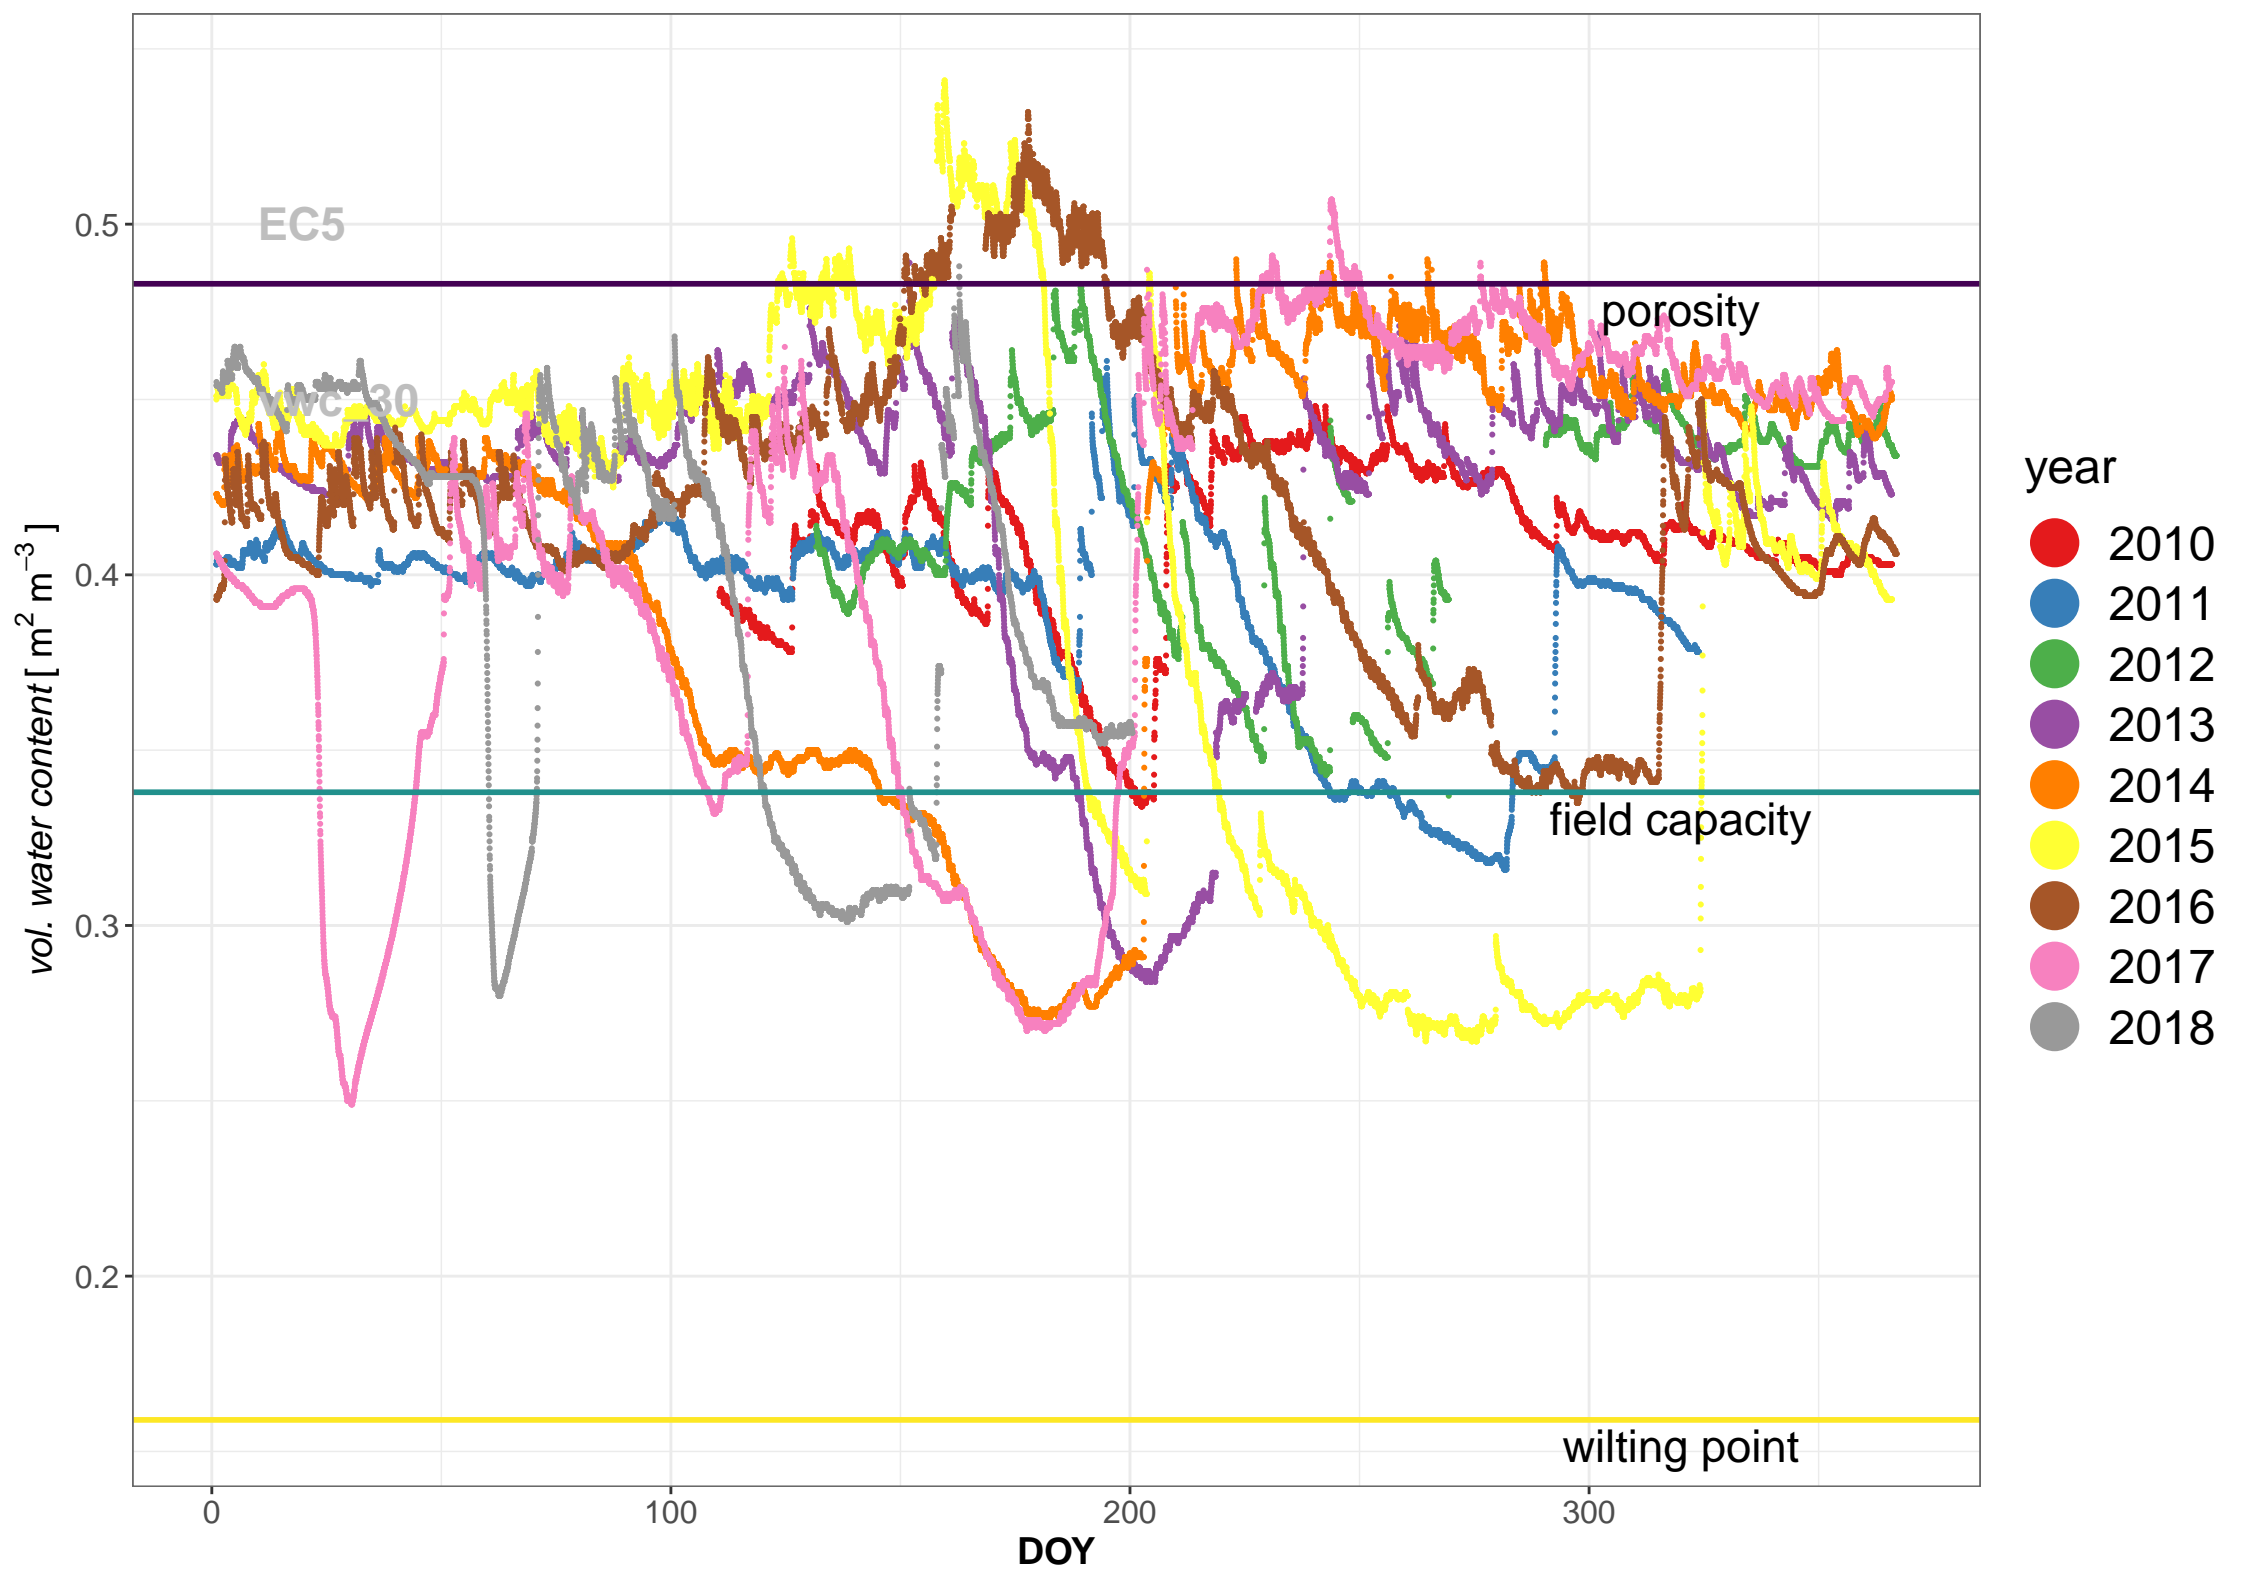

Supplement: Supplementary file 42 [file ec5vwc_30_DOY.pdf › ec5vwc_30_DOY.pdf]

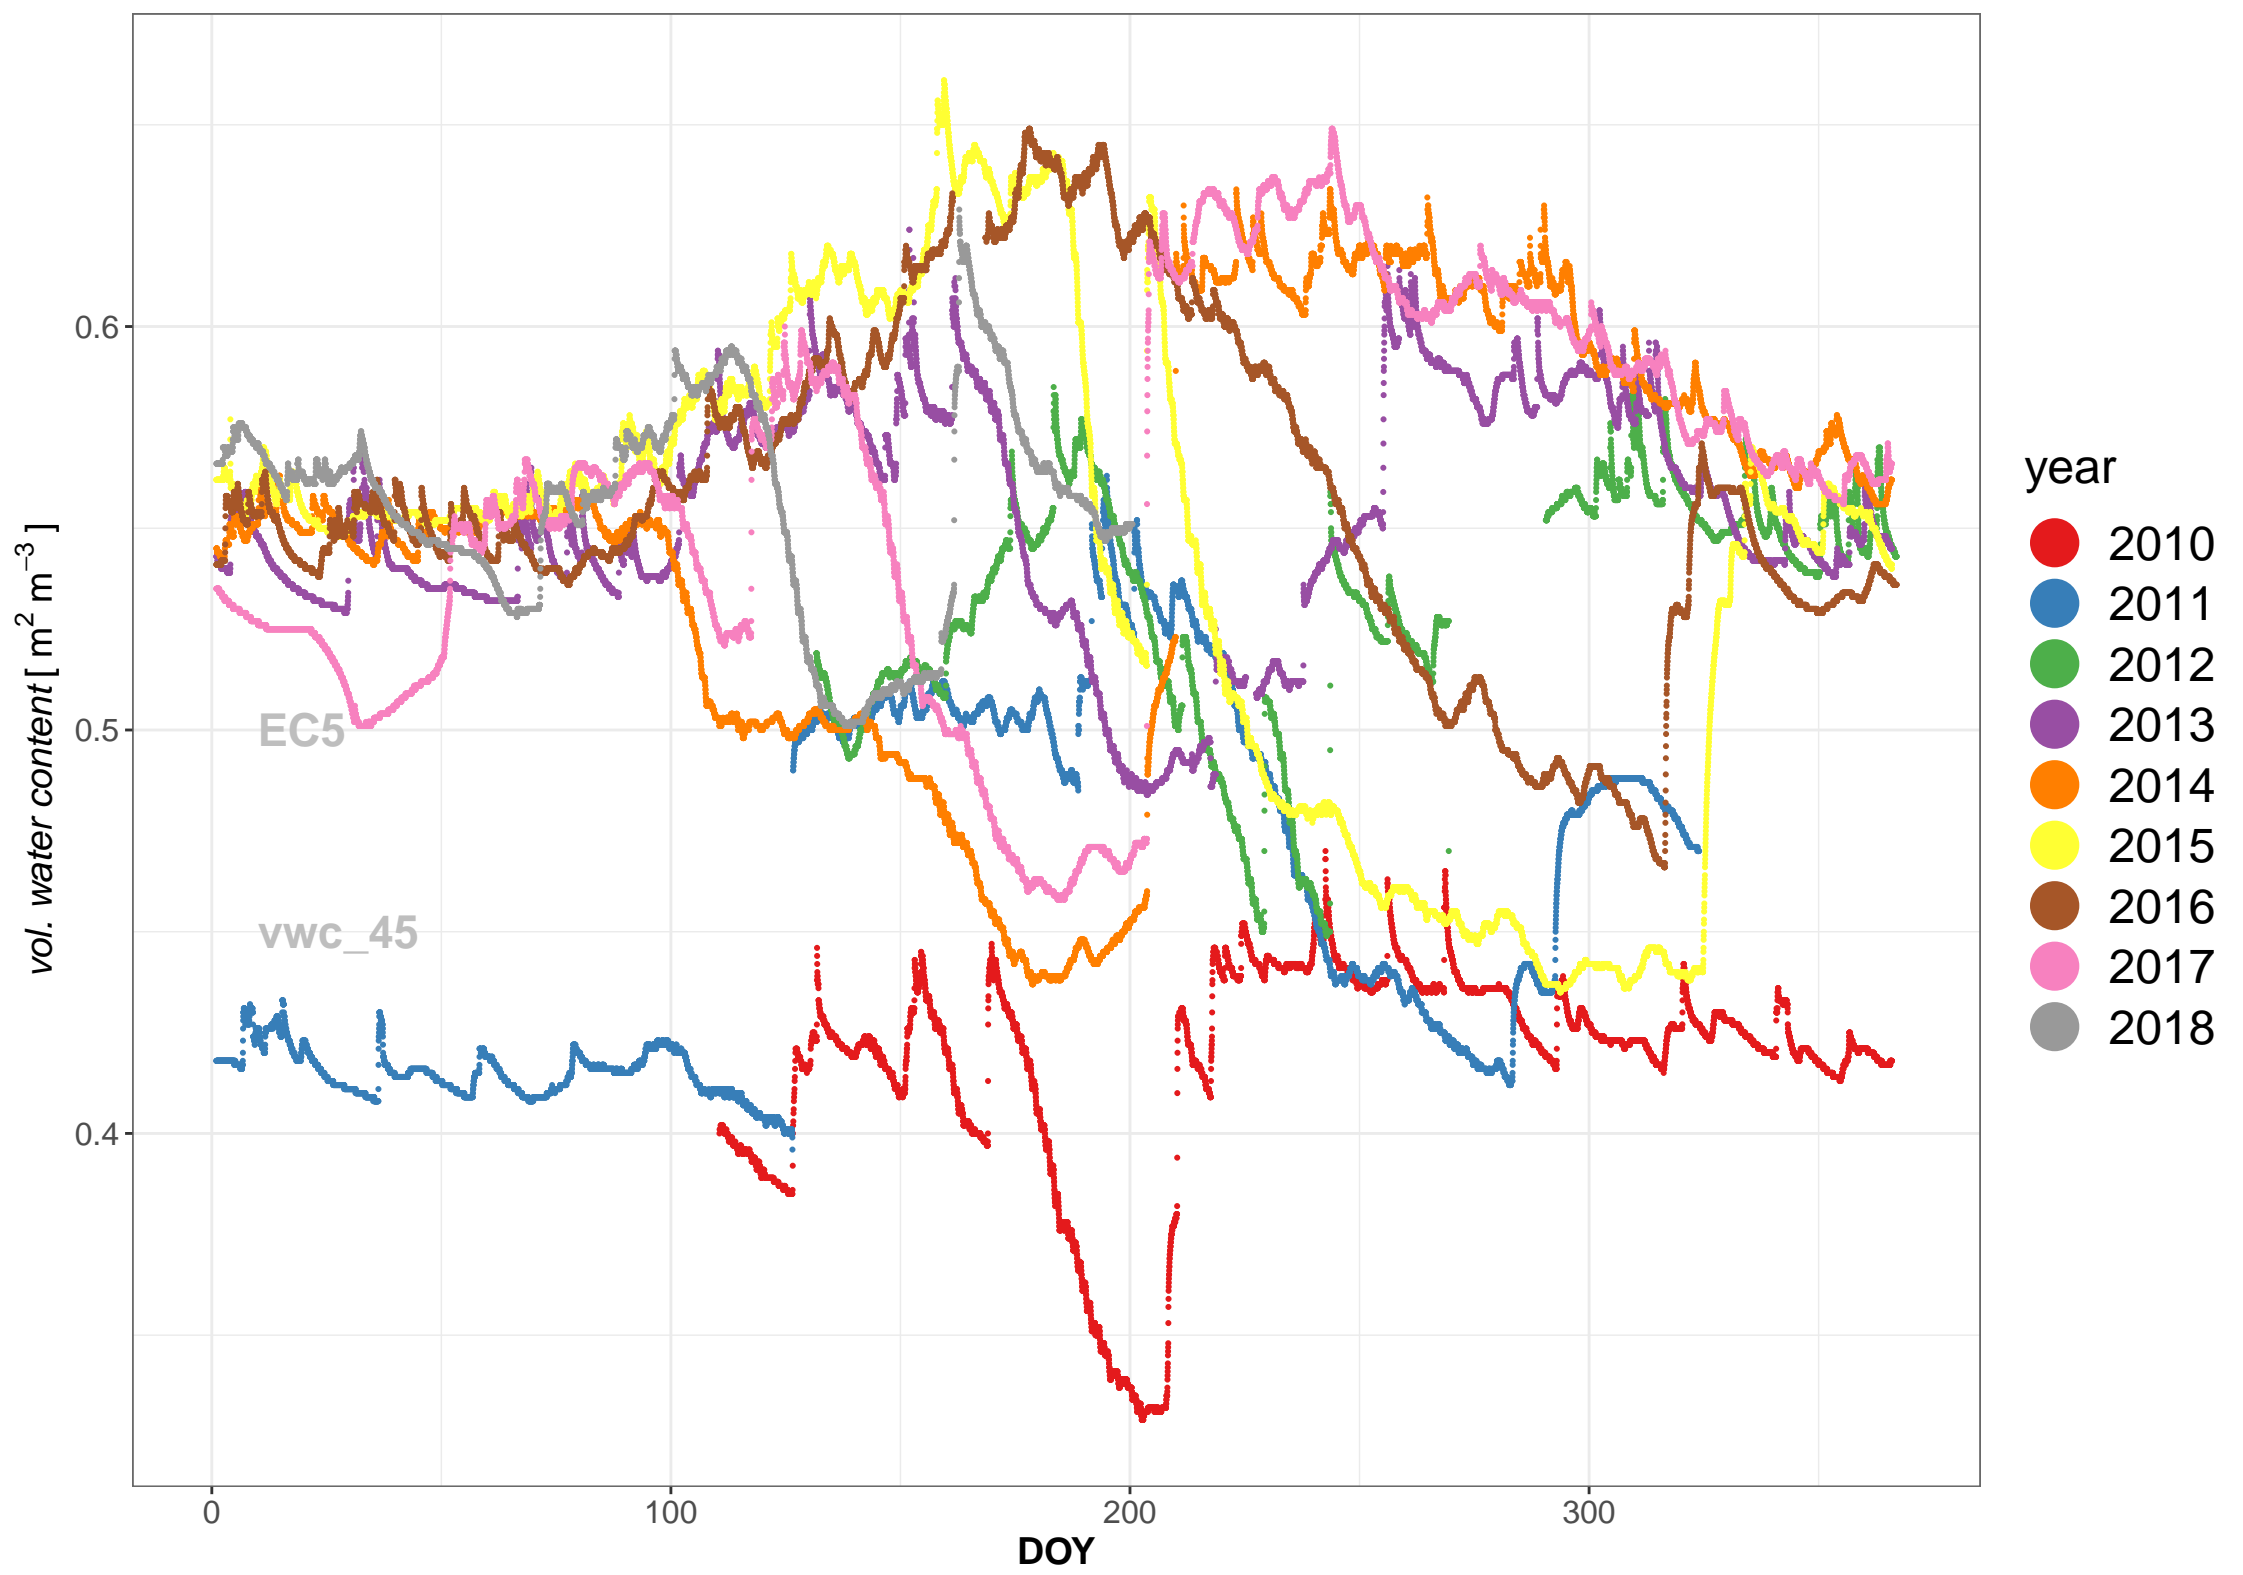

Supplement: Supplementary file 44 [file ec5vwc_45_DOY.pdf › ec5vwc_45_DOY.pdf]

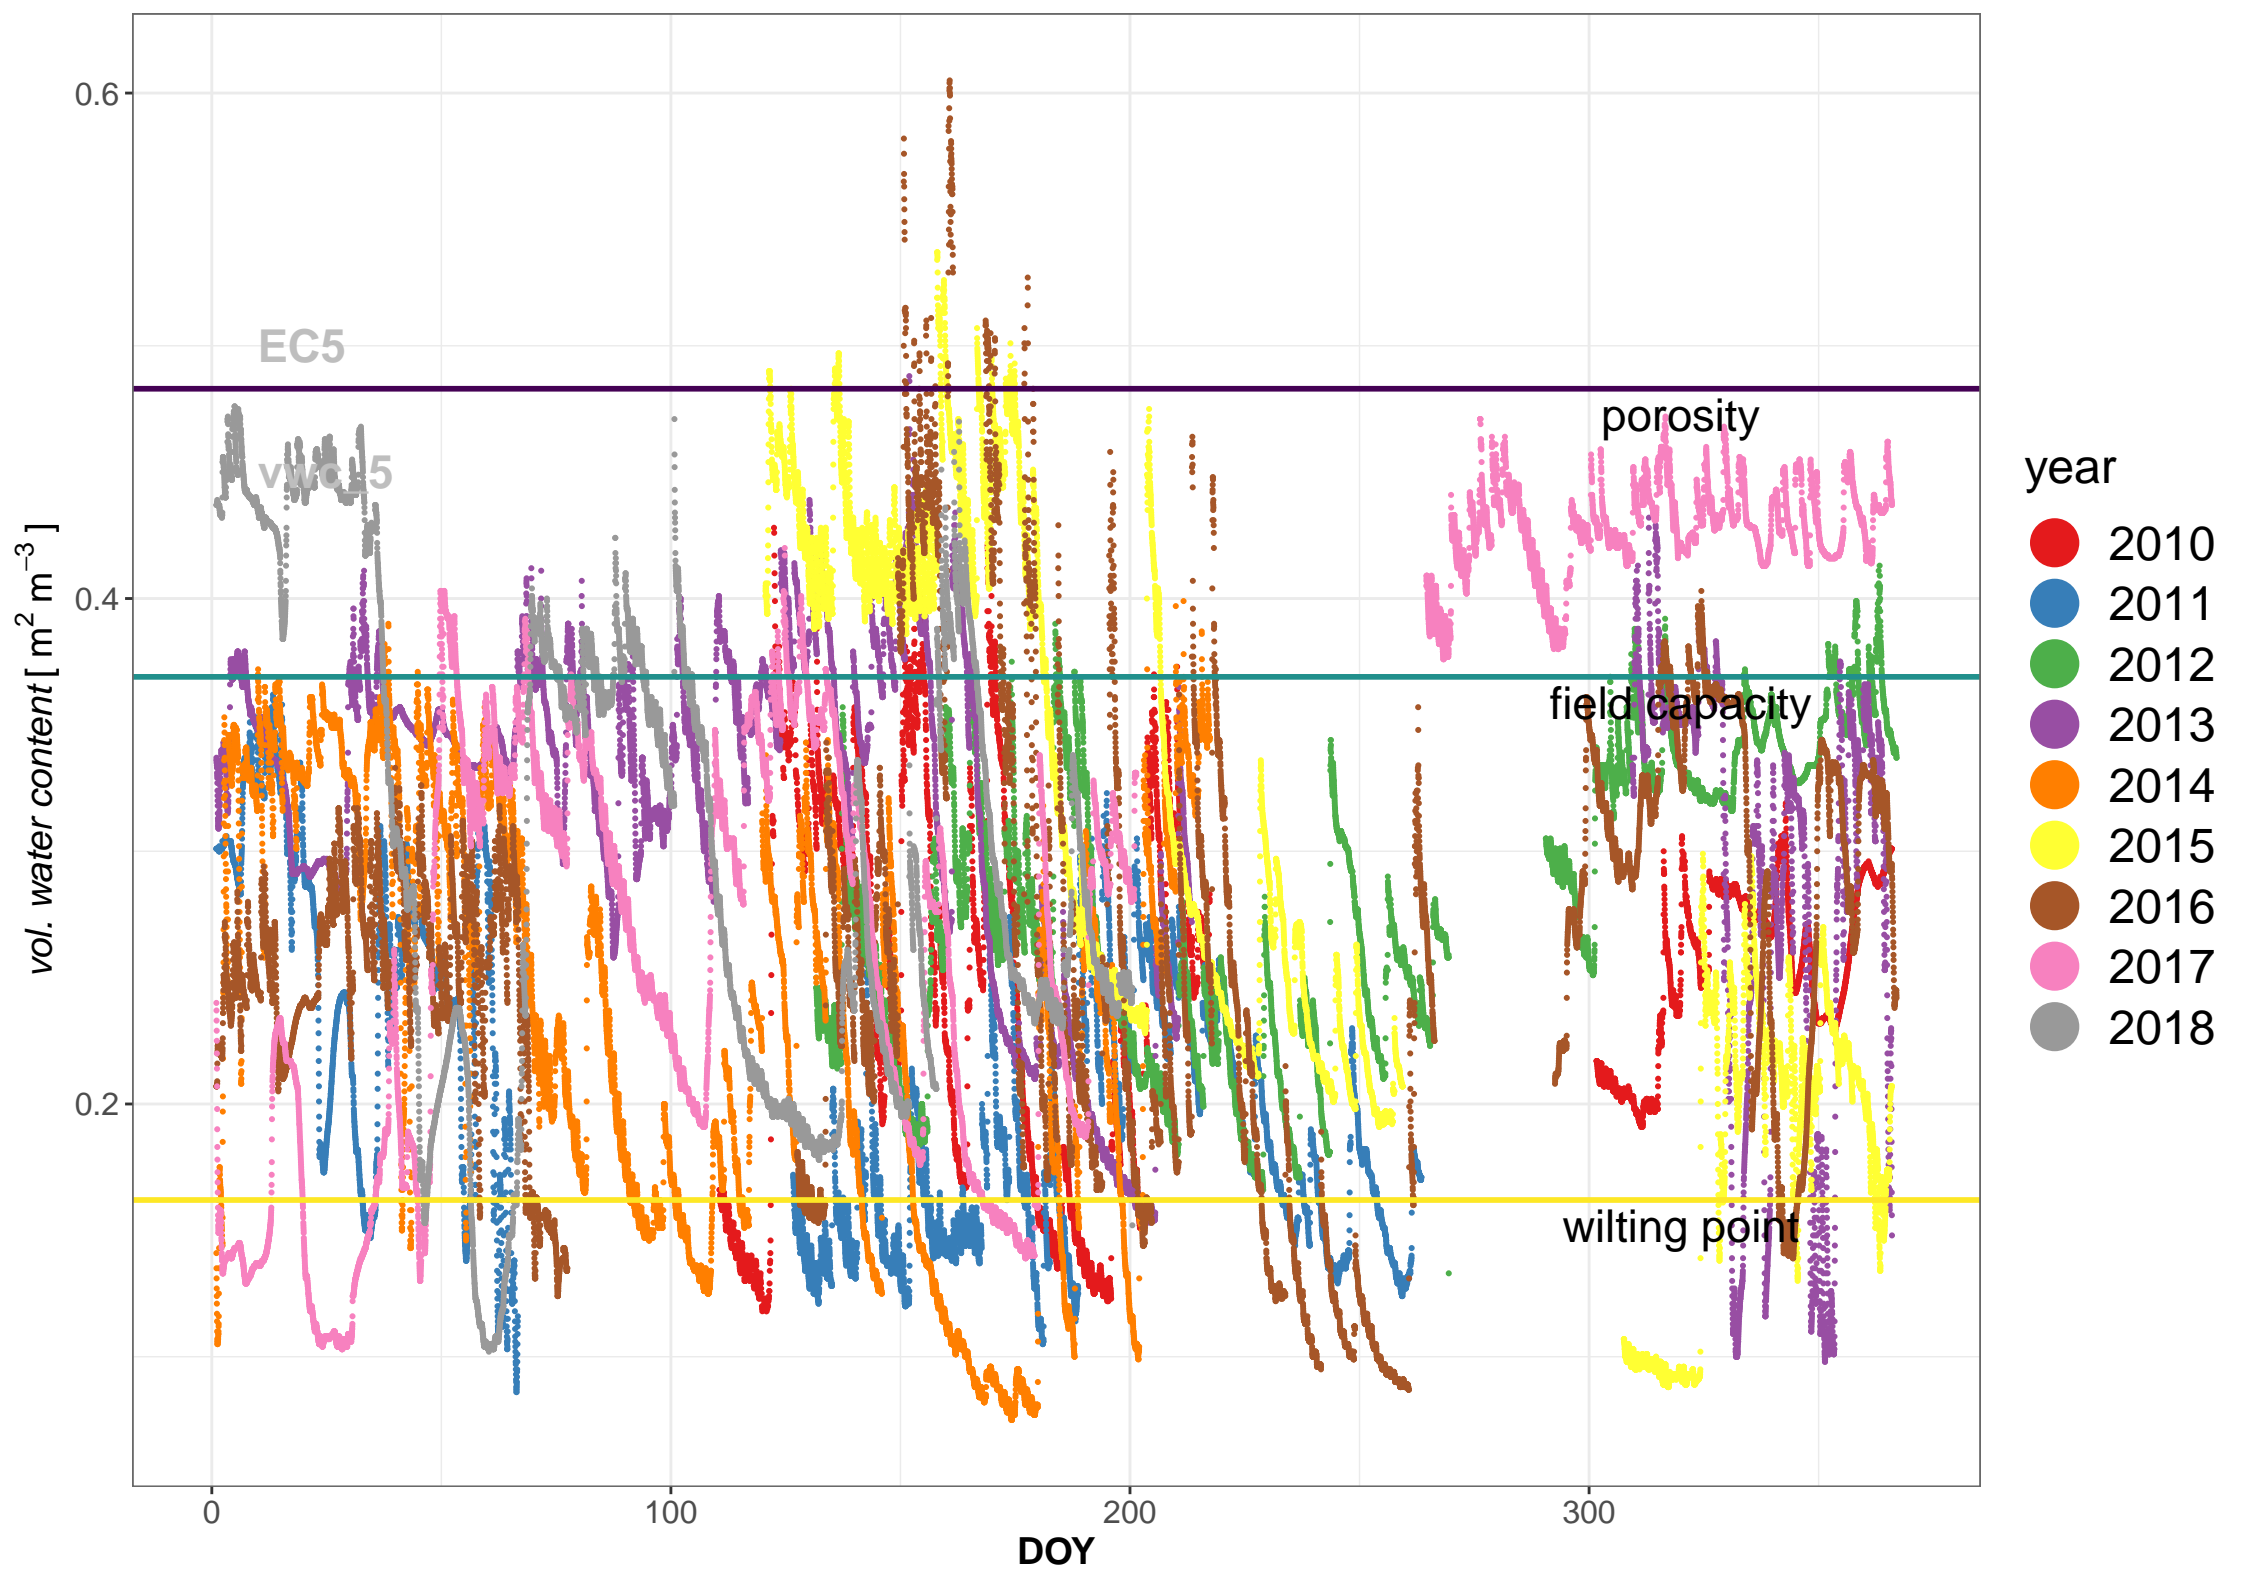

Supplement: Supplementary file 46 [file ec5vwc_5_DOY.pdf › ec5vwc_5_DOY.pdf]

ec5 2010  
depth 75 cm

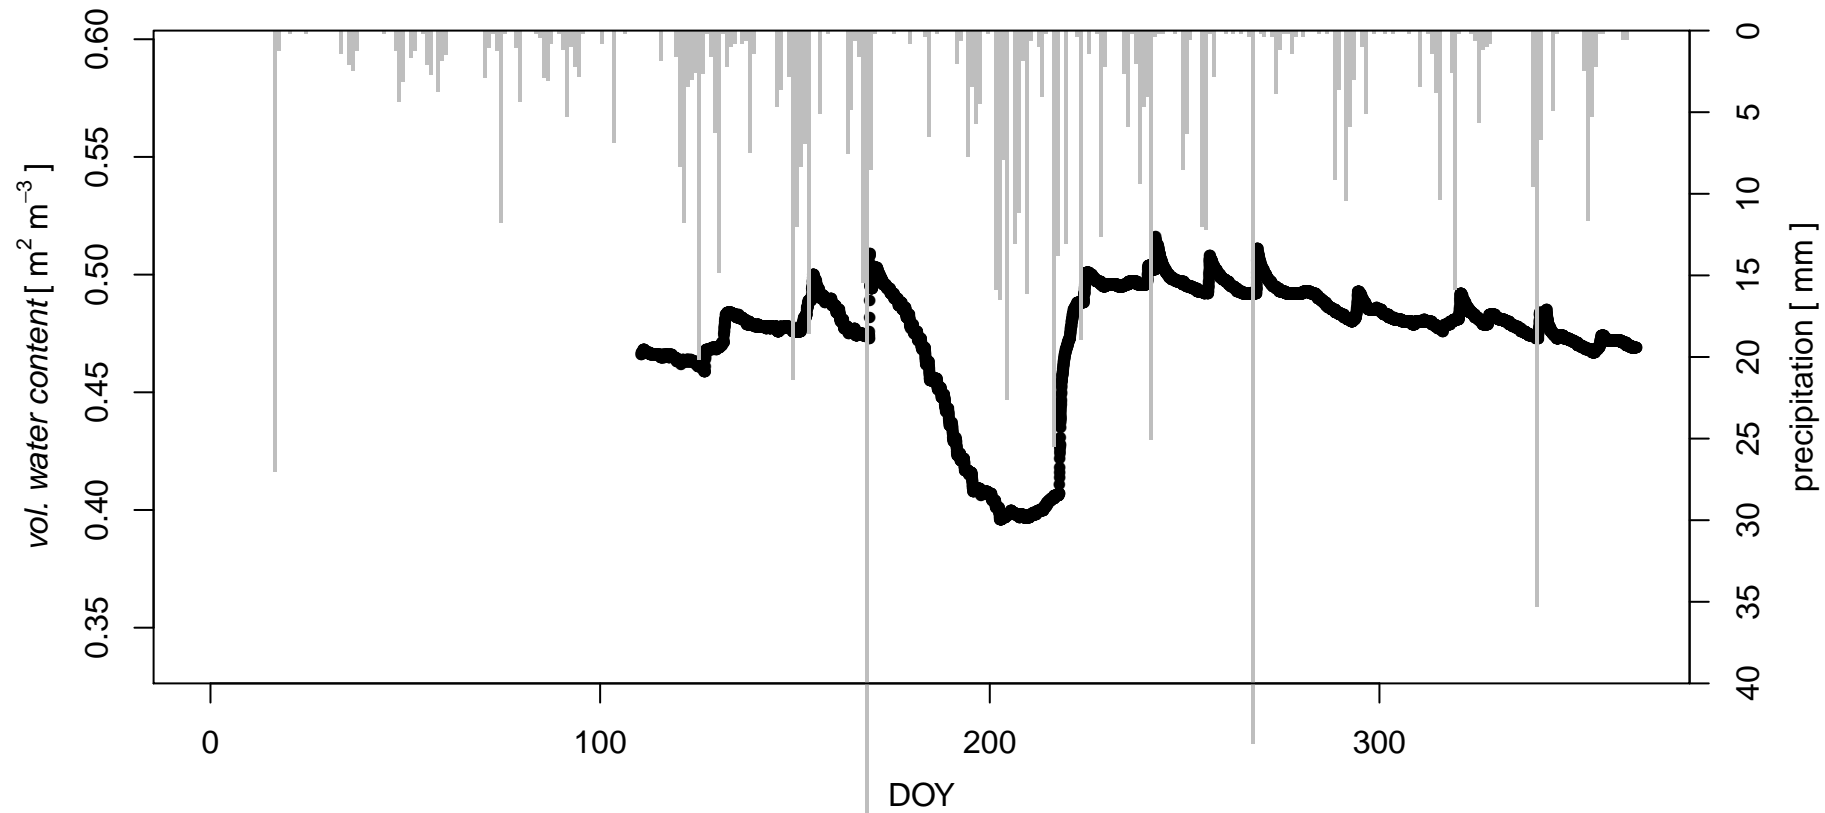

ec5 2011  
depth 75 cm

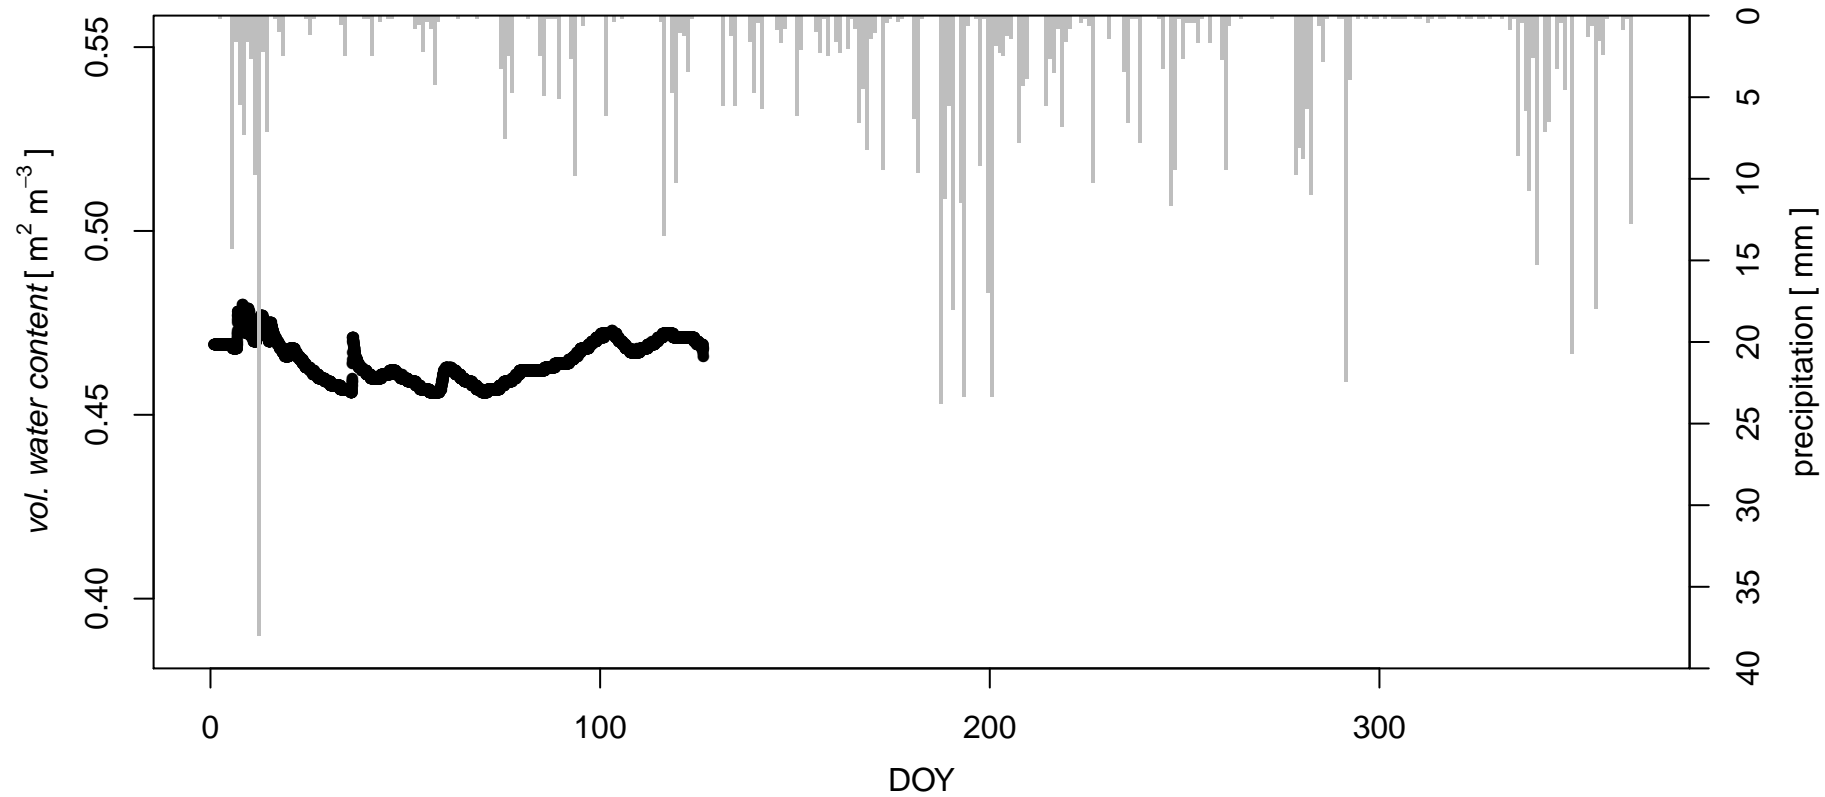

Supplement: Supplementary file 47 [file ec5vwc_75.pdf › ec5vwc_75.pdf]

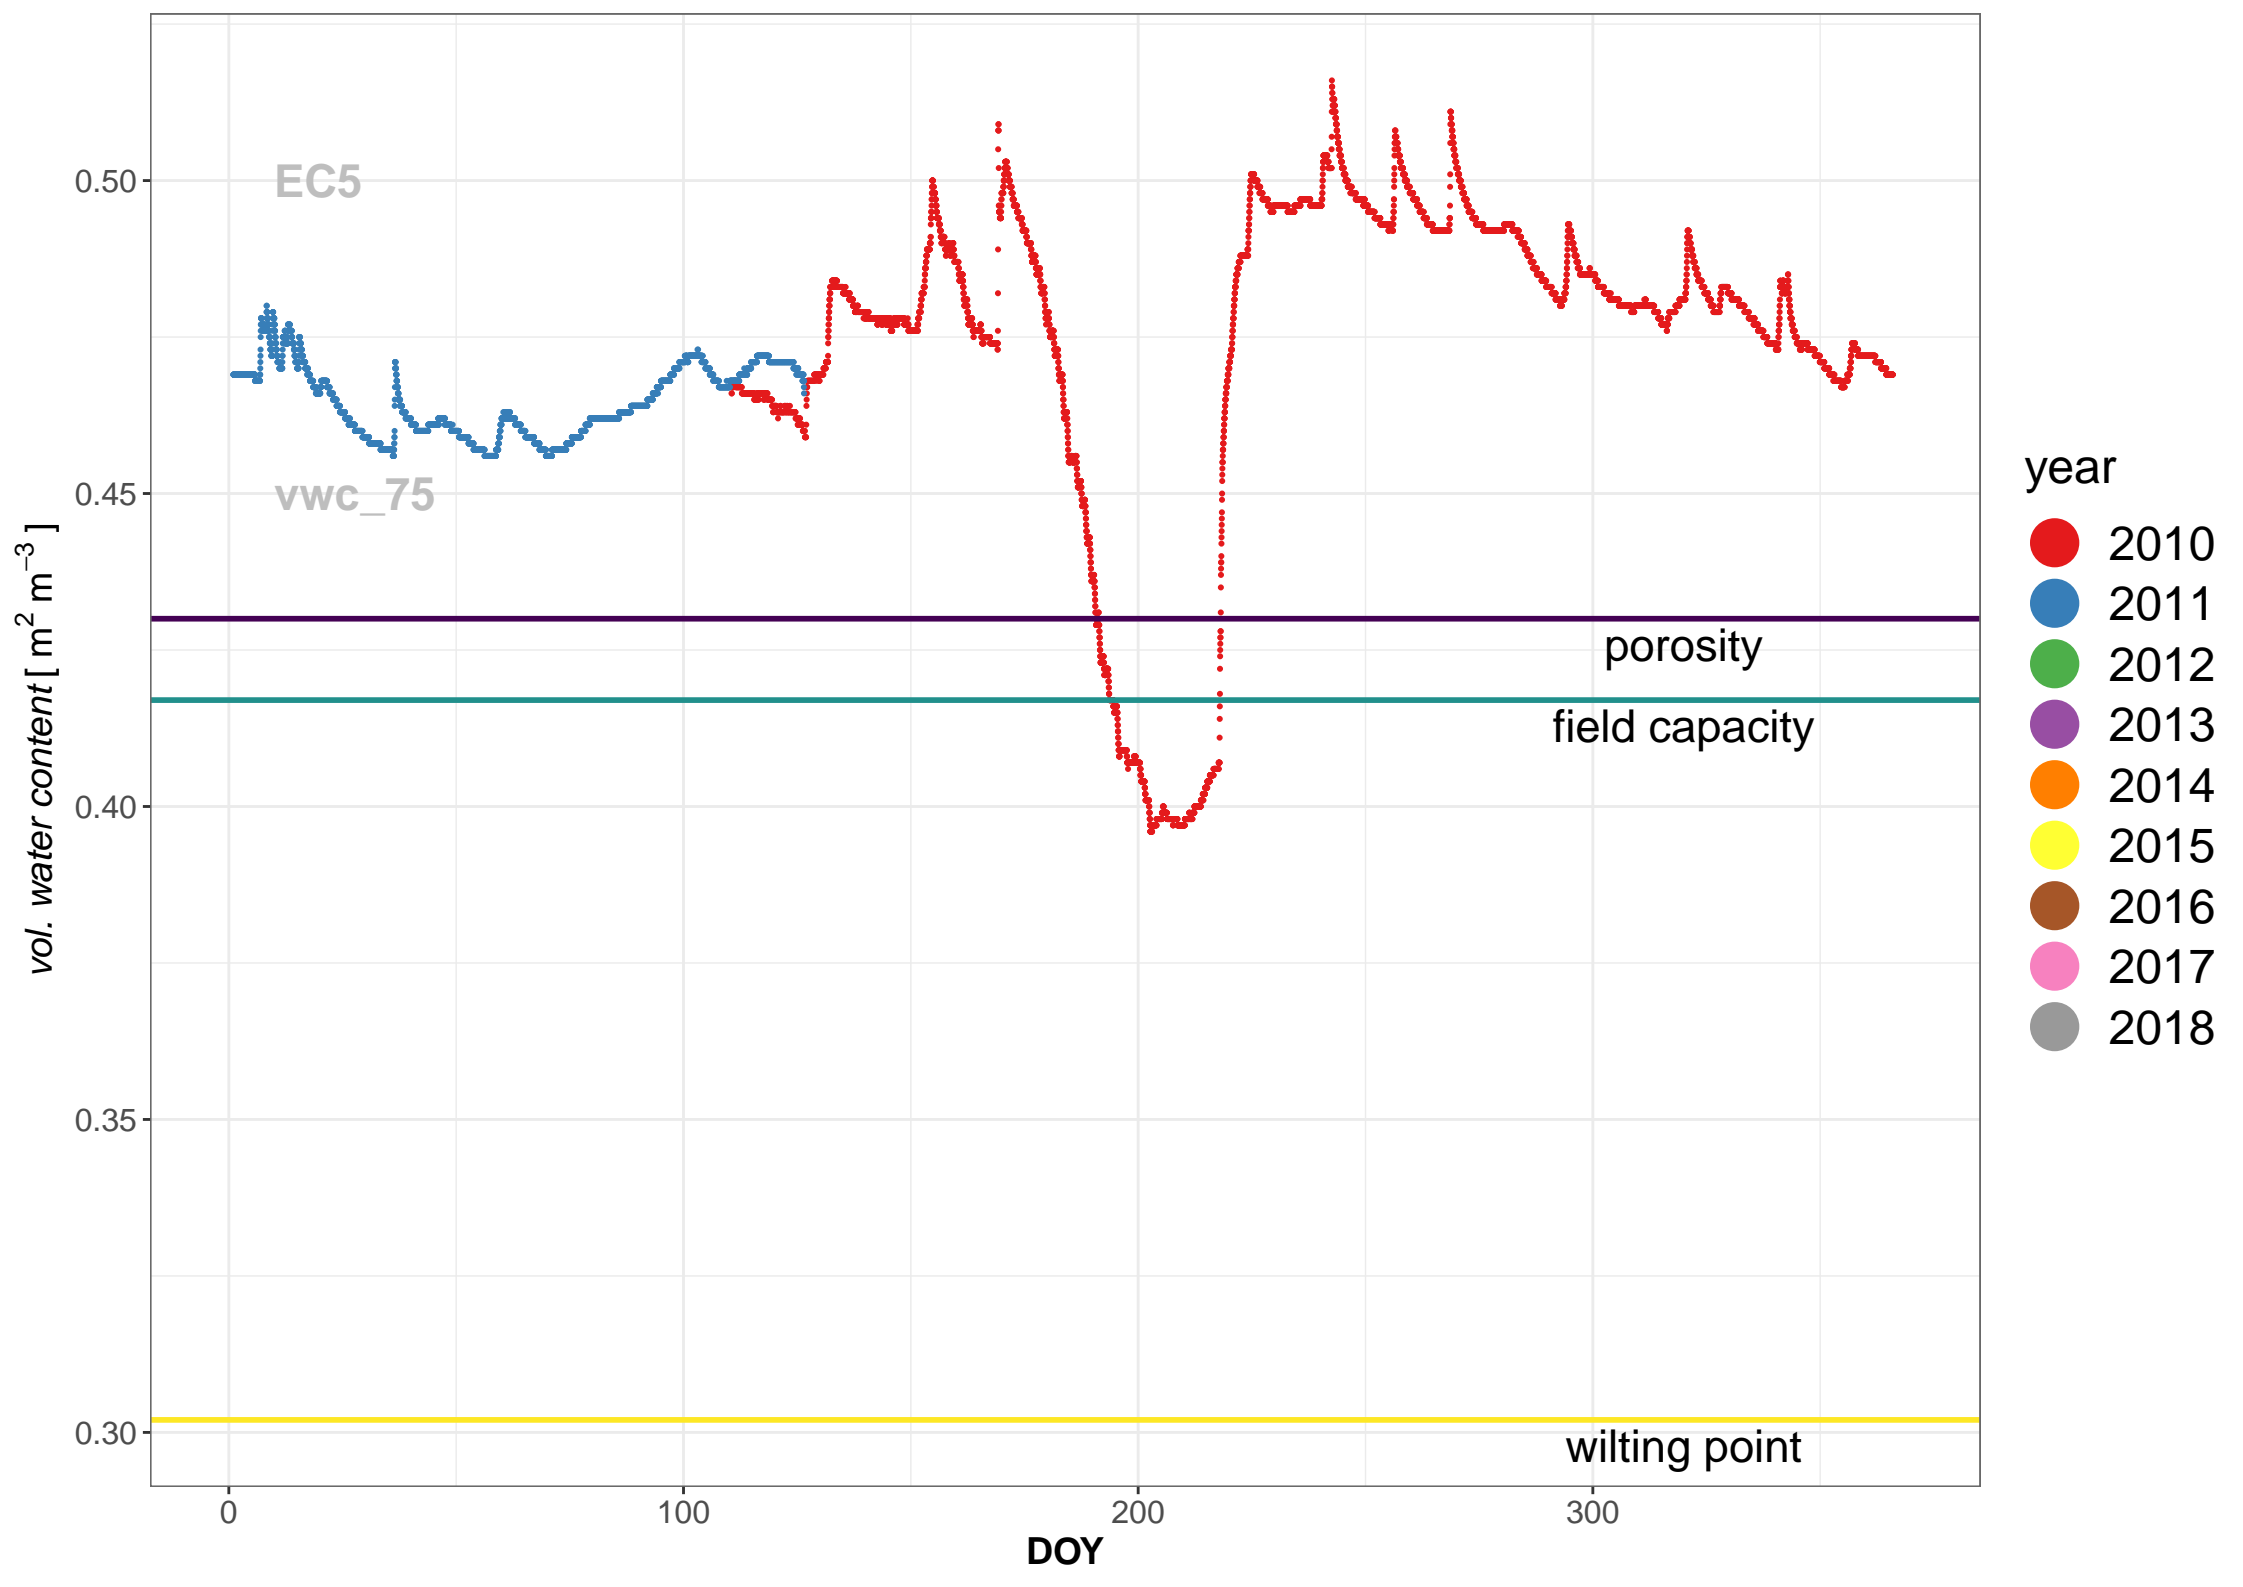

Supplement: Supplementary file 48 [file ec5vwc_75_DOY.pdf › ec5vwc_75_DOY.pdf]

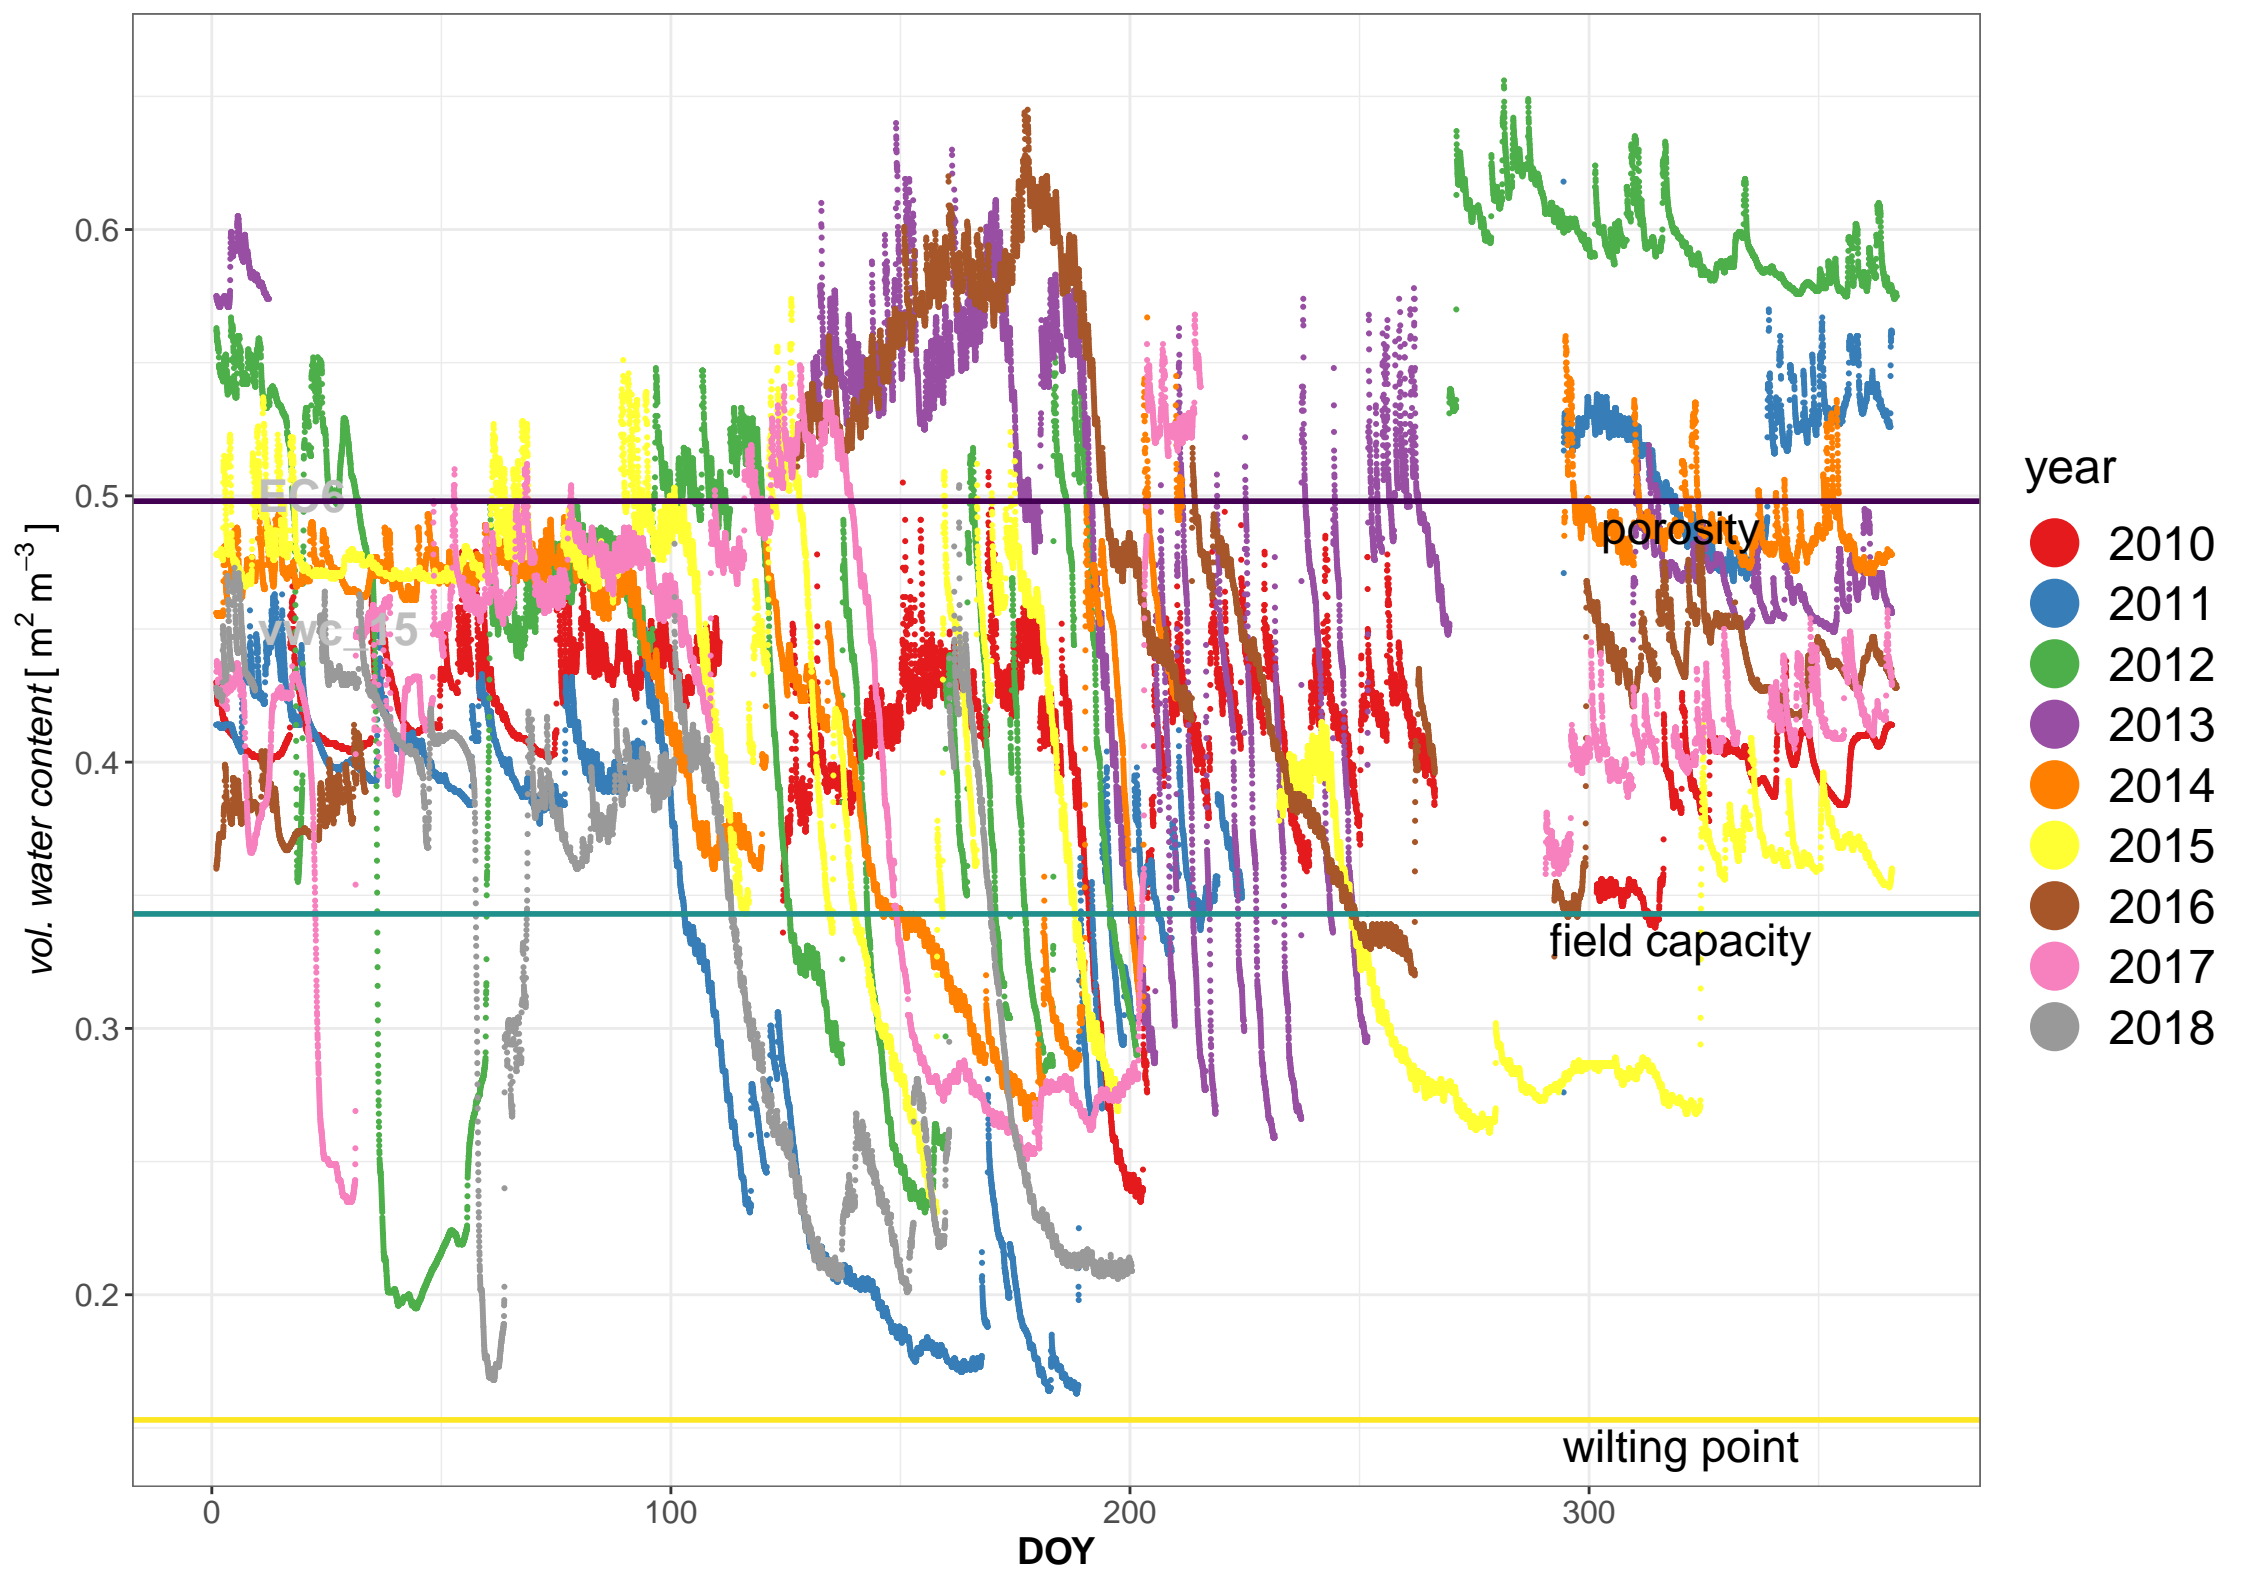

Supplement: Supplementary file 50 [file ec6vwc_15_DOY.pdf › ec6vwc_15_DOY.pdf]

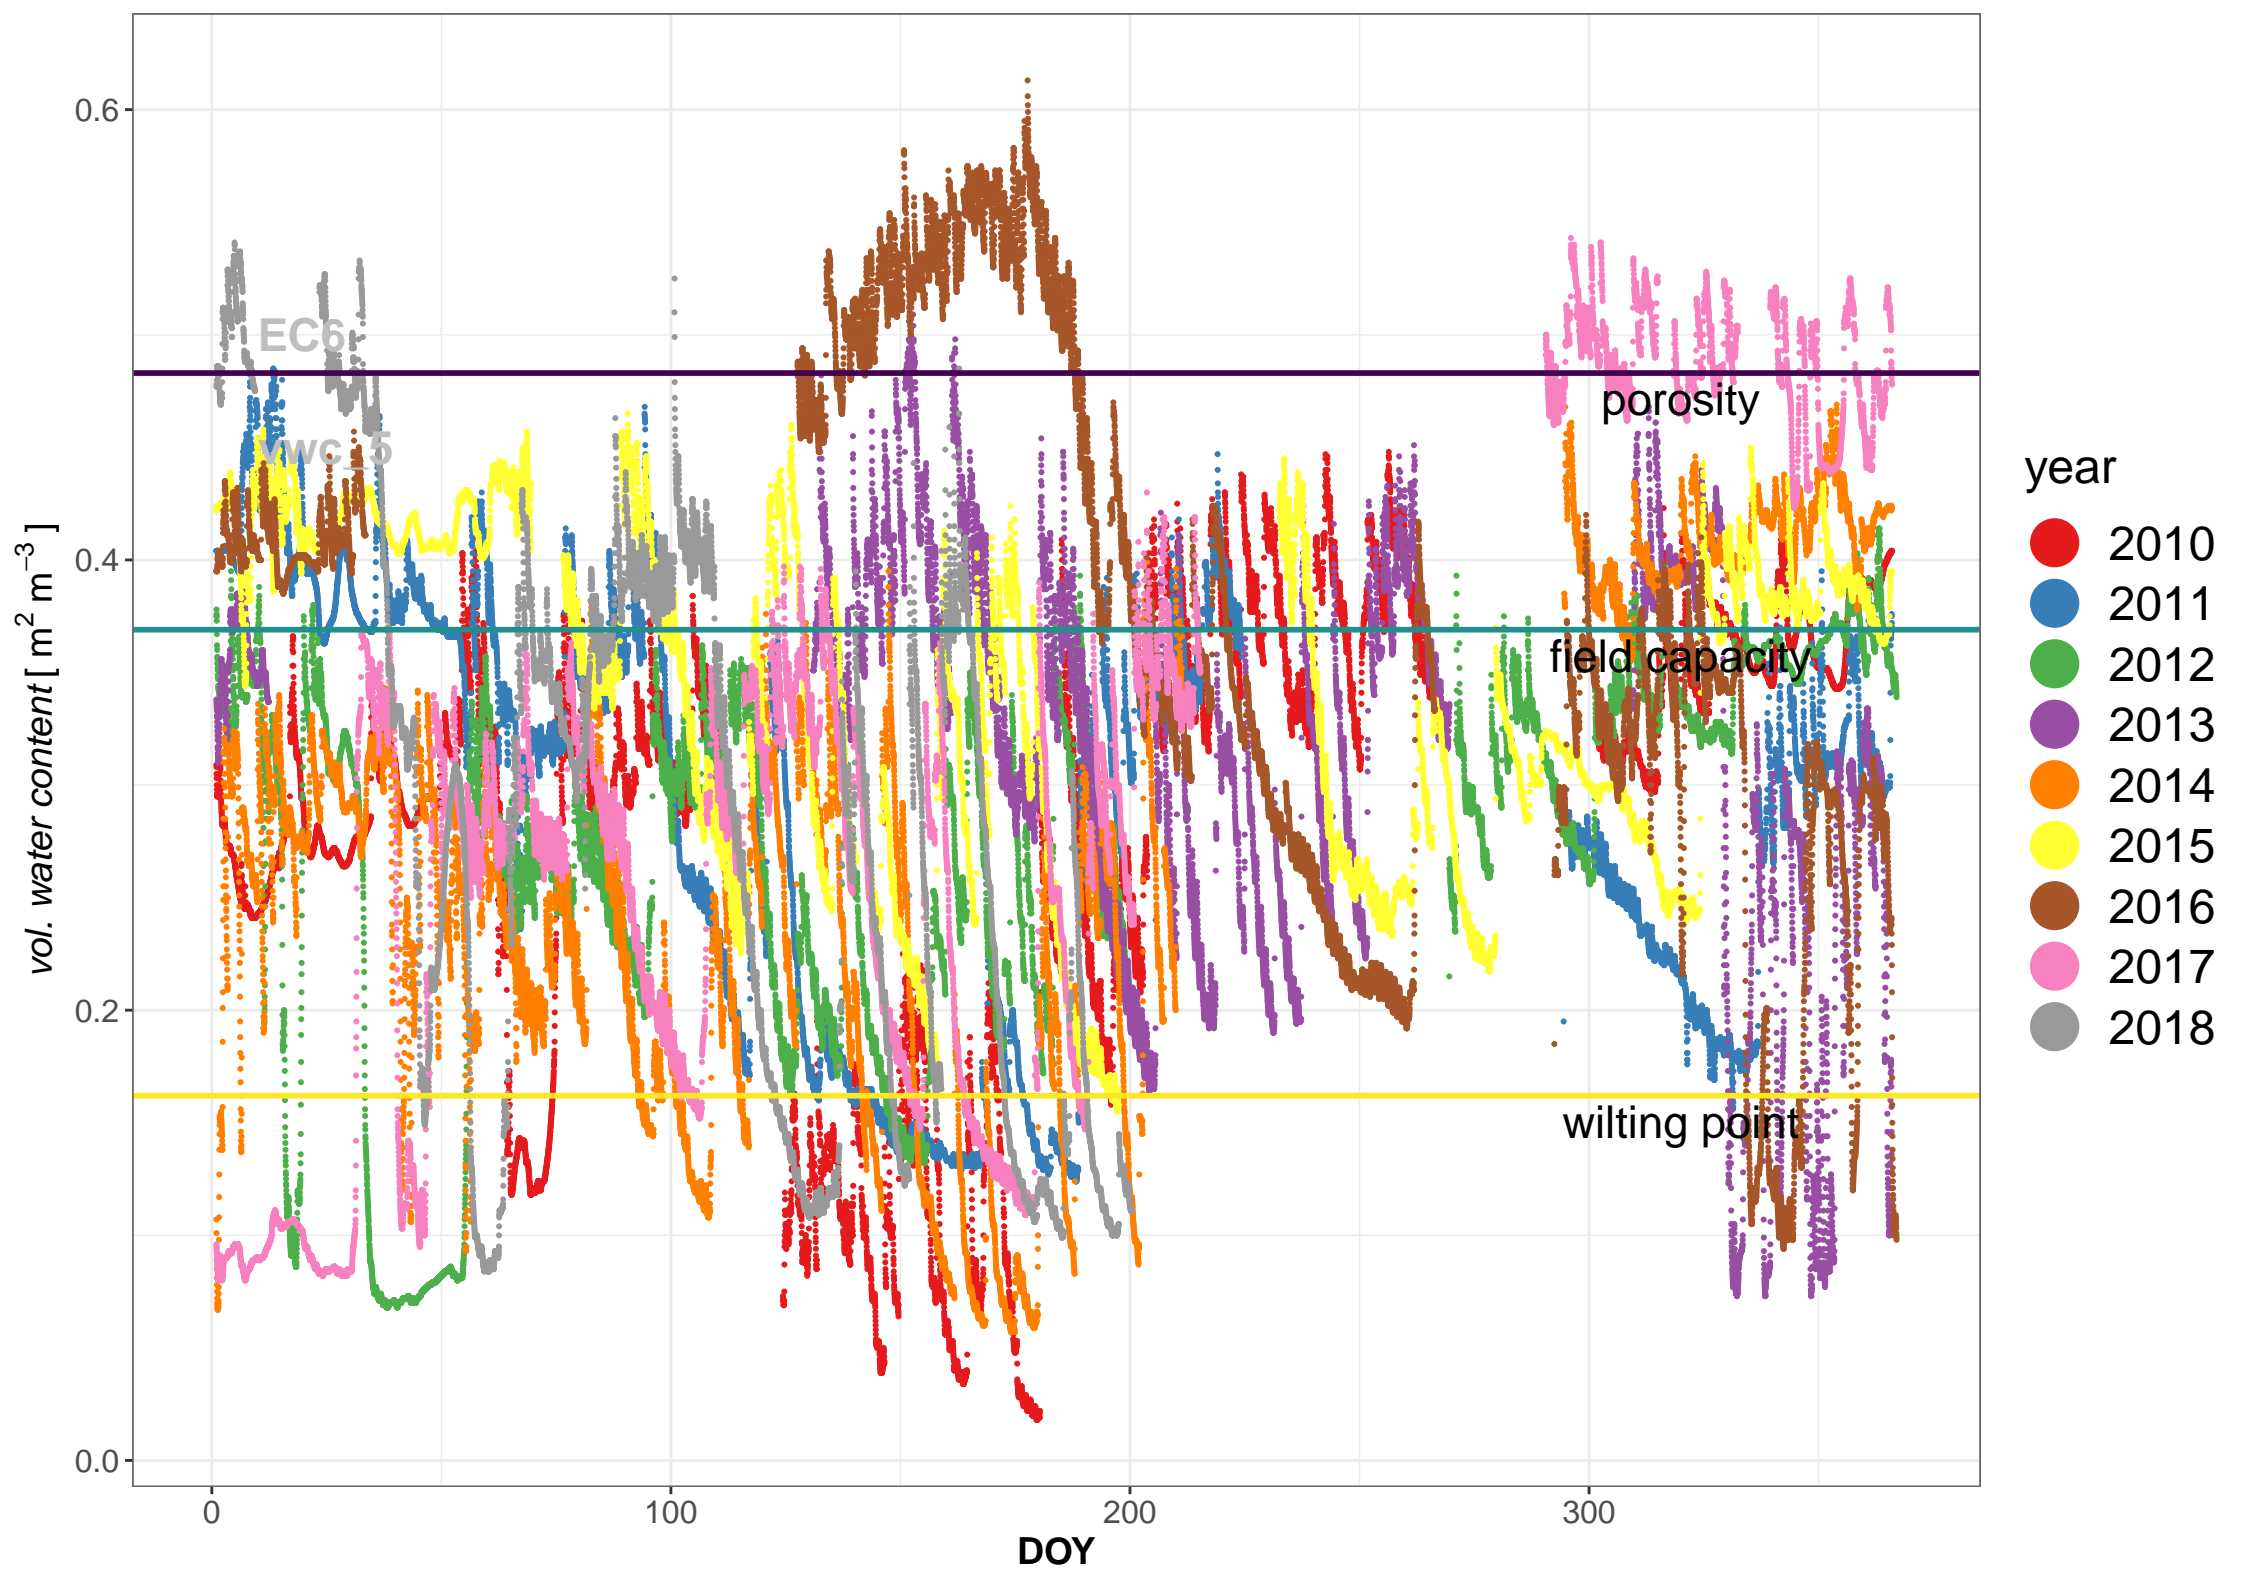

Supplement: Supplementary file 52 [file ec6vwc_5_DOY.pdf › ec6vwc_5_DOY.pdf]
